# Supplementary material
Source: PubMed Central journal article supplement (PMC8395655)

# Mn- and Co-Catalyzed Aminocyclizations of Unsaturated Hydrazones Providing a Broad Range of Functionalized Pyrazolines

Moritz Balkenhohl, Sebastian Kölbl, Tony Georgiev, and Erick M. Carreira\*

*Laboratorium für Organische Chemie  
Eidgenössische Technische Hochschule Zürich  
8093 Zürich, Switzerland  
erickm.carreira@org.chem.ethz.ch*

## Supporting Information

### Table of Content

|                                                                                             |        |
|---------------------------------------------------------------------------------------------|--------|
| General Information.....                                                                    | SI-2   |
| General Procedures .....                                                                    | SI-4   |
| Optimization of Reaction Conditions.....                                                    | SI-7   |
| TEMPO Trapping Experiments.....                                                             | SI-9   |
| Preparation of Compounds <b>1</b> to <b>17</b> .....                                        | SI-11  |
| Single Crystal X-Ray Data.....                                                              | SI-92  |
| <sup>1</sup> H NMR and <sup>13</sup> C NMR Spectra of Compounds <b>1</b> to <b>17</b> ..... | SI-103 |

## General Information

Unless otherwise noted, all reactions were carried out under nitrogen atmosphere in glassware dried with a heat gun (650 °C) under high vacuum (<1 mbar). Syringes which were used to transfer anhydrous solvents or reagents were purged thrice with nitrogen prior to use. All reagents were purchased from commercial suppliers (ABCR, ACROS, Sigma Aldrich, Fluka, TCI, Strem, Alfa, Combi-Blocks or Fluorochem) and used without further purification. Anhydrous solvents over molecular sieves were purchase from Acros and used as received.

## Chromatography

Analytical thin layer chromatography (TLC) was performed on Merck silica gel 60 F254 TLC glass plates and visualized with 254 nm light and potassium permanganate followed by heating. Organic solutions were concentrated by rotary evaporation at 40 °C. Purification of reaction products was carried out by flash chromatography using Brunschwig silica 32-63, 60Å under 0.3–0.5 bar overpressure. Neutral silica gel was obtained from NACALAI TESQUE, INC.: Silica Gel 60, spherical, neutral.

**KMnO<sub>4</sub> solution:** KMnO<sub>4</sub> (3.0 g), 5 drops of conc. H<sub>2</sub>SO<sub>4</sub> in water (300 mL).

## Analytical Data

**NMR:**  $^1\text{H}$  NMR spectra were recorded on a Bruker AVIII 600 MHz spectrometer with He or prodigy  $\text{N}_2$  cryo-probes, Bruker AVIII HD 500 MHz and 400 spectrometers as well as Bruker Neo 500 MHz and 400 MHz spectrometers, and are reported in ppm with the solvent resonance as the reference unless noted otherwise ( $\text{CDCl}_3$  at 7.26 ppm,  $\text{C}_6\text{D}_6$  at 7.16 ppm,  $\text{CD}_2\text{Cl}_2$  at 5.32 ppm,  $\text{DMSO-d}_6$  at 2.50 ppm,  $\text{CD}_3\text{CN}$  at 1.94 ppm). Peaks are reported as (s = singlet, d = doublet, t = triplet, q = quartet, m = multiplet or unresolved, br = broad signal, coupling constant(s) in Hz, integration).  $^{13}\text{C}$  NMR spectra were recorded with  $^1\text{H}$ -decoupling on Bruker AVIII 150 MHz spectrometers with He or prodigy  $\text{N}_2$  cryo-probes, Bruker AVIII HD 125 MHz and 100 MHz spectrometers as well as Bruker Neo 125 MHz and 100 MHz spectrometers, and are reported in ppm with the solvent resonance as the reference unless noted otherwise ( $\text{CDCl}_3$  at 77.16 ppm,  $\text{C}_6\text{D}_6$  at 128.06 ppm,  $\text{CD}_2\text{Cl}_2$  at 54.00 ppm,  $\text{DMSO-d}_6$  at 39.52 ppm,  $\text{CD}_3\text{CN}$  at 1.32 ppm).

**Mass spectrometry:** High resolution mass spectrometric data were obtained at the mass spectrometry service operated by the Laboratory of Organic Chemistry at the ETHZ on VG-TRIBRID for electron impact ionization (ESI), Varian IonSpec Spectrometer for electrospray ionization (ESI), or IonSpec Ultima Fourier Transform Mass Spectrometer for matrix-assisted laser desorption/ionization (MALDI) and are reported as ( $m/z$ ). Molecular fragments are reported starting at a relative intensity of 10-20%.

**Infrared spectra** (IR) were recorded neat on a Perkin-Elmer Spectrum Two FT-IR spectrometer. The main peaks are reported as absorption maxima ( $\text{cm}^{-1}$ ).

**Melting points** (m.p.) were determined on a Büchi B545 Melting Point Apparatus.

## General Procedures

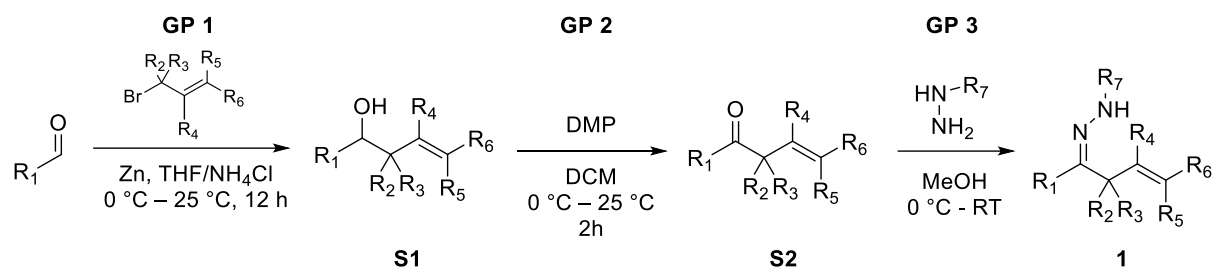

Scheme 1: General Procedures **GP 1 – GP 3**

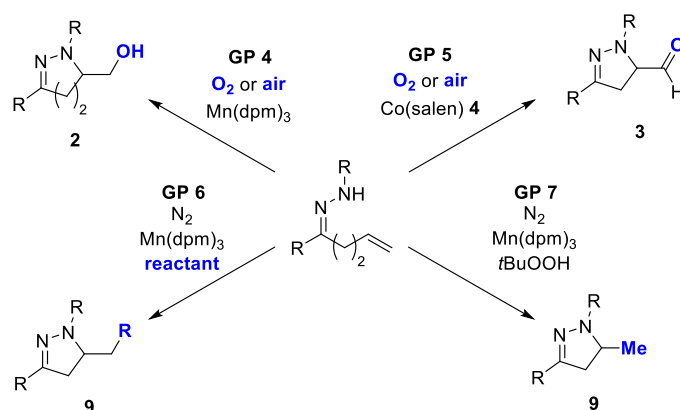

Scheme 2: General Procedures **GP 4 – GP 7**

### General Procedure 1: Preparation of unsaturated alcohols **S1**

Under ambient atmosphere, the given aldehyde was dissolved in THF (2 mL/mmol aldehyde) and a sat. aq. NH<sub>4</sub>Cl solution (2 mL/mmol aldehyde) and the given allylic bromide (2 equiv) was added. After cooling to 0 °C, zinc dust (2 equiv) was added portion wise to the reaction mixture and, after slow warming, stirring proceeded at 25 °C for 12 h. The reaction mixture was extracted with ethyl acetate (3 x 100 mL) and the organic phase was dried using Na<sub>2</sub>SO<sub>4</sub>, filtered and the solvents removed in vacuo. If purification was required, it was performed via flash column chromatography on silica gel using the appropriate eluent.

### General Procedure 2: Preparation of unsaturated ketones **S2**

Under ambient atmosphere, DMP (1.2 – 1.5 equiv) was added to a solution of alcohol **S1** (1 equiv) in DCM (0.6 M) at 0 °C. After stirring at 25 °C until completion, the reaction was quenched by slow addition of a sat. aq. NaHCO<sub>3</sub> solution (2 mL/mmol alcohol) and a 40% aq. NaHSO<sub>3</sub> solution (0.5 mL/mmol alcohol) at 0 °C. After stirring for 20 min at the same temperature, the reaction mixture was extracted with DCM (3 x 100 mL), the organic phase

dried using Na<sub>2</sub>SO<sub>4</sub>, filtered and the solvents removed in vacuo. The crude product was purified by flash column chromatography on silica gel using the appropriate eluent.

**General Procedure 3:** Preparation of unsaturated hydrazones **1**

Ketone **S2** was dissolved in MeOH (1 M) and cooled to 0 °C. After addition of the corresponding hydrazide (1.0 – 1.5 equiv), the reaction was stirred at the given temperature for the given time. The reaction was monitored carefully by TLC as prolonged reaction times led to isomerization of the desired hydrazone. If the product precipitated from the reaction mixture, filtration gave the pure hydrazone. If further purification was required, the solvent was removed in vacuo, and the crude purified by flash column chromatography on silica gel using the appropriate eluent.<sup>1</sup>

**General Procedure 4:** Manganese-catalyzed aerobic cyclization of unsaturated hydrazones **1** to give pyrazoline alcohols **2**

Hydrazone **1** (1 equiv) and Mn(dpm)<sub>3</sub> (0.1 equiv) were added to a dry flask or crimp vial (5 mL) which was evacuated and set under O<sub>2</sub> atmosphere using a balloon. *i*PrOH (0.1 M) was added and the reaction mixture stirred at 55 °C for 2 h. After addition of water (10 mL), the mixture was extracted with ethyl acetate (3 x 30 mL). The organic phase was then dried over Na<sub>2</sub>SO<sub>4</sub>, filtered, and concentrated in vacuo. The crude product was purified by flash column chromatography on silica gel using the appropriate eluent.

**General Procedure 5:** Cobalt-catalyzed cyclization of unsaturated hydrazones **1** to give pyrazoline aldehydes **3**

Hydrazone **1** (1 equiv) and Co(salen) **4** (0.1 equiv) were added to a dry flask or crimp vial (5 mL) which was evacuated and set under O<sub>2</sub> atmosphere using a balloon. *i*PrOH (0.1 M) was added and the reaction mixture stirred at 25 °C for 1 h. After addition of water (10 mL), the mixture was extracted with ethyl acetate (3 x 30 mL). The organic phase was then dried over Na<sub>2</sub>SO<sub>4</sub>, filtered, and concentrated in vacuo. The crude product was purified by flash column chromatography on silica gel using the appropriate eluent.

**General Procedure 6:** Manganese-catalyzed cyclization of unsaturated hydrazones **1** to give pyrazolines **9a–e**

Hydrazone **1** (1 equiv) and Mn(dpm)<sub>3</sub> (0.1 equiv) were dissolved/suspended in the given solvent (0.1 M) and *t*BuOOH (2 equiv) and the respective reactant (1.2 – 4 equiv) was added and the reaction mixture stirred at 55 °C for the given time. After addition of water (10 mL), the mixture was extracted with ethyl acetate (3 x 30 mL). The organic phase was then dried over

---

<sup>1</sup> Depending on substituents, some hydrazones form *E/Z*-mixtures.

Na<sub>2</sub>SO<sub>4</sub>, filtered, and concentrated in vacuo. The crude product was purified by flash column chromatography on silica gel using the appropriate eluent.

**General Procedure 7:** Manganese-catalyzed cyclization of unsaturated hydrazones **1** to give pyrazolines **9f–h**

Hydrazone **1** (1 equiv) and Mn(dpm)<sub>3</sub> (0.1 equiv) were dissolved/suspended in the given solvent (0.1 M) and *t*BuOOH (2 equiv) was added and the reaction mixture stirred at 55 °C for the given time. After addition of water (10 mL), the mixture was extracted with ethyl acetate (3 x 30 mL). The organic phase was then dried over Na<sub>2</sub>SO<sub>4</sub>, filtered, and concentrated in vacuo. The crude product was purified by flash column chromatography on silica gel using the appropriate eluent.

## Optimization of Reaction Conditions

**Table T1:** Catalyst screening.

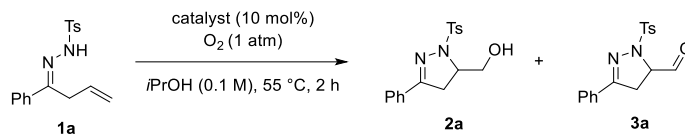

| entry | catalyst              | yield <b>2a</b> <sup>[a]</sup> | yield <b>3a</b> <sup>[a]</sup> |
|-------|-----------------------|--------------------------------|--------------------------------|
| 1     | MnCl <sub>2</sub>     | 3%                             | -                              |
| 2     | Mn(dpm) <sub>3</sub>  | 80% (78%) <sup>[b]</sup>       | 1.6%                           |
| 3     | Mn(acac) <sub>3</sub> | 31%                            | 15%                            |
| 4     | Mn(OAc) <sub>2</sub>  | -                              | traces                         |
| 5     | Mn(salen) <b>5</b>    | -                              | -                              |
| 6     | CoCl <sub>2</sub>     | -                              | -                              |
| 7     | Co(modp) <sub>2</sub> | 40%                            | 4%                             |
| 8     | Co(OAc) <sub>2</sub>  | -                              | traces                         |
| 9     | Co(dpm) <sub>2</sub>  | 31%                            | traces                         |
| 10    | Co(salen) <b>4</b>    | 24% <sup>[b]</sup>             | 70% <sup>[b]</sup>             |
| 11    | CuCl <sub>2</sub>     | traces                         | 4%                             |
| 12    | Cu(acac) <sub>2</sub> | 13%                            | 12%                            |
| 13    | Cu(dpm) <sub>2</sub>  | -                              | -                              |
| 14    | Fe(dpm) <sub>3</sub>  | -                              | -                              |
| 15    | PdCl <sub>2</sub>     | -                              | -                              |
| 16    | Pd(OAc) <sub>2</sub>  | traces                         | -                              |
| 17    | NiCl <sub>2</sub>     | -                              | -                              |
| 18    | Ni(acac) <sub>2</sub> | 8%                             | -                              |
| 19    | CrCl <sub>3</sub>     | -                              | -                              |

[a] NMR yield using 1,3,5-trimethoxybenzene as standard. [b] Isolated yield.

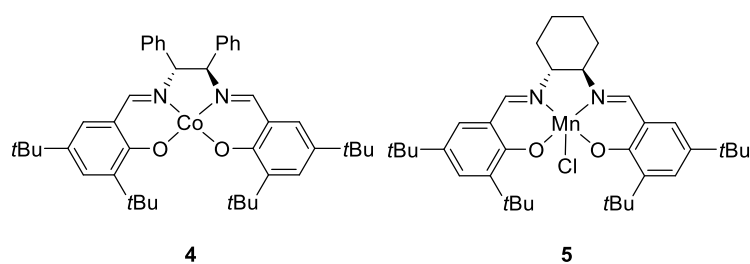

**Table T2:** Solvent and concentration screening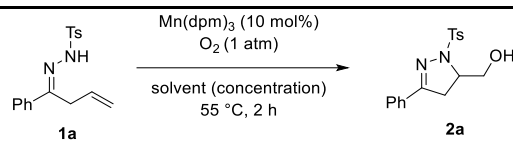

| entry | solvent       | catalyst           | Concentration [M] | yield <b>2a</b> <sup>[a]</sup> |
|-------|---------------|--------------------|-------------------|--------------------------------|
| 1     | DCE           | $\text{Mn(dpm)}_3$ | 0.1               | 17%                            |
| 2     | acetone       | $\text{Mn(dpm)}_3$ | 0.1               | 20%                            |
| 3     | toluene       | $\text{Mn(dpm)}_3$ | 0.1               | 30%                            |
| 4     | HFIP          | $\text{Mn(dpm)}_3$ | 0.1               | 20%                            |
| 5     | <i>i</i> PrOH | $\text{Mn(dpm)}_3$ | 0.1               | 79% (78%) <sup>[b]</sup>       |
| 6     | <i>i</i> PrOH | $\text{Mn(dpm)}_3$ | 0.02              | 73%                            |
| 7     | <i>i</i> PrOH | $\text{Mn(dpm)}_3$ | 0.5               | 71%                            |

[a] NMR yield using 1,3,5-trimethoxybenzene as standard. [b] Isolated yield of **2a**.

**Table T3:** Catalyst loading and temperature screening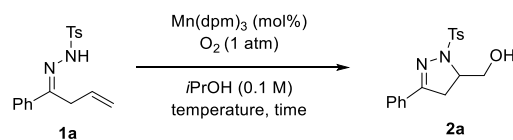

| entry | catalyst loading | temperature | time | yield <b>2a</b> <sup>[a]</sup> |
|-------|------------------|-------------|------|--------------------------------|
| 1     | 1%               | 55 °C       | 2 h  | 17%                            |
| 2     | 2%               | 55 °C       | 2 h  | 16%                            |
| 3     | 5%               | 55 °C       | 2 h  | 35%                            |
| 4     | 10%              | 55 °C       | 2 h  | 79% (78%) <sup>[b]</sup>       |
| 5     | 30%              | 55 °C       | 2 h  | 30%                            |
| 6     | 10%              | 25 °C       | 12 h | 65%                            |
| 7     | 10%              | 40 °C       | 2 h  | 76%                            |
| 8     | 10%              | 70 °C       | 2 h  | 66%                            |

[a] NMR yield using 1,3,5-trimethoxybenzene as standard. [b] Isolated yield of **2**.



## TEMPO Trapping Experiments

TEMPO trapping of General Procedure 4

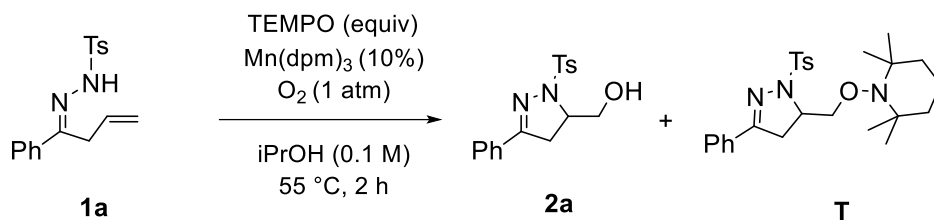

| entry | TEMPO     | yield (2a)       | yield (T) |
|-------|-----------|------------------|-----------|
| 1     | 0 equiv   | 79%              | -         |
| 2     | 0.1 equiv | 16% <sup>a</sup> | -         |
| 3     | 1.5 equiv | -                | 36%       |

<sup>a</sup> NMR yield using 1,3,5-trimethoxybenzene as standard.

### 2,2,6,6-Tetramethyl-1-((3-phenyl-1-tosyl-4,5-dihydro-1H-pyrazol-5-yl)methoxy)-piperidine (T)

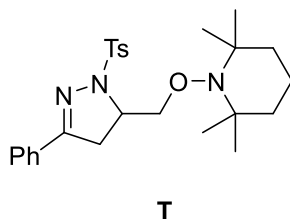

Pyrazoline **T** was prepared via **GP4**, using hydrazone **1a** (32 mg, 0.10 mmol), TEMPO (24 mg, 0.15 mmol) and Mn(dpm)<sub>3</sub> (6.0 mg, 10 μmol), and the reaction was stirred for 2 h. After work-up, the crude product was purified via column chromatography (hexane:ethyl acetate = 9:1, R<sub>f</sub> = 0.2) to give **T** (17 mg, 36 μmol, 36%) as a light yellow oil.

<sup>1</sup>H-NMR (400 MHz, CDCl<sub>3</sub>): δ / ppm = 7.81 – 7.76 (m, 2H), 7.72 – 7.67 (m, 2H), 7.44 – 7.35 (m, 3H), 7.29 – 7.26 (m, 2H), 4.31 (dd, *J* = 9.2, 3.8 Hz, 1H), 4.12 (dd, *J* = 9.2, 7.4 Hz, 1H), 3.96 (dddd, *J* = 11.1, 8.8, 7.3, 3.8 Hz, 1H), 3.14 (qd, *J* = 17.2, 9.9 Hz, 2H), 2.38 (s, 3H), 1.55 – 1.33 (m, 6H), 1.32 – 1.15 (m, 6H), 1.15 – 1.00 (m, 6H).

The spectrum is in agreement with the literature.<sup>2</sup>

<sup>2</sup> Chen, S.; Chen, W.; Chen, X.; Chen, G.; Ackermann, L.; Tian, X. *Org. Lett.* **2019**, *21*, 7787-7790.

## TEMPO trapping of General Procedure 5

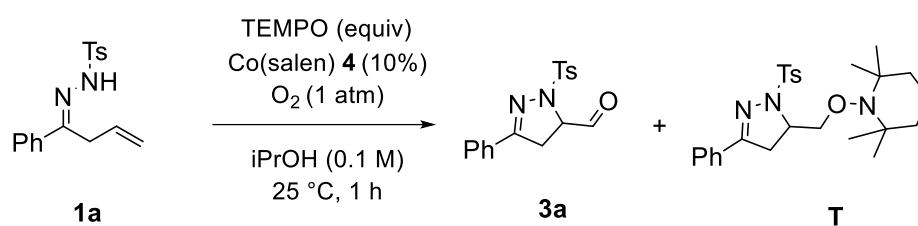

| entry | TEMPO     | yield (3a)       | yield (T)        |
|-------|-----------|------------------|------------------|
| 1     | 0 equiv   | 70%              | -                |
| 2     | 0.1 equiv | 41% <sup>a</sup> | -                |
| 3     | 1.5 equiv | 26% <sup>a</sup> | 25% <sup>a</sup> |

<sup>a</sup> NMR yield using 1,3,5-trimethoxybenzene as standard.

## TEMPO trapping of General Procedure 6

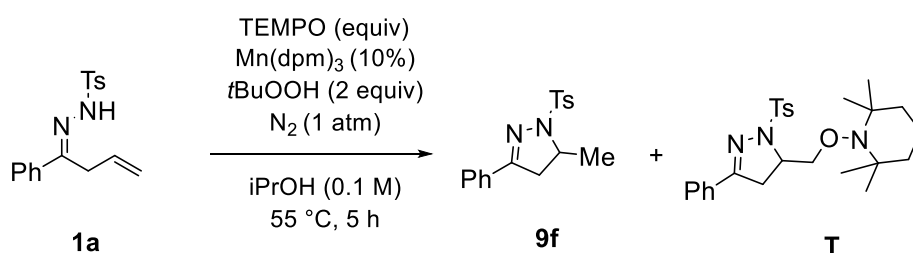

| entry | TEMPO     | yield (9f)       | yield (T)        |
|-------|-----------|------------------|------------------|
| 1     | 0 equiv   | 55%              | -                |
| 2     | 0.1 equiv | 43% <sup>a</sup> | -                |
| 3     | 1.5 equiv | -                | 65% <sup>a</sup> |

<sup>a</sup> NMR yield using 1,3,5-trimethoxybenzene as standard.

## Preparation of Compounds 1 to 17

### Starting Material Synthesis (1a–v)

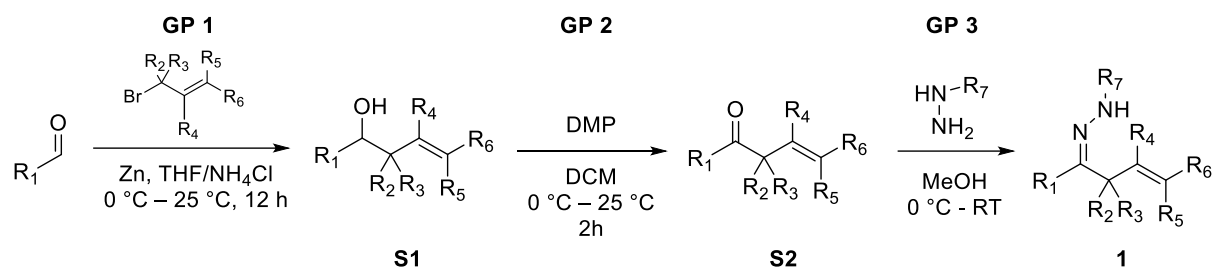

### 4-Methyl-*N'*-(1-phenylbut-3-en-1-ylidene)benzenesulfonohydrazide (1a)

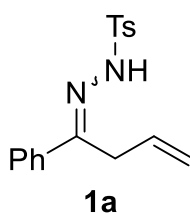

Ketone **S2a** was prepared via **GP2**, using 1-Phenyl-3-buten-1-ol (1.80 g, 12.1 mmol) and DMP (7.68 g, 18.1 mmol) and the reaction was stirred for 1 h. After work-up, the crude product was purified via column chromatography (hexane:ethyl acetate = 9.5:0.5) to give **S2a** (1.45 g, 9.92 mmol, 82%) as a colorless oil which was used directly in the next step.

Hydrazone **1a** was prepared via **GP3**, using ketone **S2a** (826 mg, 5.65 mmol), tosylhydrazide (1.16 g, 6.22 mmol) and the reaction was stirred for 4.5 h. After removal of solvents, the crude product was purified via column chromatography (hexane:ethyl acetate = 9.5:0.5) and recrystallized from hexane/ethyl acetate to give **1a** (1.12 g, 3.56 mmol, 63%, d.r. = >20:1) as a colorless solid.

**<sup>1</sup>H-NMR (400 MHz, CDCl<sub>3</sub>):**  $\delta$  / ppm = 7.89 – 7.84 (m, 2H), 7.70 – 7.59 (m, 3H), 7.37 – 7.32 (m, 3H), 7.32 – 7.28 (m, 2H), 5.84 (ddt,  $J$  = 17.4, 10.2, 5.0 Hz, 1H), 5.07 (dtd,  $J$  = 10.3, 2.0, 0.9 Hz, 1H), 4.79 (dtd,  $J$  = 17.4, 2.1, 0.9 Hz, 1H), 3.39 (dt,  $J$  = 5.0, 2.0 Hz, 2H), 2.41 (s, 3H).

**<sup>13</sup>C-NMR (101 MHz, CDCl<sub>3</sub>):**  $\delta$  / ppm = 153.0, 144.3, 136.8, 135.4, 129.85, 129.78, 129.7, 128.6, 128.2, 126.5, 118.0, 31.9, 21.7.

The spectra are in agreement with the literature.<sup>3</sup>

<sup>3</sup> Hu, X.-Q.; Chen, J.-R.; Wei, Q.; Liu, F.-L.; Deng, Q.-H.; You-Quan, Z.; Xiao, W.-J. *Eur. J. Org. Chem.* **2014**, 3082-3086.

### ***N'*-(1-(4-Methoxyphenyl)but-3-en-1-ylidene)-4-methylbenzenesulfonohydrazide (1b)**

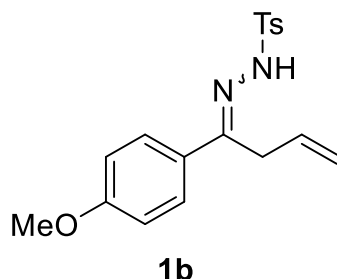

Alcohol **S1b** was prepared by dissolving 4-methoxybenzaldehyde (2.43 mL, 20.0 mmol) in dry Et<sub>2</sub>O (10 mL) and cooling the mixture to 0 °C. Allylmagnesium bromide (1.0 M in Et<sub>2</sub>O, 40.0 mL, 40.0 mmol) was added dropwise and the reaction was warmed slowly and stirred at 25 °C for 12 h. The reaction mixture was quenched with sat. aq. NH<sub>4</sub>Cl (30 mL) and extracted with ethyl acetate (3 x 30 mL). The organic phase was then dried over Na<sub>2</sub>SO<sub>4</sub>, filtered, and concentrated in vacuo. The crude product was purified by flash column chromatography (hexane:ethyl acetate = 8:2) to give **S1b** (2.57 g, 14.4 mmol, 72%) as a colorless oil which was used directly in the next step.

Ketone **S2b** was prepared via **GP2**, using **S1b** (2.21 g, 12.4 mmol) and DMP (5.36 g, 17.4 mmol) and the reaction was stirred for 20 min. After work-up, the crude product was purified via column chromatography (hexane:ethyl acetate = 8.5:1.5) to give **S2b** (1.27 g, 7.20 mmol, 58%) as a colorless oil which was used directly in the next step.

Hydrazone **1b** was prepared via **GP3**, using ketone **S2b** (176 mg, 1.00 mmol), tosylhydrazide (186 mg, 1.00 mmol) and the reaction was stirred for 4 h. After removal of solvents, the crude product was purified via column chromatography (hexane:ethyl acetate = 8:2) to give **1b** (200 mg, 581 μmol, 58%, d.r. = >20:1) as a colorless solid.

**<sup>1</sup>H-NMR (400 MHz, CDCl<sub>3</sub>):** δ / ppm = 7.87 – 7.83 (m, 2H), 7.63 – 7.57 (m, 2H), 7.50 (s, 1H), 7.32 – 7.27 (m, 2H), 6.88 – 6.82 (m, 2H), 5.82 (ddt, *J* = 17.4, 10.2, 5.0 Hz, 1H), 5.05 (dtd, *J* = 10.3, 2.0, 0.9 Hz, 1H), 4.76 (dtd, *J* = 17.4, 2.1, 0.9 Hz, 1H), 3.81 (s, 3H), 3.36 (dt, *J* = 5.0, 2.0 Hz, 2H).

**<sup>13</sup>C-NMR (101 MHz, CDCl<sub>3</sub>):** δ / ppm = 161.1, 153.0, 144.2, 135.5, 130.0, 129.7, 129.3, 128.2, 128.0, 117.9, 113.9, 55.5, 31.8, 21.7.

The spectra are in agreement with the literature.<sup>4</sup>

<sup>4</sup> Xu, Z.-Q.; Wang, W.-B.; Zheng, L.-C.; Li, L.; Duan, L.; Li, Y.-M. *Org. Biomol. Chem.* **2019**, *17*, 9026-9038.

### Methyl 4-(1-(2-tosylhydrazineylidene)but-3-en-1-yl)benzoate (**1c**)

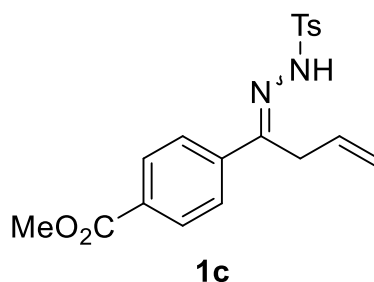

Alcohol **S1c** was prepared via **GP1**, using methyl 4-formylbenzoate (3.28 g, 20.0 mmol), allyl bromide (3.46 mL, 40.0 mmol) and zinc powder (2.62 g, 40.0 mmol) and the reaction was stirred for 12 h. After work-up, the crude product **S1c** (3.42 g, 16.6 mmol, 83%) was obtained as a colorless oil which was used directly in the next step.

Ketone **S2c** was prepared via **GP2**, using **S1c** (4.12 g, 20.0 mmol) and DMP (10.2 g, 24.0 mmol) and the reaction was stirred for 2 h. After work-up, the crude product was purified via column chromatography (hexane:ethyl acetate = 9:1) to give **S2c** (3.28 g, 16.0 mmol, 80%) as a colorless solid which was used directly in the next step.

Hydrazone **1c** was prepared via **GP3**, using ketone **S2c** (408 mg, 2.00 mmol) and tosylhydrazide (558 mg, 3.00 mmol) and the reaction was stirred for 2 h. After removal of solvents, the crude product was purified via column chromatography (hexane:ethyl acetate = 7:3) to give **1c** (438 mg, 1.18 mmol, 59%, d.r. = >20:1) as a colorless solid.

**<sup>1</sup>H-NMR (400 MHz, C<sub>6</sub>D<sub>6</sub>):**  $\delta$  / ppm = 8.12 – 7.95 (m, 5H), 7.57 – 7.45 (m, 2H), 6.80 – 6.69 (m, 2H), 5.16 (ddt,  $J$  = 17.3, 10.3, 5.1 Hz, 1H), 4.68 – 4.60 (m, 1H), 4.55 – 4.48 (m, 1H), 3.45 (s, 3H), 2.68 – 2.56 (m, 2H), 1.78 (s, 3H).

**<sup>13</sup>C-NMR (101 MHz, C<sub>6</sub>D<sub>6</sub>):**  $\delta$  / ppm = 166.2, 150.9, 144.0, 141.2, 136.6, 131.4, 130.0, 129.8, 129.7, 128.5, 126.5, 117.3, 51.7, 31.1, 21.1.

**IR (Diamond-ATR, neat):**  $\tilde{\nu}$  / cm<sup>-1</sup> = 3194 (broad), 2952, 1720, 1611, 1597, 1436, 1406, 1379, 1278, 1167, 1109, 1018, 814, 774, 733, 705, 670, 552, 501.

**MS (ESI):**  $m/z$  (%) = 373 (73), 371 (50), 223 (20), 217 (33), 194 (48), 159 (24).

**HRMS (ESI) for C<sub>18</sub>H<sub>21</sub>N<sub>2</sub>O<sub>3</sub>S (373.1217):** 373.1209 (M<sup>+</sup>+H<sup>+</sup>).

**M.p. (°C):** 100–105.

**N'-(1-(3-Fluorophenyl)but-3-en-1-ylidene)-4-methylbenzenesulfonohydrazide (1d)**

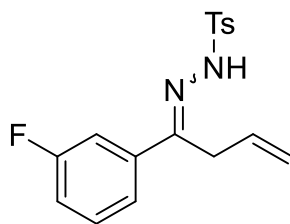

**1d**

Alcohol **S1d** was prepared via **GP1**, using 3-fluorobenzaldehyde (2.20 mL, 20.7 mmol), allyl bromide (3.46 mL, 40.0 mmol) and zinc powder (2.62 g, 40.0 mmol) and the reaction was stirred for 14 h. After work-up, the crude product **S1d** (3.36 g, 20.2 mmol, 97%) was obtained as a colorless oil which was used directly in the next step.

Ketone **S2d** was prepared via **GP2**, using **S1d** (3.20 g, 19.3 mmol) and DMP (12.2 g, 28.9 mmol) and the reaction was stirred for 30 min. After work-up, the crude product was purified via column chromatography (hexane:ethyl acetate = 9:1) to give **S2d** (2.60 g, 15.8 mmol, 82%) as a light yellow oil which was used directly in the next step.

Hydrazone **1d** was prepared via **GP3**, using ketone **S2d** (493 mg, 3.00 mmol), tosylhydrazide (838 mg, 4.50 mmol) and the reaction was stirred for 4 h. After removal of solvents, the crude product was purified via column chromatography (hexane:ethyl acetate = 8:2) to give **1d** (752 mg, 2.26 mmol, 75%, d.r. = >20:1) as a colorless solid.

**<sup>1</sup>H-NMR (400 MHz, CDCl<sub>3</sub>):**  $\delta$  / ppm = 7.89 – 7.83 (m, 3H), 7.41 – 7.27 (m, 5H), 7.04 (tdd,  $J$  = 8.2, 2.6, 1.1 Hz, 1H), 5.82 (ddt,  $J$  = 17.4, 10.2, 5.1 Hz, 1H), 5.07 (dtd,  $J$  = 10.3, 1.9, 0.8 Hz, 1H), 4.78 (dtd,  $J$  = 17.4, 2.1, 0.9 Hz, 1H), 3.36 (dt,  $J$  = 5.1, 2.0 Hz, 2H), 2.41 (s, 3H).

The spectrum is in agreement with the literature.<sup>5</sup>

<sup>5</sup> Hu, X.-Q.; Chen, J.-R.; Wei, Q.; Liu, F.-L.; Deng, Q.-H.; Beauchemin, A. M.; Xiao, W.-J. *Angew. Chem., Int. Ed.* **2014**, *53*, 12163-12167.

### ***N'*-(1-(4-Ethylphenyl)but-3-en-1-ylidene)-4-methylbenzenesulfonohydrazide (1e)**

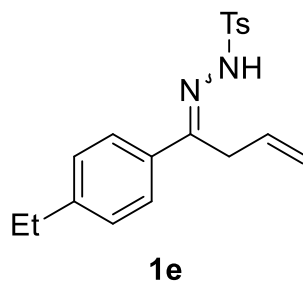

Alcohol **S1e** was prepared via **GP1**, using 4-ethylbenzaldehyde (2.68 g, 20.0 mmol), allyl bromide (3.46 mL, 40.0 mmol) and zinc powder (2.62 g, 40.0 mmol) and the reaction was stirred for 12 h. After work-up, the crude product **S1e** (2.35 g, 13.3 mmol, 67%) was obtained as a colorless oil which was used directly in the next step.

Ketone **S2e** was prepared via **GP2**, using **S1e** (2.30 g, 11.2 mmol) and DMP (5.72 g, 13.5 mmol) and the reaction was stirred for 10 min. After work-up, the crude product was purified via column chromatography (hexane:ethyl acetate = 10:0.3) to give **S2e** (1.52 g, 8.70 mmol, 78%) as a colorless oil which was used directly in the next step.

Hydrazone **1e** was prepared via **GP3**, using ketone **S2e** (350 mg, 2.00 mmol), tosylhydrazide (559 mg, 3.00 mmol) and the reaction was stirred for 12 h. After filtration **1e** (383 mg, 1.12 mmol, 56%, d.r. = >20:1) was obtained as a colorless solid.

**<sup>1</sup>H-NMR (400 MHz, C<sub>6</sub>D<sub>6</sub>):**  $\delta$  / ppm = 8.12 – 8.06 (m, 2H), 8.03 (s, 1H), 7.62 – 7.54 (m, 2H), 6.98 – 6.92 (m, 2H), 6.77 – 6.70 (m, 2H), 5.32 (ddt,  $J$  = 17.4, 10.3, 5.2 Hz, 1H), 4.74 – 4.57 (m, 2H), 2.82 (dt,  $J$  = 5.2, 2.0 Hz, 2H), 2.35 (q,  $J$  = 7.6 Hz, 2H), 1.79 (s, 3H), 1.00 (t,  $J$  = 7.6 Hz, 3H).

**<sup>13</sup>C-NMR (101 MHz, C<sub>6</sub>D<sub>6</sub>):**  $\delta$  / ppm = 152.6, 146.0, 143.7, 136.9, 135.0, 130.4, 129.6, 128.6, 128.2, 126.8, 117.1, 31.4, 28.9, 21.1, 15.6.

**IR (Diamond-ATR, neat):**  $\tilde{\nu}$  / cm<sup>-1</sup> = 3222, 2966, 2931, 273, 1598, 1392, 1330, 1306, 1167, 1084, 682, 589, 551.

**MS (ESI):**  $m/z$  (%) = 343 (100), 295 (52), 227 (14), 187 (28), 177 (30).

**HRMS (ESI) for C<sub>19</sub>H<sub>23</sub>N<sub>2</sub>O<sub>2</sub>S (343.1475):** 343.1477 (M+H)<sup>+</sup>.

**M.p. (°C):** 131–134.

***N'*-(1-(4-Cyanophenyl)but-3-en-1-ylidene)-4-methylbenzenesulfonohydrazide (1f)**

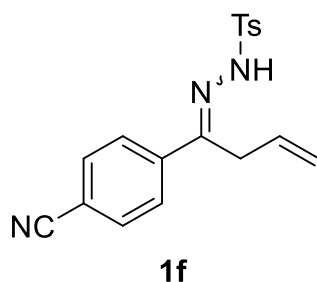

Alcohol **S1f** was prepared via **GP1**, using 4-cyanobenzaldehyde (1.31 g, 10.0 mmol), allyl bromide (1.73 mL, 20.0 mmol) and zinc powder (1.31 g, 20.0 mmol) and the reaction was stirred for 12 h. After work-up, the crude product **S1f** was obtained as a colorless oil which was used directly in the next step.

Ketone **S2f** was prepared via **GP2**, using **S1f** and DMP (5.09 g, 12.0 mmol) and the reaction was stirred for 90 min. After work-up, the crude product was purified via column chromatography (hexane:ethyl acetate = 9:1) to give **S2f** (1.29 g, 7.54 mmol, 75% over two steps) as a light yellow solid which was used directly in the next step.

Hydrazone **1f** was prepared via **GP3**, using ketone **S2f** (171 mg, 1.00 mmol), tosylhydrazide (279 mg, 1.50 mmol) and the reaction was stirred for 2 h at 0 °C. After removal of solvents, the crude product was purified via column chromatography (hexane:ethyl acetate = 7:3) using neutral silica to give **1f** (232 mg, 684 μmol, 68%, d.r. = >20:1) as a colorless solid.

**<sup>1</sup>H-NMR (400 MHz, DMSO-*d*<sub>6</sub>):** δ / ppm = 11.07 (s, 1H), 7.86 – 7.72 (m, 6H), 7.47 – 7.34 (m, 2H), 5.81 – 5.65 (m, 1H), 5.07 – 4.88 (m, 2H), 3.57 – 3.48 (m, 2H), 2.37 (s, 3H).

**<sup>13</sup>C-NMR (101 MHz, DMSO-*d*<sub>6</sub>):** δ / ppm = 150.4, 143.6, 140.8, 136.0, 132.4, 131.1, 129.6, 127.4, 126.9, 118.6, 117.5, 111.5, 30.7, 21.0.

**IR (Diamond-ATR, neat):**  $\tilde{\nu}$  / cm<sup>-1</sup> = 3205, 1596, 1614, 1389, 1336, 1303, 1160, 1074, 990, 895, 661, 567, 549.

**MS (ESI):** m/z (%) = 362 (51), 340 (39), 185 (24), 184 (100), 169 (14).

**HRMS (ESI) for C<sub>18</sub>H<sub>17</sub>N<sub>3</sub>NaO<sub>2</sub>S (362.0934):** 362.0936 (M+Na)<sup>+</sup>.

**M.p. (°C):** 163–165.



**4-Methyl-*N'*-(3-methyl-1-(thiophen-2-yl)but-3-en-1-ylidene)benzenesulfonohydrazide (1g)**

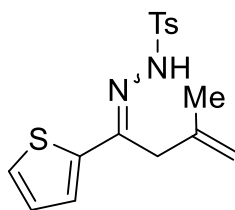

**1g**

Alcohol **S1g** was prepared via **GP1**, using thiophene-2-carboxaldehyde (1.12 g, 10.0 mmol), allyl bromide (1.73 mL, 20.0 mmol) and zinc powder (1.31 g, 20.0 mmol) and the reaction was stirred for 20 h. After work-up, the crude product **S1g** was obtained as a colorless oil which was used directly in the next step.

Ketone **S2m** was prepared via **GP2**, using **S1g** and DMP (5.09 g, 12.0 mmol) and the reaction was stirred for 90 min. After work-up, the crude product was purified via column chromatography (hexane:ethyl acetate = 9:1) to give **S2m** (1.44 g, 8.66 mmol, 87%) as a light yellow oil which was used directly in the next step.

Hydrazone **1g** was prepared via **GP3**, using ketone **S2m** (334 mg, 2.00 mmol), tosylhydrazide (558 mg, 3.00 mmol) and the reaction was stirred for 5 h. After filtration, hydrazone **1g** (374 mg, 1.12 mmol, 56%, d.r. = >20:1) was obtained as a light yellow solid.

**<sup>1</sup>H-NMR (400 MHz, DMSO-*d*<sub>6</sub>):**  $\delta$  / ppm = 10.48 (s, 1H), 7.80 – 7.75 (m, 2H), 7.73 (dd, *J* = 2.9, 1.3 Hz, 1H), 7.48 (dd, *J* = 5.1, 2.8 Hz, 1H), 7.39 (d, *J* = 8.1 Hz, 2H), 7.30 (dd, *J* = 5.1, 1.3 Hz, 1H), 4.69 (q, *J* = 1.6 Hz, 1H), 4.47 – 4.42 (m, 1H), 3.38 (s, 2H), 2.36 (s, 3H), 1.66 (s, 3H).

**<sup>13</sup>C-NMR (101 MHz, DMSO-*d*<sub>6</sub>):**  $\delta$  / ppm = 149.2, 143.3, 140.0, 139.4, 136.1, 129.4, 127.4, 126.5, 125.5, 125.3, 111.6, 35.4, 22.5, 21.0.

**IR (Diamond-ATR, neat):**  $\tilde{\nu}$  / cm<sup>-1</sup> = 3202, 3110, 1598, 1373, 1345, 1168, 1089, 860, 787, 656, 558.

**MS (ESI):** *m/z* (%) = 335 (100), 180 (83), 179 (16), 165 (34), 164 (18).

**HRMS (ESI) for C<sub>16</sub>H<sub>19</sub>N<sub>2</sub>O<sub>2</sub>S<sub>2</sub> (335.0882):** 335.0880 (M+H)<sup>+</sup>.

**M.p. (°C):** 153–154.

## **N'-(1-(Furan-3-yl)but-3-en-1-ylidene)-4-methylbenzenesulfonohydrazide (1h)**

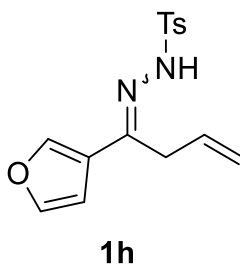

Alcohol **S1h** was prepared via **GP1**, using furan-3-carbaldehyde (1.73 g, 20.0 mmol), allyl bromide (3.46 mL, 40.0 mmol) and zinc powder (2.62 g, 40.0 mmol) and the reaction was stirred for 12 h. After work-up, the crude product **S1h** (1.46 g, 10.5 mmol, 53%) was obtained as a colorless oil which was used directly in the next step.

Ketone **S2h** was prepared via **GP2**, using **S1h** (1.46 g, 10.5 mmol) and DMP (5.40 g, 12.7 mmol), K<sub>2</sub>CO<sub>3</sub> (1.47 g, 10.6 mmol), DCM (10 mL) and the reaction was stirred for 3 h. After work-up, the crude product was purified via column chromatography (hexane:ethyl acetate = 7:3) to give **S2h** (747 mg, 5.20 mmol, 52%) as a light yellow oil which was used directly in the next step.

Hydrazone **1h** was prepared via **GP3**, using ketone **S2h** (136 mg, 1.00 mmol), tosylhydrazide (279 mg, 1.50 mmol) and the reaction was stirred for 2 h. After removal of solvents, the crude product was purified via column chromatography (hexane:ethyl acetate = 7:3) to give **1h** (217 mg, 713 μmol, 71%, d.r. = 11:1) as a colorless solid.

**<sup>1</sup>H-NMR (400 MHz, C<sub>6</sub>D<sub>6</sub>):** δ / ppm = 8.09 – 8.04 (m, 2H), 7.95 (s, 1H), 7.01 (dd, *J* = 1.5, 0.8 Hz, 1H), 6.88 (dd, *J* = 1.9, 1.4 Hz, 1H), 6.78 – 6.74 (m, 2H), 6.73 (dd, *J* = 1.9, 0.8 Hz, 1H), 5.17 (ddt, *J* = 17.3, 10.3, 5.5 Hz, 1H), 4.66 (dtd, *J* = 10.2, 1.8, 1.2 Hz, 1H), 4.58 (dtd, *J* = 17.3, 1.9, 1.2 Hz, 1H), 2.51 (dt, *J* = 5.5, 1.9 Hz, 2H), 1.81 (p, *J* = 0.4 Hz, 3H).

**<sup>13</sup>C-NMR (101 MHz, C<sub>6</sub>D<sub>6</sub>):** δ / ppm = 147.0, 144.0, 143.8, 142.4, 136.7, 130.1, 129.6, 128.5, 126.1, 117.4, 108.5, 32.4, 21.1.

**IR (Diamond-ATR, neat):**  $\tilde{\nu}$  / cm<sup>-1</sup> = 3204 (broad), 2924, 1676, 1597, 1513, 1447, 1382, 1331, 1161, 1090, 1037, 923, 873, 812, 743, 706, 667, 596, 550.

**MS (ESI):** *m/z* (%) = 305 (100), 149 (25), 135 (12).

**HRMS (ESI) for C<sub>15</sub>H<sub>17</sub>N<sub>2</sub>O<sub>3</sub>S (305.0954):** 305.0953 (M+H)<sup>+</sup>.

**M.p. (°C):** 115–119.

**N'-(1-(Furan-3-yl)but-3-en-1-ylidene)-4-nitrobenzenesulfonohydrazide (1i)**

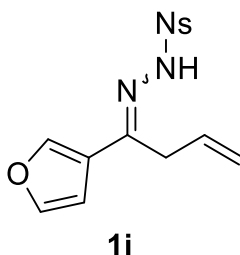

Hydrazone **1i** was prepared via **GP3**, using ketone **S2i** (136 mg, 1.00 mmol), nosylhydrazide (326 mg, 1.50 mmol) and the reaction was stirred for 3 h. After removal of solvents, the crude product was purified via column chromatography (hexane:ethyl acetate = 7:3) to give **1i** (175 mg, 522  $\mu$ mol, 52%, d.r. = >20:1) as a colorless solid. **1i** dissolves poorly in  $C_6D_6$  and decomposes rapidly in  $CDCl_3$  and  $CD_2Cl_2$ .

**$^1H$ -NMR (400 MHz,  $C_6D_6$ ):**  $\delta$  / ppm = 7.75 (d,  $J$  = 8.7 Hz, 2H), 7.57 – 7.50 (m, 2H), 7.45 (s, 2H), 6.98 (d,  $J$  = 1.4 Hz, 1H), 6.89 (d,  $J$  = 1.7 Hz, 1H), 6.59 (d,  $J$  = 1.8 Hz, 1H), 5.02 (ddt,  $J$  = 16.2, 10.7, 5.5 Hz, 1H), 4.59 (dd,  $J$  = 10.2, 1.9 Hz, 1H), 4.48 – 4.39 (m, 1H), 2.33 (dd,  $J$  = 5.0, 2.4 Hz, 2H).

**$^{13}C$ -NMR (101 MHz,  $C_6D_6$ ):**  $\delta$  / ppm = 148.3, 144.4, 144.1, 142.8, 129.9, 129.2, 123.9, 117.6, 108.1, 32.4.

**IR (Diamond-ATR, neat):**  $\tilde{\nu}$  /  $cm^{-1}$  = 3216, 2925, 1607, 1529, 1404, 1349, 1312, 1172, 1088, 1027, 873, 855, 811, 738, 684, 606, 596.

**MS (ESI):**  $m/z$  (%) = 322 (36), 223 (23), 194 (44), 159 (100).

**HRMS (ESI) for  $C_{14}H_{13}N_3NaO_5S$  (358.0468):** 358.0471 ( $M+Na$ ) $^+$ .

**M.p. ( $^{\circ}C$ ):** 150–153 (decomposition).

***N'*-(2,2-Dimethylhex-5-en-3-ylidene)-4-methylbenzenesulfonohydrazide (1j)**

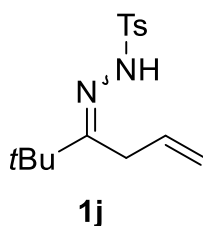

Alcohol **S1j** was prepared via **GP1**, using pivaldehyde (2.42 g, 22.3 mmol), allyl bromide (3.46 mL, 40.0 mmol) and zinc powder (2.62 g, 40.0 mmol) and the reaction was stirred for 12 h. After work-up, the crude product **S1j** (1.72 g, 13.4 mmol, 60%) was obtained as a colorless oil which was used directly in the next step.

Ketone **S2j** was prepared via **GP2**, using **S1j** (1.72 g, 13.4 mmol) and DMP (8.5 g, 20.0 mmol) and the reaction was stirred for 90 min. After work-up, the crude product was purified via column chromatography (hexane:ethyl acetate = 9:1) to give **S2j** (801 mg, 6.35 mmol, 47%) as a colorless oil which was used directly in the next step.

Hydrazone **1j** was prepared via **GP3**, using ketone **S2j** (252 mg, 2.00 mmol), tosylhydrazide (559 mg, 3.00 mmol) and the reaction was stirred for 5 h. After removal of solvents, the crude product was purified via column chromatography (hexane:ethyl acetate = 8.5:1.5) to give **1j** (152 mg, 516  $\mu$ mol, 26%, d.r. = >20:1) as a colorless solid.

**<sup>1</sup>H-NMR (400 MHz, CDCl<sub>3</sub>):**  $\delta$  / ppm = 7.83 – 7.77 (m, 2H), 7.37 (s, 1H), 7.32 – 7.27 (m, 2H), 5.66 (ddt,  $J$  = 17.5, 10.4, 5.2 Hz, 1H), 5.04 (dq,  $J$  = 10.5, 1.3 Hz, 1H), 4.67 – 4.58 (m, 1H), 2.98 (dt,  $J$  = 5.2, 2.0 Hz, 2H), 2.43 (s, 3H), 1.04 (s, 9H).

The spectra are in agreement with the literature.<sup>5</sup>

## **N'-(1-Cyclopropylbut-3-en-1-ylidene)-4-methylbenzenesulfonohydrazide (1k)**

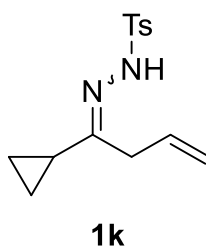

Alcohol **S1k** was prepared via **GP1**, using cyclopropylcarboxaldehyde (1.49 mL, 20.0 mmol), allyl bromide (3.46 mL, 40.0 mmol) and zinc powder (2.62 g, 40.0 mmol) and the reaction was stirred for 12 h. After work-up, the crude product **S1k** (2.10 g, 18.7 mmol, 94%) was obtained as a colorless oil which was used directly in the next step.

Ketone **S2k** was prepared via **GP2**, using **S1k** (1.99 g, 17.7 mmol) and DMP (10.5 g, 24.8 mmol) and the reaction was stirred for 60 min. After work-up, the crude product was purified via column chromatography (hexane:ethyl acetate = 8:2) to give **S2k** (850 mg, 7.72 mmol, 43%) as a colorless volatile liquid which was used directly in the next step.

**<sup>1</sup>H-NMR (400 MHz, CDCl<sub>3</sub>):**  $\delta$  / ppm = 5.97 (ddtd,  $J$  = 17.2, 10.3, 6.9, 0.8 Hz, 1H), 5.15 (q,  $J$  = 1.6 Hz, 2H), 3.32 (dt,  $J$  = 6.9, 1.4 Hz, 2H), 1.97 (tdd,  $J$  = 7.8, 5.0, 4.2 Hz, 1H), 1.08 – 1.00 (m, 2H), 0.93 – 0.84 (m, 2H).

**<sup>13</sup>C-NMR (101 MHz, CDCl<sub>3</sub>):**  $\delta$  / ppm = 208.8, 130.9, 118.8, 48.5, 20.2, 11.1.

**IR (Diamond-ATR, neat):**  $\tilde{\nu}$  / cm<sup>-1</sup> = 2931, 2840, 1727, 1295, 1250, 1045, 718.

**MS (ESI):**  $m/z$  (%) = 128 (5), 104 (100).

**HRMS (ESI) for C<sub>7</sub>H<sub>14</sub>NOS (128.1070):** 128.1070 (M<sup>+</sup>+H<sup>+</sup>).

Hydrazone **1k** was prepared via **GP3**, using ketone **S2k** (165 mg, 1.50 mmol), tosylhydrazide (419 mg, 2.25 mmol) and the reaction was stirred for 3.5 h. After removal of solvents, the crude product was purified via column chromatography (hexane:ethyl acetate = 8:2) to give **1k** (186 mg, 668  $\mu$ mol, 45%, d.r. = 10:1) as a colorless oil. Hydrazone **1k** decomposes rapidly and needs to be used directly for the cyclization reaction.

**<sup>1</sup>H-NMR (400 MHz, C<sub>6</sub>D<sub>6</sub>):**  $\delta$  / ppm = 8.01 – 7.96 (m, 2H), 7.26 (s, 1H), 6.78 – 6.72 (m, 2H), 5.14 (ddt,  $J$  = 17.4, 10.3, 5.7 Hz, 1H), 4.70 (dq,  $J$  = 10.2, 1.6 Hz, 1H), 4.58 (dq,  $J$  = 17.3, 1.8 Hz, 1H), 2.16 (dt,  $J$  = 5.8, 1.9 Hz, 2H), 1.82 (s, 3H), 1.11 (tt,  $J$  = 8.2, 5.0 Hz, 1H), 0.60 – 0.52 (m, 2H), 0.36 – 0.28 (m, 2H).

**MS (ESI):**  $m/z$  (%) = 279 (100), 177 (24), 150 (30).

**HRMS (ESI) for C<sub>14</sub>H<sub>19</sub>N<sub>2</sub>O<sub>2</sub>S** (279.1162): 279.1159 (M<sup>+</sup>+H<sup>+</sup>).

***N'*-(1-(Cyclohex-3-en-1-yl)but-3-en-1-ylidene)-4-methylbenzenesulfonylhydrazide (1I)**

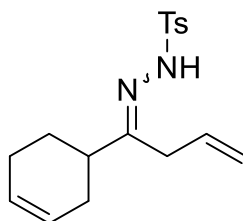

**1I**

Alcohol **S1I** was prepared via **GP1**, using cyclohex-3-ene-1-carbaldehyde (2.34 mL, 20.0 mmol), allyl bromide (3.46 mL, 40.0 mmol) and zinc powder (2.62 g, 40.0 mmol) and the reaction was stirred for 7.5 h. After work-up, the crude product **S1I** (2.64 g, 17.4 mmol, 87%) was obtained as a colorless oil which was used directly in the next step.

Ketone **S2I** was prepared via **GP2**, using **S1I** (2.64 g, 17.4 mmol) and DMP (8.85 g, 20.9 mmol) and the reaction was stirred for 2 h. After work-up, the crude product was purified via column chromatography (hexane:ethyl acetate = 9:1) to give **S2I** (2.01 g, 13.4 mmol, 77%) as a light yellow oil which was used directly in the next step.

Hydrazone **1I** was prepared via **GP3**, using ketone **S2I** (600 mg, 4.00 mmol), tosylhydrazide (1.12 g, 6.00 mmol) and the reaction was stirred for 12 h. After removal of solvents, the crude product was purified via column chromatography (hexane:ethyl acetate = 8:2) and recrystallized from hexane/ethyl acetate to give **1I** (754 mg, 2.96 mmol, 71%, d.r. = 7:1) as a colorless solid.

**<sup>1</sup>H-NMR (400 MHz, C<sub>6</sub>D<sub>6</sub>):**  $\delta$  / ppm = 8.04 (d,  $J$  = 8.3 Hz, 2H), 7.83 (s, 1H), 6.84 – 6.73 (m, 2H), 5.61 – 5.51 (m, 2H), 5.23 (ddt,  $J$  = 17.3, 10.2, 5.6 Hz, 1H), 4.74 (dq,  $J$  = 10.3, 1.6 Hz, 1H), 4.58 (dq,  $J$  = 17.4, 1.8 Hz, 1H), 2.40 (dt,  $J$  = 5.6, 1.9 Hz, 2H), 2.16 – 1.94 (m, 2H), 1.91 – 1.75 (m, 6H), 1.60 (ddd,  $J$  = 12.9, 5.2, 2.4 Hz, 1H), 1.43 – 1.24 (m, 1H).

**<sup>13</sup>C-NMR (101 MHz, C<sub>6</sub>D<sub>6</sub>):**  $\delta$  / ppm = 159.4, 143.5, 136.9, 130.5, 129.5, 128.7, 126.7, 126.1, 117.4, 42.0, 33.1, 28.8, 26.3, 25.5, 21.2.

**IR (Diamond-ATR, neat):**  $\tilde{\nu}$  / cm<sup>-1</sup> = 3221, 3023, 2921, 2838, 1598, 1336, 1164, 859, 812, 665, 548.

**MS (ESI):**  $m/z$  (%) = 319 (100), 164 (10), 163 (25), 149 (12).

**HRMS (ESI) for  $C_{17}H_{23}N_2O_2S$**  (319.1475): 319.1474 ( $M+H$ )<sup>+</sup>.

**M.p. (°C):** 120–121.

**4-Methyl-*N'*-((*E*)-5-methylhepta-1,5-dien-4-ylidene)benzenesulfonohydrazide (1m)**

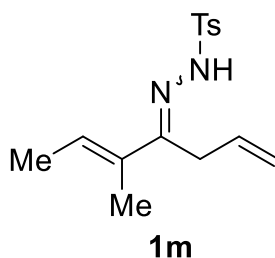

Alcohol **S1m** was prepared via **GP1**, using tiglic aldehyde (1.93 g, 20.0 mmol), allyl bromide (3.46 mL, 40.0 mmol) and zinc powder (2.62 g, 40.0 mmol) and the reaction was stirred for 12 h. After work-up, the crude product **S1m** was obtained as a colorless oil which was used directly in the next step.

Ketone **S2m** was prepared via **GP2**, using **S1m** and DMP (8.31 g, 19.6 mmol) and the reaction was stirred for 90 min. After work-up, the crude product was purified via column chromatography (hexane:ethyl acetate = 9:1) to give **S2m** (334 mg, 2.67 mmol, 13%) as a colorless oil which was used directly in the next step.

Hydrazone **1m** was prepared via **GP3**, using ketone **S2m** (334 mg, 2.67 mmol), tosylhydrazide (745 mg, 4.00 mmol) and the reaction was stirred for 4.5 h. After removal of solvents, the crude product was purified via column chromatography (hexane:ethyl acetate = 8:2) to give **1m** (135 mg, 462  $\mu$ mol, 18%, d.r. = 12:1) as a colorless solid.

**$^1H$ -NMR (400 MHz,  $C_6D_6$ ):**  $\delta$  / ppm = 8.07 – 8.00 (m, 2H), 7.72 (s, 1H), 6.77 (d,  $J$  = 8.0 Hz, 2H), 5.50 (dddd,  $J$  = 8.3, 6.9, 5.6, 1.4 Hz, 1H), 5.23 (ddt,  $J$  = 17.4, 10.3, 5.2 Hz, 1H), 4.69 (dq,  $J$  = 10.3, 1.7 Hz, 1H), 4.51 (dq,  $J$  = 17.3, 1.8 Hz, 1H), 2.61 (dt,  $J$  = 5.2, 2.0 Hz, 2H), 1.88 – 1.85 (m, 3H), 1.82 (s, 3H), 1.37 (dd,  $J$  = 6.8, 1.2 Hz, 3H).

**$^{13}C$ -NMR (101 MHz,  $C_6D_6$ ):**  $\delta$  / ppm = 154.7, 143.6, 136.8, 135.3, 131.1, 129.5, 128.6, 127.8, 116.7, 29.8, 21.1, 14.2, 12.5.

**IR (Diamond-ATR, neat):**  $\tilde{\nu}$  /  $cm^{-1}$  = 3225, 2900, 1600, 1400, 1350, 1150, 1100, 1075, 925, 675, 550.

**MS (ESI):**  $m/z$  (%) = 293 (100), 227 (16), 212 (11), 177 (33), 138 (16), 137 (38), 123 (15).

**HRMS (ESI) for  $C_{15}H_{21}N_2O_2S$**  (293.1318): 293.1318 ( $M+H$ )<sup>+</sup>.

**M.p. (°C):** 97–99.

***N'*-(1,4-Diphenylbut-3-en-1-ylidene)-4-methylbenzenesulfonylhydrazide (1n)**

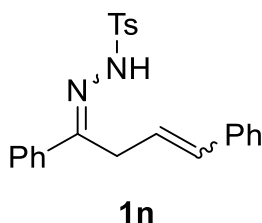

Ketone **S2n** was prepared according to a literature protocol.<sup>6</sup> Acetophenone (1.17 mL, 10.0 mmol), phenylacetylene (1.10 mL, 10.0 mmol) and KO<sup>t</sup>Bu (1.12 g, 10.0 mmol) were dissolved in DMSO (24 mL) and reaction stirred at 100 °C for 1 h. After cooling to 25 °C, the mixture was diluted with H<sub>2</sub>O (25 mL) and a sat. aq. NH<sub>4</sub>Cl solution (ca 200 mL) was added until a pH of 7 was reached. The mixture was extracted with ethyl acetate (3x100 mL) and the combined organic extracts were washed with H<sub>2</sub>O (100 mL). After drying over MgSO<sub>4</sub>, filtering and removal of solvent, the crude product was purified by flash column chromatography using silica gel (hexane:ethyl acetate = 95:5) to give **S2n** (1.10 g, 4.95 mmol, 50%, d.r. = 12:1) as a yellow solid.

**<sup>1</sup>H NMR (400 MHz, CDCl<sub>3</sub>)** δ 8.05 – 7.99 (m, 1H), 7.97 – 7.88 (m, 2H), 7.62 – 7.53 (m, 2H), 7.52 – 7.42 (m, 3H), 7.42 – 7.34 (m, 3H), 7.34 – 7.26 (m, 3H), 7.25 – 7.19 (m, 1H), 6.73 (dd,  $J$  = 11.6, 1.9 Hz, 1H), 6.60 – 6.44 (m, 1H), 6.07 (d,  $J$  = 11.6 Hz, 1H), 4.01 (dd,  $J$  = 7.1, 1.8 Hz, 2H), 3.92 (dd,  $J$  = 6.4, 0.9 Hz, 1H).

The spectrum is in agreement with the literature.<sup>6</sup>

Hydrazone **1n** was prepared via **GP3**, using ketone **S2n** (391 mg, 1.76 mmol), tosylhydrazide (491 mg, 2.64 mmol) and the reaction was stirred for 5 h. After filtration **1n** (425 mg, 1.09 mmol, 62%) was obtained as a colorless solid (d.r. = > 10.1).

<sup>6</sup> Trofimov, B. A.; Schmidt, E. Y.; Zorina, N. V.; Ivanova, E. V.; Ushakov, I. A. *J. Org. Chem.* **2012**, *77*, 6880-6886.



**<sup>1</sup>H-NMR (400 MHz, C<sub>6</sub>D<sub>6</sub>):** δ / ppm = 8.38 (s, 1H), 8.04 – 7.95 (m, 2H), 7.72 – 7.64 (m, 2H), 7.13 – 6.96 (m, 6H), 6.88 – 6.81 (m, 2H), 6.63 – 6.55 (m, 2H), 5.97 (dt, J = 16.1, 2.0 Hz, 1H), 5.69 (dt, J = 16.2, 5.4 Hz, 1H), 2.96 (dd, J = 5.4, 2.0 Hz, 2H), 1.77 (s, 3H).

**<sup>13</sup>C-NMR (101 MHz, C<sub>6</sub>D<sub>6</sub>):** δ / ppm = 152.5, 143.6, 137.5, 136.8, 136.7, 132.0, 129.8, 129.7, 129.6, 129.5, 128.7, 128.6, 128.3, 126.7, 121.8, 30.5, 21.1.

**IR (Diamond-ATR, neat):**  $\tilde{\nu}$  / cm<sup>-1</sup> = 3218, 3060, 1736, 1598, 1494, 1447, 1343, 1167, 1085, 903, 814, 760, 694, 669, 591, 550

**MS (ESI):** m/z (%) = 413 (55), 371 (75), 322 (53), 194 (65), 159 (25), 142 (53).

**HRMS (ESI) for C<sub>23</sub>H<sub>22</sub>N<sub>2</sub>NaO<sub>2</sub>S (413.1294):** 413.1295 (M+Na)<sup>+</sup>.

**M.p. (°C):** 142–144.

**N'-(1-(3,5-Dimethylphenyl)-2,2-dimethylbut-3-en-1-ylidene)-4-methylbenzenesulfonohydrazide (1o)**

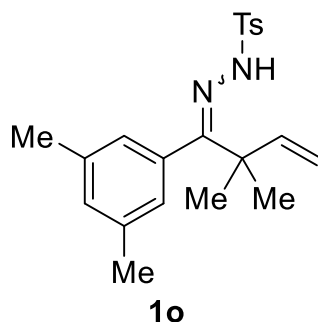

Alcohol **S1o** was prepared via **GP1**, using 3,5-dimethylbenzaldehyde (1.34 g, 10.0 mmol), 1-bromo-3-methylbut-2-ene (2.31 mL, 20.0 mmol) and zinc powder (1.31 g, 20.0 mmol) and the reaction was stirred for 22 h. After work-up, the crude product was purified via column chromatography (hexane:ethyl acetate = 9.5:1) to give **S1o** (1.73 g, 8.50 mmol, 85%) as a colorless oil which was used directly in the next step.

Ketone **S2o** was prepared via **GP2**, using **S1o** (1.73 g, 8.50 mmol) and DMP (4.32 g, 10.2 mmol) and the reaction was stirred for 3 h. After work-up, the crude product was purified via column chromatography (hexane:ethyl acetate = 9:1) to give **S2o** (1.48 g, 7.32 mmol, 86%) as a colorless oil which was used directly in the next step.

Hydrazone **1o** was prepared via **GP3**, using ketone **S2o** (174 mg, 1.00 mmol), tosylhydrazide (280 mg, 1.50 mmol), and *para*-toluenesulfonic acid (38 mg, 0.20 mmol) and the reaction was stirred for 9 h. After filtration and washing with cold MeOH, hydrazone **1o** (204 mg, 550 μmol, 55%, d.r. = >20:1) was obtained as a colorless solid.

**<sup>1</sup>H-NMR (400 MHz, CDCl<sub>3</sub>):** δ / ppm = 7.81 – 7.73 (m, 2H), 7.37 – 7.29 (m, 2H), 7.02 – 6.95 (m, 2H), 6.35 (dt, *J* = 1.5, 0.7 Hz, 2H), 5.74 (dd, *J* = 17.4, 10.6 Hz, 1H), 4.95 (dd, *J* = 10.6, 1.0 Hz, 1H), 4.85 (dd, *J* = 17.4, 1.1 Hz, 1H), 2.46 (s, 3H), 2.27 (d, *J* = 0.8 Hz, 6H), 1.15 (s, 6H).

**<sup>13</sup>C-NMR (101 MHz, CDCl<sub>3</sub>):** δ / ppm = 163.9, 144.2, 144.0, 139.0, 135.6, 131.5, 131.1, 129.5, 128.1, 125.2, 113.0, 44.5, 25.4, 21.8, 21.5.

**IR (Diamond-ATR, neat):**  $\tilde{\nu}$  / cm<sup>-1</sup> = 3210, 2971, 2916, 1865, 1597, 1371, 1341, 1167, 1019, 809, 676, 548, 564.

**MS (ESI):** *m/z* (%) = 371 (100), 295 (36), 177 (37), 159 (12).

**HRMS (ESI) for C<sub>21</sub>H<sub>27</sub>N<sub>2</sub>O<sub>2</sub>S (371.1795):** 371.1790 (M+H)<sup>+</sup>.

**M.p. (°C):** 139–140.

#### 4-Nitro-*N'*-(1-phenylbut-3-en-1-ylidene)benzenesulfonylhydrazide (**1p**)

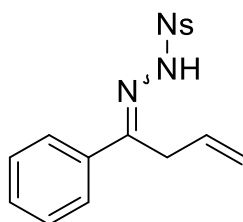

**1p**

Hydrazone **1p** was prepared via **GP3**, using ketone **S2a** (126 mg, 860 μmol), nosylhydrazide (280 mg, 1.50 mmol) and the reaction was stirred for 3 h. After removal of solvents, the crude product was purified via column chromatography (hexane:ethyl acetate = 8:2) to give **1p** (164 mg, 475 μmol, 55%, d.r. = >20:1) as a light yellow solid.

**<sup>1</sup>H-NMR (500 MHz, C<sub>6</sub>D<sub>6</sub>):** δ / ppm = 7.79 – 7.75 (m, 2H), 7.71 – 7.65 (m, 1H), 7.52 – 7.46 (m, 4H), 7.10 – 7.02 (m, 3H), 5.17 (ddt, *J* = 17.4, 10.4, 5.2 Hz, 1H), 4.61 (dtd, *J* = 10.3, 1.9, 1.0 Hz, 1H), 4.46 (dtd, *J* = 17.4, 2.1, 1.0 Hz, 1H), 2.63 (dt, *J* = 5.2, 2.0 Hz, 2H).

**<sup>13</sup>C-NMR (126 MHz, C<sub>6</sub>D<sub>6</sub>):** δ / ppm = 153.8, 150.3, 144.1, 136.8, 130.2, 130.0, 129.2, 128.8, 126.6, 124.0, 117.3, 31.5.

**IR (Diamond-ATR, neat):**  $\tilde{\nu}$  / cm<sup>-1</sup> = 3207, 3070, 2853, 1608, 131, 1349, 1178, 1008, 760, 595.

**MS (ESI):** *m/z* (%) = 368 (100), 346 (37), 173 (19).

**HRMS (ESI) for C<sub>16</sub>H<sub>15</sub>N<sub>3</sub>O<sub>4</sub>SNa (368.0675):** 368.0675 (M+Na)<sup>+</sup>.

**M.p. (°C):** 128–130.

**Methyl 4-(1-(2-((4-nitrophenyl)sulfonyl)hydrazineylidene)but-3-en-1-yl)benzoate (1q)**

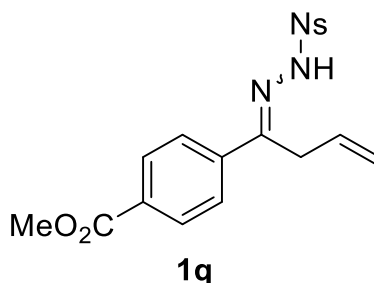

Hydrazone **1q** was prepared via **GP3**, using ketone **S2c** (204 mg, 1.00 mmol), nosylhydrazide (326 mg, 1.50 mmol) and the reaction was stirred for 2 h. After removal of solvents, the crude product was purified via column chromatography (hexane:ethyl acetate = 7:3) to give **1q** (191 mg, 473 μmol, 47%, d.r. = >20:1) as a light yellow solid.

**<sup>1</sup>H-NMR (400 MHz, C<sub>6</sub>D<sub>6</sub>):** δ / ppm = 8.09 – 8.04 (m, 2H), 7.97 (s, 1H), 7.81 – 7.77 (m, 2H), 7.57 – 7.53 (m, 2H), 7.52 – 7.47 (m, 2H), 5.19 (ddt, *J* = 17.4, 10.3, 5.2 Hz, 1H), 4.67 – 4.63 (m, 1H), 4.47 (dtd, *J* = 17.3, 2.0, 0.9 Hz, 1H), 3.46 (s, 3H), 2.64 (dt, *J* = 5.2, 2.0 Hz, 2H).

**<sup>13</sup>C-NMR (101 MHz, C<sub>6</sub>D<sub>6</sub>):** δ / ppm = 166.1, 152.7, 150.4, 143.9, 140.6, 131.9, 130.1, 129.7, 129.2, 126.6, 124.1, 117.5, 51.9, 31.3.

**IR (Diamond-ATR, neat):**  $\tilde{\nu}$  / cm<sup>-1</sup> = 3214, 3106, 2954, 1720, 1607, 1530, 1437, 1405, 1349, 1280, 1174, 1110, 1013, 855, 738, 684, 606.

**MS (ESI):** *m/z* (%) = 426 (20), 160 (10), 159 (100), 158 (10), 144 (12).

**HRMS (ESI) for C<sub>18</sub>H<sub>17</sub>N<sub>3</sub>NaO<sub>6</sub>S (426.0730):** 426.0721 (M+Na)<sup>+</sup>.

**M.p. (°C):** 92–95.

**N'-(1-Phenylbut-3-en-1-ylidene)methanesulfonohydrazide (1r)**

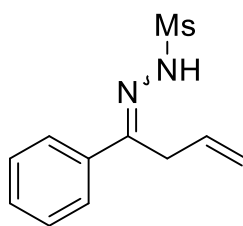

**1r**

Hydrazone **1r** was prepared via **GP3**, using ketone **S2a** (161 mg, 1.10 mmol), mesylhydrazide (175 mg, 1.60 mmol) and the reaction was stirred for 2.25 h. After removal of solvents, the crude product was purified via column chromatography (hexane:ethyl acetate = 7:3) to give **1r** (176 mg, 739  $\mu$ mol, 67%, d.r. = >20:1) as a light yellow solid.

**$^1\text{H-NMR}$  (400 MHz,  $\text{C}_6\text{D}_6$ ):**  $\delta$  / ppm = 7.84 (s, 1H), 7.66 – 7.59 (m, 2H), 7.10 (dd,  $J$  = 5.1, 2.0 Hz, 3H), 5.40 (ddt,  $J$  = 17.4, 10.5, 5.4 Hz, 1H), 4.89 – 4.75 (m, 2H), 2.87 (dt,  $J$  = 5.4, 1.9 Hz, 2H), 2.59 (s, 3H).

**$^{13}\text{C-NMR}$  (101 MHz,  $\text{C}_6\text{D}_6$ ):**  $\delta$  / ppm = 152.8, 137.3, 130.4, 129.8, 128.7, 126.8, 117.5, 38.2, 31.7.

**IR (Diamond-ATR, neat):**  $\tilde{\nu}$  /  $\text{cm}^{-1}$  = 3215, 3025, 2979, 2933, 1683, 1640, 1446, 1389, 1319, 1162, 974, 764, 695, 517.

**MS (ESI):**  $m/z$  (%) = 261 (100), 239 (34), 227 (11), 177 (38), 160 (12), 159 (22), 145 (14), 144 (23).

**HRMS (ESI) for  $\text{C}_{11}\text{H}_{14}\text{N}_2\text{O}_2\text{SNa}$  (261.0668):** 261.0668 ( $\text{M}+\text{Na}$ ) $^+$ .

**M.p. ( $^\circ\text{C}$ ):** 95–97.

#### 4-Methyl-*N'*-(1-phenylpent-4-en-1-ylidene)benzenesulfonohydrazide (**1s**)

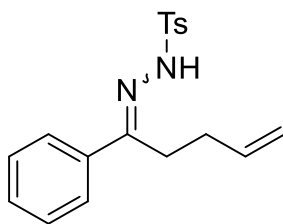

**1s**

Ketone **S2s** was prepared following a literature procedure.<sup>7</sup>

Hydrazone **1s** was prepared via **GP3**, using ketone **S2s** (360 mg, 2.25 mmol), tosylhydrazide (629 mg, 3.38 mmol) and the reaction was stirred for 4 h. After removal of solvents, the crude product was purified via column chromatography (hexane:ethyl acetate = 8:2) to give **1s** (582 mg, 1.72 mmol, 76%, d.r. = 9:1) as a colorless solid.

**<sup>1</sup>H-NMR (400 MHz, CDCl<sub>3</sub>):**  $\delta$  / ppm = 7.94 – 7.88 (m, 3H), 7.66 – 7.29 (m, 6H), 5.69 (ddt,  $J$  = 16.9, 10.1, 6.8 Hz, 1H), 5.05 – 4.85 (m, 2H), 2.73 – 2.53 (m, 2H), 2.44 (d,  $J$  = 11.8 Hz, 3H), 2.22 (tdt,  $J$  = 7.8, 6.6, 1.3 Hz, 2H).

**<sup>13</sup>C-NMR (101 MHz, CDCl<sub>3</sub>):**  $\delta$  / ppm = 157.5, 155.3, 144.3, 144.1, 137.2, 136.3, 136.2, 135.5, 133.2, 130.1, 130.0, 129.8, 129.7, 128.7, 128.6, 128.4, 128.24, 128.17, 128.1, 126.8, 126.5, 117.1, 115.4, 37.5, 30.1, 29.8, 26.4, 21.7.

**IR (Diamond-ATR, neat):**  $\tilde{\nu}$  / cm<sup>-1</sup> = 3217, 2978, 1598, 1575, 1334, 1292, 1166, 916, 668, 612.

**MS (ESI):**  $m/z$  (%) = 329 (100), 296 (31), 251 (14), 223 (16), 194 (11).

**HRMS (ESI) for C<sub>18</sub>H<sub>21</sub>N<sub>2</sub>O<sub>2</sub>S (329.1318):** 329.1315 (M+H)<sup>+</sup>.

**M.p. (°C):** 118–120.

<sup>7</sup> Nicolai, S.; Waser, J. *Org. Lett.* **2011**, *13*, 6324-6327.

**4-Methyl-*N'*-(1-(2-(trifluoromethoxy)phenyl)pent-4-en-1-ylidene)benzenesulfonohydrazide (1t)**

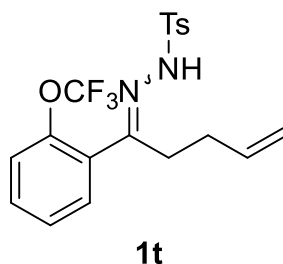

Alcohol **S1t** was prepared by dissolving 2-(trifluoromethoxy)benzaldehyde (1.37 mL, 9.50 mmol) in THF (15 mL) and cooling to  $-15\text{ }^{\circ}\text{C}$ . Then, CuI (180 mg, 950  $\mu\text{mol}$ ) was added, followed by dropwise addition of 3-butenylmagnesium bromide (0.5 M in THF). After slow warming to  $25\text{ }^{\circ}\text{C}$ , the reaction mixture was stirred for 12 h. The reaction mixture was quenched with sat. aq.  $\text{NH}_4\text{Cl}$  (30 mL) and extracted with ethyl acetate (3 x 30 mL). The organic phase was then dried over  $\text{Na}_2\text{SO}_4$ , filtered, and concentrated in vacuo. The crude product was purified by flash column chromatography (hexane:ethyl acetate = 9:1) to give **S1t** (1.54 g, 6.24 mmol, 66%) as a colorless oil which was used directly in the next step.

Ketone **S2t** was prepared via **GP2**, using **S1t** (740 g, 3.00 mmol) and DMP (1.91 g, 4.50 mmol) and the reaction was stirred for 4 h. After work-up, the crude product was purified via column chromatography (hexane:ethyl acetate = 10:0.4) to give **S2t** (692 mg, 2.83 mmol, 94%) as a colorless oil which was used directly in the next step.

Hydrazone **1t** was prepared via **GP3**, using ketone **S2t** (244 mg, 1.00 mmol), tosylhydrazide (279 mg, 1.50 mmol) and the reaction was stirred for 4 h. After removal of solvents, the crude product was purified via column chromatography (hexane:ethyl acetate = 9:1) to give **1t** (330 mg, 800  $\mu\text{mol}$ , 80%, d.r. = 10:1) as a colorless solid.

**$^1\text{H-NMR}$  (500 MHz,  $\text{CDCl}_3$ ):**  $\delta$  / ppm = 8.05 (s, 1H), 7.86 – 7.77 (m, 2H), 7.41 – 7.34 (m, 1H), 7.32 – 7.29 (m, 2H), 7.28 – 7.23 (m, 2H), 7.23 – 7.19 (m, 1H), 5.76 – 5.57 (m, 1H), 4.99 – 4.87 (m, 2H), 2.65 – 2.51 (m, 2H), 2.43 (s,  $J = 0.9\text{ Hz}$ , 3H), 2.10 (dt,  $J = 9.2, 6.6, 1.3\text{ Hz}$ , 2H).

**$^{13}\text{C-NMR}$  (126 MHz,  $\text{CDCl}_3$ ):**  $\delta$  / ppm = 155.0, 152.7, 146.78, 146.77, 144.3, 144.2, 137.1, 136.1, 135.4, 131.7, 131.34, 131.28, 130.5, 129.7, 129.6, 129.3, 128.11, 128.06, 128.0, 126.9, 121.5, 120.31, 120.30, 119.4, 116.7, 115.4, 36.8, 29.8, 29.2, 29.1, 21.7.

**IR (Diamond-ATR, neat):**  $\tilde{\nu}$  /  $\text{cm}^{-1}$  = 3218, 3079, 2956, 1643, 1599, 1493, 1448, 1248, 1217, 1163, 1077, 917, 733, 667, 611.

**MS (ESI):**  $m/z$  (%) = 435 (100), 413 (70), 308 (11), 296 (19), 268 (67), 187 (52), 180 (11), 163 (12), 104 (80).

**HRMS (ESI) for  $C_{19}H_{19}F_3N_2NaO_3S$**  (435.0961): 435.0959 (M+H)<sup>+</sup>.

**M.p. (°C):** 105–107.

***tert*-Butyl 3-(1-(2-tosylhydrazineylidene)pent-4-en-1-yl)-1*H*-indole-1-carboxylate (**1u**)**

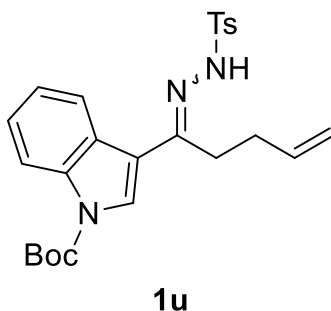

Alcohol **S1u** was prepared by dissolving 1-Boc-3-formylindole (2.33 mL, 9.5 mmol) in THF (15 mL) and cooling to  $-15\text{ }^{\circ}\text{C}$ . Then, CuI (180 mg, 0.95 mmol) was added, followed by dropwise addition of 3-butenylmagnesium bromide (0.5 M in THF). After slow warming to  $25\text{ }^{\circ}\text{C}$ , the reaction mixture was stirred for 12 h. The reaction mixture was quenched with sat. aq.  $\text{NH}_4\text{Cl}$  (30 mL) and extracted with ethyl acetate (3 x 30 mL). The organic phase was then dried over  $\text{Na}_2\text{SO}_4$ , filtered, and concentrated in vacuo. The crude product was purified by flash column chromatography (hexane:ethyl acetate = 9:1) to give **S1u** (2.60 g, 8.63 mmol, 91%) as a colorless oil which was used directly in the next step.

Ketone **S2u** was prepared via **GP2**, using **S1u** (904 g, 3.00 mmol) and DMP (1.91 g, 4.50 mmol) and the reaction was stirred for 2 h. After work-up, the crude product was purified via column chromatography (hexane:ethyl acetate = 10:0.4) to give **S2u** (319 mg, 1.07 mmol, 36%) as a colorless oil which was used directly in the next step.

Hydrazone **1u** was prepared via **GP3**, using ketone **S2u** (160 mg, 534  $\mu\text{mol}$ ), tosylhydrazide (149 mg, 0.80 mmol) and the reaction was stirred for 4 h. After removal of solvents, the crude product was purified via column chromatography (hexane:ethyl acetate = 9:1) to give **1u** (78 mg, 167  $\mu\text{mol}$ , 31%, d.r. = >20:1) as a colorless oil.

**$^1\text{H-NMR}$  (500 MHz,  $\text{CDCl}_3$ ):**  $\delta$  / ppm = 8.30 (ddd,  $J$  = 7.9, 1.4, 0.7 Hz, 1H), 8.09 – 8.04 (m, 2H), 7.99 – 7.93 (m, 2H), 7.76 (s, 1H), 7.37 – 7.27 (m, 4H), 5.76 (ddt,  $J$  = 17.0, 10.1, 6.8 Hz, 1H), 5.05 – 4.96 (m, 2H), 2.71 – 2.64 (m, 2H), 2.38 (s, 3H), 2.32 (tdt,  $J$  = 8.0, 6.8, 1.3 Hz, 2H), 1.68 (s, 9H).

**<sup>13</sup>C-NMR (126 MHz, CDCl<sub>3</sub>):** δ / ppm = 152.4, 149.6, 144.3, 136.3, 135.9, 135.5, 129.8, 128.3, 127.7, 126.7, 125.3, 124.0, 123.7, 118.5, 117.1, 114.9, 84.8, 30.5, 28.3, 27.7, 21.7.

**IR (Diamond-ATR, neat):**  $\tilde{\nu}$  / cm<sup>-1</sup> = 3217, 2979, 1734, 1598, 1558, 1450, 1370, 1336, 1152, 1061, 910, 730, 667.

**MS (ESI):** m/z (%) = 468 (100), 412 (69), 269 (82), 187 (64), 104 (98).

**HRMS (ESI) for C<sub>25</sub>H<sub>30</sub>N<sub>3</sub>O<sub>4</sub>S (468.1952):** 468.1949 (M+H)<sup>+</sup>.

#### 4-Nitro-*N'*-(1-phenylpent-4-en-1-ylidene)benzenesulfonylhydrazide (**1v**)

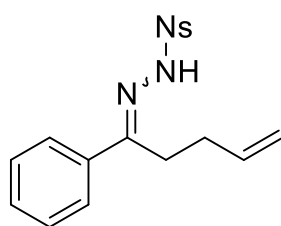

**1v**

Hydrazone **1v** was prepared via **GP3**, using ketone **S2s** (801 mg, 5.00 mmol), nosylhydrazide (1.63 mg, 7.50 mmol) and the reaction was stirred for 2 h. After removal of solvents, the crude product was purified via column chromatography (hexane:ethyl acetate = 8:2) to give **1v** (1.10 g, 3.10 mmol, 61%, d.r. = 3:1) as a yellow solid.

**<sup>1</sup>H-NMR (400 MHz, C<sub>6</sub>D<sub>6</sub>):** δ / ppm = 8.02 (s, 1H), 7.89 – 7.82 (m, 2H), 7.60 – 7.45 (m, 4H), 7.14 – 7.02 (m, 3H), 5.38 (m, J = 1H), 4.76 – 4.66 (m, 2H), 2.13 (dd, J = 8.4, 6.8 Hz, 2H), 1.83 (q, J = 7.5, 7.1 Hz, 2H).

*Note: Peaks of major diastereomer are given.*

**<sup>13</sup>C-NMR (101 MHz, C<sub>6</sub>D<sub>6</sub>):** δ / ppm = 157.6, 156.6, 150.4, 150.3, 144.2, 144.1, 137.0, 136.4, 136.1, 132.6, 130.2, 130.0, 129.7, 129.29, 129.26, 128.8, 126.9, 126.7, 124.0, 123.9, 116.8, 115.7, 37.4, 30.1, 29.9, 26.1.

*Note: Peaks of the diastereomeric mixture are given.*

**IR (Diamond-ATR, neat):**  $\tilde{\nu}$  / cm<sup>-1</sup> = 3225, 3106, 1529, 1349, 1172, 920, 854, 738, 530.

**MS (ESI):** m/z (%) = 382 (100), 360 (84), 338 (26), 329 (34), 309 (22), 251 (25), 223 (28).

**HRMS (ESI) for C<sub>17</sub>H<sub>17</sub>N<sub>3</sub>NaO<sub>4</sub>S (382.0832):** 382.0830 (M+Na)<sup>+</sup>.

**M.p. (°C):** 117–120.



## Starting Material Synthesis (5a–c, 7a and 7b)

### *N'*-(3-Chlorophenyl)(cyclohex-2-en-1-yl)methylene)-4-methylbenzenesulfonohydrazide (5a)

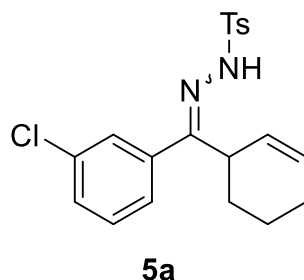

Alcohol **S1-5a** was prepared via **GP1**, using 3-chlorobenzaldehyde (1.13 mL, 10.0 mmol), 3-bromocyclohex-1-ene (2.30 mL, 20.0 mmol) and zinc powder (1.31 g, 20.0 mmol) and the reaction was stirred for 12 h. After work-up, the crude product **S1-5a** (1.15 g, 5.21 mmol, 52%) was obtained as a colorless.

Ketone **S2-5a** was prepared via **GP2**, using **S1-5a** (1.15 g, 5.21 mmol) and DMP (2.21 g, 7.80 mmol) and the reaction was stirred for 2 h. After work-up, the crude product was purified via column chromatography (hexane:ethyl acetate = 9.5:0.5) to give **S2-5a** (970 mg, 4.40 mmol, 84%) as a light yellow oil.

Hydrazone **5a** was prepared via **GP3**, using ketone **S2-5a** (224 mg, 1.00 mmol), tosylhydrazide (279 mg, 1.50 mmol) and the reaction was stirred for 5 h. After removal of solvents, the crude product was purified via column chromatography (hexane:ethyl acetate = 8.5:1.5) using neutral silica to give **5a** (135 mg, 347  $\mu$ mol, 35%, d.r. = 3:1) as a colorless oil.

**<sup>1</sup>H-NMR (400 MHz, C<sub>6</sub>D<sub>6</sub>):**  $\delta$  / ppm = 9.13 (s, 1H), 8.07 – 8.00 (m, 2H), 7.60 (t,  $J$  = 1.9 Hz, 1H), 7.34 (dt,  $J$  = 7.9, 1.4 Hz, 1H), 7.03 (ddd,  $J$  = 8.0, 2.1, 1.0 Hz, 1H), 6.81 – 6.74 (m, 3H), 5.63 (ddt,  $J$  = 9.8, 4.0, 2.5 Hz, 1H), 5.22 – 5.11 (m, 1H), 3.22 (ddq,  $J$  = 9.6, 4.7, 2.6 Hz, 1H), 1.80 (s, 3H), 1.75 – 1.51 (m, 2H), 1.50 – 1.42 (m, 1H), 1.37 (dtd,  $J$  = 10.6, 6.6, 5.3, 2.7 Hz, 2H), 1.30 – 1.01 (m, 1H).

*Note: Peaks of major diastereomer are given.*

**<sup>13</sup>C-NMR (101 MHz, C<sub>6</sub>D<sub>6</sub>):**  $\delta$  / ppm = 157.8, 154.0, 143.9, 143.8, 140.0, 136.70, 136.66, 135.6, 134.6, 134.3, 132.3, 130.8, 129.8, 129.7, 129.6, 129.2, 128.6, 128.5, 127.3, 127.2, 126.5, 125.9, 125.8, 125.2, 43.6, 38.2, 26.6, 25.1, 24.4, 23.7, 21.7, 21.2, 21.1.

*Note: All peaks are given.*

**IR (Diamond-ATR, neat):**  $\tilde{\nu}$  / cm<sup>-1</sup> = 3429, 3203, 2934, 1597, 1564, 1379, 1341, 1167, 1092, 890, 802, 667, 567, 549, 497

**MS (ESI):** m/z (%) = 389 (100), 295 (52), 233 (14), 219 (18), 203 (17), 177 (32).

**HRMS (ESI) for C<sub>20</sub>H<sub>22</sub>ClN<sub>2</sub>O<sub>2</sub>S (389.1085):** 389.1084 (M+H)<sup>+</sup>.

***N'*-(Cyclohex-2-en-1-yl(2-(trifluoromethoxy)phenyl)methylene)-4-methylbenzenesulfonohydrazide (**5b**)**

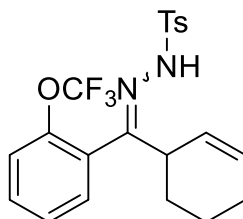

**5b**

Alcohol **S1-5b** was prepared via **GP1**, using 2-(trifluoromethoxy)benzaldehyde (1.43 mL, 10.0 mmol), 3-bromocyclohex-1-ene (2.30 mL, 20.0 mmol) and zinc powder (1.31 g, 20.0 mmol) and the reaction was stirred for 24 h. After work-up, the crude product was purified via column chromatography (hexane:ethyl acetate = 8:2) to give **S1-5b** (1.54 g, 5.70 mmol, 57%) was obtained as a colorless.

Ketone **S2-5b** was prepared via **GP2**, using **S1-8b** (1.54 g, 5.66 mmol) and DMP (2.89 g, 6.81 mmol) and the reaction was stirred for 3 h. After work-up, the crude product was purified via column chromatography (hexane:ethyl acetate = 9:1) to give **S2-5b** (1.31 g, 4.85 mmol, 85%) as a colorless oil.

Hydrazone **5b** was prepared via **GP3**, using ketone **S2-5b** (270 mg, 1.00 mmol), tosylhydrazide (279 mg, 1.50 mmol) and the reaction was stirred for 28 h. After removal of solvents, the crude product was purified via column chromatography (hexane:ethyl acetate = 9:1) using neutral silica and recrystallized from hexane/ethyl acetate to give **5b** (50.0 mg, 114  $\mu$ mol, 11%, d.r. = >20:1) as a colorless solid. **5b** decomposes rapidly and was used in the next step without further delay.

**<sup>1</sup>H-NMR (400 MHz, CDCl<sub>3</sub>):**  $\delta$  / ppm = 9.01 (s, 1H), 7.98 – 7.89 (m, 2H), 7.22 – 7.17 (m, 1H), 6.87 (qq, *J* = 3.3, 1.8 Hz, 1H), 6.79 – 6.73 (m, 2H), 6.70 (dd, *J* = 8.3, 2.0 Hz, 2H), 5.73 – 5.64 (m, 1H), 5.55 (d, *J* = 10.1 Hz, 1H), 3.14 (s, 1H), 1.81 (s, 3H), 1.78 – 1.55 (m, 3H), 1.47 – 1.30 (m, 2H), 1.06 – 0.90 (m, 1H).

**IR (Diamond-ATR, neat):**  $\tilde{\nu}$  / cm<sup>-1</sup> = 3215, 2934, 1599, 1449, 1346, 1253, 1218, 1168, 1085, 924, 814, 765, 668, 556.

**MS (ESI):** *m/z* (%) = 439 (100), 283 (29), 269 (39), 268 (21), 253 (42).

**HRMS (ESI) for C<sub>21</sub>H<sub>22</sub>F<sub>3</sub>N<sub>2</sub>O<sub>3</sub>S (439.1298):** 439.1299 (M+H)<sup>+</sup>.

**M.p. (°C):** 116–117.

**N'-(Cyclohex-2-en-1-yl(phenyl)methylene)-4-methylbenzenesulfonohydrazide (5c)**

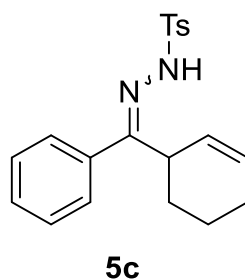

Alcohol **S1-5c** was prepared via **GP1**, using benzaldehyde (1.01 mL, 10.0 mmol), 3-bromocyclohex-1-ene (2.30 mL, 20.0 mmol) and zinc powder (1.31 g, 20.0 mmol) and the reaction was stirred for 12 h. After work-up, the crude product **S1-5c** was obtained as a colorless oil which was used directly in the next step.

Ketone **S2-5c** was prepared via **GP2**, using **S1-5c** and DMP (4.58 g, 10.8 mmol) and the reaction was stirred for 3 h. After work-up, the crude product was purified via column chromatography (hexane:ethyl acetate = 10:0.5) to give **S2-5c** (1.32 g, 7.06 mmol, 71% over two steps) as a colorless oil which was used directly in the next step.

Hydrazone **5c** was prepared via **GP3**, using ketone **S2-5c** (558 mg, 3.00 mmol), tosylhydrazide (838 mg, 4.50 mmol) and the reaction was stirred for 4 h. After removal of solvents, the crude product was purified via column chromatography (hexane:ethyl acetate = 8:2) to give **5c** (481 mg, 1.36 mmol, 45%, d.r. = 1.2:1) as a colorless solid.

**<sup>1</sup>H-NMR (400 MHz, CDCl<sub>3</sub>):**  $\delta$  / ppm = 8.84 (s, 0.5H), 7.88 – 7.75 (m, 2H), 7.60 – 7.51 (m, 1H), 7.49 – 7.27 (m, 5H), 7.23 (s, 0.5H), 7.03 – 6.94 (m, 1H), 6.11 – 5.70 (m, 1H), 5.53 (m, 1H), 3.80 – 3.20 (m, 1H), 2.45–2.41 (2 x s, 3H), 2.29 – 2.11 (m, 1H), 2.00 – 1.45 (m, 5H).

*Note: Peaks of the diastereomeric mixture are given.*

**<sup>13</sup>C-NMR (101 MHz, CDCl<sub>3</sub>):**  $\delta$  / ppm = 155.0, 152.7, 146.8, 146.8, 144.3, 144.2, 137.1, 136.1, 135.4, 131.7, 131.34, 131.28, 130.5, 129.7, 129.6, 129.3, 128.11, 128.06, 128.0, 126.9, 121.5, 120.31, 120.30, 119.4, 116.7, 115.4, 36.8, 29.8, 29.2, 29.1, 21.7.

*Note: Peaks of the diastereomeric mixture are given.*

**IR (Diamond-ATR, neat):**  $\tilde{\nu}$  / cm<sup>-1</sup> = 3208, 2933, 2863, 1597, 1444, 1381, 1337, 1166, 1088, 909, 889, 829, 865, 665.

**MS (ESI):** m/z (%) = 355 (100), 251 (6), 223 (7), 194 (6), 105 (5).

HRMS (ESI) for  $C_{20}H_{23}N_2O_2S$  (355.1475): 355.1470 ( $M^+ + H^+$ ).

M.p. ( $^{\circ}C$ ): 89–91.

***N'*-(2-(Cyclopent-1-en-1-yl)-1-phenylethylidene)-4-methylbenzenesulfonohydrazide (7a)**

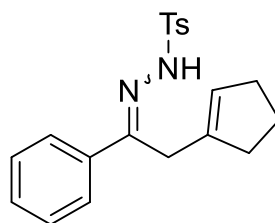

**7a**

Ketone **S2-7a** was prepared according to a literature procedure:<sup>8</sup> 2-(Cyclopent-1-en-1-yl)acetonitrile (1.80 mL, 15 mmol) was dissolved in Et<sub>2</sub>O (90 mL, 0.17 M) and PhMgBr (3.0 M in Et<sub>2</sub>O, 10 mL, 30 mmol) was added dropwise at 25  $^{\circ}C$  followed stirring at 45  $^{\circ}C$  for 3 h. After cooling to 25  $^{\circ}C$ , THF (70 mL) was added and the mixture further cooled to 0  $^{\circ}C$ . The mixture was acidified by addition of 10% aq. HCl (40 mL) and stirred for 16 h at 25  $^{\circ}C$ . The mixture was extracted with EtOAc (40 mL) and washed with sat. aq. NaHCO<sub>3</sub> (2 x 50 mL) and brine (1 x 50 mL). After drying over Mg<sub>2</sub>SO<sub>4</sub>, filtration and concentrated in vacuo, the crude product was purified *via* silica gel flash chromatography (hexane:ethyl acetate = 97:3) to give **S2-7a** (500 mg, 2.70 mmol, 18%) as a yellow oil.

Hydrazone **7a** was prepared via **GP3**, using ketone **S2-7a** (460 mg, 2.47 mmol), tosylhydrazide (690 mg, 3.70 mmol) and the reaction was stirred for 9 h. After filtration, **7a** (413 mg, 1.16 mmol, 47%, d.r. = >20:1) was obtained as a colorless solid.

<sup>1</sup>H-NMR (400 MHz, CDCl<sub>3</sub>):  $\delta$  / ppm = 7.83 (d, J = 8.3 Hz, 2H), 7.68 (s, 1H), 7.64 – 7.59 (m, 2H), 7.39 – 7.32 (m, 3H), 7.30 (d, J = 8.1 Hz, 2H), 5.00 – 4.88 (m, 1H), 3.33 (s, 2H), 2.41 (s, 3H), 2.23 – 2.14 (m, 4H), 1.92 – 1.80 (m, 2H).

The spectrum is in agreement with the literature.<sup>9</sup>

<sup>8</sup> Crotti, P.; Badalassi, F.; Di Bussolo, V.; Favero, L.; Pineschi, M. *Tetrahedron*. **2001**, *57*, 8599-8572.

<sup>9</sup> Miyashi, T.; Nishizawa, Y.; Fujii, Y.; Yamakawa, K.; Kamata, M.; Akao, S.; Mukai, T. *J. Am. Chem. Soc.* **1986**, *108*, 1617-1632.

**N'-(2-(Cyclohex-1-en-1-yl)-1-phenylethylidene)-4-methylbenzenesulfonohydrazide (7b)**

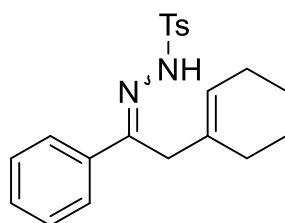

**7b**

Ketone **S2-7b** was prepared according to a literature procedure:<sup>10</sup> 2-(cyclohex-1-en-1-yl)acetonitrile (2.10 mL, 15 mmol) was dissolved in Et<sub>2</sub>O (90 mL, 0.17 M) and PhMgBr (3.0 M in Et<sub>2</sub>O, 10 mL, 30 mmol) was added dropwise at 25 °C followed stirring at 45 °C for 3 h. After cooling to 25 °C, THF (70 mL) was added and the mixture further cooled to 0 °C. The mixture was acidified by addition of 10% aq. HCl (40 mL) and stirred for 16 h at 25 °C. The mixture was extracted with EtOAc (40 mL) and washed with sat. aq. NaHCO<sub>3</sub> (2 x 50 mL) and brine (1 x 50 mL). After drying over Mg<sub>2</sub>SO<sub>4</sub>, filtration and concentrated in vacuo, the crude product was purified *via* silica gel flash chromatography (hexane:ethyl acetate = 97:3) to give **S2-7b** (0.90 g, 4.50 mmol, 30%) as a yellow oil.

Hydrazone **7b** was prepared via **GP3**, using ketone **S2-7a** (460 mg, 2.30 mmol), tosylhydrazide (642 mg, 3.44 mmol) and the reaction was stirred for 16 h. After filtration, **7b** (335 mg, 909 μmol, 40%, d.r. = >20:1) was obtained as a colorless solid.

**<sup>1</sup>H-NMR (400 MHz, C<sub>6</sub>D<sub>6</sub>):** δ / ppm = 8.34 (s, 1H), 8.07 (d, J = 8.3 Hz, 2H), 7.68 (d, J = 6.7 Hz, 2H), 7.13 – 6.99 (m, 3H), 6.73 (d, J = 8.0 Hz, 2H), 5.03 (s, 1H), 2.85 (s, 2H), 1.79 (s, 3H), 1.67 – 1.52 (m, 4H), 1.41 – 1.23 (m, 4H).

**<sup>13</sup>C-NMR (101 MHz, C<sub>6</sub>D<sub>6</sub>):** δ / ppm = 152.8, 143.6, 138.1, 137.0, 131.0, 129.6, 129.5, 128.6, 128.5, 126.7, 123.7, 36.1, 28.6, 25.3, 22.9, 22.2, 21.1.

**IR (Diamond-ATR, neat):**  $\tilde{\nu}$  / cm<sup>-1</sup> = 3218, 2836, 1573, 1348, 1185, 1069, 813, 693, 550.

**MS (ESI):** m/z (%) = 369 (17), 329 (27), 251 (40), 237 (21), 223 (40), 217 (28), 214 (21), 209 (19), 195 (17), 194 (22), 158 (25).

**HRMS (ESI) for C<sub>21</sub>H<sub>25</sub>N<sub>2</sub>O<sub>2</sub>S (369.1631):** 369.1628 (M+H)<sup>+</sup>.

**M.p. (°C):** 130–133.

<sup>10</sup> Crotti, P.; Badalassi, F.; Di Bussolo, V.; Favero, L.; Pineschi, M. *Tetrahedron*. **2001**, *57*, 8599-8572.

## Preparation of Compounds 2a–v, 6a–c, 8a–b

### (3-Phenyl-1-tosyl-4,5-dihydro-1H-pyrazol-5-yl)methanol (**2a**)

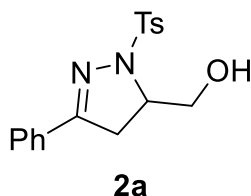

Pyrazoline **2a** was prepared via **GP4**, using hydrazone **1a** (97.0 mg, 308  $\mu\text{mol}$ ) and  $\text{Mn}(\text{dpm})_3$  (18 mg, 30  $\mu\text{mol}$ ), and the reaction was stirred for 2 h. After work-up, the crude product was purified via column chromatography (hexane:ethyl acetate = 6:4,  $R_f$  = 0.3) to give **2a** (79.0 mg, 239  $\mu\text{mol}$ , 78%) as a colorless oil.

#### 4 mmol Scale Reaction:

Pyrazoline **2a** was prepared via **GP4**, using hydrazone **1a** (1.26 g, 4.00 mmol) and  $\text{Mn}(\text{dpm})_3$  (242 mg, 400  $\mu\text{mol}$ ), and the reaction was stirred for 2 h. After work-up, the crude product was purified via column chromatography (hexane:ethyl acetate = 6:4) to give **2a** (800 mg, 2.42 mmol, 61%) as a colorless oil.

#### Reaction under air:

Hydrazone **1a** (34.0 mg, 0.108  $\mu\text{mol}$ ) and  $\text{Mn}(\text{dpm})_3$  (6.0 mg, 10  $\mu\text{mol}$ ) were placed in a flask, dissolved in *i*PrOH (1 mL). Air was continuously introduced to the solution via needle and the reaction stirred at 55 °C for 2 h. When the solvent level was reduced by 0.5 mL, additional *i*PrOH (1 mL) was added. Water was added and the mixture extracted with EtOAc (3 x 30 mL). The organic phase was washed with water (3 x 30 mL) and brine (2 x 30 mL) and submitted to crude  $^1\text{H}$  NMR analysis using 1,3,5-trimethoxybenzene as standard which indicated formation of **2a** (24 mg, 73  $\mu\text{mol}$ , 68%).

$^1\text{H-NMR}$  (400 MHz,  $\text{CDCl}_3$ ):  $\delta$  / ppm = 7.82 – 7.76 (m, 2H), 7.71 – 7.63 (m, 2H), 7.44 – 7.34 (m, 3H), 7.32 – 7.27 (m, 2H), 4.09 (dd,  $J$  = 11.9, 3.2 Hz, 1H), 3.98 (dddd,  $J$  = 11.0, 9.3, 4.1,

3.2 Hz, 1H), 3.88 (dd,  $J = 11.8, 4.1$  Hz, 1H), 3.23 – 3.03 (m, 2H), 2.57 (d,  $J = 19.8$  Hz, 1H), 2.39 (s, 3H).

$^{13}\text{C-NMR}$  (101 MHz,  $\text{CDCl}_3$ ):  $\delta$  / ppm = 158.6, 144.7, 131.7, 130.9, 130.7, 129.8, 128.81, 128.77, 127.1, 64.5, 63.8, 36.7, 21.7.

The spectra are in agreement with the literature.<sup>11</sup>

### (3-(4-Methoxyphenyl)-1-tosyl-4,5-dihydro-1H-pyrazol-5-yl)methanol (**2b**)

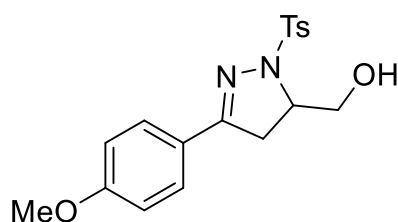

**2b**

Pyrazoline **2b** was prepared via **GP4**, using hydrazone **1b** (20 mg, 58  $\mu\text{mol}$ ) and  $\text{Mn}(\text{dpm})_3$  (3.5 mg, 6.0  $\mu\text{mol}$ ), and the reaction was stirred for 2 h. After work-up, the crude product was purified via column chromatography (hexane:ethyl acetate = 6:4,  $R_f = 0.3$ ) to give **2b** (13 mg, 36  $\mu\text{mol}$ , 62%) as a colorless oil.

$^1\text{H-NMR}$  (400 MHz,  $\text{CDCl}_3$ ):  $\delta$  / ppm = 7.84 – 7.75 (m, 2H), 7.65 – 7.57 (m, 2H), 7.31 – 7.26 (m, 2H), 6.92 – 6.84 (m, 2H), 4.07 (dd,  $J = 11.8, 3.1$  Hz, 1H), 3.95 (dddd,  $J = 10.8, 9.2, 4.2, 3.1$  Hz, 1H), 3.86 (dd,  $J = 11.8, 4.3$  Hz, 1H), 3.83 (s, 3H), 3.16 – 2.99 (m, 2H), 2.39 (s, 3H).

$^{13}\text{C-NMR}$  (101 MHz,  $\text{CDCl}_3$ ):  $\delta$  / ppm = 161.8, 158.3, 144.6, 131.7, 129.7, 128.9, 128.8, 123.3, 114.2, 64.6, 63.6, 55.5, 36.8, 21.7.

The spectra are in agreement with the literature.<sup>11</sup>

<sup>11</sup> Chen, S.; Chen, W.; Chen, X.; Chen, G.; Ackermann, L.; Tian, X. *Org. Lett.* **2019**, *21*, 7787-7790.



**Methyl 4-(5-(hydroxymethyl)-1-tosyl-4,5-dihydro-1H-pyrazol-3-yl)benzoate (2c)**

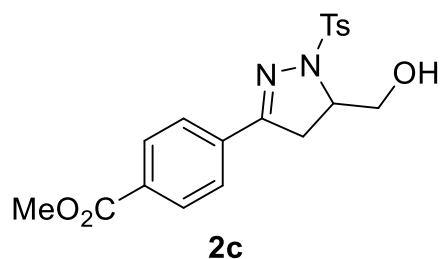

Pyrazoline **2c** was prepared via **GP4**, using hydrazone **1c** (74 mg, 0.20 mmol) and  $\text{Mn}(\text{dpm})_3$  (12 mg, 20  $\mu\text{mol}$ ), and the reaction was stirred for 2 h. After work-up, the crude product was purified via column chromatography (hexane:ethyl acetate = 7:3,  $R_f = 0.25$ ) to give **2c** (51 mg, 0.13 mmol, 66%) as a colorless solid.

**$^1\text{H-NMR}$  (400 MHz,  $\text{CDCl}_3$ ):**  $\delta$  / ppm = 8.03 (d,  $J = 8.5$  Hz, 2H), 7.79 (d,  $J = 8.4$  Hz, 2H), 7.71 (d,  $J = 8.5$  Hz, 2H), 7.32 – 7.28 (m, 2H), 4.12 (dd,  $J = 11.9, 3.2$  Hz, 1H), 4.08 – 3.97 (m, 1H), 3.93 (s, 3H), 3.89 (dd,  $J = 11.9, 3.9$  Hz, 1H), 3.27 – 3.05 (m, 2H), 2.39 (s, 3H), 2.24 (d,  $J = 13.0$  Hz, 1H).

**$^{13}\text{C-NMR}$  (101 MHz,  $\text{CDCl}_3$ ):**  $\delta$  / ppm = 166.5, 157.4, 144.9, 134.7, 131.9, 131.8, 130.0, 129.9, 128.8, 127.0, 64.3, 64.0, 52.5, 36.5, 21.8.

**IR (Diamond-ATR, neat):**  $\tilde{\nu}$  /  $\text{cm}^{-1}$  = 3519 (broad), 2952, 1720, 1597, 1436, 1411, 1354, 1279, 1167, 1109, 1015, 911, 858, 815, 772, 732, 706, 666, 590, 548

**MS (ESI):**  $m/z$  (%) = 389 (100), 235 (12), 234 (93), 203 (49).

**HRMS (ESI) for  $\text{C}_{19}\text{H}_{21}\text{N}_2\text{O}_5\text{S}$  (389.1166):** 389.1163 ( $\text{M}+\text{H}^+$ ).

**M.p. ( $^\circ\text{C}$ ):** 117–119.

**(3-(3-Fluorophenyl)-1-tosyl-4,5-dihydro-1H-pyrazol-5-yl)methanol (2d)**

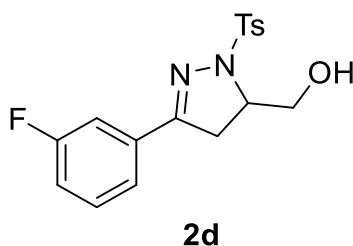

Pyrazoline **2d** was prepared via **GP4**, using hydrazone **1d** (66 mg, 0.20 mmol) and  $\text{Mn}(\text{dpm})_3$  (12 mg, 20  $\mu\text{mol}$ ), and the reaction was stirred for 2 h. After work-up, the crude product was purified via column chromatography (hexane:ethyl acetate = 6:4,  $R_f = 0.3$ ) to give **2d** (55.0 mg, 158  $\mu\text{mol}$ , 79%) as a colorless oil.

**$^1\text{H-NMR}$  (400 MHz,  $\text{CDCl}_3$ ):**  $\delta$  / ppm = 7.85 – 7.75 (m, 2H), 7.42 – 7.27 (m, 5H), 7.10 (tdd,  $J = 8.2, 2.5, 1.3$  Hz, 1H), 4.10 (dd,  $J = 11.9, 3.3$  Hz, 1H), 4.05 – 3.96 (m, 1H), 3.88 (dd,  $J = 11.9, 4.0$  Hz, 1H), 3.21 – 3.01 (m, 2H), 2.39 (s, 3H).

**$^{13}\text{C-NMR}$  (101 MHz,  $\text{CDCl}_3$ ):**  $\delta$  / ppm = 162.8 (d,  $J = 247.0$  Hz), 157.4 (d,  $J = 3.0$  Hz), 144.9, 132.9 (d,  $J = 8.0$  Hz), 131.7, 130.4 (d,  $J = 8.2$  Hz), 129.9, 128.76, 122.9 (d,  $J = 3.0$  Hz), 117.8 (d,  $J = 21.5$  Hz), 113.8 (d,  $J = 23.0$  Hz), 64.3, 63.9, 36.6, 21.8.

**$^{19}\text{F-NMR}$  (376 MHz,  $\text{CDCl}_3$ ):**  $\delta$  / ppm = -112.1.

The spectra are in agreement with the literature.<sup>11</sup>

**(3-(4-Ethylphenyl)-1-tosyl-4,5-dihydro-1H-pyrazol-5-yl)methanol (2e)**

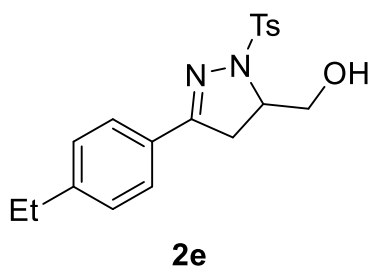

Pyrazoline **2e** was prepared via **GP4**, using hydrazone **1e** (34 mg, 0.10 mmol) and  $\text{Mn}(\text{dpm})_3$  (6.0 mg, 10  $\mu\text{mol}$ ), and the reaction was stirred for 2 h. After work-up, the crude product was purified via column chromatography (hexane:ethyl acetate = 6:4,  $R_f = 0.3$ ) to give **2e** (23 mg, 64  $\mu\text{mol}$ , 64%) as a light-brown solid.

**$^1\text{H-NMR}$  (400 MHz,  $\text{C}_6\text{D}_6$ ):**  $\delta$  / ppm = 7.96 – 7.90 (m, 2H), 7.49 – 7.43 (m, 2H), 6.96 – 6.87 (m, 2H), 6.75 – 6.63 (m, 2H), 3.96 – 3.77 (m, 2H), 3.68 (dt,  $J = 10.5, 4.7$  Hz, 1H), 2.67 – 2.53 (dd,  $J = 9.6$  Hz, 17.3 Hz, 1 H), 2.40 – 2.26 (m, 4H), 1.75 (s, 3H), 1.00 (t,  $J = 7.6$  Hz, 3H).

**$^{13}\text{C-NMR}$  (101 MHz,  $\text{C}_6\text{D}_6$ ):**  $\delta$  / ppm = 158.1, 147.1, 143.9, 133.3, 129.6, 129.1, 129.0, 127.4, 64.6, 64.1, 36.4, 29.0, 21.1, 15.6.

**IR (Diamond-ATR, neat):**  $\tilde{\nu}$  /  $\text{cm}^{-1}$  = 3521, 2964, 2930, 1611, 1353, 1167, 1021, 666, 594, 552.

**MS (ESI):**  $m/z$  (%) = 381 (100), 360 (20), 359 (89), 295 (73), 204 (94), 177 (46).

**HRMS (ESI) for  $\text{C}_{19}\text{H}_{22}\text{N}_2\text{NaO}_3\text{S}$  (381.1243):** 381.1239 ( $\text{M}+\text{Na}$ ) $^+$ .

**M.p. ( $^\circ\text{C}$ ):** 154–155.

**4-(5-(Hydroxymethyl)-1-tosyl-4,5-dihydro-1H-pyrazol-3-yl)benzonitrile (2f)**

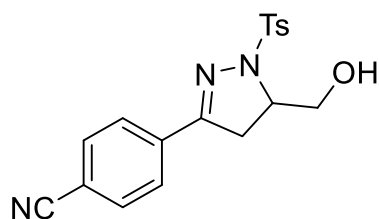

**2f**

Pyrazoline **2f** was prepared via **GP4**, using hydrazone **1f** (34 mg, 0.10 mmol) and  $\text{Mn}(\text{dpm})_3$  (6.0 mg, 10  $\mu\text{mol}$ ), and the reaction was stirred for 2 h. After work-up, the crude product was purified via column chromatography (hexane:ethyl acetate = 6:4,  $R_f$  = 0.3) to give **2f** (28 mg, 80  $\mu\text{mol}$ , 80%) as a colorless oil.

**$^1\text{H-NMR}$  (400 MHz,  $\text{CDCl}_3$ ):**  $\delta$  / ppm = 7.82 – 7.71 (m, 4H), 7.70 – 7.62 (m, 2H), 7.31 (d,  $J$  = 8.1 Hz, 2H), 4.18 – 4.10 (m, 1H), 4.06 (ddt,  $J$  = 11.3, 9.4, 3.5 Hz, 1H), 3.88 (ddd,  $J$  = 11.2, 6.5, 3.5 Hz, 1H), 3.25 – 3.05 (m, 2H), 2.50 (t,  $J$  = 6.6 Hz, 1H), 2.40 (s, 3H).

**$^{13}\text{C-NMR}$  (101 MHz,  $\text{CDCl}_3$ ):**  $\delta$  / ppm = 156.4, 145.1, 134.9, 132.5, 131.8, 129.9, 128.7, 127.5, 118.3, 114.1, 64.18, 64.15, 36.2, 21.8.

**IR (Diamond-ATR, neat):**  $\tilde{\nu}$  /  $\text{cm}^{-1}$  = 3513, 1596, 1354, 1167, 1093, 1012, 667, 590.

**MS (ESI):**  $m/z$  (%) = 356 (100), 201 (67), 184 (23), 170 (46).

**HRMS (ESI) for  $\text{C}_{18}\text{H}_{18}\text{N}_3\text{O}_3\text{S}$  (356.1063):** 356.1060 ( $\text{M}+\text{H}$ ) $^+$ .

**(5-Methyl-3-(thiophen-2-yl)-1-tosyl-4,5-dihydro-1H-pyrazol-5-yl)methanol (2g)**

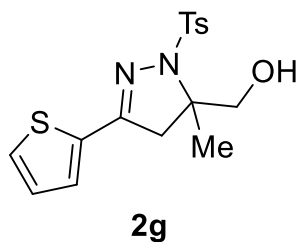

Pyrazoline **2g** was prepared via **GP4**, using hydrazone **1g** (34.0 mg, 102  $\mu$ mol) and  $\text{Mn}(\text{dpm})_3$  (6.0 mg, 10  $\mu$ mol), and the reaction was stirred for 2 h. After work-up, the crude product was purified via column chromatography (hexane:ethyl acetate = 6:4,  $R_f$  = 0.35) to give **2g** (23.0 mg, 65.6  $\mu$ mol, 64%) as a colorless oil.

**$^1\text{H-NMR}$  (400 MHz,  $\text{CDCl}_3$ ):**  $\delta$  / ppm = 7.94 – 7.89 (m, 2H), 7.48 (dd,  $J$  = 5.1, 1.3 Hz, 1H), 7.42 (dd,  $J$  = 2.9, 1.3 Hz, 1H), 7.34 – 7.27 (m, 3H), 4.15 (d,  $J$  = 12.1 Hz, 1H), 3.66 (d,  $J$  = 12.1 Hz, 1H), 3.47 (d,  $J$  = 16.6 Hz, 1H), 2.85 (d,  $J$  = 16.6 Hz, 1H), 2.41 (s, 3H), 1.37 (s, 3H).

**$^{13}\text{C-NMR}$  (101 MHz,  $\text{CDCl}_3$ ):**  $\delta$  / ppm = 150.9, 144.1, 136.8, 133.9, 129.6, 128.2, 126.7, 125.9, 73.1, 68.0, 45.6, 21.7, 21.5.

**IR (Diamond-ATR, neat):**  $\tilde{\nu}$  /  $\text{cm}^{-1}$  = 3530, 2924, 1598, 1357, 1327, 1163, 1038, 784, 660, 593.

**MS (ESI):**  $m/z$  (%) = 351 (82), 333 (12), 197 (11), 196 (100), 165 (53).

**HRMS (ESI) for  $\text{C}_{16}\text{H}_{19}\text{N}_2\text{O}_3\text{S}_2$  (351.0832):** 351.0830 ( $\text{M}+\text{H}$ ) $^+$ .

**(3-(Furan-2-yl)-1-tosyl-4,5-dihydro-1H-pyrazol-5-yl)methanol (2h)**

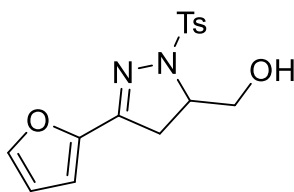

**2h**

Pyrazoline **2h** was prepared via **GP4**, using hydrazone **1h** (61 mg, 0.20 mmol) and  $\text{Mn}(\text{dpm})_3$  (12 mg, 20  $\mu\text{mol}$ ), and the reaction was stirred for 2 h. After work-up, the crude product was purified via column chromatography (hexane:ethyl acetate = 7:3,  $R_f = 0.3$ ) to give **2h** (37 mg, 0.12  $\mu\text{mol}$ , 58%) as a light yellow solid.

**$^1\text{H-NMR}$  (400 MHz,  $\text{CDCl}_3$ ):**  $\delta$  / ppm = 7.79 – 7.72 (m, 2H), 7.58 (t,  $J = 1.2$  Hz, 1H), 7.41 (t,  $J = 1.7$  Hz, 1H), 7.29 (d,  $J = 8.1$  Hz, 2H), 6.78 (dd,  $J = 1.9, 0.8$  Hz, 1H), 4.04 (dd,  $J = 11.8, 3.3$  Hz, 1H), 3.93 (ddt,  $J = 11.0, 8.9, 3.7$  Hz, 1H), 3.84 (dd,  $J = 11.8, 4.1$  Hz, 1H), 3.08 – 2.86 (m, 2H), 2.52 (s,  $J = 24.6$  Hz, 1H), 2.39 (s, 3H).

**$^{13}\text{C-NMR}$  (101 MHz,  $\text{CDCl}_3$ ):**  $\delta$  / ppm = 152.8, 144.7, 144.3, 143.6, 131.6, 129.8, 128.8, 118.9, 108.4, 64.4, 63.1, 37.2, 21.7.

**IR (Diamond-ATR, neat):**  $\tilde{\nu}$  /  $\text{cm}^{-1}$  = 3510, 3127, 2925, 2254, 1761, 1620, 1597, 1516, 1351, 1162, 1089, 1001, 909, 872, 813, 728, 665, 588, 549.

**MS (ESI):**  $m/z$  (%) = 343 (100), 321 (74), 166 (67), 159 (22), 135 (17).

**HRMS (ESI) for  $\text{C}_{15}\text{H}_{16}\text{N}_2\text{NaO}_4\text{S}$  (343.0723):** 343.0722 ( $\text{M}+\text{Na}$ ) $^+$ .

**M.p. ( $^\circ\text{C}$ ):** 153–155.

**(3-(Furan-2-yl)-1-((4-nitrophenyl)sulfonyl)-4,5-dihydro-1H-pyrazol-5-yl)methanol (2i)**

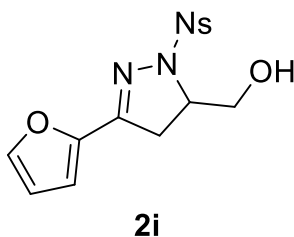

Pyrazoline **2i** was prepared via **GP4**, using hydrazone **1i** (67 mg, 0.20 mmol) and  $\text{Mn}(\text{dpm})_3$  (6.0 mg, 10  $\mu\text{mol}$ ), and the reaction was stirred for 2 h. After work-up, the crude product was purified via column chromatography (hexane:ethyl acetate = 3:2–1:1,  $R_f$  = 0.3) to give **2i** (50 mg, 0.14 mmol, 70%) as a light yellow oil.

**$^1\text{H-NMR}$  (400 MHz,  $\text{DMSO-d}_6$ ):**  $\delta$  / ppm = 8.42 – 8.37 (m, 2H), 8.12 (dd,  $J$  = 1.5, 0.8 Hz, 1H), 8.09 – 8.05 (m, 2H), 7.77 (t,  $J$  = 1.7 Hz, 1H), 6.77 (dd,  $J$  = 1.9, 0.8 Hz, 1H), 5.14 (t,  $J$  = 5.4 Hz, 1H), 4.05 – 3.94 (m, 1H), 3.77 – 3.64 (m, 2H), 3.14 – 2.99 (m, 2H).

**$^{13}\text{C-NMR}$  (101 MHz,  $\text{DMSO-d}_6$ ):**  $\delta$  / ppm = 154.4, 150.3, 145.3, 145.0, 140.2, 129.7, 124.4, 118.2, 107.8, 62.6, 62.3, 37.0.

**IR (Diamond-ATR, neat):**  $\tilde{\nu}$  /  $\text{cm}^{-1}$  = 3369, 3107, 2970, 1738, 1619, 1529, 1351, 1310, 1175, 1089, 1025, 1003, 834, 873, 856, 805, 738, 686, 647, 618, 593, 578, 464.

**MS (ESI):**  $m/z$  (%) = 374 (100), 352 (16), 173 (13), 166 (63), 142 (43), 135 (15).

**HRMS (ESI) for  $\text{C}_{14}\text{H}_{13}\text{N}_3\text{NaO}_6\text{S}$  (374.0417):** 374.0417 ( $\text{M}+\text{Na}$ ) $^+$ .

**(3-(*tert*-Butyl)-1-tosyl-4,5-dihydro-1*H*-pyrazol-5-yl)methanol (2j)**

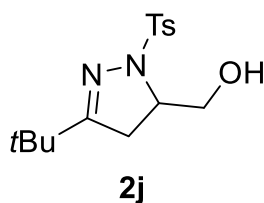

Pyrazoline **2j** was prepared via **GP4**, using hydrazone **1j** (31.0 mg, 105  $\mu$ mol) and  $\text{Mn}(\text{dpm})_3$  (6.0 mg, 10  $\mu$ mol), and the reaction was stirred for 2 h. After work-up, the crude product was purified via column chromatography (hexane:ethyl acetate = 6:4,  $R_f$  = 0.3) to give **2j** (21 mg, 68  $\mu$ mol, 64%) as a colorless solid.

**$^1\text{H-NMR}$  (400 MHz,  $\text{CDCl}_3$ ):**  $\delta$  / ppm = 7.76 – 7.69 (m, 2H), 7.34 – 7.27 (m, 2H), 3.99 – 3.89 (m, 1H), 3.82 – 3.69 (m, 2H), 2.76 – 2.55 (m, 2H), 2.42 (s, 3H), 2.5 – 2.3 (s, 1H), 1.06 (s, 9H).

**$^{13}\text{C-NMR}$  (101 MHz,  $\text{CDCl}_3$ ):**  $\delta$  / ppm = 171.3, 144.5, 131.3, 129.4, 129.0, 64.6, 63.4, 35.7, 34.4, 28.0, 21.7.

The spectra are in agreement with the literature.<sup>11</sup>



**(3-Cyclopropyl-1-tosyl-4,5-dihydro-1H-pyrazol-5-yl)methanol (2k)**

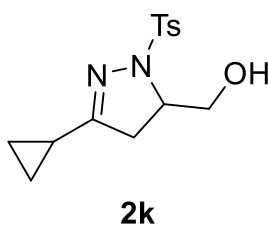

Pyrazoline **2k** was prepared via **GP4**, using hydrazone **1k** (28 mg, 0.10 mmol) and  $\text{Mn}(\text{dpm})_3$  (6.0 mg, 10  $\mu\text{mol}$ ), and the reaction was stirred for 2 h. After work-up, the crude product was purified via column chromatography (hexane:ethyl acetate = 6:4,  $R_f = 0.25$ ) to give **2k** (14 mg, 48  $\mu\text{mol}$ , 48%) as a colorless oil.

**$^1\text{H-NMR}$  (400 MHz,  $\text{CDCl}_3$ ):**  $\delta$  / ppm = 7.77 – 7.69 (m, 2H), 7.36 – 7.29 (m, 2H), 3.95 (dd,  $J = 11.6, 3.0$  Hz, 1H), 3.84 – 3.68 (m, 2H), 2.64 – 2.46 (m, 2H), 2.44 (s, 3H), 1.65 (tt,  $J = 8.3, 5.0$  Hz, 1H), 0.92 – 0.75 (m, 3H), 0.73 – 0.62 (m, 1H).

**$^{13}\text{C-NMR}$  (101 MHz,  $\text{CDCl}_3$ ):**  $\delta$  / ppm = 165.7, 144.5, 131.7, 129.6, 128.9, 64.5, 62.8, 37.2, 21.8, 11.2, 7.7, 7.3.

**IR (Diamond-ATR, neat):**  $\tilde{\nu}$  /  $\text{cm}^{-1}$  = 3412, 2924, 1617, 1497, 1351, 1165, 1092, 815, 667, 594.

**MS (ESI):**  $m/z$  (%) = 295 (100), 177 (32), 150 (15), 140 (60).

**HRMS (ESI) for  $\text{C}_{14}\text{H}_{19}\text{N}_2\text{O}_3\text{S}$  (295.1111):** 295.1110 ( $\text{M}+\text{H}$ ) $^+$ .

**(3-(Cyclohex-3-en-1-yl)-1-tosyl-4,5-dihydro-1H-pyrazol-5-yl)methanol (2I)**

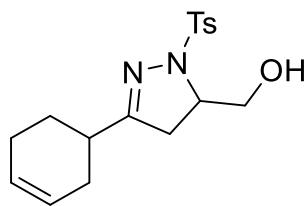

**2I**

Pyrazoline **2I** was prepared via **GP4**, using hydrazone **1I** (62 mg, 0.20 mmol) and  $\text{Mn}(\text{dpm})_3$  (12 mg, 20  $\mu\text{mol}$ ), and the reaction was stirred for 2 h. After work-up, the crude product was purified via column chromatography (hexane:ethyl acetate = 6:4,  $R_f$  = 0.3) to give **2I** (28 mg, 84  $\mu\text{mol}$ , 42%) as a colorless oil.

**$^1\text{H-NMR}$  (400 MHz,  $\text{CDCl}_3$ ):**  $\delta$  / ppm = 7.73 (dq,  $J$  = 8.5, 2.1 Hz, 2H), 7.35 – 7.28 (m, 2H), 5.65 (q,  $J$  = 2.3 Hz, 2H), 3.97 (dd,  $J$  = 11.6, 2.9 Hz, 1H), 3.84 – 3.70 (m, 2H), 2.79 – 2.46 (m, 4H), 2.43 (s, 3H), 2.16 – 1.95 (m, 4H), 1.86 – 1.76 (m, 1H), 1.57 – 1.42 (m, 1H).

**$^{13}\text{C-NMR}$  (101 MHz,  $\text{CDCl}_3$ ):**  $\delta$  / ppm = 167.4, 167.2, 144.6, 144.5, 131.52, 131.48, 129.6, 129.0, 128.9, 127.0, 126.9, 125.3, 125.2, 64.5, 62.9, 62.8, 37.3, 37.2, 35.43, 35.35, 28.6, 28.5, 26.4, 26.0, 24.8, 24.5, 21.8.

**IR (Diamond-ATR, neat):**  $\tilde{\nu}$  /  $\text{cm}^{-1}$  = 3500, 2923, 2854, 1597, 1400, 1352, 1165, 1091, 707, 665, 923, 550.

**MS (ESI):**  $m/z$  (%) = 357 (100), 335 (80), 257 (40), 255 (40), 214 (30), 212 (33), 177 (25).

**HRMS (ESI) for  $\text{C}_{17}\text{H}_{22}\text{N}_2\text{NaO}_3\text{S}$  (357.1243):** 357.1244 ( $\text{M}+\text{Na}$ ) $^+$ .

**(E)-3-(But-2-en-2-yl)-1-tosyl-4,5-dihydro-1H-pyrazol-5-yl)methanol (2m)**

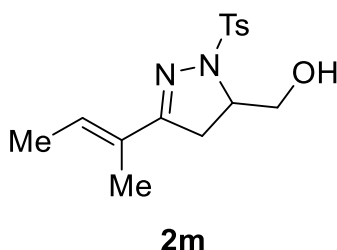

Pyrazoline **2m** was prepared via **GP4**, using hydrazone **1m** (27 mg, 92  $\mu$ mol) and  $\text{Mn}(\text{dpm})_3$  (6.0 mg, 10  $\mu$ mol), and the reaction was stirred for 2 h. After work-up, the crude product was purified via column chromatography (hexane:ethyl acetate = 7:3,  $R_f$  = 0.3) to give **2m** (16 mg, 52  $\mu$ mol, 57%) as a colorless oil.

**$^1\text{H-NMR}$  (400 MHz,  $\text{CDCl}_3$ ):**  $\delta$  / ppm = 7.83 – 7.74 (m, 2H), 7.35 – 7.29 (m, 2H), 5.81 (dddd,  $J$  = 8.3, 6.9, 5.6, 1.4 Hz, 1H), 4.02 (dd,  $J$  = 11.4, 2.7 Hz, 1H), 3.90 – 3.78 (m, 2H), 2.90 – 2.80 (m, 2H), 2.61 (s, 1H), 2.44 (s, 3H), 1.92 (q,  $J$  = 1.1 Hz, 3H), 1.78 (dq,  $J$  = 7.0, 1.1 Hz, 3H).

**$^{13}\text{C-NMR}$  (101 MHz,  $\text{CDCl}_3$ ):**  $\delta$  / ppm = 161.4, 144.5, 132.4, 131.6, 130.3, 129.6, 128.8, 64.5, 63.8, 36.0, 21.8, 14.4, 12.5.

**IR (Diamond-ATR, neat):**  $\tilde{\nu}$  /  $\text{cm}^{-1}$  = 3520, 2924, 2856, 1573, 1641, 1352, 1256, 1166, 949, 815, 670, 589, 547.

**MS (ESI):**  $m/z$  (%) = 331 (100), 309 (44), 295 (83), 227 (20), 177 (50), 154 (64).

**HRMS (ESI) for  $\text{C}_{15}\text{H}_{20}\text{N}_2\text{NaO}_3\text{S}$  (331.1087):** 331.1083 ( $\text{M}+\text{Na}$ ) $^+$ .

## Phenyl(3-phenyl-1-tosyl-4,5-dihydro-1H-pyrazol-5-yl)methanol (**2n**)

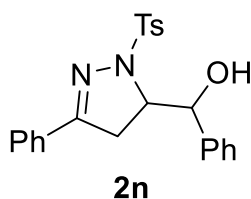

Pyrazoline **2n** was prepared via **GP4**, using hydrazone **1n** (77.0 mg, 197  $\mu\text{mol}$ ) and  $\text{Mn}(\text{dpm})_3$  (12 mg, 20  $\mu\text{mol}$ ), and the reaction was stirred for 2 h. After work-up, the crude product was purified via column chromatography (hexane:ethyl acetate = 8.5:1.5) to give **2n** as a mix of diastereomers. Major ( $R_f = 0.35$ ): 42.0 mg, 103  $\mu\text{mol}$ , 52%, colorless solid. Minor ( $R_f = 0.2$ ): 21 mg, 52  $\mu\text{mol}$ , 26%, colorless oil. Combined: 63.0 mg, 155  $\mu\text{mol}$ , 79%.

**$^1\text{H-NMR}$  (400 MHz,  $\text{CDCl}_3$ , minor diastereomer):**  $\delta$  / ppm = 7.86 – 7.81 (m, 2H), 7.58 – 7.53 (m, 2H), 7.47 – 7.42 (m, 2H), 7.41 – 7.27 (m, 8H), 4.96 (d,  $J = 7.4$  Hz, 1H), 4.25 (dt,  $J = 10.9, 7.7$  Hz, 1H), 2.85 – 2.66 (m, 2H), 2.39 (s, 3H).

**$^{13}\text{C-NMR}$  (101 MHz,  $\text{CDCl}_3$ , minor diastereomer):**  $\delta$  / ppm = 159.4, 144.9, 139.7, 132.0, 131.0, 130.4, 129.9, 128.82, 128.81, 128.7, 128.6, 127.7, 127.2, 76.4, 67.1, 37.2, 21.8.

**$^1\text{H-NMR}$  (400 MHz,  $\text{CD}_2\text{Cl}_2$ , major diastereomer):**  $\delta$  / ppm = 7.83 (m, 2H), 7.60 (m, 2H), 7.37 (m, 10H), 5.55 (d,  $J = 2.2$  Hz, 1H), 4.13 (ddd,  $J = 11.3, 9.0, 2.3$  Hz, 1H), 3.29 (dd,  $J = 17.4, 9.1$  Hz, 1H), 2.70 (s, 1H), 2.64 – 2.52 (m, 1H), 2.37 (s, 3H).

**$^{13}\text{C-NMR}$  (101 MHz,  $\text{CD}_2\text{Cl}_2$ , major diastereomer):**  $\delta$  / ppm = 159.5, 145.2, 140.1, 132.0, 131.1, 130.1, 129.0, 128.94, 128.92, 128.0, 127.3, 126.0, 72.9, 68.6, 33.2, 21.7.

**IR (Diamond-ATR, neat):**  $\tilde{\nu}$  /  $\text{cm}^{-1}$  = 3501, 3063, 2923, 2853, 1597, 1449, 1360, 1168, 1092, 1012, 814, 766, 747, 706, 693, 659, 592, 555

**MS (ESI):**  $m/z$  (%) = 429 (100), 371 (27), 322 (17), 194 (29), 159 (58).

**HRMS (ESI) for  $\text{C}_{23}\text{H}_{22}\text{N}_2\text{NaO}_3\text{S}$  (429.1243):** 429.1244 ( $\text{M}+\text{Na}$ ) $^+$ .

**M.p. (major diastereomer,  $^\circ\text{C}$ ):** 220  $^\circ\text{C}$  (decomposition).

**(3-(3,5-Dimethylphenyl)-4,4-dimethyl-1-tosyl-4,5-dihydro-1H-pyrazol-5-yl)methanol (2o)**

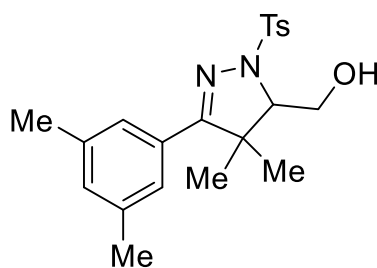

**2o**

Pyrazoline **2o** was prepared via **GP4**, using hydrazone **1o** (37 mg, 0.10 mmol) and Mn(dpm)<sub>3</sub> (6.0 mg, 10 μmol), and the reaction was stirred for 2 h. After work-up, the crude product was purified via column chromatography (hexane:ethyl acetate = 7:3, R<sub>f</sub> = 0.35) to give **2o** (25 mg, 65 μmol, 65%) as a colorless oil.

**<sup>1</sup>H-NMR (400 MHz, CDCl<sub>3</sub>):** δ / ppm = 7.86 – 7.78 (m, 2H), 7.37 – 7.29 (m, 2H), 7.18 (dt, *J* = 1.6, 0.7 Hz, 2H), 7.03 (tq, *J* = 1.3, 0.7 Hz, 1H), 4.12 (dd, *J* = 12.7, 6.3 Hz, 1H), 3.89 (dd, *J* = 12.7, 2.5 Hz, 1H), 3.16 (dd, *J* = 6.3, 2.5 Hz, 1H), 2.43 (s, 3H), 2.31 (q, *J* = 0.7 Hz, 6H), 1.24 (s, 3H), 1.13 (s, 3H).

**<sup>13</sup>C-NMR (101 MHz, CDCl<sub>3</sub>):** δ / ppm = 165.3, 144.8, 138.1, 131.9, 130.9, 130.3, 129.7, 129.1, 125.5, 74.7, 61.0, 51.4, 25.4, 21.8, 21.5, 19.4.

**IR (Diamond-ATR, neat):**  $\tilde{\nu}$  / cm<sup>-1</sup> = 3531, 2969, 2923, 1598, 1465, 1356, 1168, 983, 882, 687, 586.

**MS (ESI):** *m/z* (%) = 387 (100), 295 (49), 232 (41), 177 (29).

**HRMS (ESI) for C<sub>21</sub>H<sub>27</sub>N<sub>2</sub>O<sub>3</sub>S (387.1737):** 387.1737 (M+H)<sup>+</sup>.

**(1-((4-Nitrophenyl)sulfonyl)-3-phenyl-4,5-dihydro-1H-pyrazol-5-yl)methanol (2p)**

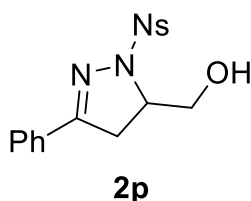

Pyrazoline **2p** was prepared via **GP4**, using hydrazone **1p** (35 mg, 0.10 mmol) and  $\text{Mn}(\text{dpm})_3$  (6.0 mg, 10  $\mu\text{mol}$ ), and the reaction was stirred for 2 h. After work-up, the crude product was purified via column chromatography (hexane:ethyl acetate = 7:3,  $R_f = 0.35$ ) to give **2p** (29 mg, 80  $\mu\text{mol}$ , 80%) as a light yellow solid.

**$^1\text{H-NMR}$  (400 MHz,  $\text{CDCl}_3$ ):**  $\delta$  / ppm = 8.41 – 8.28 (m, 2H), 8.19 – 8.06 (m, 2H), 7.69 – 7.62 (m, 2H), 7.48 – 7.34 (m, 3H), 4.12 (dd,  $J = 11.8, 3.5$  Hz, 1H), 4.05 (ddt,  $J = 11.0, 8.9, 3.6$  Hz, 1H), 3.91 (dd,  $J = 11.8, 3.7$  Hz, 1H), 3.32 – 3.09 (m, 2H), 2.13 (s, 1H).

**$^{13}\text{C-NMR}$  (101 MHz,  $\text{CDCl}_3$ ):**  $\delta$  / ppm = 159.5, 150.6, 140.7, 131.2, 130.0, 129.9, 128.8, 127.0, 124.2, 64.1, 63.6, 36.6.

**IR (Diamond-ATR, neat):**  $\tilde{\nu}$  /  $\text{cm}^{-1}$  = 3531, 3105, 3065, 2925, 1605, 1528, 1349, 1172, 1092, 1011, 907, 854, 734, 612.

**MS (ESI):**  $m/z$  (%) = 384 (73), 362 (19), 269 (31), 252 (40), 176 (64).

**HRMS (ESI) for  $\text{C}_{16}\text{H}_{15}\text{N}_3\text{O}_5\text{SNa}$  (384.0625):** 384.0626 ( $\text{M}+\text{Na}$ ) $^+$ .

**M.p. ( $^\circ\text{C}$ ):** 140–141.

**Methyl 4-(5-(hydroxymethyl)-1-((4-nitrophenyl)sulfonyl)-4,5-dihydro-1H-pyrazol-3-yl)benzoate (2q)**

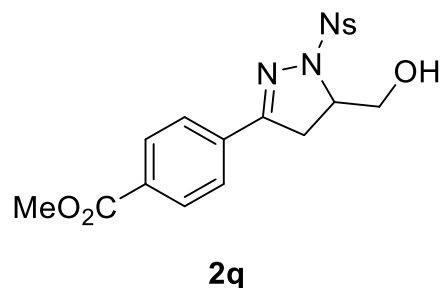

Pyrazoline **2q** was prepared via **GP4**, using hydrazone **1q** (40 mg, 0.10 mmol) and  $\text{Mn}(\text{dpm})_3$  (6.0 mg, 10  $\mu\text{mol}$ ), and the reaction was stirred for 2 h. After work-up, the crude product was purified via column chromatography (hexane:ethyl acetate = 1:1, ,  $R_f = 0.32$ ) to give **2q** (31 mg, 74  $\mu\text{mol}$ , 74%) as a light yellow solid.

**$^1\text{H-NMR}$  (400 MHz,  $\text{CDCl}_3$ ):**  $\delta$  / ppm = 8.36 – 8.30 (m, 2H), 8.14 – 8.06 (m, 2H), 8.04 – 7.97 (m, 2H), 7.72 – 7.65 (m, 2H), 4.19 – 4.04 (m, 2H), 3.92 (s, 4H), 3.39 – 3.13 (m, 2H), 2.44 (s, 1H).

**$^{13}\text{C-NMR}$  (101 MHz,  $\text{CDCl}_3$ ):**  $\delta$  / ppm = 166.3, 158.5, 150.8, 140.8, 134.1, 132.3, 130.0, 129.9, 127.0, 124.4, 64.0, 63.9, 52.5, 36.5.

**IR (Diamond-ATR, neat):**  $\tilde{\nu}$  /  $\text{cm}^{-1}$  = 3559, 3111, 2924, 1712, 1603, 1531, 1440, 1355, 1288, 1172, 1113, 1046, 1017, 860, 769, 739, 698, 683, 619, 594, 570, 553, 464.

**MS (ESI):**  $m/z$  (%) = 442 (5), 371 (25), 322 (15), 223 (11), 194 (15), 160 (10), 159 (100), 145 (12).

**HRMS (ESI) for  $\text{C}_{18}\text{H}_{17}\text{N}_3\text{NaO}_7\text{S}$  (442.0679):** 442.0672 ( $\text{M}+\text{Na}$ ) $^+$ .

**M.p. ( $^\circ\text{C}$ ):** 176–179 (decomposition).

**(1-(Methylsulfonyl)-3-phenyl-4,5-dihydro-1H-pyrazol-5-yl)methanol (2r)**

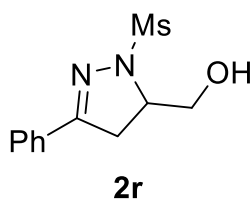

Pyrazoline **2r** was prepared via **GP4**, using hydrazone **1r** (24 mg, 0.10 mmol) and  $\text{Mn}(\text{dpm})_3$  (6.0 mg, 10  $\mu\text{mol}$ ), and the reaction was stirred for 2 h. After work-up, the crude product was purified via column chromatography (hexane:ethyl acetate = 6:4,  $R_f = 0.3$ ) to give **2r** (19 mg, 75  $\mu\text{mol}$ , 75%) as a colorless solid.

**$^1\text{H-NMR}$  (500 MHz,  $\text{CDCl}_3$ ):**  $\delta$  / ppm = 7.78 – 7.71 (m, 2H), 7.48 – 7.39 (m, 3H), 4.40 (dddd,  $J = 11.2, 9.0, 4.0, 3.4$  Hz, 1H), 4.04 (dd,  $J = 11.9, 3.4$  Hz, 1H), 3.84 (dd,  $J = 12.0, 4.0$  Hz, 1H), 3.49 (dd,  $J = 17.2, 11.2$  Hz, 1H), 3.29 (dd,  $J = 17.3, 8.9$  Hz, 1H), 3.13 (s, 3H), 2.35 (s, 1H).

**$^{13}\text{C-NMR}$  (101 MHz,  $\text{CDCl}_3$ ):**  $\delta$  / ppm = 158.9, 131.1, 130.5, 128.9, 127.2, 64.4, 62.5, 37.0, 36.8.

**IR (Diamond-ATR, neat):**  $\tilde{\nu}$  /  $\text{cm}^{-1}$  = 3521, 2929, 1448, 1343, 1162, 1010, 961, 692, 569, 531, 508.

**MS (ESI):**  $m/z$  (%) = 277 (65), 269 (23), 177 (29), 173 (45), 167 (16).

**HRMS (ESI) for  $\text{C}_{11}\text{H}_{14}\text{N}_2\text{O}_3\text{S}$  (277.0614):** 277.0617 ( $\text{M}+\text{Na}$ ) $^+$ .

**M.p. ( $^\circ\text{C}$ ):** 160–162.



**(6-Phenyl-2-tosyl-2,3,4,5-tetrahydropyridazin-3-yl)methanol (2s)**

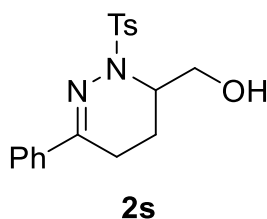

Tetrahydropyridazine **2s** was prepared via **GP4**, using hydrazone **1s** (41.0 mg, 125  $\mu$ mol) and  $\text{Mn}(\text{dpm})_3$  (8.0 mg, 13  $\mu$ mol), and the reaction was stirred for 2 h. After work-up, the crude product was purified via column chromatography (hexane:ethyl acetate = 1:1 + 1% trimethylamine,  $R_f$  = 0.3) to give **2s** (23 mg, 67  $\mu$ mol, 53%) as a light yellow oil.

**$^1\text{H-NMR}$  (400 MHz,  $\text{CDCl}_3$ ):**  $\delta$  / ppm = 7.91 – 7.83 (m, 2H), 7.73 – 7.63 (m, 2H), 7.39 – 7.32 (m, 3H), 7.32 – 7.27 (m, 2H), 4.45 – 4.36 (m, 1H), 3.84 (dd,  $J$  = 11.6, 5.7 Hz, 1H), 3.69 (t,  $J$  = 8.4 Hz, 1H), 2.61 (dddd,  $J$  = 18.0, 5.7, 2.1, 1.1 Hz, 1H), 2.50 – 2.42 (m, 1H), 2.40 (s, 3H), 2.23 (ddt,  $J$  = 13.7, 6.6, 2.1 Hz, 1H), 2.10 – 2.01 (m, 1H), 1.63 – 1.50 (m, 1H).

**$^{13}\text{C-NMR}$  (101 MHz,  $\text{CDCl}_3$ ):**  $\delta$  / ppm =  $\delta$  148.2, 144.1, 137.0, 135.6, 129.7, 129.4, 128.5, 128.1, 125.4, 63.5, 53.3, 21.7, 19.1, 18.8.

**IR (Diamond-ATR, neat):**  $\tilde{\nu}$  /  $\text{cm}^{-1}$  = 3523, 3064, 2931, 1597, 1495, 1447, 1339, 1168, 990, 972.

**MS (ESI):**  $m/z$  (%) = 345 (84), 310 (43), 237 (87), 181 (57), 159 (35), 116 (24), 111 (100), 102 (24).

**HRMS (ESI) for  $\text{C}_{18}\text{H}_{21}\text{N}_2\text{O}_3\text{S}$  (345.1267):** 345.1266 ( $\text{M}+\text{H}$ ) $^+$ .

**(2-Tosyl-6-(2-(trifluoromethoxy)phenyl)-2,3,4,5-tetrahydropyridazin-3-yl)methanol (2t)**

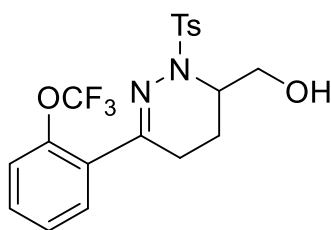

**2t**

Tetrahydropyridazine **2t** was prepared via **GP4**, using hydrazone **1t** (82 mg, 0.20 mmol) and  $\text{Mn}(\text{dpm})_3$  (12 mg, 20  $\mu\text{mol}$ ), and the reaction was stirred for 2 h. After work-up, the crude product was purified via column chromatography (hexane:ethyl acetate = 7:3,  $R_f$  = 0.25) to give **2t** (48.0 mg, 112  $\mu\text{mol}$ , 56%) as a colorless oil.

**$^1\text{H-NMR}$  (400 MHz,  $\text{CDCl}_3$ ):**  $\delta$  / ppm = 7.94 (dd,  $J$  = 8.3, 1.9 Hz, 2H), 7.51 – 7.44 (m, 1H), 6.97 – 6.73 (m, 5H), 4.40 (q,  $J$  = 7.0, 6.6 Hz, 1H), 3.88 – 3.71 (m, 1H), 3.52 (dq,  $J$  = 17.1, 10.4, 9.6 Hz, 1H), 2.40 – 2.24 (m, 1H), 2.19 – 1.72 (m, 6H), 1.07 (ddt,  $J$  = 16.9, 13.8, 5.6 Hz, 1H).

**$^{13}\text{C-NMR}$  (101 MHz,  $\text{CDCl}_3$ ):**  $\delta$  / ppm = 147.6, 147.0, 143.6, 136.6, 132.7, 130.7, 130.1, 129.6, 127.3, 122.3, 121.2, 119.8, 63.3, 53.9, 22.3, 21.1, 18.3.

**IR (Diamond-ATR, neat):**  $\tilde{\nu}$  /  $\text{cm}^{-1}$  = 3524, 2930, 2878, 1598, 1493, 1248, 1217, 1166, 1091, 830, 670.

**MS (ESI):**  $m/z$  (%) = 429 (100), 223 (6), 194 (8).

**HRMS (ESI) for  $\text{C}_{19}\text{H}_{20}\text{F}_3\text{N}_2\text{O}_4\text{S}$  (429.1090):** 429.1085 ( $\text{M}+\text{H}$ ) $^+$ .

***tert*-Butyl 3-(6-(hydroxymethyl)-1-tosyl-1,4,5,6-tetrahydropyridazin-3-yl)-1*H*-indole-1-carboxylate (**2u**)**

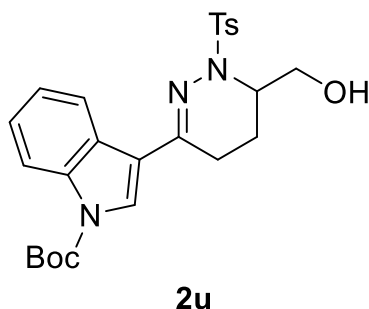

Tetrahydropyridazine **2u** was prepared via **GP4**, using hydrazone **1u** (63.0 mg, 135  $\mu$ mol) and  $\text{Mn(dpm)}_3$  (8.0 mg, 13  $\mu$ mol), and the reaction was stirred for 2 h. After work-up, the crude product was purified via column chromatography (hexane:ethyl acetate = 1:1,  $R_f$  = 0.3) to give **2u** (25 mg, 52  $\mu$ mol, 39%) as a colorless oil.

**$^1\text{H-NMR}$  (400 MHz,  $\text{CDCl}_3$ ):**  $\delta$  / ppm = 8.41 – 8.37 (m, 1H), 8.09 (d,  $J$  = 8.2 Hz, 1H), 7.92 – 7.85 (m, 2H), 7.72 (s, 1H), 7.39 – 7.23 (m, 5H), 4.44 – 4.35 (m, 1H), 3.90 (dd,  $J$  = 11.4, 5.8 Hz, 1H), 3.77 (d,  $J$  = 8.3 Hz, 1H), 2.62 – 2.41 (m, 2H), 2.38 (s, 3H), 2.20 (ddt,  $J$  = 13.7, 6.1, 2.3 Hz, 1H), 2.06 (s, 1H), 1.67 (s, 9H), 1.59 (dtd,  $J$  = 13.8, 11.8, 6.1 Hz, 2H).

**$^{13}\text{C-NMR}$  (101 MHz,  $\text{CDCl}_3$ ):**  $\delta$  / ppm = 149.6, 145.9, 144.1, 136.2, 135.5, 129.8, 128.1, 127.4, 125.4, 125.3, 123.9, 123.8, 119.2, 114.9, 84.6, 63.8, 53.6, 28.3, 21.7, 19.3, 18.9.

**IR (Diamond-ATR, neat):**  $\tilde{\nu}$  /  $\text{cm}^{-1}$  = 3532, 1733, 1598, 1451, 1361, 1185, 728, 627.

**MS (ESI):**  $m/z$  (%) = 484 (100), 340 (59), 329 (30), 251 (47), 228 (67), 223 (52), 194 (51).

**HRMS (ESI) for  $\text{C}_{25}\text{H}_{30}\text{N}_3\text{O}_5\text{S}$  (484.1901):** 484.1901 ( $\text{M}+\text{H}$ ) $^+$ .

**(2-((4-Nitrophenyl)sulfonyl)-6-phenyl-2,3,4,5-tetrahydropyridazin-3-yl)methanol (2v)**

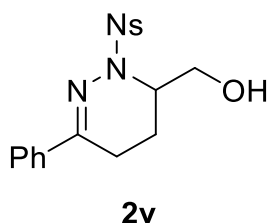

Tetrahydropyridazine **2v** was prepared via **GP4**, using hydrazone **1v** (180 mg, 500  $\mu\text{mol}$ ) and  $\text{Mn}(\text{dpm})_3$  (30 mg, 50  $\mu\text{mol}$ ), and the reaction was stirred for 2 h. After work-up, the crude product was purified via column chromatography (hexane:ethyl acetate = 2:8,  $R_f$  = 0.17) to give **2v** (120 mg, 320  $\mu\text{mol}$ , 64%) as a yellow solid.

**$^1\text{H-NMR}$  (400 MHz,  $\text{CDCl}_3$ ):**  $\delta$  / ppm = 7.43 – 7.36 (m, 2H), 7.28 – 7.21 (m, 2H), 6.74 – 6.67 (m, 2H), 6.46 – 6.39 (m, 3H), 3.59 – 3.51 (m, 1H), 2.88 (dd,  $J$  = 11.3, 6.2 Hz, 1H), 2.75 (dd,  $J$  = 11.3, 6.8 Hz, 1H), 1.72 (dddd,  $J$  = 18.2, 5.8, 1.8, 1.0 Hz, 1H), 1.53 (ddd,  $J$  = 18.2, 12.7, 6.8 Hz, 1H), 1.34 (ddt,  $J$  = 13.8, 6.8, 2.0 Hz, 1H), 1.07 (s, 1H), 0.80 – 0.68 (m, 1H).

**$^{13}\text{C-NMR}$  (101 MHz,  $\text{CDCl}_3$ ):**  $\delta$  / ppm = 150.3, 149.7, 144.4, 136.4, 129.9, 129.5, 128.7, 125.4, 124.2, 63.0, 53.2, 19.1, 18.9.

**IR (Diamond-ATR, neat):**  $\tilde{\nu}$  /  $\text{cm}^{-1}$  = 3535, 3105, 2940, 1529, 1349, 1173, 1093, 854, 736, 605, 568.

**MS (ESI):**  $m/z$  (%) = 398 (77), 376 (100), 329 (40), 309 (29), 251 (29), 223 (33), 190 (100), 159 (43).

**HRMS (ESI) for  $\text{C}_{17}\text{H}_{18}\text{N}_3\text{O}_5\text{S}$  (376.0962):** 376.0968 ( $\text{M}+\text{H}$ ) $^+$ .

**M.p. ( $^\circ\text{C}$ ):** 140–143.

**3-(3-Chlorophenyl)-1-tosyl-3a,4,5,6,7,7a-hexahydro-1H-indazol-7-ol (6a)**

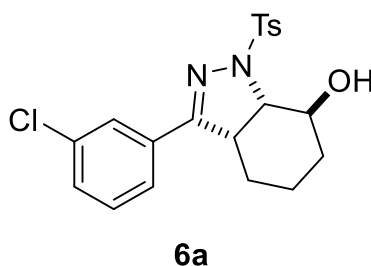

Pyrazoline **6a** was prepared via **GP4**, using hydrazone **5a** (39 mg, 0.10 mmol) and  $\text{Mn}(\text{dpm})_3$  (6.0 mg, 10  $\mu\text{mol}$ ), and the reaction was stirred for 2 h. After work-up, the crude product was purified via column chromatography (hexane:ethyl acetate = 6:4,  $R_f$  = 0.35) to give **6a** (27 mg, 67  $\mu\text{mol}$ , 67%, d.r. = 10:1) as a light yellow oil.

**$^1\text{H-NMR}$  (400 MHz,  $\text{CDCl}_3$ ):**  $\delta$  / ppm = 7.83 – 7.76 (m, 2H), 7.66 (t,  $J$  = 2.0 Hz, 1H), 7.54 (dt,  $J$  = 7.6, 1.4 Hz, 1H), 7.37 (ddd,  $J$  = 8.0, 2.1, 1.2 Hz, 1H), 7.34 – 7.28 (m, 3H), 4.57 (dt,  $J$  = 7.6, 3.8 Hz, 1H), 3.44 – 3.30 (m, 2H), 2.39 (s, 3H), 1.97 (ddd,  $J$  = 13.0, 6.6, 3.5 Hz, 1H), 1.82 (ddd,  $J$  = 12.4, 6.4, 3.2 Hz, 1H), 1.77 – 1.58 (m, 3H), 1.42 – 1.29 (m, 1H), 1.25 (dd,  $J$  = 5.2, 1.9 Hz, 1H).

**$^{13}\text{C-NMR}$  (101 MHz,  $\text{CDCl}_3$ ):**  $\delta$  / ppm = 160.7, 144.9, 135.0, 131.9, 130.8, 130.7, 130.2, 129.8, 129.2, 127.2, 125.3, 69.4, 67.4, 44.2, 27.2, 23.5, 21.8, 17.1.

**IR (Diamond-ATR, neat):**  $\tilde{\nu}$  /  $\text{cm}^{-1}$  = 3526, 2939, 2867, 1596, 1560, 1433, 1356, 1168, 1091, 1029, 979, 966, 814, 735, 688, 667, 598, 552, 535.

**MS (ESI):**  $m/z$  (%) = 427 (100), 405 (52), 295 (51), 250 (53), 177 (32).

**HRMS (ESI) for  $\text{C}_{20}\text{H}_{21}\text{ClN}_2\text{NaO}_3\text{S}$  (427.0854):** 427.0853 ( $\text{M}+\text{Na}$ ) $^+$ .

**1-Tosyl-3-(2-(trifluoromethoxy)phenyl)-3a,4,5,6,7,7a-hexahydro-1H-indazol-7-ol (6b)**

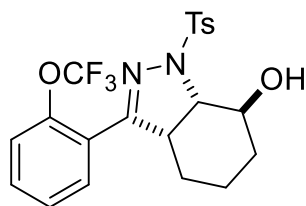

**6b**

Pyrazoline **6b** was prepared via **GP4**, using hydrazone **5b** (20 mg, 45  $\mu$ mol),  $\text{Mn}(\text{dpm})_3$  (3 mg, 5  $\mu$ mol) and *i*PrOH (0.5 mL), and the reaction was stirred for 2 h. After work-up, the crude product was purified via column chromatography (hexane:ethyl acetate = 7:3  $R_f$  = 0.3) to give **6b** (13 mg, 29  $\mu$ mol, 64%) as a colorless solid.

**$^1\text{H-NMR}$  (400 MHz,  $\text{CDCl}_3$ ):**  $\delta$  / ppm = 7.83 – 7.71 (m, 3H), 7.50 – 7.41 (m, 1H), 7.33 (td,  $J$  = 7.6, 1.2 Hz, 1H), 7.29 (d,  $J$  = 8.1 Hz, 2H), 7.26 – 7.22 (m, 1H), 4.36 – 4.26 (m, 1H), 3.57 (dd,  $J$  = 9.8, 5.6 Hz, 1H), 3.43 (td,  $J$  = 10.2, 5.2 Hz, 1H), 3.27 (s, 1H), 2.40 (s, 3H), 2.00 – 1.91 (m, 1H), 1.68 – 1.44 (m, 4H), 1.40 – 1.27 (m, 1H).

**$^{13}\text{C-NMR}$  (101 MHz,  $\text{CDCl}_3$ ):**  $\delta$  / ppm = 161.3, 147.0, 144.8, 131.8, 131.4, 131.2, 129.7, 128.8, 127.3, 124.1, 120.92, 120.90, 68.7, 68.5, 46.8, 27.4, 22.6, 21.7, 17.7.

**IR (Diamond-ATR, neat):**  $\tilde{\nu}$  /  $\text{cm}^{-1}$  = 3531, 2941, 2868, 1598, 1494, 1449, 1351, 1251, 1217, 1168, 1091, 1026, 993, 814, 767, 668, 598, 553.

**MS (ESI):**  $m/z$  (%) = 477 (77), 456 (63), 455 (100), 437 (29), 300 (24).

**HRMS (ESI) for  $\text{C}_{21}\text{H}_{21}\text{F}_3\text{N}_2\text{NaO}_4\text{S}$  (477.1066):** 477.1062 ( $\text{M}+\text{Na}$ ) $^+$ .

**M.p. ( $^\circ\text{C}$ ):** 109–111.

### 3-Phenyl-1-tosyl-3a,4,5,6,7,7a-hexahydro-1H-indazol-7-ol (**6c**)

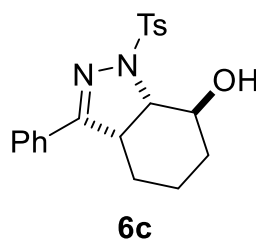

Pyrazoline **6c** was prepared via **GP4**, using hydrazone **5c** (71.0 mg, 200  $\mu\text{mol}$ ) and  $\text{Mn}(\text{dpm})_3$  (12 mg, 20  $\mu\text{mol}$ ), and the reaction was stirred for 2 h. After work-up, the crude product was purified via column chromatography (hexane:ethyl acetate = 7:3,  $R_f$  = 0.28) to give **6c** (57.0 mg, 154  $\mu\text{mol}$ , 77%) as a colorless solid.

**$^1\text{H-NMR}$  (400 MHz,  $\text{CDCl}_3$ ):**  $\delta$  / ppm = 7.81 – 7.77 (m, 2H), 7.71 – 7.65 (m, 2H), 7.44 – 7.34 (m, 3H), 7.32 – 7.26 (m, 2H), 4.56 (dt,  $J$  = 7.3, 3.5 Hz, 1H), 3.45 – 3.31 (m, 2H), 3.19 (s, 1H), 2.39 (d,  $J$  = 4.2 Hz, 3H), 2.02 – 1.92 (m, 1H), 1.90 – 1.56 (m, 4H), 1.54 – 1.31 (m, 1H).

**$^{13}\text{C-NMR}$  (101 MHz,  $\text{CDCl}_3$ ):**  $\delta$  / ppm = 161.9, 144.7, 130.7, 129.7, 129.2, 128.89, 128.87, 127.29, 127.27, 69.3, 67.6, 44.4, 27.3, 23.6, 21.7, 17.3.

**IR (Diamond-ATR, neat):**  $\tilde{\nu}$  /  $\text{cm}^{-1}$  = 3554, 2958, 2941, 1349, 1167, 1091, 664, 596, 502.

**MS (ESI):**  $m/z$  (%) = 371 (20), 251 (34), 223 (35), 216 (21), 194 (19).

**HRMS (ESI) for  $\text{C}_{20}\text{H}_{23}\text{N}_2\text{O}_3\text{S}$  (371.1424):** 371.1425 ( $\text{M}+\text{H}$ ) $^+$ .

**M.p. ( $^\circ\text{C}$ ):** 112–115.

For 1D NOE experiments, a diastereomeric mixture was prepared according to literature<sup>11</sup> and separated via column chromatography (hexane:ethyl acetate = 7:3).

**<sup>1</sup>H-NMR (500 MHz, CDCl<sub>3</sub>, minor diastereomer):**  $\delta$  / ppm = 7.84 – 7.79 (m, 2H), 7.69 – 7.66 (m, 2H), 7.44 – 7.36 (m, 3H), 7.32 – 7.28 (m, 2H), 4.12 (m, 1H), 4.09 – 4.03 (m, 1H), 3.67 (ddd,  $J$  = 8.6, 3.2, 0.9 Hz, 1H), 3.40 – 3.32 (m, 1H), 2.39 (s, 3H), 1.95 (dq,  $J$  = 9.4, 6.7, 6.1 Hz, 1H), 1.88 – 1.74 (m, 3H), 1.54 – 1.47 (m, 2H).

**<sup>13</sup>C-NMR (126 MHz, CDCl<sub>3</sub>, minor diastereomer):**  $\delta$  / ppm = 162.0, 144.9, 130.83, 130.79, 130.0, 129.8, 129.2, 128.9, 127.3, 68.18, 68.17, 47.0, 27.7, 23.5, 21.8, 20.3.

**<sup>1</sup>H-NMR (400 MHz, C<sub>6</sub>D<sub>6</sub>, major diastereomer):**  $\delta$  / ppm = 8.03 – 7.96 (m, 2H), 7.53 – 7.43 (m, 2H), 7.08 – 6.99 (m, 3H), 6.74 – 6.66 (m, 2H), 4.76 (dt,  $J$  = 7.1, 3.5 Hz, 1H), 3.48 (dd,  $J$  = 8.7, 4.0 Hz, 1H), 2.86 (ddd,  $J$  = 12.3, 8.8, 5.3 Hz, 2H), 1.86 (m, 1H), 1.73 (s, 3H), 1.51 – 1.27 (m, 3H), 1.13 (tdd,  $J$  = 11.5, 7.8, 5.7 Hz, 1H), 1.05 – 0.88 (m, 1H).

**<sup>13</sup>C-NMR (126 MHz, C<sub>6</sub>D<sub>6</sub>, major diastereomer):**  $\delta$  / ppm = 161.7, 144.1, 132.3, 130.7, 130.4, 129.58, 129.55, 128.8, 127.4, 69.3, 66.9, 43.7, 27.7, 24.1, 21.1, 17.0.



### 3-Phenyl-1-tosyl-1,2-diazaspiro[4.4]non-2-en-6-ol (**8a**)

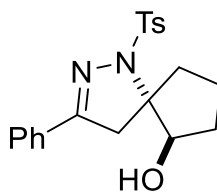

**8a**

Pyrazoline **8a** was prepared via **GP4**, using hydrazone **7a** (89 mg, 0.25 mmol) and  $\text{Mn}(\text{dpm})_3$  (30 mg, 50  $\mu\text{mol}$ ), and the reaction was stirred for 2 h. After work-up, the crude product was purified via column chromatography (hexane:ethyl acetate = 2:8,  $R_f$  = 0.35) to give **8a** (61 mg, 16  $\mu\text{mol}$ , 64%) as a colorless solid.

**$^1\text{H-NMR}$  (400 MHz,  $\text{CDCl}_3$ ):**  $\delta$  / ppm = 7.93 (d,  $J$  = 8.0 Hz, 2H), 7.72 – 7.64 (m, 2H), 7.43 – 7.33 (m, 3H), 7.30 (d,  $J$  = 8.0 Hz, 2H), 4.92 (t,  $J$  = 9.0 Hz, 1H), 3.74 (d,  $J$  = 16.9 Hz, 1H), 2.77 (d,  $J$  = 16.9 Hz, 1H), 2.59 – 2.47 (m, 1H), 2.40 (s, 3H), 2.13 – 2.00 (m, 1H), 1.92 (s, 1H), 1.85 – 1.69 (m, 1H), 1.68 – 1.51 (m, 2H), 1.51 – 1.37 (m, 1H).

**$^{13}\text{C-NMR}$  (101 MHz,  $\text{CDCl}_3$ ):**  $\delta$  / ppm = 155.0, 143.9, 136.8, 131.3, 130.3, 129.6, 128.6, 128.1, 126.8, 79.4, 74.7, 40.5, 32.2, 27.6, 21.7, 17.2.

**IR (Diamond-ATR, neat):**  $\tilde{\nu}$  /  $\text{cm}^{-1}$  = 3508, 2959, 1353, 1162, 1039, 730, 597, 543.

**MS (ESI):**  $m/z$  (%) = 763 (39), 393 (100), 371 (30), 251 (29), 237 (19), 223 (33), 209 (20).

**HRMS (ESI) for  $\text{C}_{20}\text{H}_{22}\text{N}_2\text{NaO}_3\text{S}$  (393.1243):** 393.1239 ( $\text{M}+\text{H}$ ) $^+$ .

**M.p. ( $^\circ\text{C}$ ):** 183–185.

### 3-Phenyl-1-tosyl-1,2-diazaspiro[4.5]dec-2-en-6-ol (**8b**)

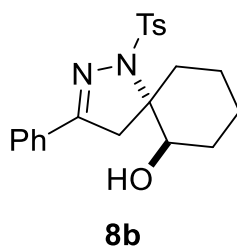

Pyrazoline **8b** was prepared via **GP4**, using hydrazone **7b** (178 mg, 483  $\mu\text{mol}$ ) and  $\text{Mn}(\text{dpm})_3$  (30 mg, 50  $\mu\text{mol}$ ), and the reaction was stirred for 2 h. After work-up, the crude product was purified via column chromatography (hexane:ethyl acetate = 2:8,  $R_f = 0.25$ ) to give **8b** (139 mg, 362  $\mu\text{mol}$ , 75%) as a colorless solid.

**$^1\text{H-NMR}$  (400 MHz,  $\text{CDCl}_3$ ):**  $\delta$  / ppm = 7.93 (d,  $J = 8.1$  Hz, 2H), 7.73 – 7.65 (m, 2H), 7.43 – 7.34 (m, 3H), 7.30 (d,  $J = 8.0$  Hz, 2H), 4.50 – 4.39 (m, 1H), 3.52 (d,  $J = 16.8$  Hz, 1H), 2.88 (d,  $J = 16.8$  Hz, 1H), 2.41 (s, 3H), 2.34 – 2.22 (m, 2H), 2.11 – 1.94 (m, 1H), 1.83 – 1.54 (m, 3H), 1.50 – 1.31 (m, 1H), 1.35 – 1.10 (m, 2H).

**$^{13}\text{C-NMR}$  (101 MHz,  $\text{CDCl}_3$ ):**  $\delta$  / ppm = 154.6, 144.0, 137.2, 131.3, 130.3, 129.6, 128.6, 128.1, 126.7, 78.8, 72.2, 38.9, 33.4, 31.2, 23.7, 23.0, 21.7.

**IR (Diamond-ATR, neat):**  $\tilde{\nu}$  /  $\text{cm}^{-1}$  = 3498, 2933, 2864, 1495, 1364, 1342, 1160, 1093, 1050, 1035, 670, 594, 569, 445.

**MS (ESI):**  $m/z$  (%) = 385 (29), 329 (25), 322 (25), 251 (42), 237 (21), 230 (52), 223 (41), 217 (28), 209 (20), 194 (25), 158 (23).

**HRMS (ESI) for  $\text{C}_{21}\text{H}_{25}\text{N}_2\text{O}_3\text{S}$  (385.1580):** 385.1583 ( $\text{M}+\text{H}$ ) $^+$ .

**M.p. ( $^\circ\text{C}$ ):** 180–183.

## Preparation of Compounds 3a–j

### 3-Phenyl-1-tosyl-4,5-dihydro-1H-pyrazole-5-carbaldehyde (3a)

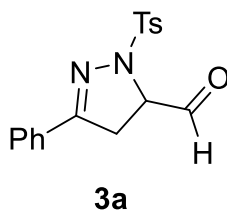

Pyrazoline **3a** was prepared via **GP5**, using hydrazone **1a** (32 mg, 0.10 mmol) and Co(salen) **4**<sup>12</sup> (7.0 mg, 10 μmol), and the reaction was stirred for 1 h. After work-up, the crude product was purified via column chromatography (hexane:ethyl acetate = 7:3,  $R_f$  = 0.3) to give **3a** (23 mg, 70 μmol, 70%) as a light brown oil.

#### Reaction using air:

Hydrazone **1a** (62.0 mg, 197 μmol) and Co(salen) **4** (7.0 mg, 10 μmol) were added to a dry flask and dissolved in *i*PrOH (1 mL). Air was continuously introduced to the solution via needle and the reaction stirred at 25 °C for 1 h. After work-up according to **GP5** the crude product was purified via column chromatography (hexane:ethyl acetate = 7:3,  $R_f$  = 0.3) to give **3a** (37.0 mg, 113 μmol, 57%) as a light brown oil.

**<sup>1</sup>H-NMR (400 MHz, C<sub>6</sub>D<sub>6</sub>):** δ / ppm = 9.67 (d,  $J$  = 2.5 Hz, 1H), 7.90 – 7.83 (m, 2H), 7.35 – 7.28 (m, 2H), 7.07 – 6.95 (m, 3H), 6.68 (d,  $J$  = 8.0 Hz, 2H), 4.06 – 3.95 (m, 1H), 2.38 (dd,  $J$  = 17.2, 10.8 Hz, 1H), 2.12 (dd,  $J$  = 17.2, 11.8 Hz, 1H), 1.75 (s, 3H).

**<sup>13</sup>C-NMR (101 MHz, C<sub>6</sub>D<sub>6</sub>):** δ / ppm = 196.1, 157.1, 144.5, 132.8, 130.8, 130.6, 129.8, 129.2, 128.7, 127.2, 68.4, 34.2, 21.1.

**<sup>1</sup>H-NMR (400 MHz, CDCl<sub>3</sub>):** δ / ppm = 9.90 (d,  $J$  = 1.9 Hz, 1H), 7.82 (d,  $J$  = 8.1 Hz, 2H), 7.70 – 7.63 (m, 2H), 7.48 – 7.28 (m, 5H), 4.30 (ddd,  $J$  = 12.0, 9.9, 1.9 Hz, 1H), 3.37 (dd,  $J$  = 17.3, 10.1 Hz, 1H), 3.17 (dd,  $J$  = 17.3, 12.0 Hz, 1H), 2.41 (s, 3H).

The spectra are in accordance with the literature.<sup>11</sup>

<sup>12</sup> Co(salen) **4** was prepared according to: Chawner, S. J.; Cases-Thomas, M. J.; Bull, J. A. *Eur. J. Org. Chem.* **2017**, 5015-5024.

**Methyl 4-(5-formyl-1-tosyl-4,5-dihydro-1H-pyrazol-3-yl)benzoate (3b)**

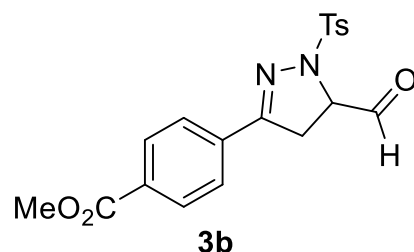

Pyrazoline **3b** was prepared via **GP5**, using hydrazone **1c** (22 mg, 59  $\mu\text{mol}$ ) and Co(salen) **4** (4 mg, 6  $\mu\text{mol}$ ), and the reaction was stirred for 1 h. After work-up, the crude product was purified via column chromatography (hexane:ethyl acetate = 6:4,  $R_f$  = 0.25) to give **3b** (14 mg, 36  $\mu\text{mol}$ , 61%) as a light brown oil.

**$^1\text{H-NMR}$  (400 MHz,  $\text{CDCl}_3$ ):**  $\delta$  / ppm = 9.91 (d,  $J$  = 1.8 Hz, 1H), 8.09 – 8.01 (m, 2H), 7.85 – 7.80 (m, 2H), 7.72 (dq,  $J$  = 8.6, 1.7 Hz, 2H), 7.36 – 7.30 (m, 2H), 4.36 (ddd,  $J$  = 12.0, 10.0, 1.8 Hz, 1H), 3.93 (s, 3H), 3.40 (dd,  $J$  = 17.3, 10.1 Hz, 1H), 3.20 (dd,  $J$  = 17.3, 12.0 Hz, 1H), 2.41 (s, 3H).

**$^{13}\text{C-NMR}$  (101 MHz,  $\text{CDCl}_3$ ):**  $\delta$  / ppm = 196.4, 166.4, 156.8, 145.4, 134.1, 132.3, 131.6, 130.09, 130.06, 128.9, 127.1, 68.0, 52.6, 34.6, 21.8.

**IR (Diamond-ATR, neat):**  $\tilde{\nu}$  /  $\text{cm}^{-1}$  = 2954, 2925, 2853, 1721, 1597, 1436, 1356, 1280, 1168, 1110, 1015, 666, 601, 592.

**HRMS (ESI) for  $\text{C}_{19}\text{H}_{19}\text{N}_2\text{O}_5\text{S}$  (387.1009):** 387.1015 ( $\text{M}+\text{H}$ ) $^+$ .

### 3-(3-Fluorophenyl)-1-tosyl-4,5-dihydro-1H-pyrazole-5-carbaldehyde (**3c**)

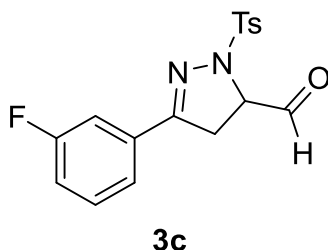

Pyrazoline **3c** was prepared via **GP5**, using hydrazone **1d** (66 mg, 0.20 mmol) and Co(salen) **4** (14 mg, 20  $\mu$ mol), and the reaction was stirred for 1 h. After work-up, the crude product was purified via column chromatography using neutral silica (hexane:ethyl acetate = 8:2–7:3,  $R_f$  (7:3) = 0.2) to give **3c** (32 mg, 92  $\mu$ mol, 46%) as a light brown oil.

**$^1\text{H-NMR}$  (400 MHz,  $\text{C}_6\text{D}_6$ ):**  $\delta$  / ppm = 9.66 (d,  $J$  = 2.4 Hz, 1H), 7.86 – 7.78 (m, 2H), 7.05 (ddd,  $J$  = 9.6, 2.5, 1.5 Hz, 1H), 6.96 (dt,  $J$  = 7.6, 1.4 Hz, 1H), 6.79 – 6.60 (m, 4H), 3.98 (ddd,  $J$  = 11.9, 10.9, 2.4 Hz, 1H), 2.25 (dd,  $J$  = 17.2, 10.9 Hz, 1H), 1.95 (dd,  $J$  = 17.2, 11.9 Hz, 1H), 1.74 (s, 3H).

**$^{13}\text{C-NMR}$  (101 MHz,  $\text{C}_6\text{D}_6$ ):**  $\delta$  / ppm = 195.8, 163.0 (d,  $J$  = 246.5 Hz), 155.9 (d,  $J$  = 3.0 Hz), 144.7, 132.76, 132.75, 130.4 (d,  $J$  = 8.1 Hz), 129.8, 129.2, 122.8 (d,  $J$  = 3.0 Hz), 117.6 (d,  $J$  = 21.2 Hz), 114.0 (d,  $J$  = 23.0 Hz), 68.4, 34.0, 21.1.

**IR (Diamond-ATR, neat):**  $\tilde{\nu}$  /  $\text{cm}^{-1}$  = 3484, 2924, 2853, 1735, 1494, 1359, 1147, 1019, 788, 672, 593.

**MS (ESI):**  $m/z$  (%) = 347 (76), 295 (26), 177 (18), 175 (24), 163 (18), 155 (18).

**HRMS (ESI) for  $\text{C}_{17}\text{H}_{16}\text{FN}_2\text{O}_3\text{S}$  (347.0860):** 347.0859 (M+H) $^+$ .

### 3-(4-Ethylphenyl)-1-tosyl-4,5-dihydro-1H-pyrazole-5-carbaldehyde (**3d**)

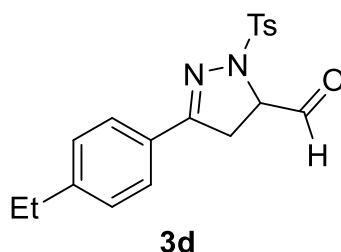

Pyrazoline **3d** was prepared via **GP5**, using hydrazone **1e** (68 mg, 0.20 mmol) and Co(salen) **4** (14 mg, 20  $\mu$ mol), and the reaction was stirred for 1 h. After work-up, the crude product was purified via column chromatography (hexane:ethyl acetate = 6:4,  $R_f$  = 0.2) to give **3d** (45 mg, 0.13 mmol, 65%) as a light brown oil.

**$^1\text{H-NMR}$  (400 MHz,  $\text{C}_6\text{D}_6$ ):**  $\delta$  / ppm = 9.69 (d,  $J$  = 2.5 Hz, 1H), 7.92 – 7.81 (m, 2H), 7.38 – 7.31 (m, 2H), 6.96 – 6.88 (m, 2H), 6.73 – 6.66 (m, 2H), 4.02 (ddd,  $J$  = 11.8, 10.7, 2.5 Hz, 1H), 2.45 (dd,  $J$  = 17.1, 10.8 Hz, 1H), 2.34 (q,  $J$  = 7.6 Hz, 2H), 2.19 (dd,  $J$  = 17.2, 11.8 Hz, 1H), 1.76 (s, 3H), 1.00 (t,  $J$  = 7.6 Hz, 3H).

**$^{13}\text{C-NMR}$  (101 MHz,  $\text{C}_6\text{D}_6$ ):**  $\delta$  / ppm = 196.2, 157.3, 147.5, 144.5, 132.8, 129.8, 129.2, 128.2, 127.4, 68.4, 34.4, 29.0, 21.1, 15.5.

**IR (Diamond-ATR, neat):**  $\tilde{\nu}$  /  $\text{cm}^{-1}$  = 3483, 2965, 2873, 1736, 1611, 1355, 1167, 1020, 836, 860, 666, 591.

**MS (ESI):**  $m/z$  (%) = 357 (85), 295 (59), 227 (15), 185 (30), 177 (36), 173 (26).

**HRMS (ESI) for  $\text{C}_{19}\text{H}_{21}\text{N}_2\text{O}_3\text{S}$  (357.1267):** 357.1264 ( $\text{M}+\text{H}$ ) $^+$ .

**4-(5-Formyl-1-tosyl-4,5-dihydro-1H-pyrazol-3-yl)benzonitrile (3e)**

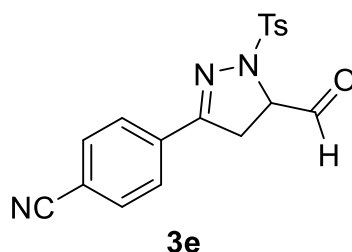

Pyrazoline **3e** was prepared via **GP5**, using hydrazone **1f** (34 mg, 0.10 mmol) and Co(salen) **4** (7.0 mg, 10  $\mu$ mol), and the reaction was stirred for 1 h. After work-up, the crude product was purified via column chromatography (hexane:ethyl acetate = 6:4,  $R_f$  = 0.25) to give **3e** (18 mg, 51  $\mu$ mol, 51%) as a light brown oil.

**$^1\text{H-NMR}$  (400 MHz,  $\text{CDCl}_3$ ):**  $\delta$  / ppm = 9.91 (d,  $J$  = 1.6 Hz, 1H), 7.85 – 7.79 (m, 2H), 7.79 – 7.73 (m, 2H), 7.71 – 7.65 (m, 2H), 7.37 – 7.32 (m, 2H), 4.41 (ddd,  $J$  = 12.2, 10.0, 1.7 Hz, 1H), 3.40 (dd,  $J$  = 17.4, 10.0 Hz, 1H), 3.19 (dd,  $J$  = 17.4, 12.2 Hz, 1H), 2.42 (s, 3H).

**$^{13}\text{C-NMR}$  (101 MHz,  $\text{CDCl}_3$ ):**  $\delta$  / ppm = 196.1, 155.8, 145.6, 134.2, 132.7, 131.6, 130.1, 128.9, 127.5, 118.2, 114.5, 68.1, 34.3, 21.8.

**IR (Diamond-ATR, neat):**  $\tilde{\nu}$  /  $\text{cm}^{-1}$  = 3491, 2925, 2229, 1736, 1596, 1508, 1357, 1167, 1056, 911, 841, 667, 587.

**MS (ESI):**  $m/z$  (%) = 354 (66), 336 (10), 212 (13), 182 (24), 170 (14), 155 (65).

**HRMS (ESI) for  $\text{C}_{18}\text{H}_{16}\text{N}_3\text{O}_3\text{S}$  (354.0907):** 354.0910 ( $\text{M}+\text{H}$ ) $^+$ .

**3-(3,5-Dimethylphenyl)-4,4-dimethyl-1-tosyl-4,5-dihydro-1H-pyrazole-5-carbaldehyde (3f)**

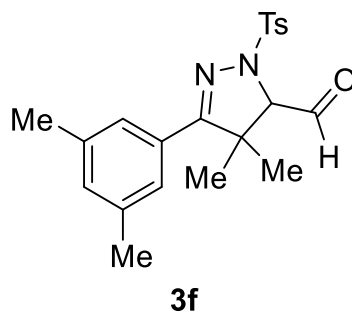

Pyrazoline **3f** was prepared via **GP5**, using hydrazone **1o** (37 mg, 0.10 mmol) and Co(salen) **4** (7 mg, 10  $\mu$ mol), and the reaction was stirred for 1 h. After work-up, the crude product was purified via column chromatography (hexane:ethyl acetate = 9:1,  $R_f$  = 0.25) to give **3f** (32 mg, 83  $\mu$ mol, 83%) as an off white solid.

**$^1\text{H-NMR}$  (500 MHz,  $\text{CDCl}_3$ ):**  $\delta$  / ppm = 9.93 (dd,  $J$  = 3.8, 1.1 Hz, 1H), 7.82 – 7.76 (m, 2H), 7.34 (d,  $J$  = 7.7 Hz, 2H), 7.18 (d,  $J$  = 1.6 Hz, 2H), 7.07 – 7.03 (m, 1H), 3.37 (dd,  $J$  = 3.9, 1.1 Hz, 1H), 2.43 (s, 3H), 2.31 (s, 6H), 1.38 (s, 3H), 1.30 (s, 3H).

**$^{13}\text{C-NMR}$  (126 MHz,  $\text{CDCl}_3$ ):**  $\delta$  / ppm = 198.4, 164.4, 145.2, 138.4, 132.3, 130.6, 129.8, 129.4, 129.2, 125.5, 77.5, 54.2, 25.1, 21.8, 21.5, 20.5.

**IR (Diamond-ATR, neat):**  $\tilde{\nu}$  /  $\text{cm}^{-1}$  = 2969, 2922, 2871, 1731, 1571, 1598, 1363, 1167, 1089, 994, 853, 670, 661, 587.

**MS (ESI):**  $m/z$  (%) = 385 (100), 371 (20), 213 (24).

**HRMS (ESI) for  $\text{C}_{21}\text{H}_{25}\text{N}_2\text{O}_3\text{S}$  (385.1580):** 385.1579 ( $\text{M}+\text{H}$ ) $^+$ .

**M.p. ( $^\circ\text{C}$ ):** 163–165.



### 3-(Furan-2-yl)-1-tosyl-4,5-dihydro-1H-pyrazole-5-carbaldehyde (**3g**)

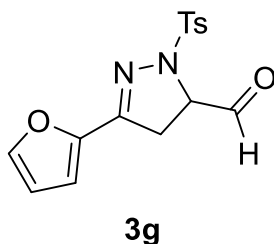

Pyrazoline **3g** was prepared via **GP5**, using hydrazone **1h** (24 mg, 79  $\mu$ mol) and Co(salen) **4** (5.6 mg, 8.0  $\mu$ mol), and the reaction was stirred for 1 h. After work-up, the crude product was purified via column chromatography (hexane:ethyl acetate = 6:4,  $R_f$  = 0.25) to give **3g** (16 mg, 50  $\mu$ mol, 63%) as a light brown oil.

**$^1\text{H-NMR}$  (400 MHz,  $\text{CDCl}_3$ ):**  $\delta$  / ppm = 9.87 (d,  $J$  = 1.8 Hz, 1H), 7.82 – 7.75 (m, 2H), 7.61 (t,  $J$  = 1.2 Hz, 1H), 7.44 (t,  $J$  = 1.7 Hz, 1H), 7.32 (d,  $J$  = 8.1 Hz, 2H), 6.78 (dd,  $J$  = 2.0, 0.8 Hz, 1H), 4.25 (ddd,  $J$  = 11.7, 9.7, 1.8 Hz, 1H), 3.25 (dd,  $J$  = 17.1, 9.8 Hz, 1H), 2.98 (dd,  $J$  = 17.1, 11.9 Hz, 1H), 2.42 (s, 3H).

**$^{13}\text{C-NMR}$  (101 MHz,  $\text{CDCl}_3$ ):**  $\delta$  / ppm = 196.7, 151.9, 145.2, 144.6, 143.8, 131.4, 130.0, 129.0, 118.4, 108.4, 67.4, 35.2, 21.8.

**IR (Diamond-ATR, neat):**  $\tilde{\nu}$  /  $\text{cm}^{-1}$  = 3488, 2924, 1735, 1620, 1597, 1357, 1307, 1166, 846, 848, 667, 596.

**MS (ESI):**  $m/z$  (%) = 319 (34), 299 (16), 219 (12), 147 (12), 142 (14), 135 (12).

**HRMS (ESI) for  $\text{C}_{15}\text{H}_{15}\text{N}_2\text{O}_4\text{S}$  (319.0747):** 319.0740 ( $\text{M}+\text{H}$ ) $^+$ .

**5-Methyl-3-(thiophen-2-yl)-1-tosyl-4,5-dihydro-1H-pyrazole-5-carbaldehyde (3h)**

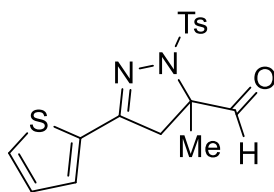

**3h**

Pyrazoline **3h** was prepared via **GP5**, using hydrazone **1g** (34.0 mg, 102  $\mu$ mol) and Co(salen) **4** (7.0 mg, 10  $\mu$ mol), and the reaction was stirred for 1 h. After work-up, the crude product was purified via column chromatography (hexane:ethyl acetate = 8:2,  $R_f$  = 0.3) to give **3h** (19.0 mg, 545  $\mu$ mol, 53%) as a light brown oil.

**$^1\text{H-NMR}$  (400 MHz,  $\text{CDCl}_3$ ):**  $\delta$  / ppm = 9.86 (s, 1H), 7.94 – 7.86 (m, 2H), 7.50 (dd,  $J$  = 5.1, 1.3 Hz, 1H), 7.45 (dd,  $J$  = 2.9, 1.3 Hz, 1H), 7.35 (dd,  $J$  = 5.1, 2.9 Hz, 1H), 7.33 – 7.28 (m, 2H), 3.48 (d,  $J$  = 16.8 Hz, 1H), 2.86 (d,  $J$  = 16.8 Hz, 1H), 2.42 (s, 3H), 1.47 (s, 3H).

**$^{13}\text{C-NMR}$  (101 MHz,  $\text{CDCl}_3$ ):**  $\delta$  / ppm = 196.5, 150.1, 144.4, 136.5, 133.0, 129.7, 128.2, 127.1, 126.5, 125.9, 75.1, 43.9, 21.7, 18.9.

**IR (Diamond-ATR, neat):**  $\tilde{\nu}$  /  $\text{cm}^{-1}$  = 3106, 2824, 2854, 1737, 1597, 1352, 1320, 1163, 1091, 785, 731, 644, 599.

**MS (ESI):**  $m/z$  (%) = 349 (84), 331 (73), 177 (17), 165 (76), 155 (22).

**HRMS (ESI) for  $\text{C}_{16}\text{H}_{17}\text{N}_2\text{O}_3\text{S}_2$  (349.0675):** 349.0673 ( $\text{M}+\text{H}$ ) $^+$ .

**1-(Methylsulfonyl)-3-phenyl-4,5-dihydro-1H-pyrazole-5-carbaldehyde (3i)**

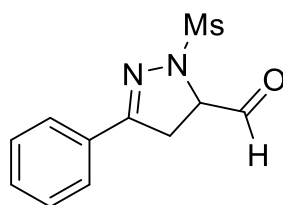

**3i**

Pyrazoline **3i** was prepared via **GP5**, using hydrazone **1r** (26 mg, 0.11 mmol) and Co(salen) **4** (7.0 mg, 10  $\mu$ mol), and the reaction was stirred for 1 h. After work-up, the crude product was purified via column chromatography (hexane:ethyl acetate = 6:4,  $R_f$  = 0.35) to give **3i** (13 mg, 52  $\mu$ mol, 47%) as a light yellow oil.

**$^1\text{H-NMR}$  (400 MHz,  $\text{CDCl}_3$ ):**  $\delta$  / ppm = 9.79 (d,  $J$  = 1.4 Hz, 1H), 7.76 – 7.72 (m, 2H), 7.50 – 7.39 (m, 3H), 4.79 (td,  $J$  = 10.6, 1.4 Hz, 1H), 3.56 – 3.46 (m, 2H), 3.22 (s, 3H).

**$^{13}\text{C-NMR}$  (101 MHz,  $\text{CDCl}_3$ ):**  $\delta$  / ppm = 196.3, 158.2, 131.5, 129.9, 129.0, 127.3, 66.2, 37.5, 34.8.

**IR (Diamond-ATR, neat):**  $\tilde{\nu}$  /  $\text{cm}^{-1}$  = 3475, 3026, 2930, 2852, 1735, 1448, 1348, 1164, 1011, 757, 692, 561, 517.

**MS (ESI):**  $m/z$  (%) = 253 (27), 223 (10), 159 (31), 145 (9).

**HRMS (ESI) for  $\text{C}_{11}\text{H}_{13}\text{N}_2\text{O}_3\text{S}$  (253.0641):** 253.0641 ( $\text{M}+\text{H}$ ) $^+$ .

**1-((4-Nitrophenyl)sulfonyl)-3-phenyl-4,5-dihydro-1H-pyrazole-5-carbaldehyde (3j)**

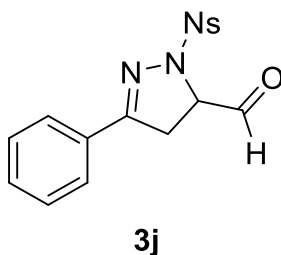

Pyrazoline **3j** was prepared via **GP5**, using hydrazone **1p** (38.0 mg, 110  $\mu$ mol) and Co(salen) **4** (7.0 mg, 10  $\mu$ mol), and the reaction was stirred for 1 h. After work-up, the crude product was purified via column chromatography (hexane:ethyl acetate = 6:4,  $R_f$  = 0.3) to give **3j** (18.5 mg, 515  $\mu$ mol, 47%) as a light yellow oil.

**$^1\text{H-NMR}$  (400 MHz,  $\text{CDCl}_3$ ):**  $\delta$  / ppm = 9.89 (d,  $J$  = 1.8 Hz, 1H), 8.41 – 8.36 (m, 2H), 8.19 – 8.14 (m, 2H), 7.70 – 7.61 (m, 2H), 7.51 – 7.35 (m, 3H), 4.39 (ddd,  $J$  = 11.7, 9.7, 1.8 Hz, 1H), 3.44 (dd,  $J$  = 17.5, 9.7 Hz, 1H), 3.28 (dd,  $J$  = 17.5, 12.0 Hz, 1H).

**$^{13}\text{C-NMR}$  (101 MHz,  $\text{CDCl}_3$ ):**  $\delta$  / ppm = 195.6, 158.7, 151.0, 140.7, 131.8, 130.2, 129.5, 129.1, 127.2, 124.5, 67.7, 34.9.

**IR (Diamond-ATR, neat):**  $\tilde{\nu}$  /  $\text{cm}^{-1}$  = 3482, 3106, 926, 2854, 1737, 1688, 1530, 1349, 1175, 1108, 956, 910, 763, 737, 615, 585.

**MS (ESI):**  $m/z$  (%) = 360 (7), 322 (45), 251 (15), 223 (17), 194 (21), 173 (14), 159 (10), 142 (100).

**HRMS (ESI) for  $\text{C}_{16}\text{H}_{14}\text{N}_3\text{O}_5\text{S}$  (360.0649):** 360.0647 ( $\text{M}+\text{H}$ ) $^+$ .

## Preparation of Compounds 9a–g

### 3-Phenyl-5-((phenylthio)methyl)-1-tosyl-4,5-dihydro-1H-pyrazole (9a)

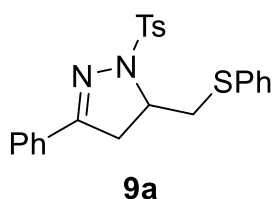

Pyrazoline **9a** was prepared via **GP6**, using hydrazone **1a** (32 mg, 0.10 mmol),  $\text{Mn}(\text{dpm})_3$  (6.0 mg, 10  $\mu\text{mol}$ ),  $t\text{BuOOH}$  (5.5 M in decane, 40  $\mu\text{L}$ , 0.20 mmol), and diphenyl disulfide (38 mg, 0.20 mmol), and the reaction was stirred for 2 h. After work-up, the crude product was purified via column chromatography (hexane:ethyl acetate = 9:1 + 1% trimethylamine,  $R_f = 0.2$ ) to give **9a** (24.7 mg, 58  $\mu\text{mol}$ , 58%) as a colorless oil.

**$^1\text{H-NMR}$  (400 MHz,  $\text{CDCl}_3$ ):**  $\delta$  / ppm = 7.66 – 7.59 (m, 4H), 7.51 – 7.46 (m, 2H), 7.43 – 7.27 (m, 6H), 7.21 – 7.16 (m, 2H), 4.02 (dd,  $J = 13.7, 3.2$  Hz, 1H), 3.91 (tdd,  $J = 10.6, 9.3, 3.2$  Hz, 1H), 3.22 (dd,  $J = 17.5, 10.7$  Hz, 1H), 3.09 – 2.98 (m, 2H), 2.35 (s, 3H).

**$^{13}\text{C-NMR}$  (101 MHz,  $\text{CDCl}_3$ ):**  $\delta$  / ppm = 157.8, 144.4, 134.4, 131.7, 130.82, 130.78, 129.9, 129.6, 129.3, 128.8 (2C), 127.1, 126.8, 61.1, 39.9, 38.7, 21.7.

**IR (Diamond-ATR, neat):**  $\tilde{\nu}$  /  $\text{cm}^{-1}$  = 3059, 2924, 2854, 1597, 1401, 1358, 1167, 908, 760, 691, 591.

**MS (ESI):**  $m/z$  (%) = 423 (86), 371 (17), 299 (10), 145 (11).

**HRMS (ESI) for  $\text{C}_{23}\text{H}_{23}\text{N}_2\text{O}_2\text{S}_2$  (423.1195):** 423.1194 ( $\text{M}+\text{H}$ ) $^+$ .

**O-Ethyl S-((3-phenyl-1-tosyl-4,5-dihydro-1H-pyrazol-5-yl)methyl) carbonodithioate (9b)**

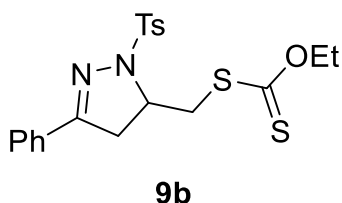

Pyrazoline **9b** was prepared via **GP6**, using hydrazone **1a** (32 mg, 0.10 mmol), Mn(dpm)<sub>3</sub> (6.0 mg, 10 μmol), tBuOOH (5.5 M in decane, 40 μL, 0.20 mmol), and S-benzyl O-ethyl carbonodithioate<sup>13</sup> (42 mg, 0.20 mmol), and the reaction was stirred for 2 h. After work-up, the crude product was purified via column chromatography (hexane:ethyl acetate = 9:1 + 1% trimethylamine, R<sub>f</sub> = 0.2) to give **9b** (25 mg, 58 μmol, 58%) as a colorless oil.

**<sup>1</sup>H-NMR (400 MHz, CDCl<sub>3</sub>):** δ / ppm = 7.86 – 7.79 (m, 2H), 7.68 – 7.61 (m, 2H), 7.44 – 7.33 (m, 3H), 7.31 – 7.27 (m, 2H), 4.68 (qd, *J* = 7.1, 1.4 Hz, 2H), 4.32 – 4.19 (m, 1H), 4.14 (dd, *J* = 14.1, 3.6 Hz, 1H), 3.54 (dd, *J* = 14.1, 8.4 Hz, 1H), 3.18 (dd, *J* = 17.3, 10.7 Hz, 1H), 3.05 (dd, *J* = 17.3, 9.3 Hz, 1H), 2.39 (s, 3H), 1.45 (t, *J* = 7.1 Hz, 3H).

**<sup>13</sup>C-NMR (101 MHz, CDCl<sub>3</sub>):** δ / ppm = 213.6, 157.7, 144.6, 132.1, 130.9, 130.7, 129.7, 128.9, 128.8, 127.1, 70.8, 60.6, 40.3, 39.0, 21.8, 13.9.

**IR (Diamond-ATR, neat):**  $\tilde{\nu}$  / cm<sup>-1</sup> = 2923, 2852, 1770, 1448, 1360, 1229, 1169, 1048, 853, 761, 676, 592.

**MS (ESI):** *m/z* (%) = 457 (100), 445 (31), 435 (85), 371 (33), 347 (23), 142 (69).

**HRMS (ESI) for C<sub>20</sub>H<sub>22</sub>N<sub>2</sub>NaO<sub>3</sub>S<sub>3</sub> (457.0685):** 457.0684 (M+H)<sup>+</sup>.

<sup>13</sup> Chênevert, R.; Paquin, R.; Rodrigue, A. *Synth. Comm.* **1981**, *11*, 817-821.

**S-ethyl S-((3-phenyl-1-tosyl-4,5-dihydro-1H-pyrazol-5-yl)methyl) carbonodithioate (9c)**

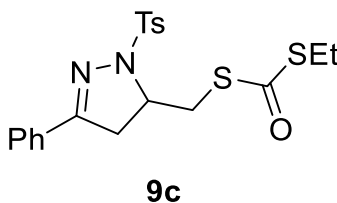

Pyrazoline **9c** was prepared via **GP6**, using hydrazone **1a** (32 mg, 0.10 mmol),  $\text{Mn}(\text{dpm})_3$  (6.0 mg, 10  $\mu\text{mol}$ ),  $t\text{BuOOH}$  (5.5 M in decane, 40  $\mu\text{L}$ , 0.20 mmol), and *O*-benzyl *S*-ethyl carbonodithioate<sup>14</sup> (42 mg, 0.20 mmol), and the reaction was stirred for 2 h. After work-up, the crude product was purified via column chromatography (hexane:ethyl acetate = 9:1 + 1% trimethylamine,  $R_f = 0.2$ ) to give **9c** (38 mg, 84  $\mu\text{mol}$ , 84%) as a colorless oil.

**<sup>1</sup>H-NMR (400 MHz,  $\text{CDCl}_3$ ):**  $\delta$  / ppm = 7.85 – 7.79 (m, 2H), 7.66 – 7.61 (m, 2H), 7.44 – 7.33 (m, 3H), 7.31 – 7.27 (m, 2H), 4.11 (dddd,  $J = 10.9, 9.5, 8.1, 3.2$  Hz, 1H), 3.90 (dd,  $J = 14.0, 3.2$  Hz, 1H), 3.40 (dd,  $J = 14.0, 8.1$  Hz, 1H), 3.16 (dd,  $J = 17.3, 10.8$  Hz, 1H), 3.07 – 2.91 (m, 3H), 2.39 (s, 3H), 1.31 (t,  $J = 7.4$  Hz, 3H).

**<sup>13</sup>C-NMR (101 MHz,  $\text{CDCl}_3$ ):**  $\delta$  / ppm = 189.2, 157.7, 144.6, 131.9, 130.8, 130.7, 129.7, 128.9, 128.7, 127.1, 61.5, 38.9, 34.8, 25.7, 21.7, 15.0.

**IR (Diamond-ATR, neat):**  $\tilde{\nu}$  /  $\text{cm}^{-1}$  = 3064, 2964, 2926, 1645, 1358, 1169, 872, 675, 592.

**MS (ESI):**  $m/z$  (%) = 457 (100), 445 (29), 435 (66), 371 (28), 299 (16), 142 (19).

**HRMS (ESI) for  $\text{C}_{20}\text{H}_{22}\text{N}_2\text{NaO}_3\text{S}_3$  (457.0685):** 457.0692 ( $\text{M}+\text{Na}$ )<sup>+</sup>.

<sup>14</sup> Lu, X.; Ni, Z. *Synthesis* **1987**, 1987, 66-68.

## 5-(Bicyclo[1.1.1]pentan-1-ylmethyl)-3-phenyl-1-tosyl-4,5-dihydro-1H-pyrazole (9d)

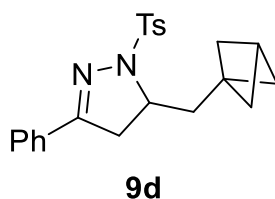

Pyrazoline **9d** was prepared via **GP6**, using hydrazone **1a** (32 mg, 0.10 mmol),  $\text{Mn}(\text{dpm})_3$  (6.0 mg, 10  $\mu\text{mol}$ ),  $t\text{BuOOH}$  (5.5 M in decane, 20  $\mu\text{L}$ , 0.10 mmol), and [1.1.1]propellane (0.57 M in  $\text{Bu}_2\text{O}$ , 0.185 mL, 0.105 mmol)<sup>15</sup>, and the reaction was stirred for 2 h. After work-up, the crude product was purified via column chromatography (hexane:ethyl acetate = 10:0.5–9:1,  $R_f = 0.2$ ) to give **9d** (22 mg, 58  $\mu\text{mol}$ , 58%) as a colorless solid.

**$^1\text{H-NMR}$  (400 MHz,  $\text{CDCl}_3$ ):**  $\delta$  / ppm = 7.81 – 7.75 (m, 2H), 7.68 – 7.63 (m, 2H), 7.43 – 7.34 (m, 3H), 7.30 – 7.26 (m, 2H), 3.73 (tdd,  $J = 10.7, 9.7, 2.9$  Hz, 1H), 3.15 (dd,  $J = 17.1, 10.8$  Hz, 1H), 2.79 (dd,  $J = 17.1, 9.7$  Hz, 1H), 2.52 (d,  $J = 12.2$  Hz, 2H), 2.38 (s, 3H), 1.94 – 1.83 (m, 1H), 1.76 (s, 6H).

**$^{13}\text{C-NMR}$  (101 MHz,  $\text{CDCl}_3$ ):**  $\delta$  / ppm = 157.7, 144.2, 132.3, 131.1, 130.6, 129.6, 128.8, 128.7, 127.0, 60.9, 51.3, 42.9, 40.0, 38.9, 29.0, 21.7.

**IR (Diamond-ATR, neat):**  $\tilde{\nu}$  /  $\text{cm}^{-1}$  = 2961, 2906, 2868, 1598, 1448, 1355, 1167, 1092, 851, 692, 669, 591.

**MS (ESI):**  $m/z$  (%) = 381 (100), 226 (11), 142 (18).

**HRMS (ESI) for  $\text{C}_{22}\text{H}_{25}\text{N}_2\text{O}_2\text{S}$  (381.1631):** 381.1627 ( $\text{M}+\text{H}$ )<sup>+</sup>.

**M.p. ( $^\circ\text{C}$ ):** 153–155.

<sup>15</sup> Makarov, I. S.; Brocklehurst, C. E.; Karaghiosoff, K.; Koch, G.; Knochel, P. *Angew. Chem., Int. Ed.* **2017**, *56*, 12774-12777.



### 5-(Iodomethyl)-3-phenyl-1-tosyl-4,5-dihydro-1H-pyrazole (9e)

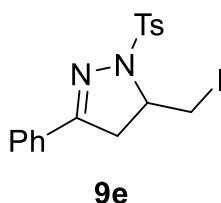

Pyrazoline **9e** was prepared via **GP6**, using hydrazone **1a** (34.0 mg, 108  $\mu\text{mol}$ ),  $\text{Mn}(\text{dpm})_3$  (6.0 mg, 10  $\mu\text{mol}$ ),  $t\text{BuOOH}$  (5.5 M in decane, 40  $\mu\text{L}$ , 0.20 mmol), and allyl iodide (40  $\mu\text{L}$ , 0.40 mmol), and the reaction was stirred for 1.5 h. After work-up, the crude product was purified via column chromatography (hexane:ethyl acetate = 9:1,  $R_f$  = 0.25) to give **9e** (37.0 mg, 84.0  $\mu\text{mol}$ , 78%) as a colorless oil.

**$^1\text{H-NMR}$  (400 MHz,  $\text{CDCl}_3$ ):**  $\delta$  / ppm = 7.84 – 7.77 (m, 2H), 7.70 – 7.63 (m, 2H), 7.46 – 7.34 (m, 3H), 7.30 (d,  $J$  = 8.0 Hz, 2H), 4.04 (dtd,  $J$  = 10.7, 9.1, 3.2 Hz, 1H), 3.83 (dd,  $J$  = 9.9, 3.2 Hz, 1H), 3.45 (t,  $J$  = 9.7 Hz, 1H), 3.32 (dd,  $J$  = 17.5, 10.8 Hz, 1H), 3.00 (dd,  $J$  = 17.5, 8.8 Hz, 1H), 2.39 (s, 3H).

**$^{13}\text{C-NMR}$  (101 MHz,  $\text{CDCl}_3$ ):**  $\delta$  / ppm = 156.8, 144.7, 132.1, 130.9, 130.6, 129.8, 128.80, 128.75, 127.1, 62.3, 41.7, 21.8, 9.9.

**IR (Diamond-ATR, neat):**  $\tilde{\nu}$  /  $\text{cm}^{-1}$  = 3031, 2923, 2853, 1597, 1448, 1401, 1356, 1166, 1010, 908, 730, 691, 681, 583, 548.

**MS (ESI):**  $m/z$  (%) = 441 (100), 371 (8), 285 (21), 284 (9).

**HRMS (ESI) for  $\text{C}_{17}\text{H}_{18}\text{IN}_2\text{O}_2\text{S}$  (441.0128):** 441.0119 ( $\text{M}+\text{H}$ ) $^+$ .

## 5-Methyl-3-phenyl-1-tosyl-4,5-dihydro-1H-pyrazole (9f)

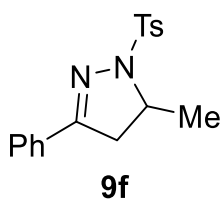

Pyrazoline **9f** was prepared via **GP6**, using hydrazone **1a** (64.0 mg, 200  $\mu$ mol),  $\text{Mn}(\text{dpm})_3$  (12 mg, 20  $\mu$ mol), and *t*BuOOH (5.5 M in decane, 70  $\mu$ L, 0.40 mmol), and the reaction was stirred for 3 h. After work-up, the crude product was purified via column chromatography (hexane:ethyl acetate = 8:2,  $R_f$  = 0.25) to give **9f** (35.0 mg, 111  $\mu$ mol, 56%) as a colorless oil.

**$^1\text{H-NMR}$  (400 MHz,  $\text{CDCl}_3$ ):**  $\delta$  / ppm = 7.83 – 7.77 (m, 2H), 7.67 – 7.62 (m, 2H), 7.43 – 7.34 (m, 3H), 7.28 (m, 2H), 3.90 (ddq,  $J$  = 10.5, 9.7, 6.2 Hz, 1H), 3.18 (dd,  $J$  = 16.9, 10.6 Hz, 1H), 2.77 (dd,  $J$  = 16.9, 9.8 Hz, 1H), 2.38 (s, 3H), 1.64 (d,  $J$  = 6.2 Hz, 3H).

**$^{13}\text{C-NMR}$  (101 MHz,  $\text{CDCl}_3$ ):**  $\delta$  / ppm = 157.3, 144.2, 132.5, 131.2, 130.6, 129.6, 128.8, 128.7, 127.0, 58.4, 41.7, 22.0, 21.7.

The spectra are in agreement with the literature.<sup>3</sup>

Control experiment:

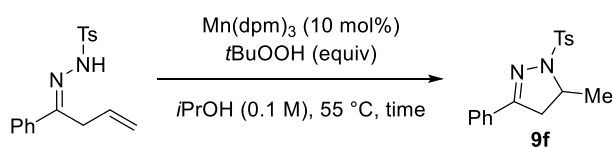

| entry | <i>t</i> BuOOH | time | yield ( <b>9f</b> ) |
|-------|----------------|------|---------------------|
| 1     | -              | 14 h | <5% <sup>a</sup>    |
| 2     | 2 equiv        | 3 h  | 56%                 |

<sup>a</sup> alongside starting material.

## Preparation of Compounds A, B, C, 9g

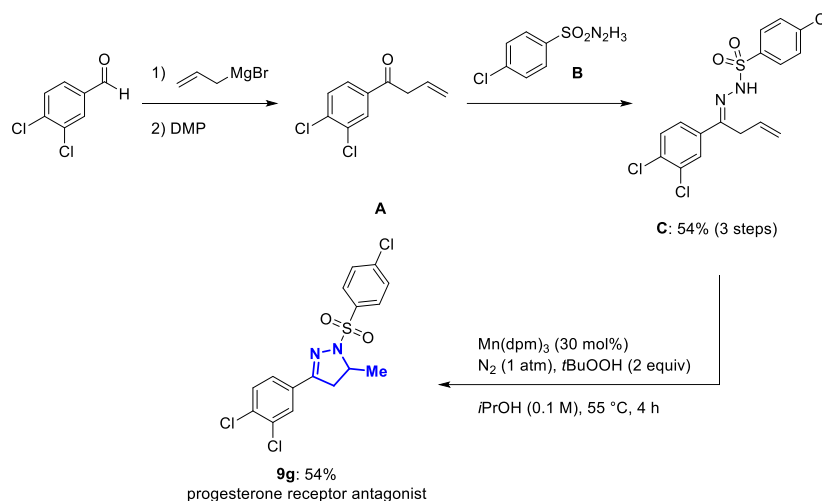

## 4-chlorobenzenesulfonylhydrazide (B)

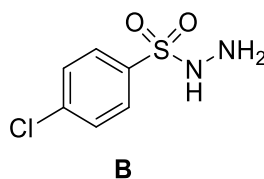

Hydrazide **B** was prepared according to a literature procedure:<sup>16</sup> 4-Chlorobenzenesulfonyl chloride (4.22 g, 20.0 mmol) was dissolved in THF (20 mL) and cooled to 0 °C. Then, hydrazine monohydrate (2.50 mL, 50.0 mmol) was added dropwise and the mixture stirred for additional 45 min. After dilution with THF (20 mL) at the same temperature, the mixture was washed with water (2 x 10 mL) and brine (20 mL), the organic phase separated, dried with Na<sub>2</sub>SO<sub>4</sub>, filtered and the solvents removed in vacuo, affording **B** (3.51 g, 16.9 mmol, 84%).

<sup>1</sup>H-NMR (400 MHz, CDCl<sub>3</sub>): δ / ppm = 8.47 (s, 1H), 7.84 – 7.76 (m, 2H), 7.72 – 7.64 (m, 2H), 4.19 (s, 2H).

The spectra are in agreement with the literature.<sup>17</sup>

<sup>16</sup> Terent'ev, A. O.; Mulina, O. M.; Pirygach, D. A.; Demchuk, D. V.; Syroeshkin, M. A.; Nikishin, G. I. *RSC Adv.* **2016**, *6*, 93476-93485.

<sup>17</sup> Mulina, O. M.; Zhironkina, N. V.; Paveliev, S. A.; Demchuk, D. V.; Terent'ev, A. O. *Org. Lett.* **2020**, *22*, 1818-1824.

### 1-(3,4-Dichlorophenyl)but-3-en-1-one (**A**)

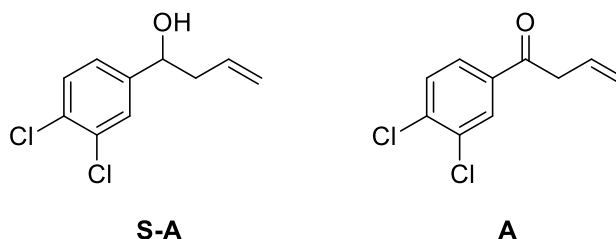

3,4-Dichlorobenzaldehyde (1.75 g, 10.0 mmol) was dissolved in Et<sub>2</sub>O (100 mL) and cooled to 0 °C. Allylmagnesium bromide (12.0 mL, 1 M in Et<sub>2</sub>O) was added dropwise over 30 min using a syringe pump and the reaction stirred for additional 60 min, whilst slowly warming to 25 °C. The reaction mixture was quenched with aq. sat. NH<sub>4</sub>Cl (20 mL) and extracted with ethyl acetate (3 x 30 mL). The organic phase was then dried over Na<sub>2</sub>SO<sub>4</sub>, filtered, and concentrated in vacuo. The crude product was purified by flash column chromatography on silica gel (hexane:ethyl acetate = 9:1, R<sub>f</sub> = 0.3) to give **S-A** (1.66 g, 7.64 mmol, 76%) as a colorless oil.

**<sup>1</sup>H-NMR (400 MHz, CDCl<sub>3</sub>):** δ / ppm = 7.47 (dd, *J* = 2.1, 0.7 Hz, 1H), 7.41 (d, *J* = 8.3 Hz, 1H), 7.19 (ddd, *J* = 8.2, 2.1, 0.6 Hz, 1H), 5.85 – 5.70 (m, 1H), 5.22 – 5.13 (m, 2H), 4.71 (ddd, *J* = 8.0, 4.2, 3.2 Hz, 1H), 2.57 – 2.37 (m, 2H), 2.09 (d, *J* = 3.3 Hz, 1H).

The spectra are in agreement with the literature.<sup>18</sup>

Ketone **A** was prepared via **GP2**, using **S-A** (722 mg, 3.33 mmol) and DMP (2.12 g, 5.00 mmol) and the reaction was stirred for 2 h. After work-up, the crude product was purified via column chromatography (hexane:ethyl acetate = 10:0.4, R<sub>f</sub> = 0.35) to give **A** (652 g, 3.06 mmol, 92%) as a colorless oil.

**<sup>1</sup>H-NMR (400 MHz, CDCl<sub>3</sub>):** δ / ppm = 8.04 (d, *J* = 2.1 Hz, 1H), 7.79 (dd, *J* = 8.4, 2.0 Hz, 1H), 7.55 (d, *J* = 8.3 Hz, 1H), 6.05 (ddt, *J* = 17.0, 10.3, 6.7 Hz, 1H), 5.32 – 5.18 (m, 2H), 3.72 (dt, *J* = 6.7, 1.4 Hz, 2H).

<sup>18</sup> Lanfranchi, D. A.; Bour, C.; Boff, B.; Hanquet, G. *Eur. J. Org. Chem.* **2010**, 2010, 5232-5247.

**<sup>13</sup>C-NMR (101 MHz, CDCl<sub>3</sub>):** δ / ppm = 195.9, 137.9, 136.2, 133.5, 130.9, 130.45, 130.37, 127.5, 119.5, 43.5.

**IR (Diamond-ATR, neat):**  $\tilde{\nu}$  / cm<sup>-1</sup> = 3082, 2983, 1688, 1583, 1375, 1199, 1030, 917, 815, 676, 613.

**MS (ESI):** m/z (%) = 236 (33), 203 (35), 117 (63), 173 (100).

**HRMS (ESI) for C<sub>10</sub>H<sub>8</sub>Cl<sub>2</sub>NaO (236.9844):** 236.9849 (M+Na)<sup>+</sup>.

#### 4-Chloro-*N'*-(1-(3,4-dichlorophenyl)but-3-en-1-ylidene)benzenesulfonohydrazide (**C**)

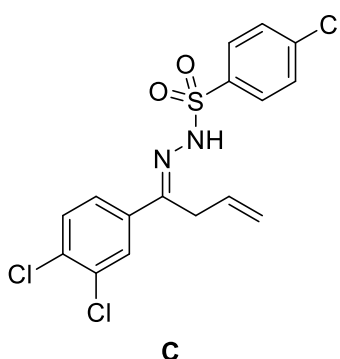

Hydrazone **C** was prepared via **GP3**, using ketone **A** (192 mg, 893 μmol), hydrazide **B** (273 g, 1.35 mmol) and the reaction was stirred for 1.5 h. After removal of solvents, the crude product was purified via column chromatography (hexane:ethyl acetate = 8:2, R<sub>f</sub> = 0.25) to give **C** (285 g, 686 μmol, 77%) as a colorless solid.

**<sup>1</sup>H-NMR (400 MHz, C<sub>6</sub>D<sub>6</sub>):** δ / ppm = 7.95 (s, 1H), 7.81 – 7.73 (m, 2H), 7.51 (d, *J* = 2.1 Hz, 1H), 7.05 (dd, *J* = 8.5, 2.1 Hz, 1H), 6.93 (d, *J* = 8.5 Hz, 1H), 6.88 – 6.81 (m, 2H), 5.11 (ddt, *J* = 17.4, 10.2, 5.1 Hz, 1H), 4.60 (dq, *J* = 10.3, 1.6 Hz, 1H), 4.41 (dq, *J* = 17.4, 1.4 Hz, 1H), 2.49 (dt, *J* = 5.3, 2.0 Hz, 2H).

**<sup>13</sup>C-NMR (101 MHz, C<sub>6</sub>D<sub>6</sub>):** δ / ppm = 150.6, 139.9, 137.5, 136.9, 134.1, 133.2, 130.7, 129.8, 129.5, 129.4, 128.4, 125.7, 117.3, 31.0.

**IR (Diamond-ATR, neat):**  $\tilde{\nu}$  / cm<sup>-1</sup> = 3218, 3091, 2925, 1684, 1585, 1476, 1396, 1168, 1087, 1014, 825, 755.

**MS (ESI):** m/z (%) = 427 (100), 425 (98), 405 (57), 403 (56), 229 (25), 227 (36), 177 (50), 172 (20).

**HRMS (ESI) for C<sub>16</sub>H<sub>13</sub>Cl<sub>3</sub>N<sub>2</sub>NaO<sub>2</sub>S (424.9656): 424.9653 (M+Na)<sup>+</sup>.**

**M.p. (°C): 148–151.**

**1-((4-chlorophenyl)sulfonyl)-3-(3,4-dichlorophenyl)-5-methyl-4,5-dihydro-1H-pyrazole (9g)**

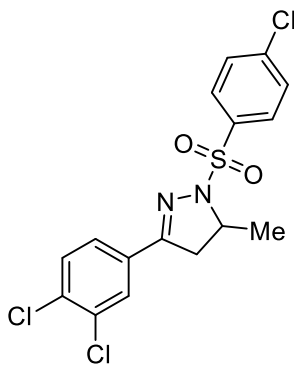

**9g**

Pyrazoline **9g** was prepared via **GP6**, using hydrazone **C** (41.0 mg, 102 μmol), Mn(dpm)<sub>3</sub> (18 mg, 30 μmol), and *t*BuOOH (40 μL, 0.20 mmol), and the reaction was stirred for 11.5 h. After work-up, the crude product was purified via column chromatography (hexane:ethyl acetate = 8:2, R<sub>f</sub> = 0.25) to give **9g** (22.0 mg, 545 μmol, 53%) as a light yellow solid.

**<sup>1</sup>H-NMR (400 MHz, CDCl<sub>3</sub>):** δ / ppm = 7.89 – 7.81 (m, 2H), 7.70 (dd, *J* = 1.9, 0.5 Hz, 1H), 7.52 – 7.42 (m, 4H), 3.97 (ddq, *J* = 10.6, 9.6, 6.2 Hz, 1H), 3.21 (dd, *J* = 17.0, 10.6 Hz, 1H), 2.76 (dd, *J* = 17.0, 9.7 Hz, 1H), 1.64 (d, *J* = 6.2 Hz, 3H).

**<sup>13</sup>C-NMR (101 MHz, CDCl<sub>3</sub>):** δ / ppm = 155.5, 140.3, 135.0, 134.0, 133.3, 130.9, 130.8, 130.1, 129.4, 128.7, 125.9, 58.8, 41.5, 21.9.

**IR (Diamond-ATR, neat):**  $\tilde{\nu}$  / cm<sup>-1</sup> = 3093, 2926, 2854, 1584, 1476, 1396, 1361, 1171, 1088, 1029, 759, 628.

**MS (ESI):** *m/z* (%) = 427 (100), 425 (99), 405 (74), 403 (73), 228 (47), 177 (82), 173 (30).

**HRMS (ESI) for C<sub>16</sub>H<sub>13</sub>Cl<sub>3</sub>N<sub>2</sub>NaO<sub>2</sub>S (424.9656): 424.9652 (M+Na)<sup>+</sup>.**

**M.p. (°C): 186–188.**

**5-((*tert*-Butylperoxy)methyl)-3-phenyl-1-tosyl-4,5-dihydro-1*H*-pyrazole (9h)**

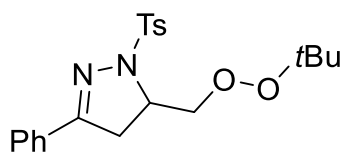

**9h**

Pyrazoline **9h** was prepared via **GP6**, using hydrazone **1a** (32 mg, 0.10 mmol), Mn(dpm)<sub>3</sub> (6.0 mg, 10 μmol), and *t*BuOOH (5.5 M in decane, 40 μL, 0.20 mmol), in dichloroethane (1 mL), and the reaction was stirred for 2.5 h. After work-up, the crude product was purified via column chromatography (hexane:ethyl acetate = 9:1, R<sub>f</sub> = 0.25) to give **9h** (35 mg, 87 μmol, 87%) as a colorless oil.

**<sup>1</sup>H-NMR (400 MHz, CDCl<sub>3</sub>):** δ / ppm = 7.84 – 7.76 (m, 2H), 7.72 – 7.62 (m, 2H), 7.46 – 7.33 (m, 3H), 7.30 – 7.26 (m, 2H), 4.67 (dd, *J* = 11.5, 3.3 Hz, 1H), 4.22 – 4.03 (m, 2H), 3.18 (dd, *J* = 9.6, 1.6 Hz, 2H), 2.38 (s, 3H), 1.26 (s, 9H).

**<sup>13</sup>C-NMR (101 MHz, CDCl<sub>3</sub>):** δ / ppm = 158.6, 144.4, 132.1, 130.9, 130.8, 129.7, 128.8, 128.7, 127.1, 81.1, 77.3, 60.1, 38.4, 26.4, 21.7.

**IR (Diamond-ATR, neat):**  $\tilde{\nu}$  / cm<sup>-1</sup> = 2978, 2927, 2872, 1571, 1449, 1361, 1169, 1093, 1009, 692, 663, 595.

**MS (ESI):** *m/z* (%) = 425 (21), 403 (18), 371 (20), 348 (29), 347 (100), 167 (18).

**HRMS (ESI) for C<sub>21</sub>H<sub>26</sub>N<sub>2</sub>NaO<sub>4</sub>S (425.1505):** 425.1500 (M+Na)<sup>+</sup>.

### 5-Methyl-3-phenyl-1H-pyrazole (**14**)

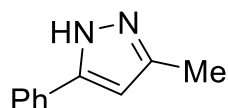

**14**

Pyrazoline **14** (66 mg, 0.20 mmol) was dissolved in TBAF (1 M in THF, 1.2 mL, 1.2 mmol) and the reaction stirred at 80 °C for 12 h. The reaction mixture was diluted with water (10 mL) and extracted with ethyl acetate (3 x 30 mL). The organic phase was then dried over Na<sub>2</sub>SO<sub>4</sub>, filtered, and concentrated in vacuo. The crude product was purified by flash column chromatography on silica gel (hexane:ethyl acetate = 1:1–3:7, R<sub>f</sub> = 0.25) to give **14** (26.0 mg, 149 μmol, 75%) as a colorless solid.

**<sup>1</sup>H-NMR (400 MHz, Acetone-d<sub>6</sub>):** δ / ppm = 12.54 (s, 1H), 8.31 – 8.23 (m, 2H), 7.90 – 7.80 (m, 2H), 7.79 – 7.69 (m, 1H), 7.05 (d, *J* = 0.6 Hz, 1H), 5.13 (s, 2H), 4.76 (s, 1H).

**<sup>13</sup>C-NMR (101 MHz, Acetone-d<sub>6</sub>):** δ / ppm = 129.5, 128.2, 126.1, 101.1, 57.2. (Quaternary carbon signals not visible due to C-N quadrupole interaction). See attached HMBC spectrum and XRay structure.)

**IR (Diamond-ATR, neat):**  $\tilde{\nu}$  / cm<sup>-1</sup> = 3132, 3105, 2924, 2876, 1632, 1464, 1437, 1335, 1224, 1001, 693, 763.

**MS (ESI):** *m/z* (%) = 175 (69), 172 (58), 168 (17), 158 (11), 157 (100).

**HRMS (ESI) for C<sub>10</sub>H<sub>11</sub>N<sub>2</sub>O (175.0866):** 175.0865 (M+H)<sup>+</sup>.

**M.p. (°C):** 143–145.



**(1-Benzyl-3-phenyl-4,5-dihydro-1H-pyrazol-5-yl)methanol (15)**

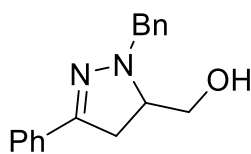

**15**

Pyrazoline **2p** (36 mg, 0.10 mmol) and  $K_2CO_3$  (42 mg, 0.30 mmol) were dissolved in DMF (1.5 mL). Thiophenol (14  $\mu$ L, 0.14 mmol) was added and the reaction stirred at 25 °C for 1 h. After cooling to 0 °C, benzyl bromide (24  $\mu$ L, 0.20 mmol) was added and stirring continued for additional 2 h. The reaction mixture was diluted with a 10% aq. LiCl solution (10 mL) and extracted with diethyl ether (4 x 25 mL). The organic phase was then dried over  $Na_2SO_4$ , filtered, and concentrated in vacuo. The crude product was purified by flash column chromatography on silica gel (hexane:ethyl acetate = 6:4 + 1% trimethylamine,  $R_f$  = 0.35) to give **15** (15 mg, 56  $\mu$ mol, 56%) as a colorless oil.

**$^1H$ -NMR (400 MHz,  $CDCl_3$ ):**  $\delta$  / ppm = 7.67 – 7.61 (m, 2H), 7.42 – 7.27 (m, 8H), 4.49 – 4.30 (m, 2H), 3.63 – 3.44 (m, 3H), 3.15 – 3.08 (m, 2H).

**$^{13}C$ -NMR (101 MHz,  $CDCl_3$ ):**  $\delta$  / ppm = 151.1, 137.2, 132.9, 129.5, 128.9, 128.64, 128.60, 127.7, 126.1, 66.3, 61.2, 58.7, 35.8.

**IR (Diamond-ATR, neat):**  $\tilde{\nu}$  /  $cm^{-1}$  = 3379, 3084, 3060, 3058, 2924, 2852, 1560, 1453, 1447, 1361, 1203, 1039, 859, 692.

**MS (ESI):**  $m/z$  (%) = 267 (100), 239 (4), 177 (18).

**HRMS (ESI) for  $C_{17}H_{19}N_2O$  (267.1492):** 267.1496 (M+H)<sup>+</sup>.

**(3-Phenyl-4,5-dihydro-1H-pyrazol-5-yl)methanol hydrochloride (16)**

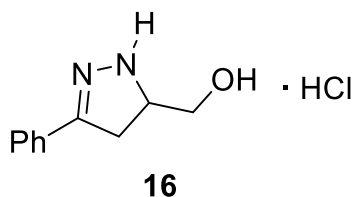

Pyrazoline **2p** (26 mg, 72  $\mu$ mol) and  $K_2CO_3$  (30 mg, 0.22 mmol) were dissolved in DMF (1.1 mL). Thiophenol (10  $\mu$ L, 0.10 mmol) was added and the reaction stirred at 25  $^{\circ}C$  for 1 h. The reaction mixture was diluted with a 10% aq. LiCl solution (10 mL) and extracted with diethyl ether (4 x 25 mL). The organic phase was then dried over  $Na_2SO_4$ , filtered, and concentrated in vacuo. The crude was dissolved in  $Et_2O$  (0.4 mL) and added dropwise to a solution of HCl in  $Et_2O$  (0.33 M, 0.65 mL, 0.22 mmol) and **16** (7.0 mg, 33  $\mu$ mol, 46%) precipitated as a light yellow solid which was obtained via filtration.

NMR yield: Pyrazoline **2p** (36 mg, 0.10 mmol) and  $K_2CO_3$  (42 mg, 0.30 mmol) was dissolved in DMF (1.5 mL). Thiophenol (15  $\mu$ L, 0.15 mmol) was added and the reaction stirred at 25  $^{\circ}C$  for 1 h. The reaction mixture was diluted with water (10 mL) and extracted with diethyl ether (5 x 25 mL). The organic phase was then dried over  $Na_2SO_4$ , filtered, and concentrated in vacuo. The crude was dissolved in  $Et_2O$  (1 mL) and HCl (2 M in  $Et_2O$ , 60  $\mu$ L, 1.2 mmol) was added. The solvent was removed in vacuo, trimethoxybenzene added as standard, the mixture dissolved in  $DMSO-d_6$ , and the yield of **16** (55  $\mu$ mol, 55%) determined via NMR.

**$^1H$ -NMR (500 MHz,  $DMSO-d_6$ ):**  $\delta$  / ppm = 7.86 – 7.83 (m, 2H), 7.61 (ddt,  $J$  = 8.2, 6.7, 1.3 Hz, 1H), 7.56 – 7.52 (m, 2H), 4.17 (dtd,  $J$  = 10.1, 6.2, 4.0 Hz, 1H), 3.72 (dd,  $J$  = 11.9, 4.0 Hz, 1H), 3.64 (dd,  $J$  = 11.9, 6.0 Hz, 1H), 3.58 (dd,  $J$  = 17.9, 9.8 Hz, 1H), 3.34 (dd,  $J$  = 17.9, 6.4 Hz, 1H).

**$^{13}C$ -NMR (126 MHz,  $DMSO-d_6$ ):**  $\delta$  / ppm = 132.4, 129.1, 129.03, 128.99, 128.1, 60.1, 59.1, 37.1.

**IR (Diamond-ATR, neat):**  $\tilde{\nu}$  /  $cm^{-1}$  = 3301, 3057, 2868, 2837, 2754, 2585, 1653, 1560, 1577, 1591, 1356, 1096, 922, 853, 762, 688.

**MS (ESI):**  $m/z$  (%) = 177 (100), 159 (14), 159 (58), 141 (11).

**HRMS (ESI) for  $C_{10}H_{13}N_2O$  (177.1022):** 177.1022 (M+H) $^+$ .

**M.p. ( $^{\circ}C$ ):** 97–99.

**(6-Phenyl-2,3,4,5-tetrahydropyridazin-3-yl)methanol (17)**

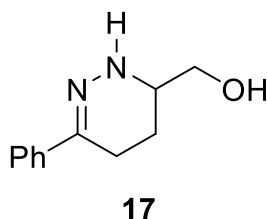

Pyrazoline **2v** (37.5 mg, 99.9  $\mu\text{mol}$ ) and  $\text{K}_2\text{CO}_3$  (42 mg, 0.30 mmol) were dissolved in DMF (1.0 mL). Thiophenol (30  $\mu\text{L}$ , 0.30 mmol) was added and the reaction stirred at 25  $^\circ\text{C}$  for 1 h. After cooling to 0  $^\circ\text{C}$ , benzyl bromide (24  $\mu\text{L}$ , 0.20 mmol) was added and stirring continued for additional 2 h. The reaction mixture was diluted with ethyl acetate (20 mL) and washed with 10% aq. LiCl solution (2 x 10 mL) and brine (15 mL). The organic phase was then dried over  $\text{MgSO}_4$ , filtered, and concentrated in vacuo. The crude product was purified by flash column chromatography on silica gel (DCM:ethyl acetate=3:7,  $R_f$  = 0.3) to give **17** (12.3 mg, 64.7  $\mu\text{mol}$ , 65%) as a colorless oil.

**$^1\text{H-NMR}$  (400 MHz,  $\text{C}_6\text{D}_6$ ):**  $\delta$  / ppm = 7.83 – 7.78 (m, 2H), 7.27 – 7.20 (m, 2H), 7.16 – 7.10 (m, 1H), 3.19 (d,  $J$  = 5.8 Hz, 2H), 2.75 (p,  $J$  = 6.2 Hz, 1H), 2.18 – 2.05 (m, 2H), 1.44 – 1.34 (m, 2H).

**$^{13}\text{C-NMR}$  (101 MHz,  $\text{C}_6\text{D}_6$ ):**  $\delta$  / ppm = 142.5, 139.4, 128.4, 124.9, 64.8, 52.6, 22.1, 22.0.

**IR (Diamond-ATR, neat):**  $\tilde{\nu}$  /  $\text{cm}^{-1}$  = 3350, 2932, 1682, 1594, 1447, 1347, 1141, 1056, 1024, 756, 694.

**MS (ESI):**  $m/z$  (%) = 349 (49), 335 (88), 223 (30), 203 (40), 191 (100), 187 (29), 177 (40).

**HRMS (ESI) for  $\text{C}_{11}\text{H}_{15}\text{N}_2\text{O}$  (191.1179):** 191.1180 ( $\text{M}+\text{H}$ ) $^+$ .

## Single Crystal X-Ray Data

Single crystals of compound **6c** were obtained by slow evaporation of benzene-d<sub>6</sub> solution. Single crystals of compound **8a** and **8b** were obtained by slow evaporation of ethanol solutions. Single crystals of compound **9d** were obtained by slow evaporation of chloroform solution. **14** was dissolved in ethyl acetate in a small vial which was placed in a larger vial containing hexane which was then closed and left standing for several days to obtain single crystals.

CCDC 2078368 (**6c**), CCDC 2078369 (**8a**), CCDC 2078370 (**8b**), CCDC 2078371 (**9d**), and CCDC 2078372 (**14**) contain the supplementary crystallographic data for this paper. These data are provided free of charge by The Cambridge Crystallographic Data Centre via [www.ccdc.cam.ac.uk/data\\_request/cif](http://www.ccdc.cam.ac.uk/data_request/cif).

### Crystal Structure Data of 6c (CCDC 2078368).

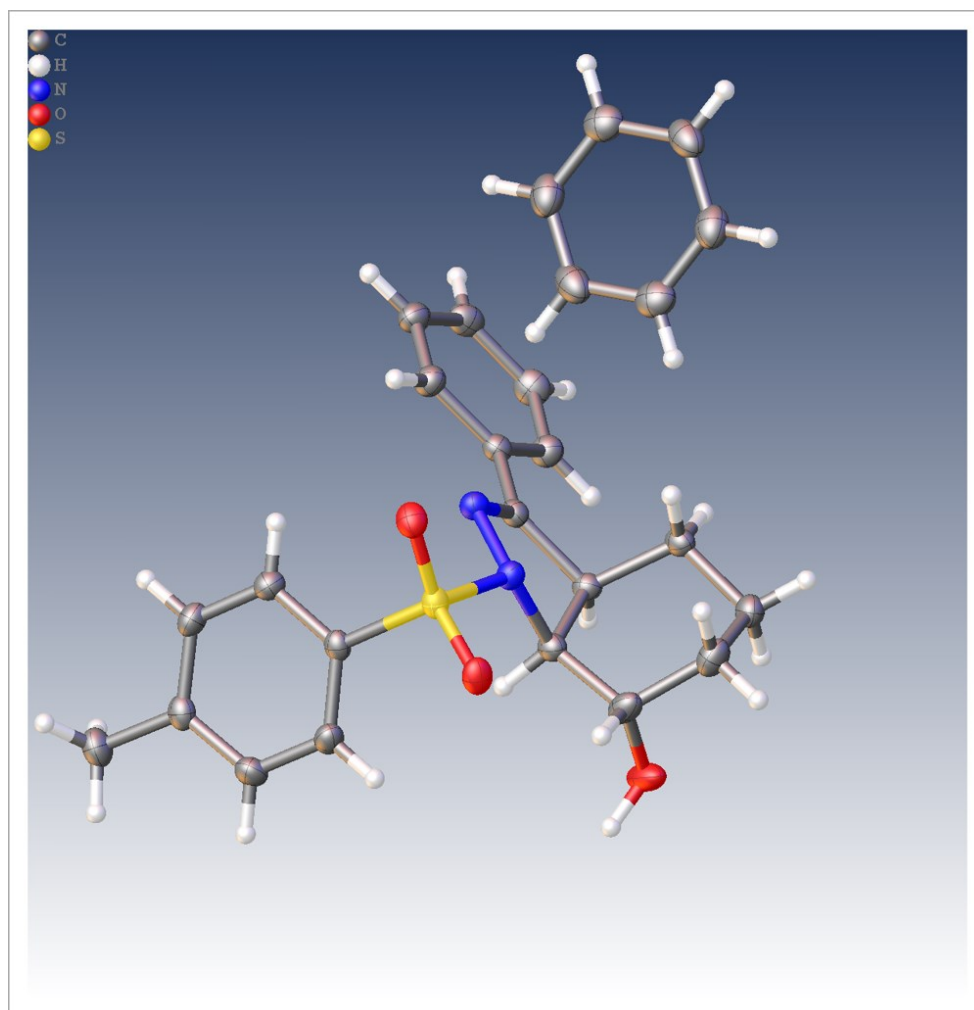

Table T4 Crystal data and structure refinement for **6c** (CCDC 2078368).

|                     |                                                                 |
|---------------------|-----------------------------------------------------------------|
| Identification code | ca061220_1_1                                                    |
| Empirical formula   | C <sub>23</sub> H <sub>25</sub> N <sub>2</sub> O <sub>3</sub> S |
| Formula weight      | 409.51                                                          |
| Temperature/K       | 100.0(1)                                                        |
| Crystal system      | monoclinic                                                      |
| Space group         | P2 <sub>1</sub> /c                                              |
| a/Å                 | 9.68420(10)                                                     |
| b/Å                 | 25.2973(2)                                                      |

|                                             |                                                                |
|---------------------------------------------|----------------------------------------------------------------|
| c/Å                                         | 8.78460(10)                                                    |
| $\alpha$ /°                                 | 90                                                             |
| $\beta$ /°                                  | 109.0070(10)                                                   |
| $\gamma$ /°                                 | 90                                                             |
| Volume/Å <sup>3</sup>                       | 2034.75(4)                                                     |
| Z                                           | 4                                                              |
| $\rho_{\text{calc}}$ /cm <sup>3</sup>       | 1.337                                                          |
| $\mu$ /mm <sup>-1</sup>                     | 1.634                                                          |
| F(000)                                      | 868.0                                                          |
| Crystal size/mm <sup>3</sup>                | 0.269 × 0.209 × 0.035                                          |
| Radiation                                   | Cu K $\alpha$ ( $\lambda$ = 1.54184)                           |
| 2 $\Theta$ range for data collection/°      | 6.988 to 159.994                                               |
| Index ranges                                | -12 ≤ h ≤ 12, -32 ≤ k ≤ 32, -11 ≤ l ≤ 10                       |
| Reflections collected                       | 50821                                                          |
| Independent reflections                     | 4378 [ $R_{\text{int}}$ = 0.0526, $R_{\text{sigma}}$ = 0.0228] |
| Data/restraints/parameters                  | 4378/1/266                                                     |
| Goodness-of-fit on F <sup>2</sup>           | 1.089                                                          |
| Final R indexes [ $ I  \geq 2\sigma(I)$ ]   | $R_1$ = 0.0367, $wR_2$ = 0.0928                                |
| Final R indexes [all data]                  | $R_1$ = 0.0403, $wR_2$ = 0.0948                                |
| Largest diff. peak/hole / e Å <sup>-3</sup> | 0.29/-0.47                                                     |

## Crystal Structure Data of 8a (CCDC 2078369)

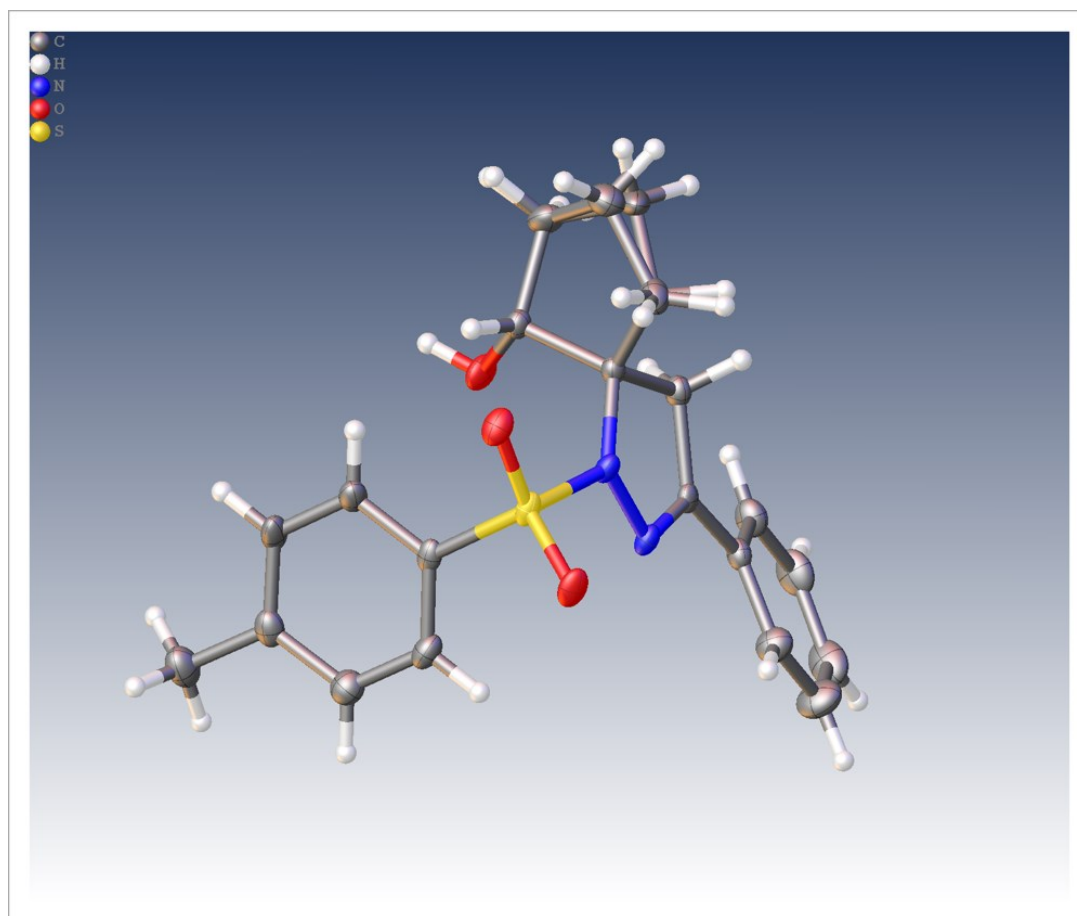

Table T5 Crystal data and structure refinement for **8a** (CCDC 2078369).

|                     |                                                                 |
|---------------------|-----------------------------------------------------------------|
| Identification code | ca050221_1_1                                                    |
| Empirical formula   | C <sub>20</sub> H <sub>22</sub> N <sub>2</sub> O <sub>3</sub> S |
| Formula weight      | 370.45                                                          |
| Temperature/K       | 100.0(1)                                                        |
| Crystal system      | monoclinic                                                      |
| Space group         | P2 <sub>1</sub> /c                                              |
| a/Å                 | 6.5364(7)                                                       |
| b/Å                 | 10.9885(16)                                                     |
| c/Å                 | 25.521(4)                                                       |
| α/°                 | 90                                                              |

|                                                |                                                                  |
|------------------------------------------------|------------------------------------------------------------------|
| $\beta/^\circ$                                 | 95.158(4)                                                        |
| $\gamma/^\circ$                                | 90                                                               |
| Volume/ $\text{\AA}^3$                         | 1825.6(4)                                                        |
| Z                                              | 4                                                                |
| $\rho_{\text{calc}}/\text{cm}^3$               | 1.348                                                            |
| $\mu/\text{mm}^{-1}$                           | 0.200                                                            |
| F(000)                                         | 784.0                                                            |
| Crystal size/ $\text{mm}^3$                    | 0.26 × 0.1 × 0.08                                                |
| Radiation                                      | MoK $\alpha$ ( $\lambda = 0.71073$ )                             |
| 2 $\Theta$ range for data collection/ $^\circ$ | 4.038 to 56.656                                                  |
| Index ranges                                   | -8 ≤ h ≤ 8, -14 ≤ k ≤ 14, -33 ≤ l ≤ 31                           |
| Reflections collected                          | 16584                                                            |
| Independent reflections                        | 4525 [ $R_{\text{int}} = 0.0498$ , $R_{\text{sigma}} = 0.0550$ ] |
| Data/restraints/parameters                     | 4525/18/249                                                      |
| Goodness-of-fit on $F^2$                       | 1.029                                                            |
| Final R indexes [ $ I  \geq 2\sigma(I)$ ]      | $R_1 = 0.0449$ , $wR_2 = 0.0988$                                 |
| Final R indexes [all data]                     | $R_1 = 0.0725$ , $wR_2 = 0.1107$                                 |
| Largest diff. peak/hole / e $\text{\AA}^{-3}$  | 0.33/-0.45                                                       |



## Crystal Structure Data of **8b** (CCDC 2078370)

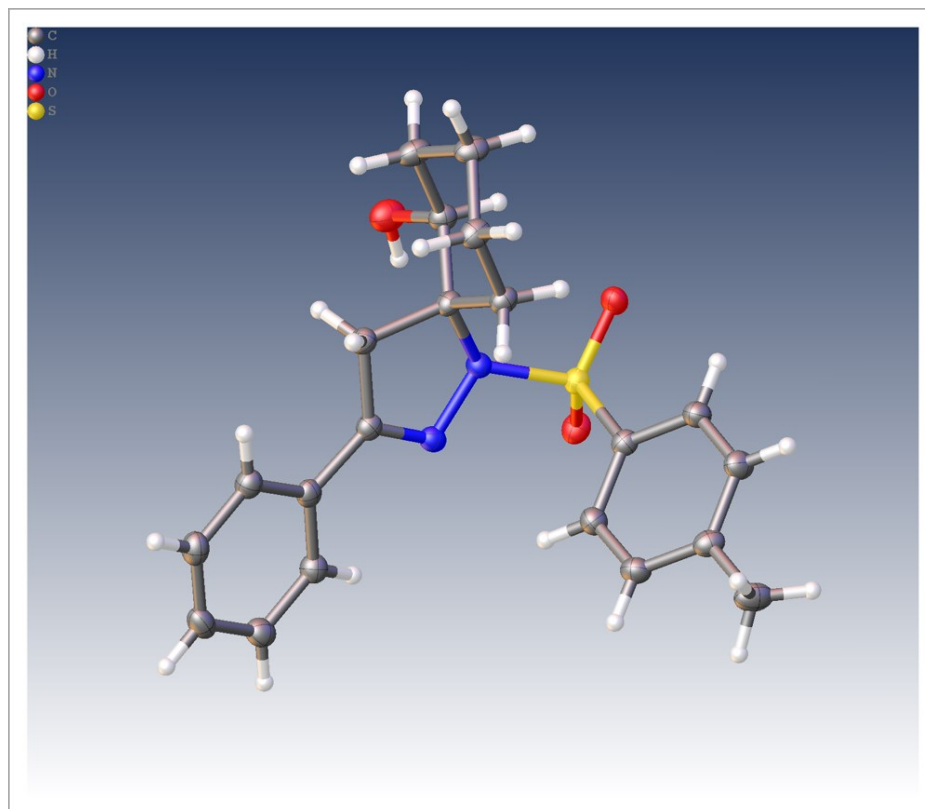

Table T6 Crystal data and structure refinement for **8b** (CCDC 2078370).

|                     |                                                                 |
|---------------------|-----------------------------------------------------------------|
| Identification code | ca110121_1_1                                                    |
| Empirical formula   | C <sub>21</sub> H <sub>24</sub> N <sub>2</sub> O <sub>3</sub> S |
| Formula weight      | 384.48                                                          |
| Temperature/K       | 100.0(1)                                                        |
| Crystal system      | monoclinic                                                      |
| Space group         | P2 <sub>1</sub> /c                                              |
| a/Å                 | 11.2584(2)                                                      |
| b/Å                 | 18.2306(2)                                                      |
| c/Å                 | 10.24990(10)                                                    |
| α/°                 | 90                                                              |
| β/°                 | 116.215(2)                                                      |

|                                               |                                                               |
|-----------------------------------------------|---------------------------------------------------------------|
| $\gamma/^\circ$                               | 90                                                            |
| Volume/ $\text{\AA}^3$                        | 1887.38(5)                                                    |
| Z                                             | 4                                                             |
| $\rho_{\text{calc}}/\text{g}/\text{cm}^3$     | 1.353                                                         |
| $\mu/\text{mm}^{-1}$                          | 1.723                                                         |
| F(000)                                        | 816.0                                                         |
| Crystal size/ $\text{mm}^3$                   | $0.191 \times 0.119 \times 0.056$                             |
| Radiation                                     | Cu K $\alpha$ ( $\lambda = 1.54184$ )                         |
| $2\Theta$ range for data collection/ $^\circ$ | 8.754 to 160.596                                              |
| Index ranges                                  | $-14 \leq h \leq 14, -23 \leq k \leq 23, -11 \leq l \leq 12$  |
| Reflections collected                         | 49272                                                         |
| Independent reflections                       | 4082 [ $R_{\text{int}} = 0.0677, R_{\text{sigma}} = 0.0244$ ] |
| Data/restraints/parameters                    | 4082/1/248                                                    |
| Goodness-of-fit on $F^2$                      | 1.074                                                         |
| Final R indexes [ $ I  \geq 2\sigma(I)$ ]     | $R_1 = 0.0455, wR_2 = 0.1267$                                 |
| Final R indexes [all data]                    | $R_1 = 0.0478, wR_2 = 0.1285$                                 |
| Largest diff. peak/hole / $e \text{\AA}^{-3}$ | 1.39/-0.49                                                    |

## Crystal Structure Data of 9d (CCDC 2078371)

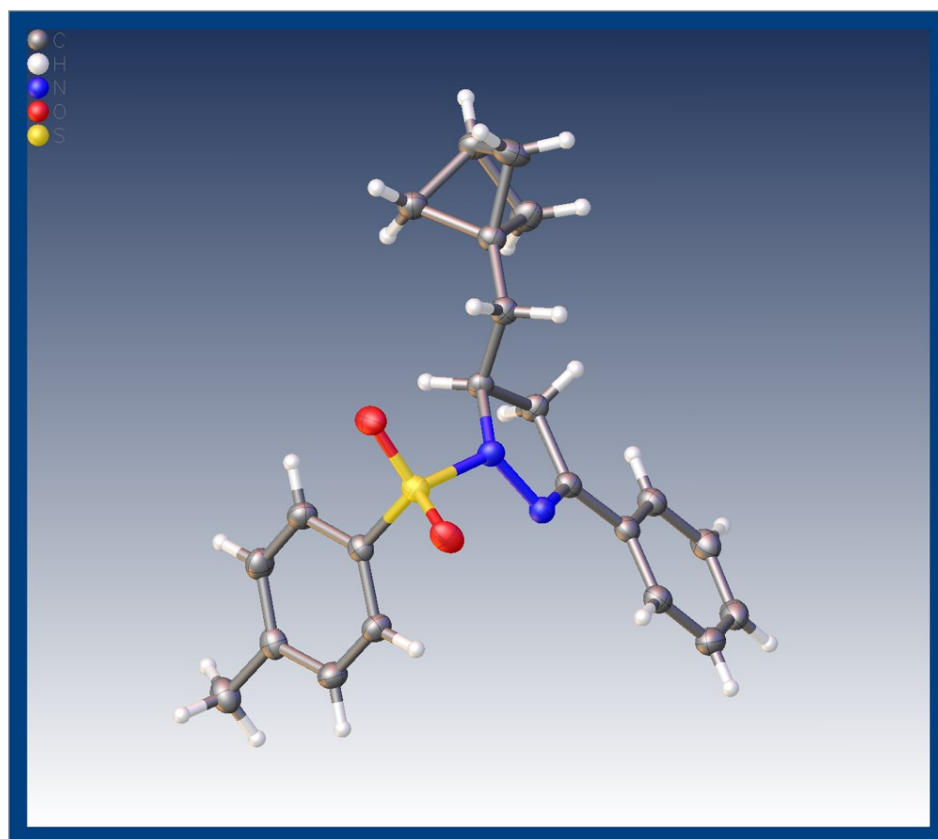

Table T7 Crystal data and structure refinement for **9d** (CCDC 2078371).

|                     |                                                                 |
|---------------------|-----------------------------------------------------------------|
| Identification code | ca150920_1_1                                                    |
| Empirical formula   | C <sub>22</sub> H <sub>24</sub> N <sub>2</sub> O <sub>2</sub> S |
| Formula weight      | 380.49                                                          |
| Temperature/K       | 100.0(1)                                                        |
| Crystal system      | triclinic                                                       |
| Space group         | P-1                                                             |
| a/Å                 | 6.01790(10)                                                     |
| b/Å                 | 8.8113(2)                                                       |
| c/Å                 | 18.0991(2)                                                      |
| α/°                 | 93.6700(10)                                                     |

|                                                |                                                                  |
|------------------------------------------------|------------------------------------------------------------------|
| $\beta/^\circ$                                 | 91.3400(10)                                                      |
| $\gamma/^\circ$                                | 91.3820(10)                                                      |
| Volume/ $\text{\AA}^3$                         | 957.17(3)                                                        |
| Z                                              | 2                                                                |
| $\rho_{\text{calc}}/\text{g}/\text{cm}^3$      | 1.320                                                            |
| $\mu/\text{mm}^{-1}$                           | 1.654                                                            |
| F(000)                                         | 404.0                                                            |
| Crystal size/ $\text{mm}^3$                    | 0.198 × 0.121 × 0.055                                            |
| Radiation                                      | Cu K $\alpha$ ( $\lambda = 1.54184$ )                            |
| 2 $\Theta$ range for data collection/ $^\circ$ | 4.894 to 160.046                                                 |
| Index ranges                                   | -7 ≤ h ≤ 7, -9 ≤ k ≤ 10, -23 ≤ l ≤ 23                            |
| Reflections collected                          | 23188                                                            |
| Independent reflections                        | 4054 [ $R_{\text{int}} = 0.0427$ , $R_{\text{sigma}} = 0.0279$ ] |
| Data/restraints/parameters                     | 4054/0/245                                                       |
| Goodness-of-fit on $F^2$                       | 1.079                                                            |
| Final R indexes [ $ I  \geq 2\sigma(I)$ ]      | $R_1 = 0.0399$ , $wR_2 = 0.0994$                                 |
| Final R indexes [all data]                     | $R_1 = 0.0491$ , $wR_2 = 0.1076$                                 |
| Largest diff. peak/hole / e $\text{\AA}^{-3}$  | 0.43/-0.43                                                       |

## Crystal Structure Data of 14 (CCDC 2078372)

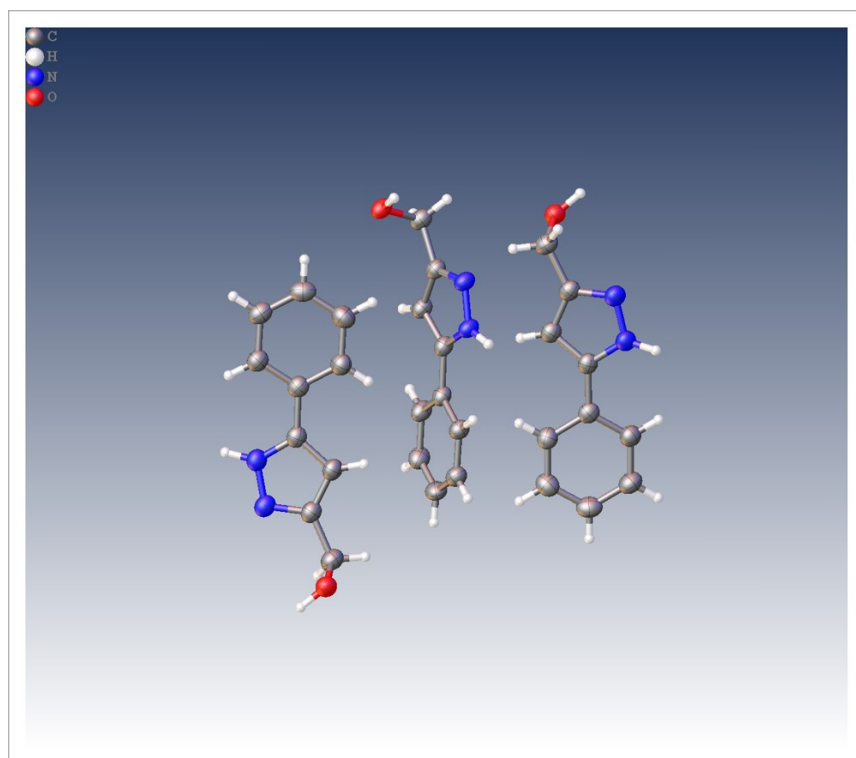

Table T8 Crystal data and structure refinement for **14** (CCDC 2078372).

|                     |                                                  |
|---------------------|--------------------------------------------------|
| Identification code | ca230920_1_1                                     |
| Empirical formula   | C <sub>10</sub> H <sub>10</sub> N <sub>2</sub> O |
| Formula weight      | 174.20                                           |
| Temperature/K       | 100.0(1)                                         |
| Crystal system      | monoclinic                                       |
| Space group         | P2 <sub>1</sub> /c                               |
| a/Å                 | 6.6322(2)                                        |
| b/Å                 | 27.6617(7)                                       |
| c/Å                 | 14.7131(5)                                       |
| α/°                 | 90                                               |
| β/°                 | 92.857(3)                                        |
| γ/°                 | 90                                               |

|                                             |                                                                  |
|---------------------------------------------|------------------------------------------------------------------|
| Volume/Å <sup>3</sup>                       | 2695.88(14)                                                      |
| Z                                           | 12                                                               |
| $\rho_{\text{calc}}/\text{g}/\text{cm}^3$   | 1.288                                                            |
| $\mu/\text{mm}^{-1}$                        | 0.692                                                            |
| F(000)                                      | 1104.0                                                           |
| Crystal size/mm <sup>3</sup>                | 0.194 × 0.094 × 0.022                                            |
| Radiation                                   | Cu K $\alpha$ ( $\lambda = 1.54184$ )                            |
| 2 $\Theta$ range for data collection/°      | 6.39 to 160.184                                                  |
| Index ranges                                | -8 ≤ h ≤ 8, -34 ≤ k ≤ 34, -18 ≤ l ≤ 18                           |
| Reflections collected                       | 42104                                                            |
| Independent reflections                     | 5798 [ $R_{\text{int}} = 0.0957$ , $R_{\text{sigma}} = 0.0441$ ] |
| Data/restraints/parameters                  | 5798/6/370                                                       |
| Goodness-of-fit on F <sup>2</sup>           | 1.075                                                            |
| Final R indexes [ $ I  \geq 2\sigma(I)$ ]   | $R_1 = 0.0557$ , $wR_2 = 0.1511$                                 |
| Final R indexes [all data]                  | $R_1 = 0.0769$ , $wR_2 = 0.1666$                                 |
| Largest diff. peak/hole / e Å <sup>-3</sup> | 0.31/-0.28                                                       |



<sup>1</sup>H NMR and <sup>13</sup>C NMR spectrum of compound **1e**

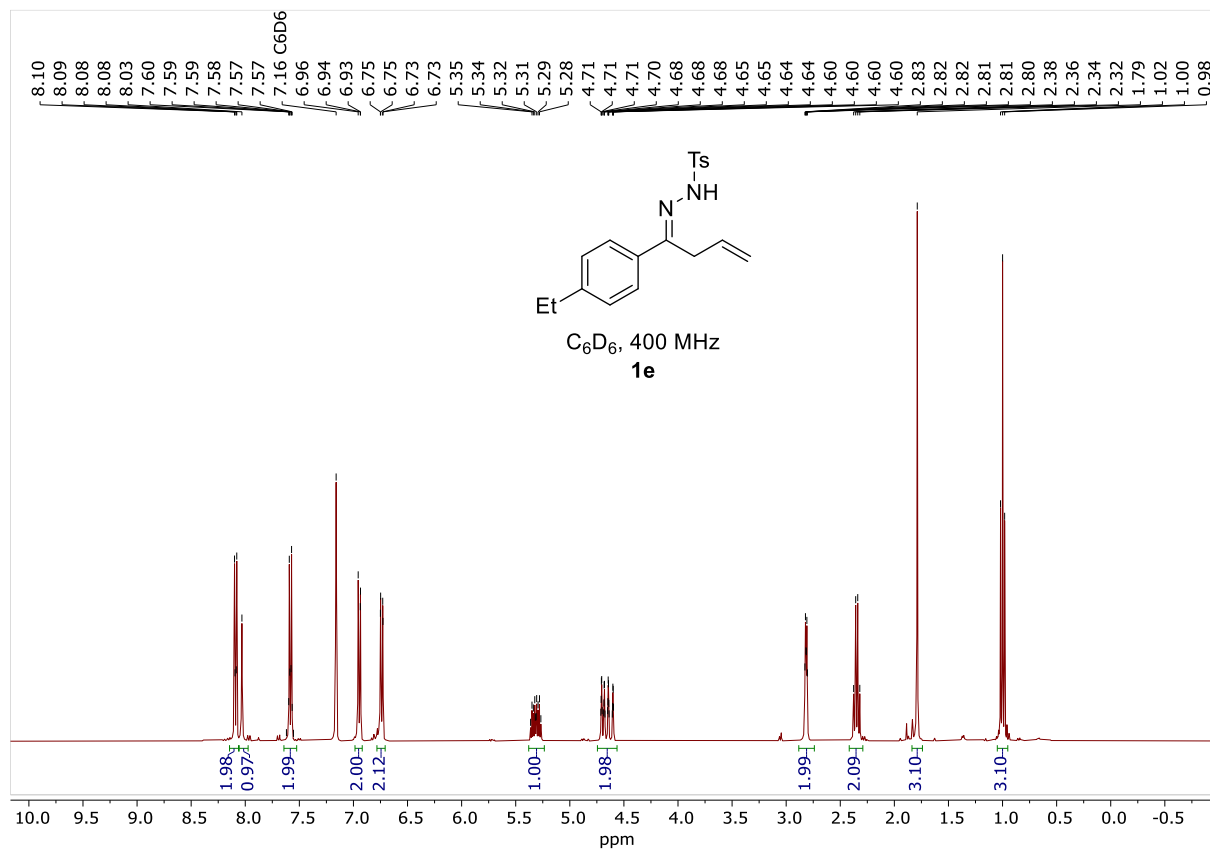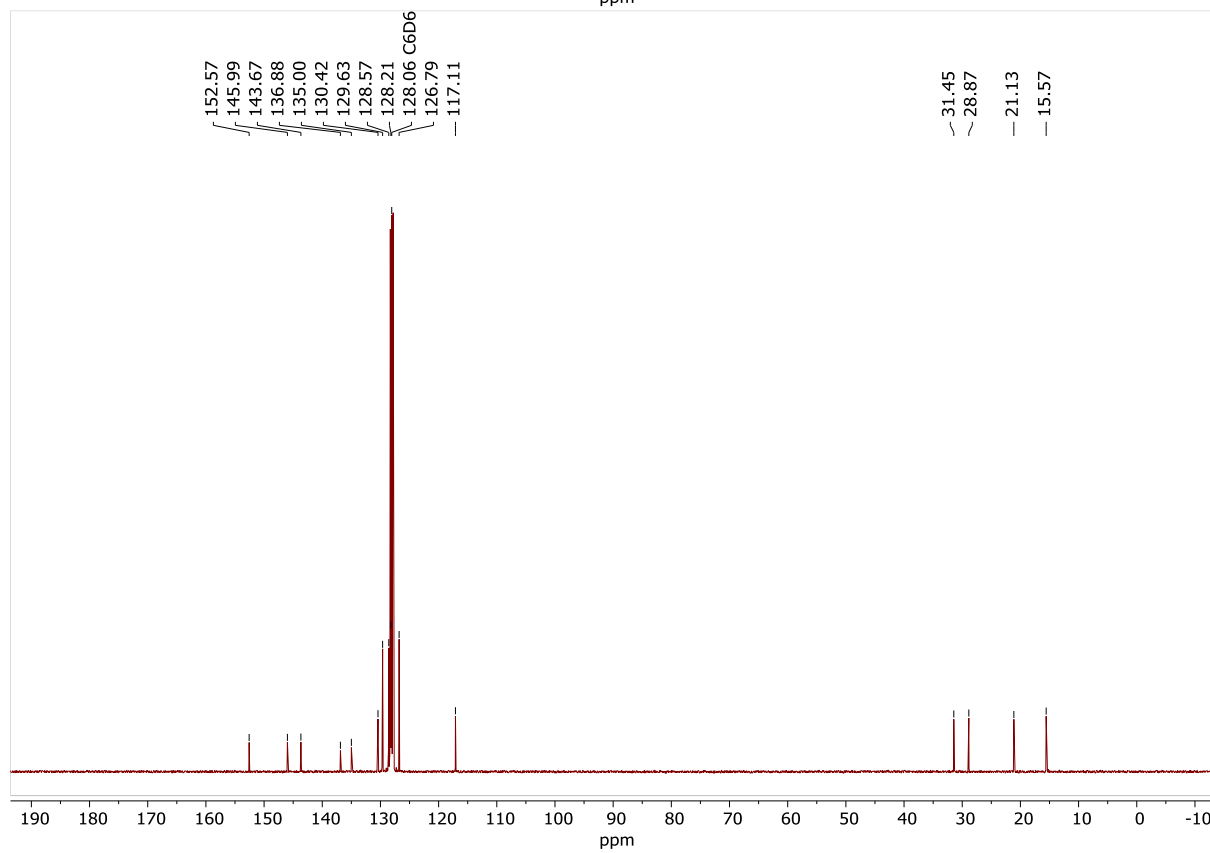



<sup>1</sup>H NMR and <sup>13</sup>C NMR spectrum of compound **1f**

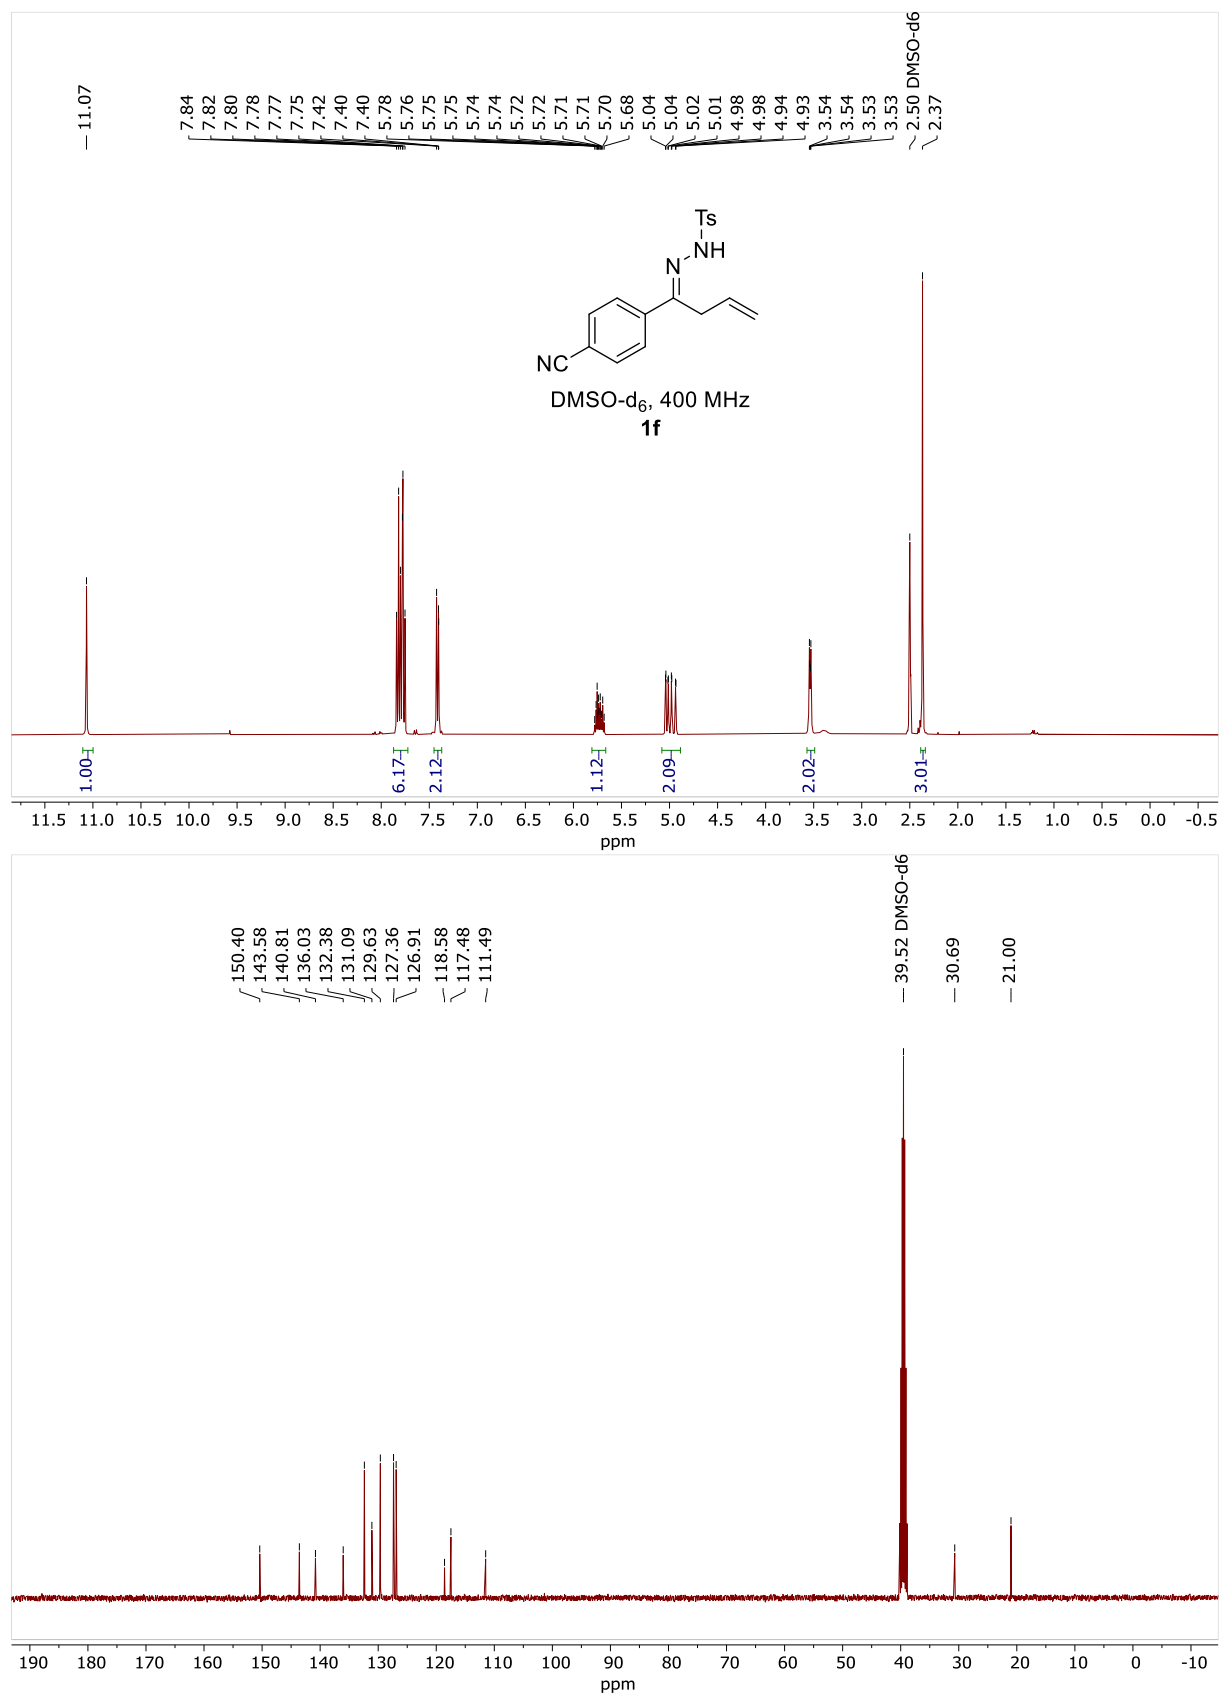

# $^1\text{H}$ NMR and $^{13}\text{C}$ NMR spectrum of compound **1g**

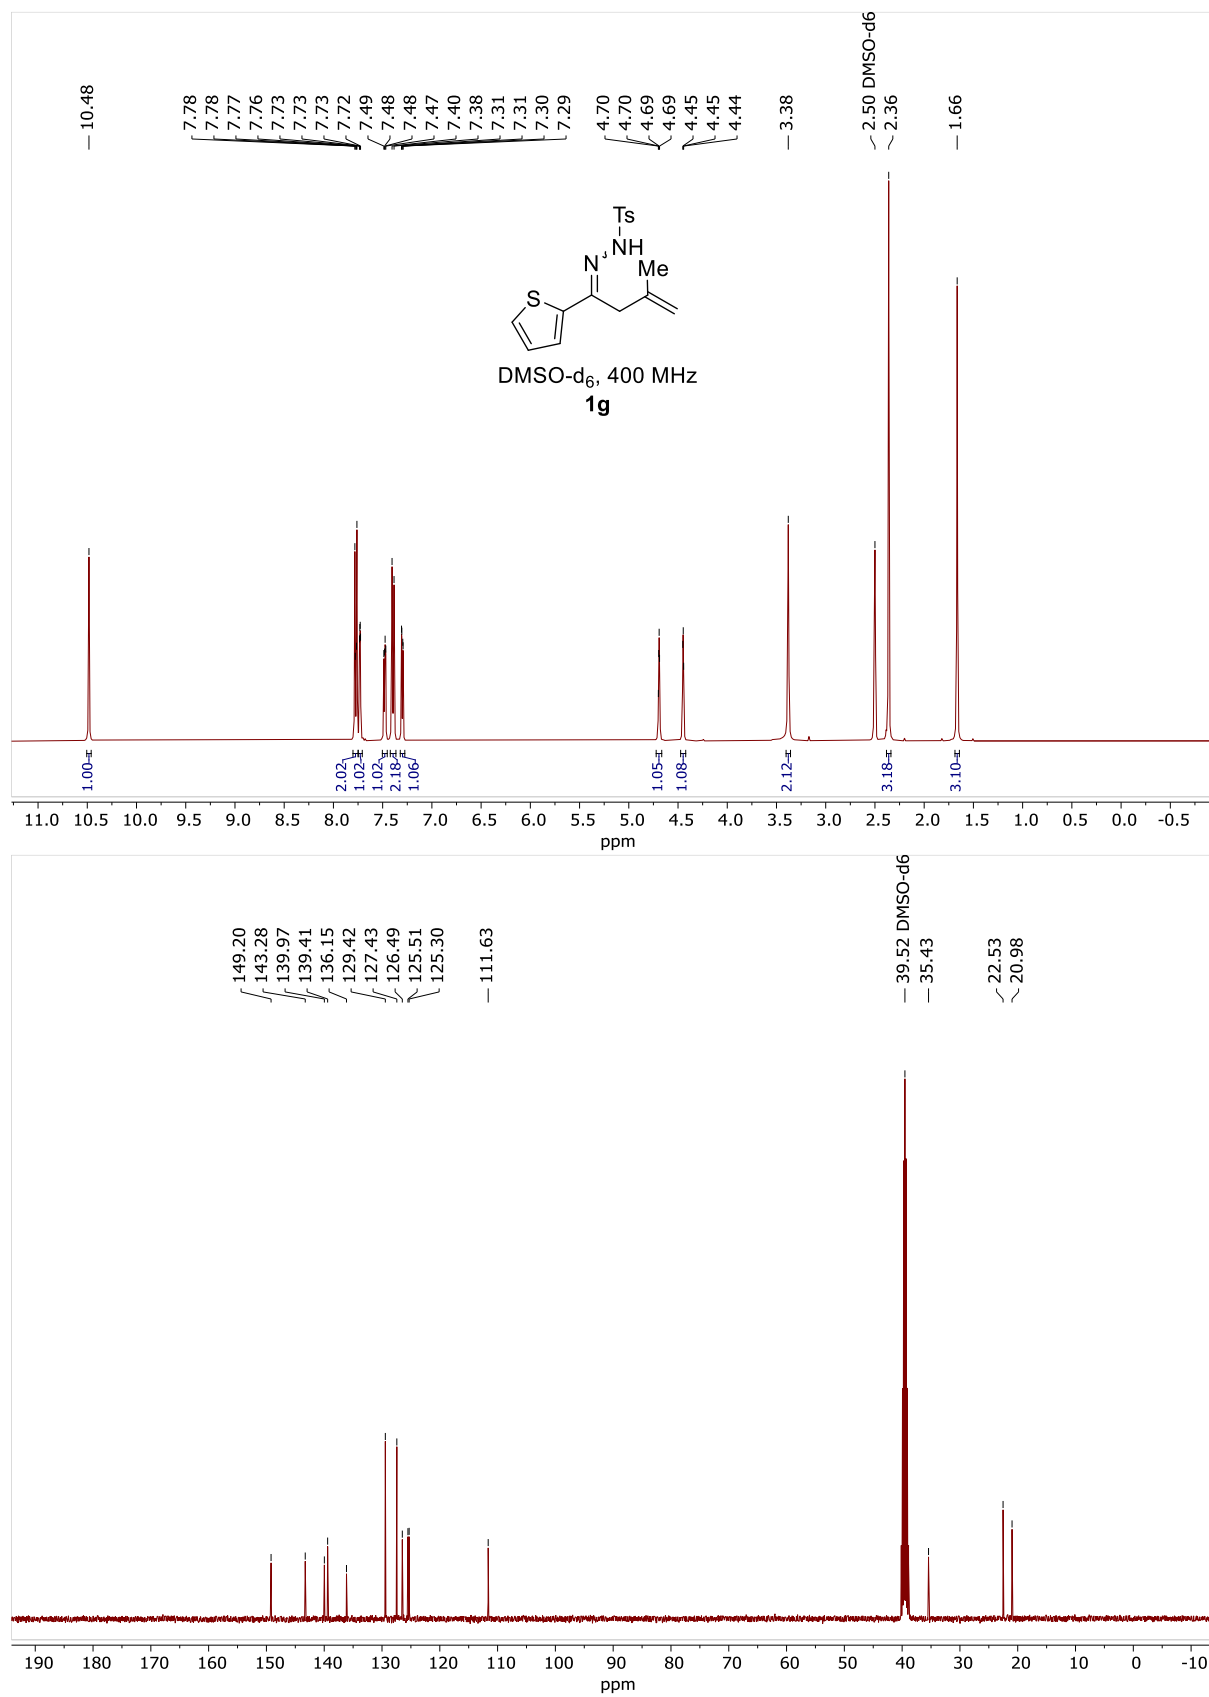

$^1\text{H}$  NMR and  $^{13}\text{C}$  NMR spectrum of compound **1h**

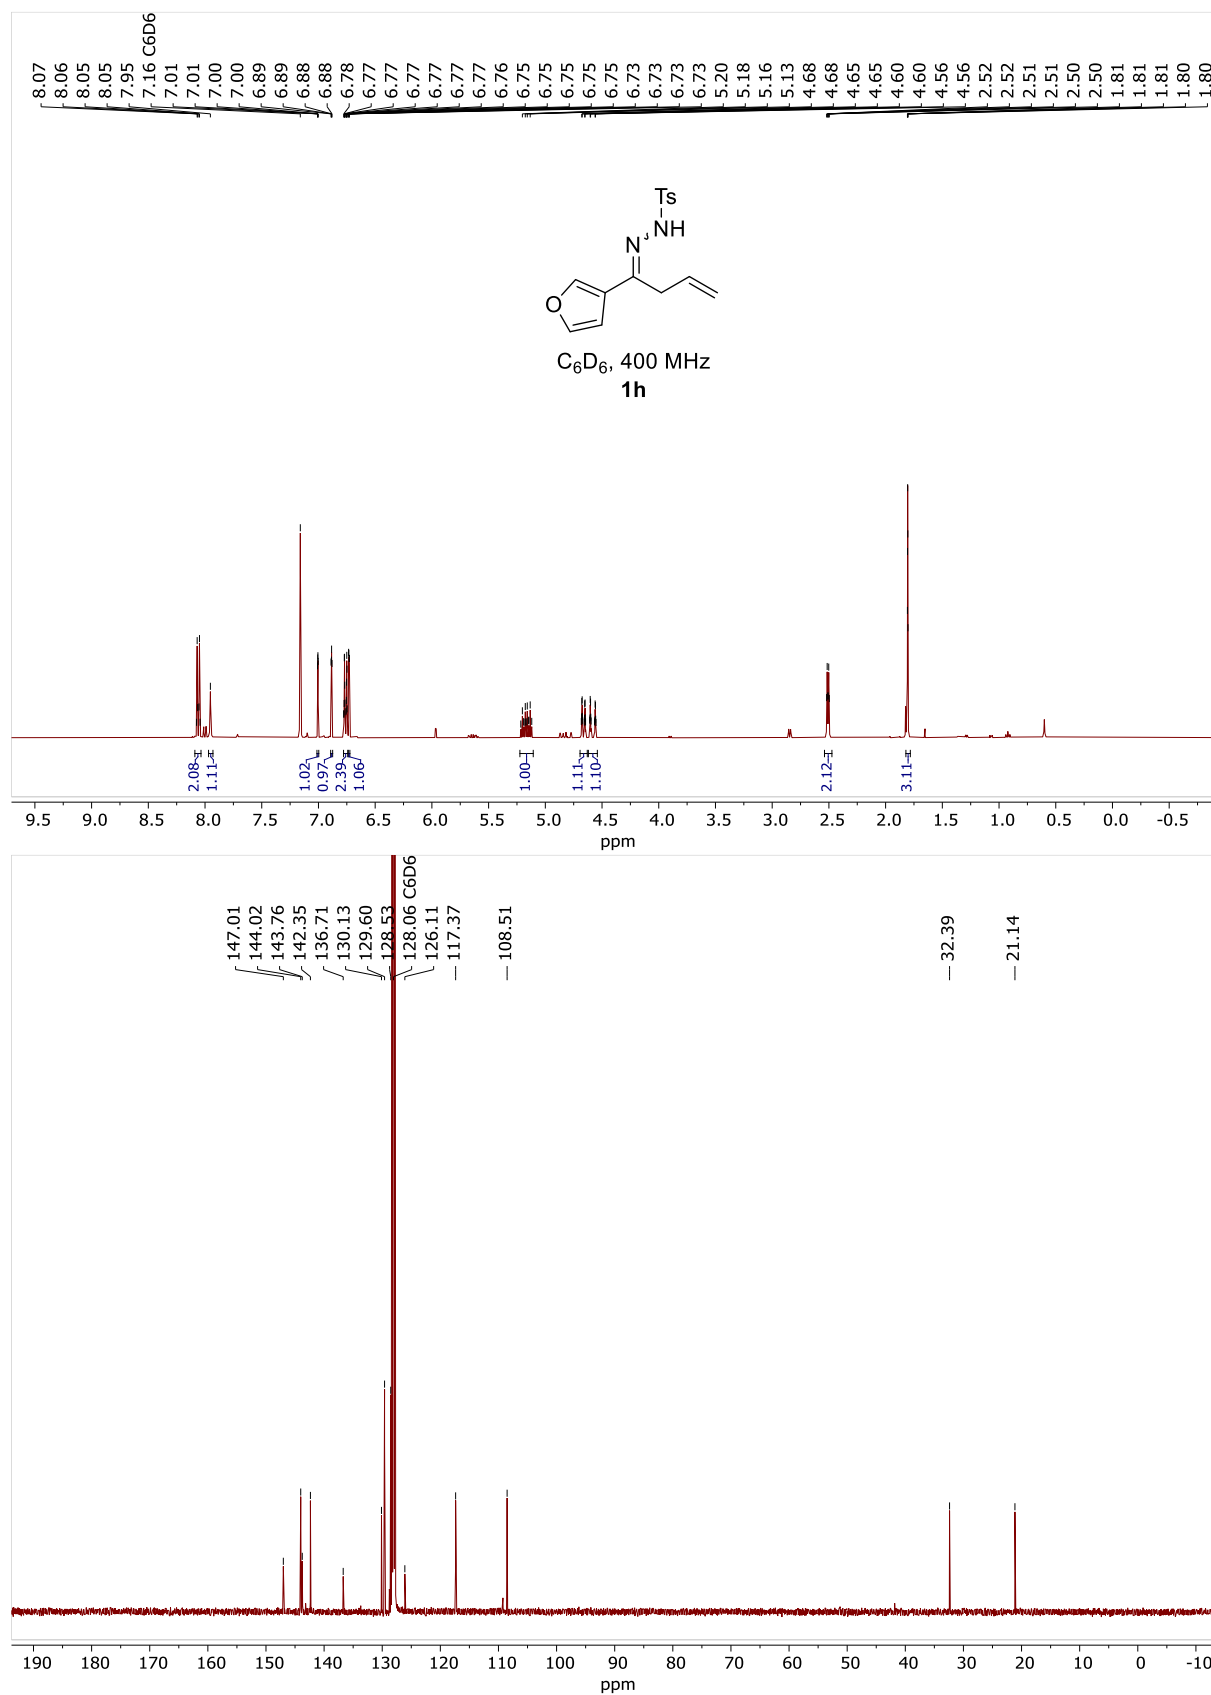

<sup>1</sup>H NMR and <sup>13</sup>C NMR spectrum of compound **1i**

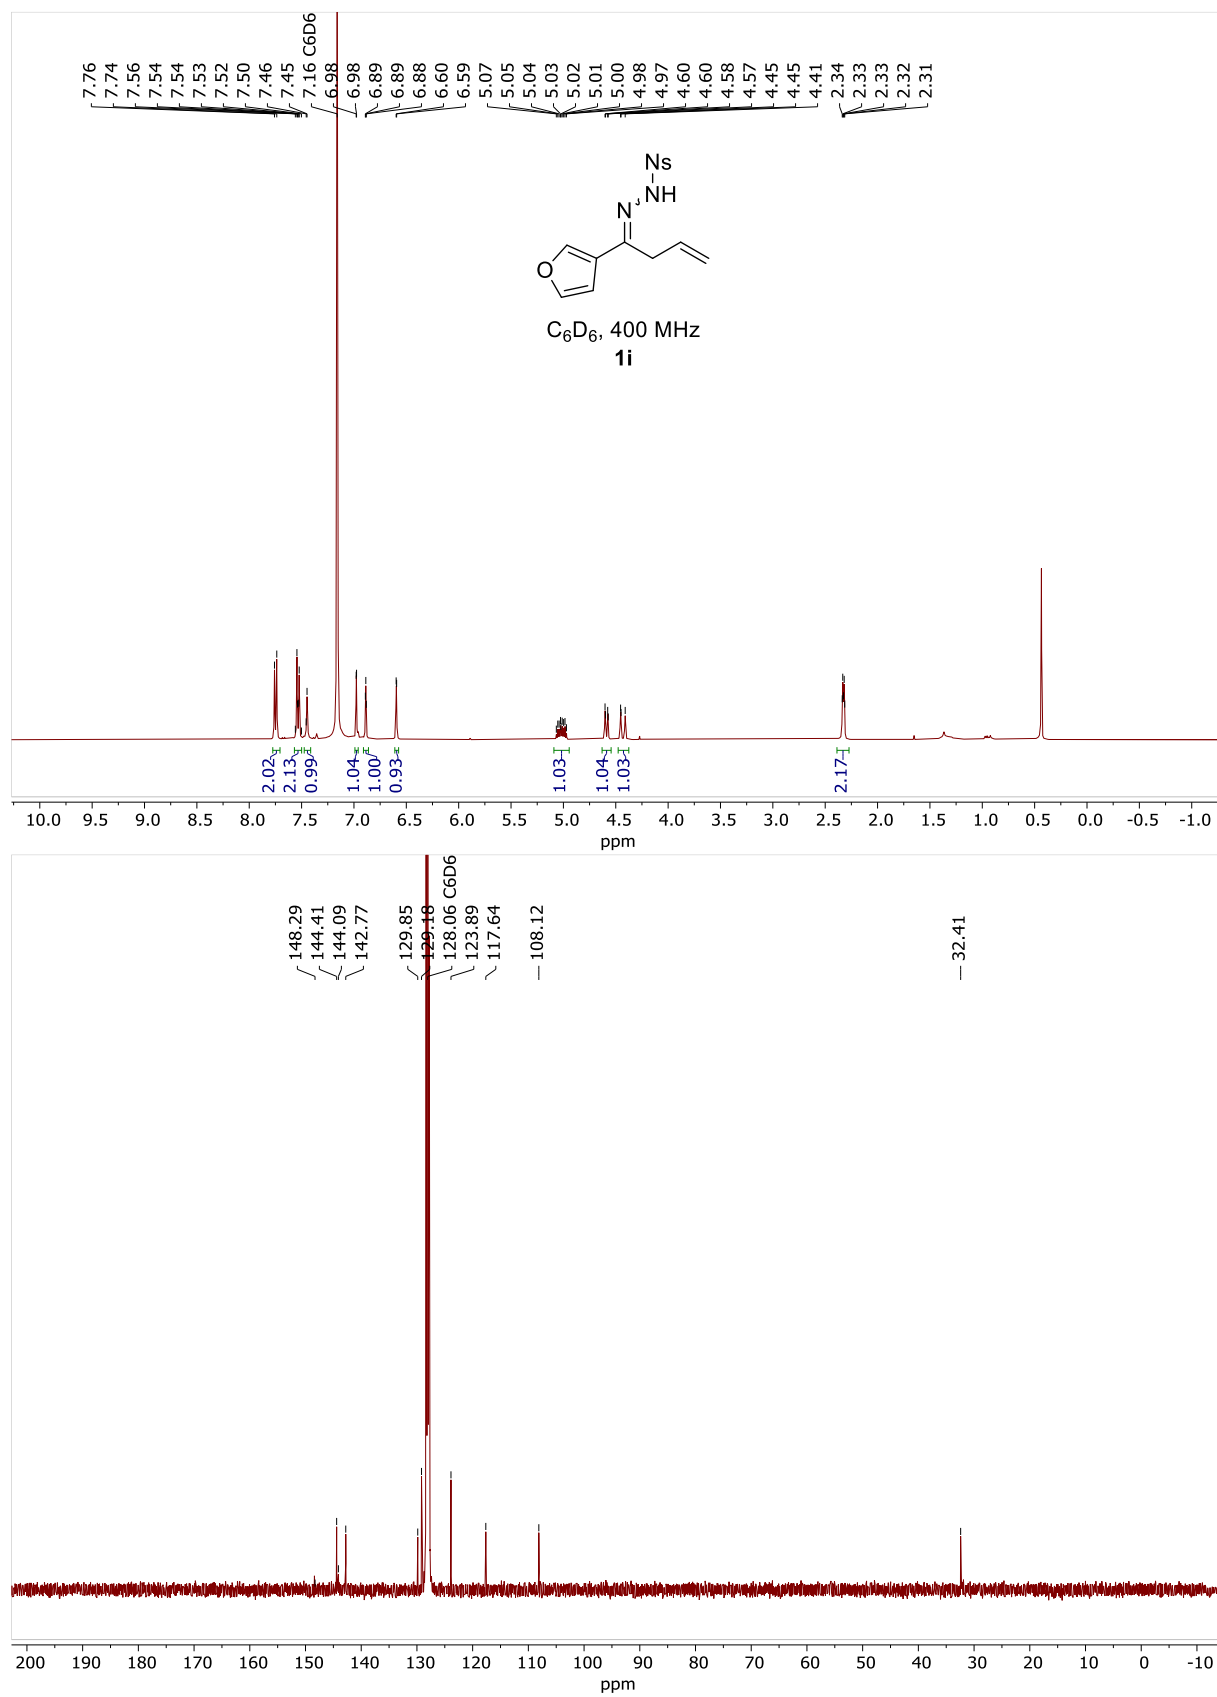

<sup>1</sup>H NMR and <sup>13</sup>C NMR spectrum of compound **S2k**

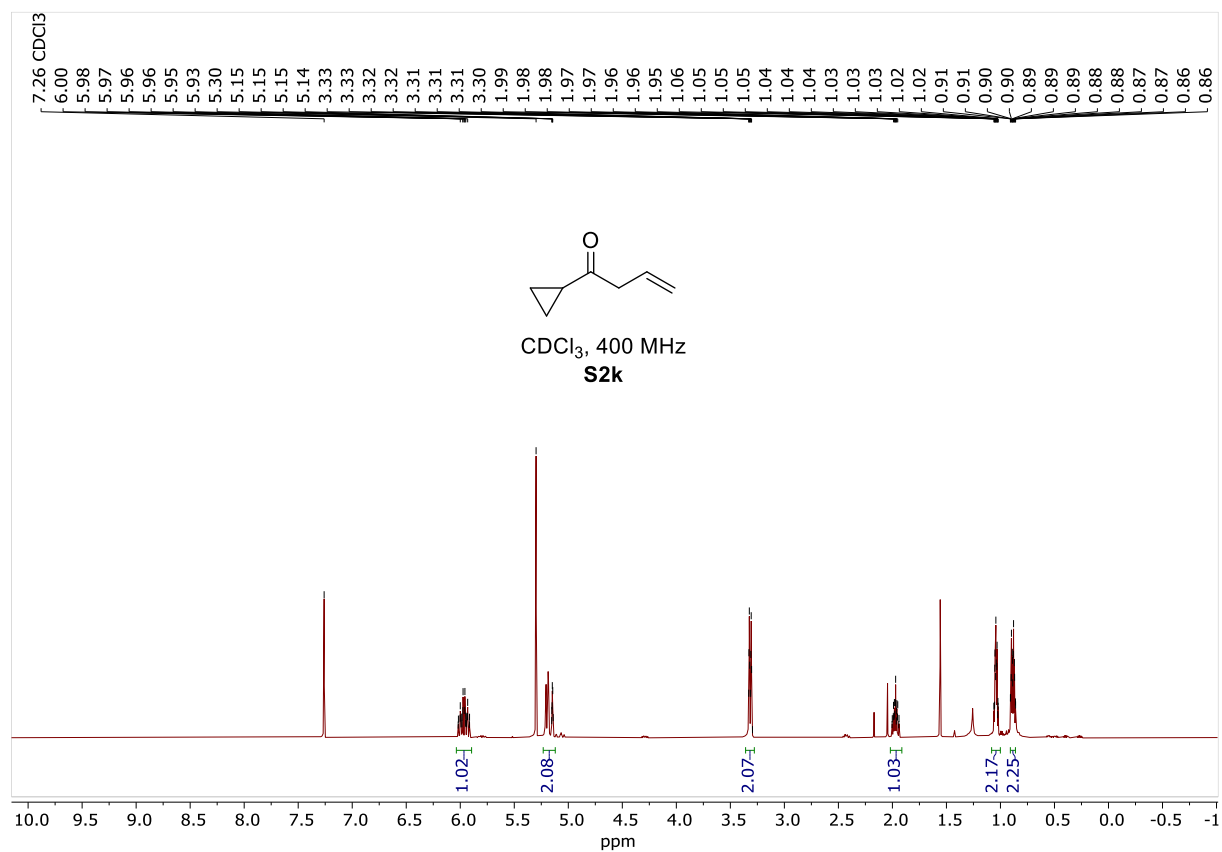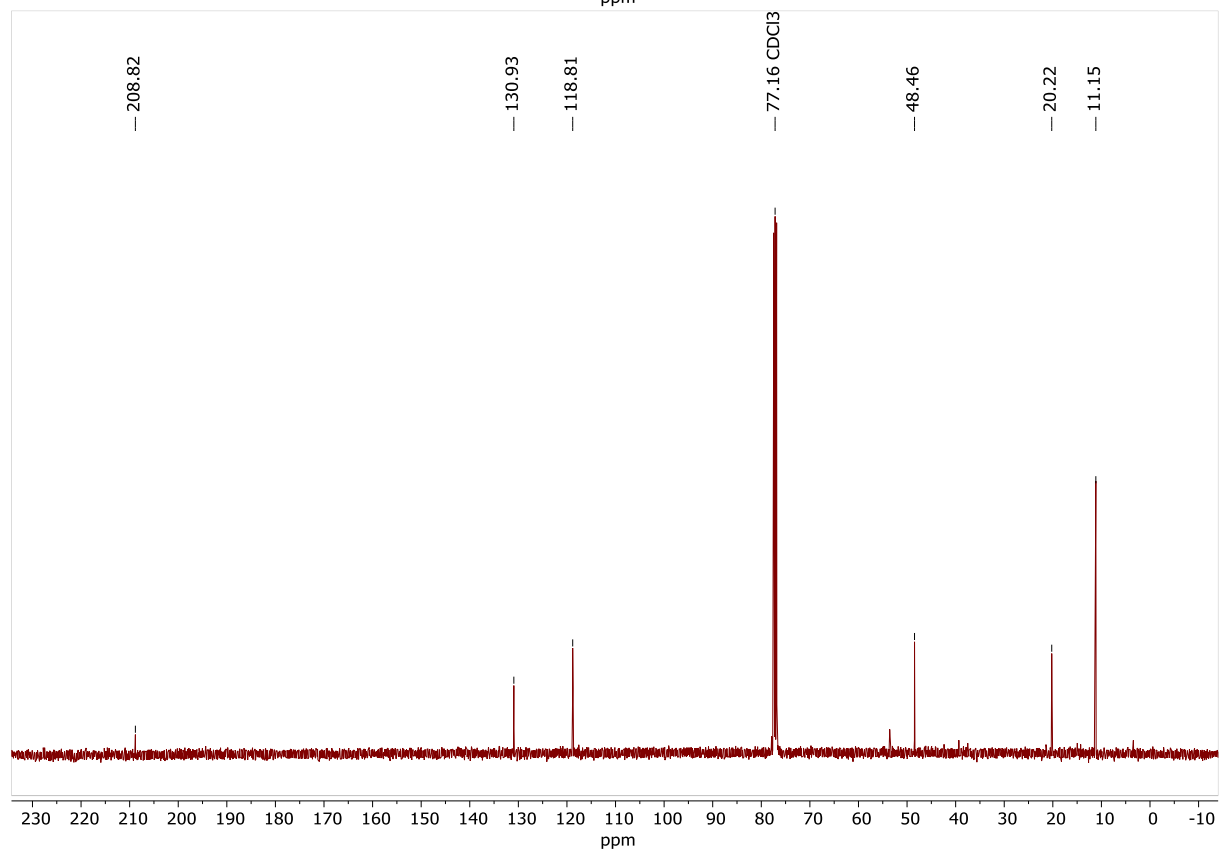

$^1\text{H}$  NMR and  $^{13}\text{C}$  NMR spectrum of compound **1k**

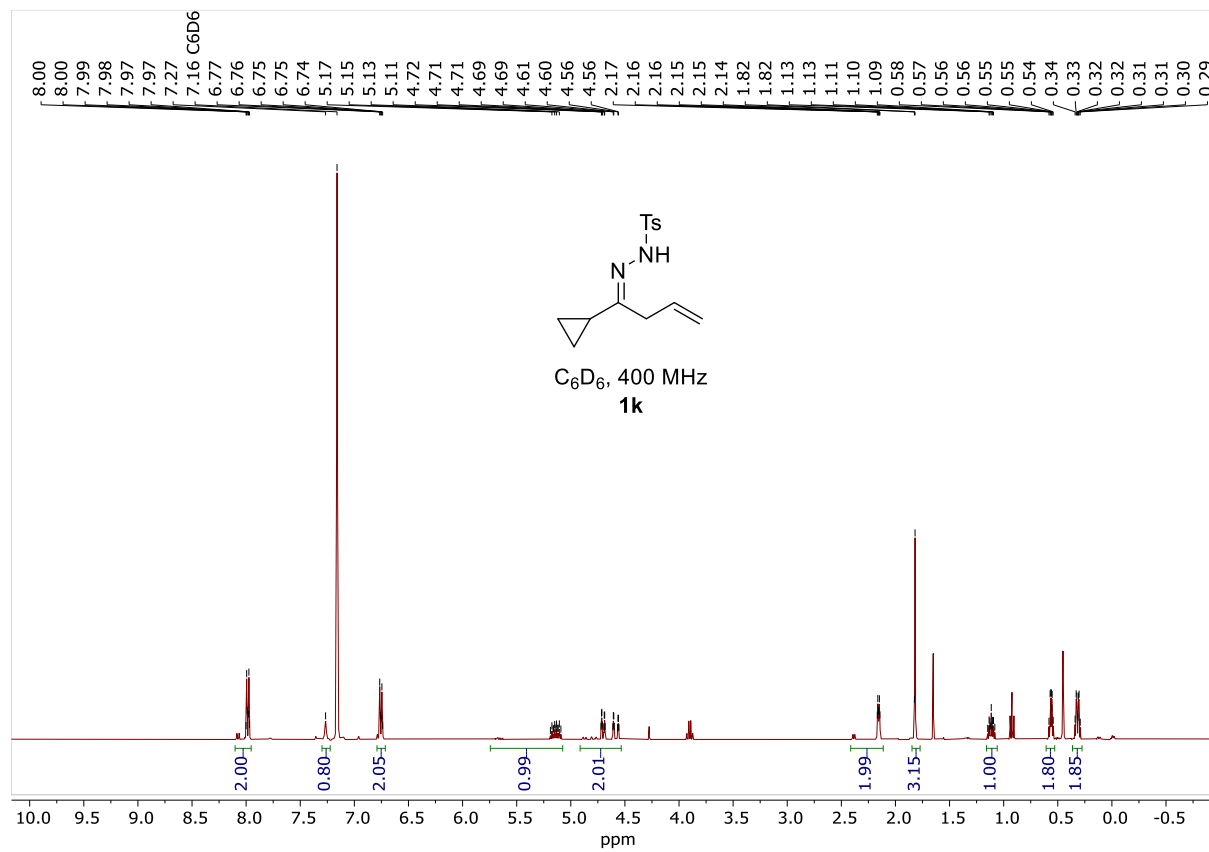

# $^1\text{H}$ NMR and $^{13}\text{C}$ NMR spectrum of compound **11**

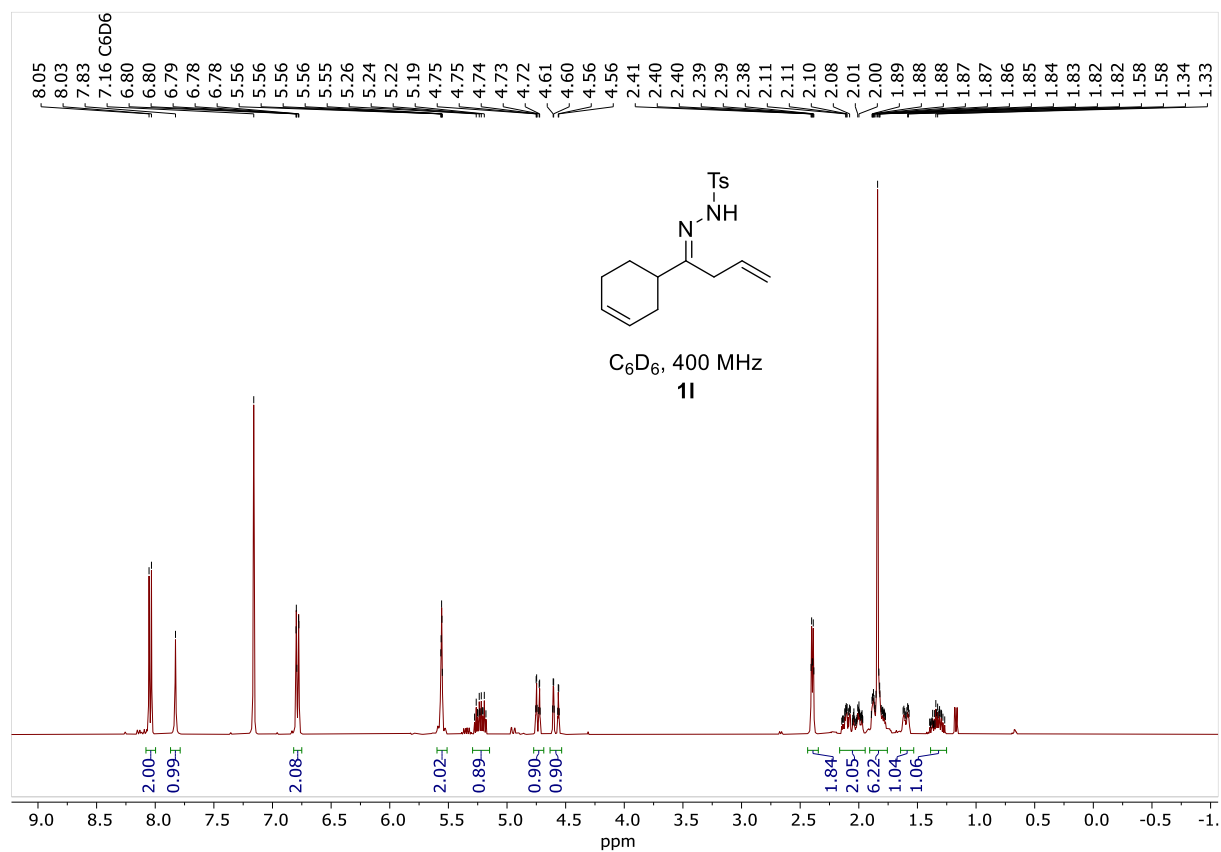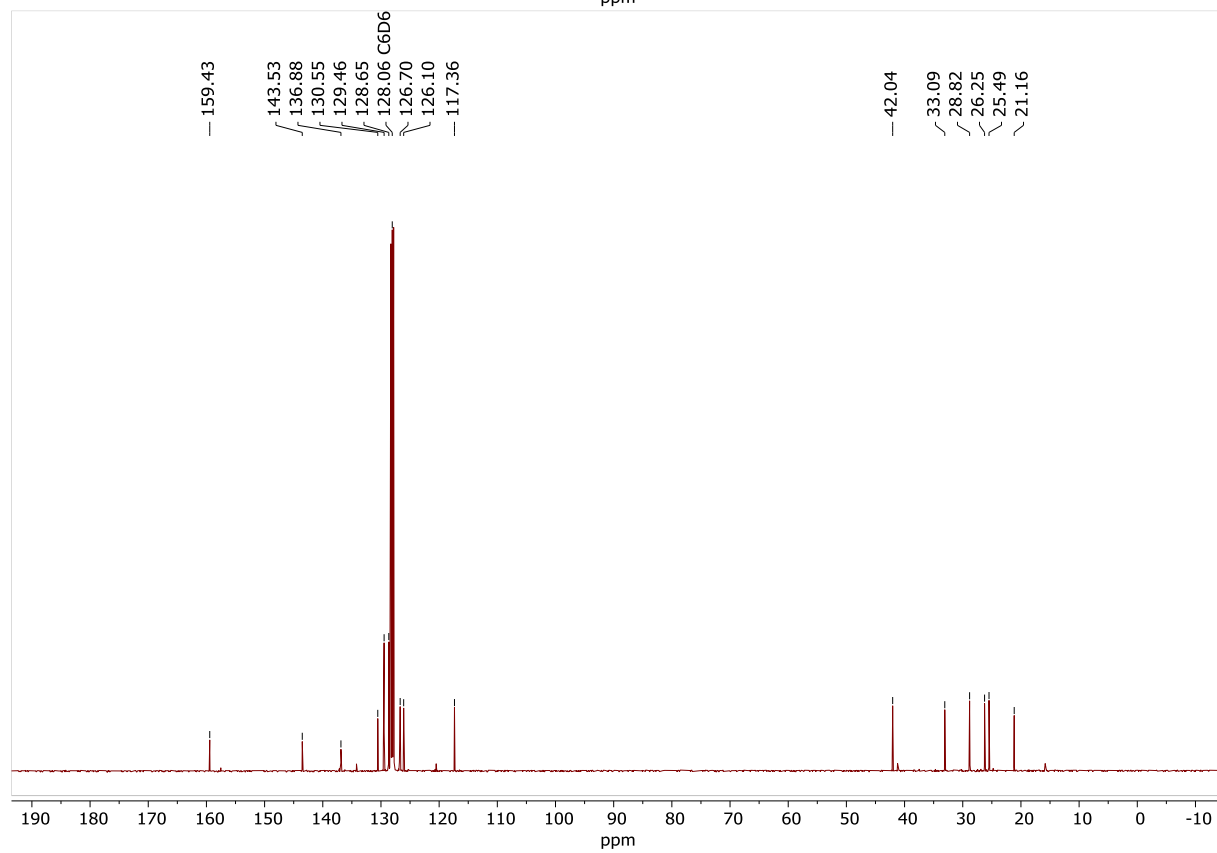

<sup>1</sup>H NMR and <sup>13</sup>C NMR spectrum of compound **1m**

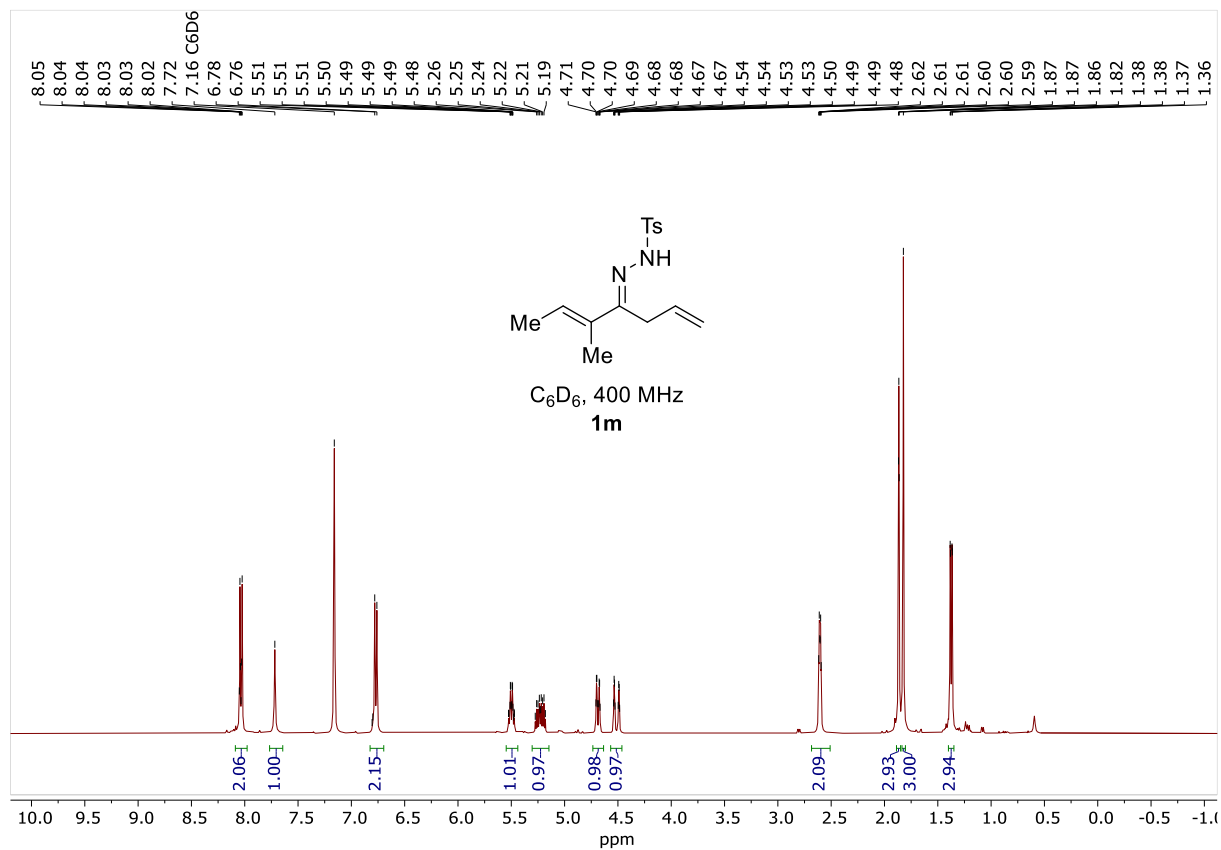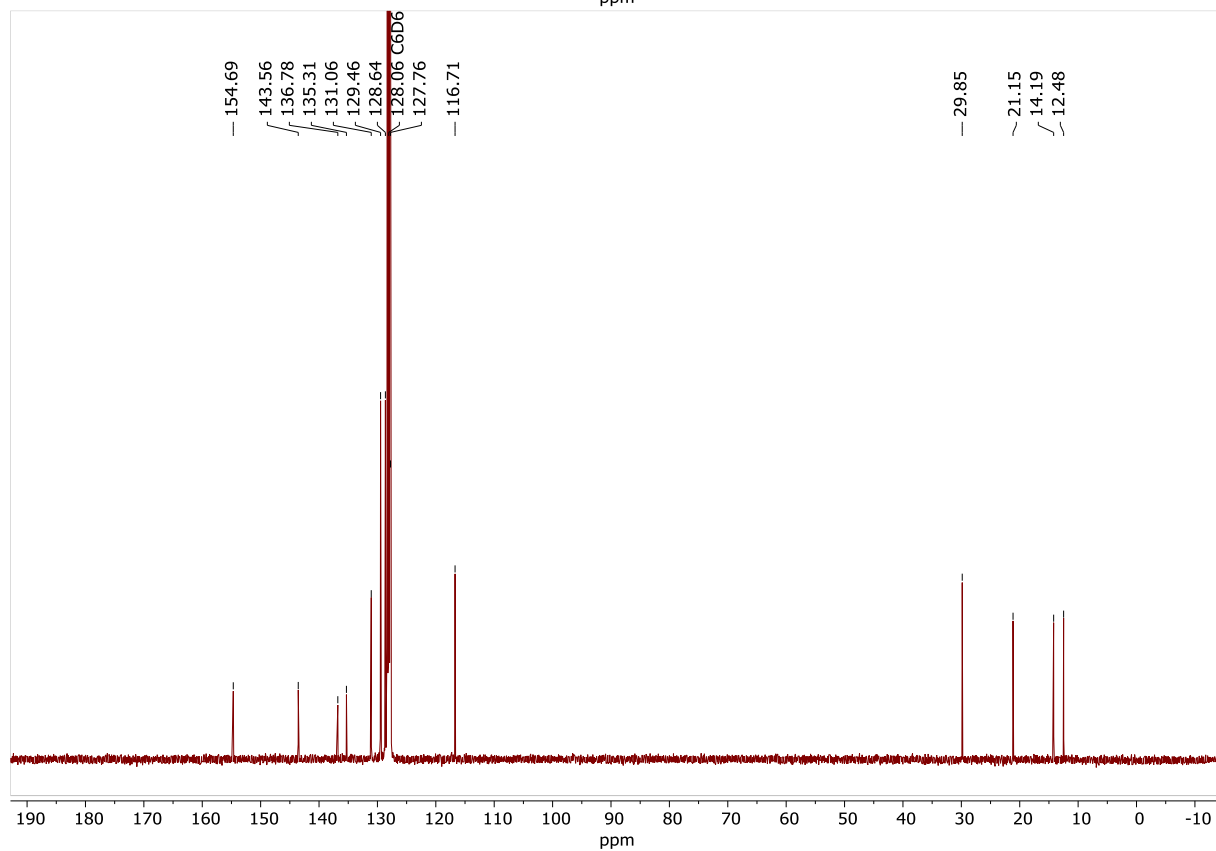



<sup>1</sup>H NMR and <sup>13</sup>C NMR spectrum of compound **1n**

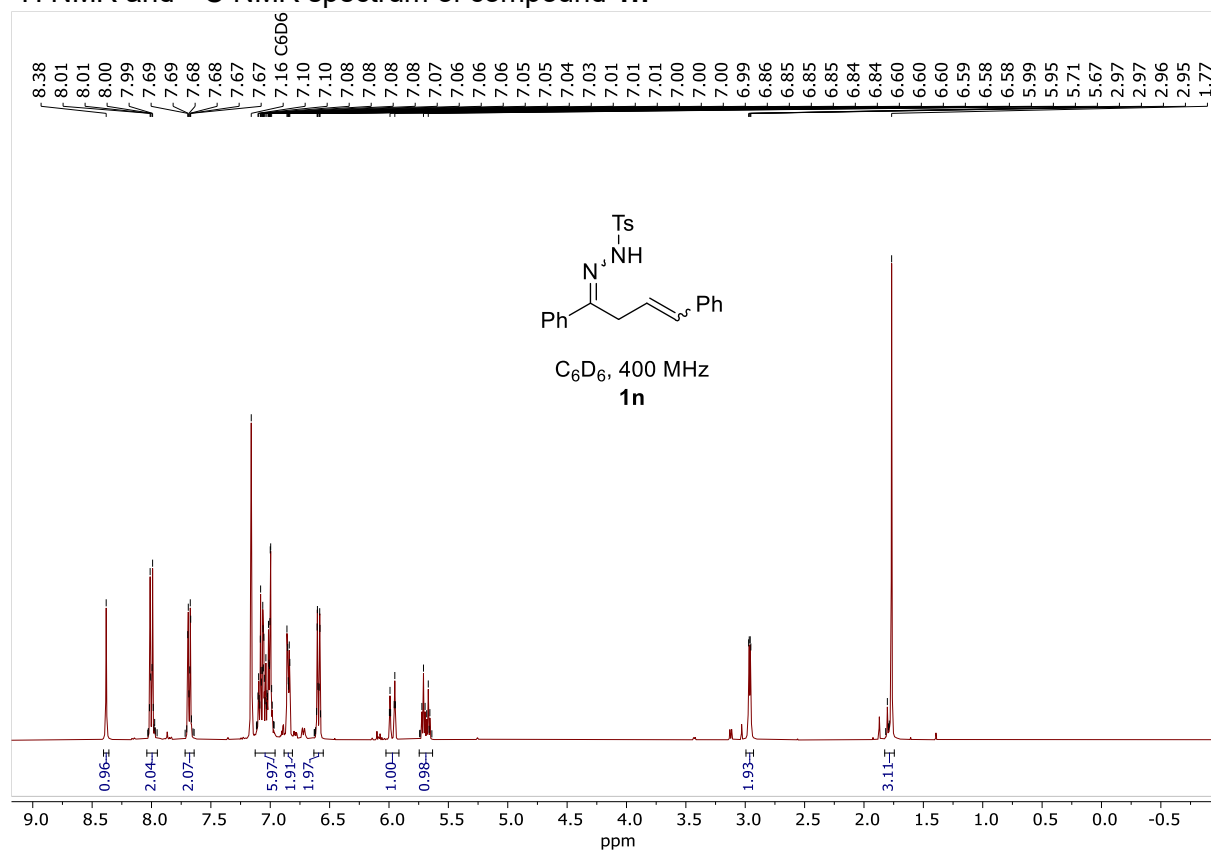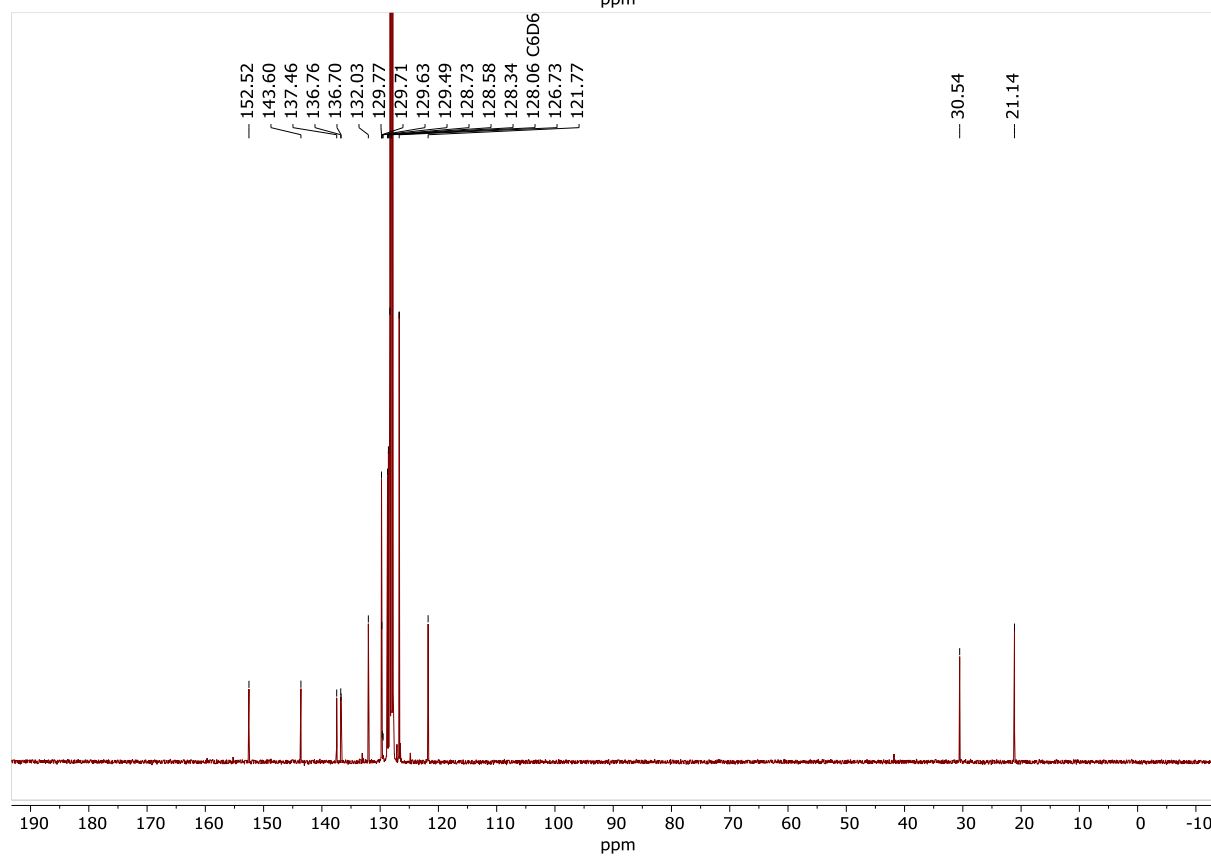

<sup>1</sup>H NMR and <sup>13</sup>C NMR spectrum of compound **1o**

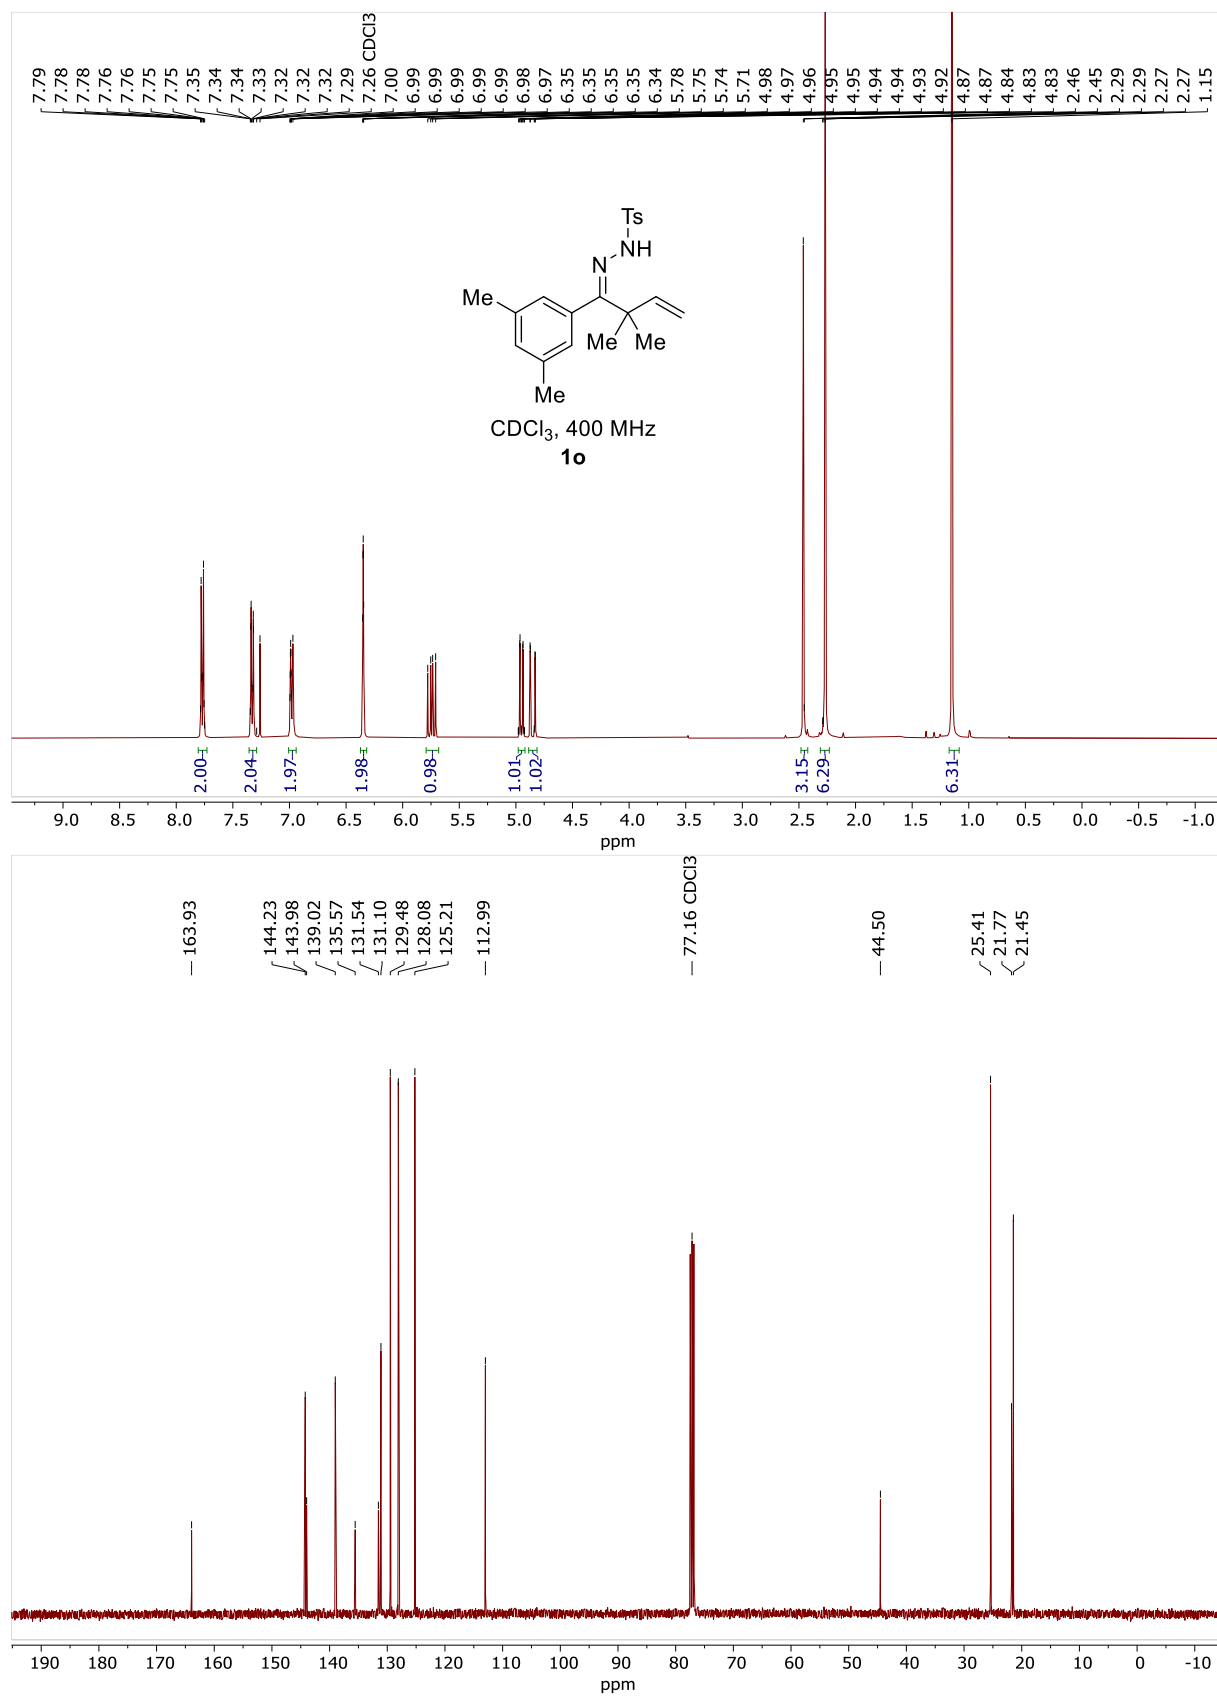

<sup>1</sup>H NMR and <sup>13</sup>C NMR spectrum of compound **1p**

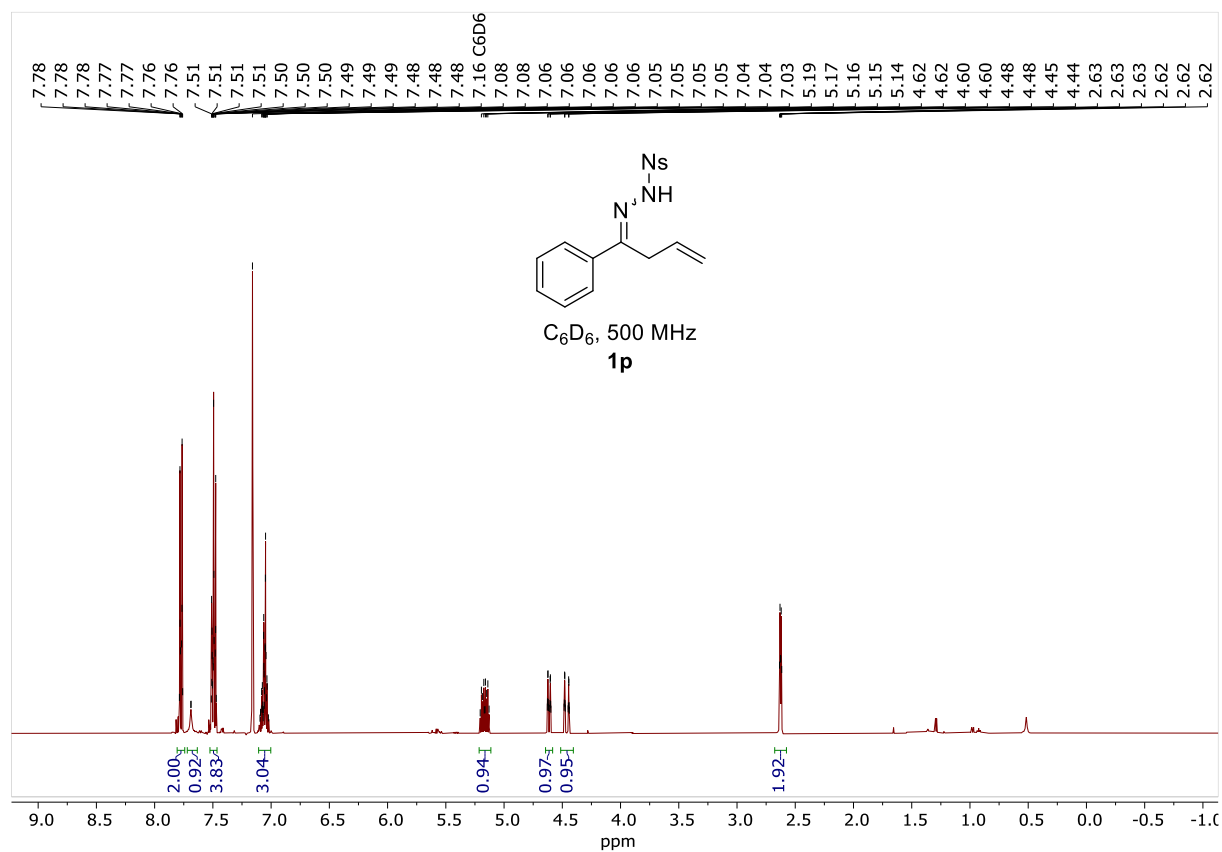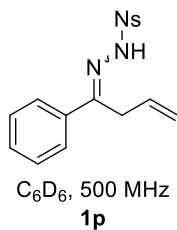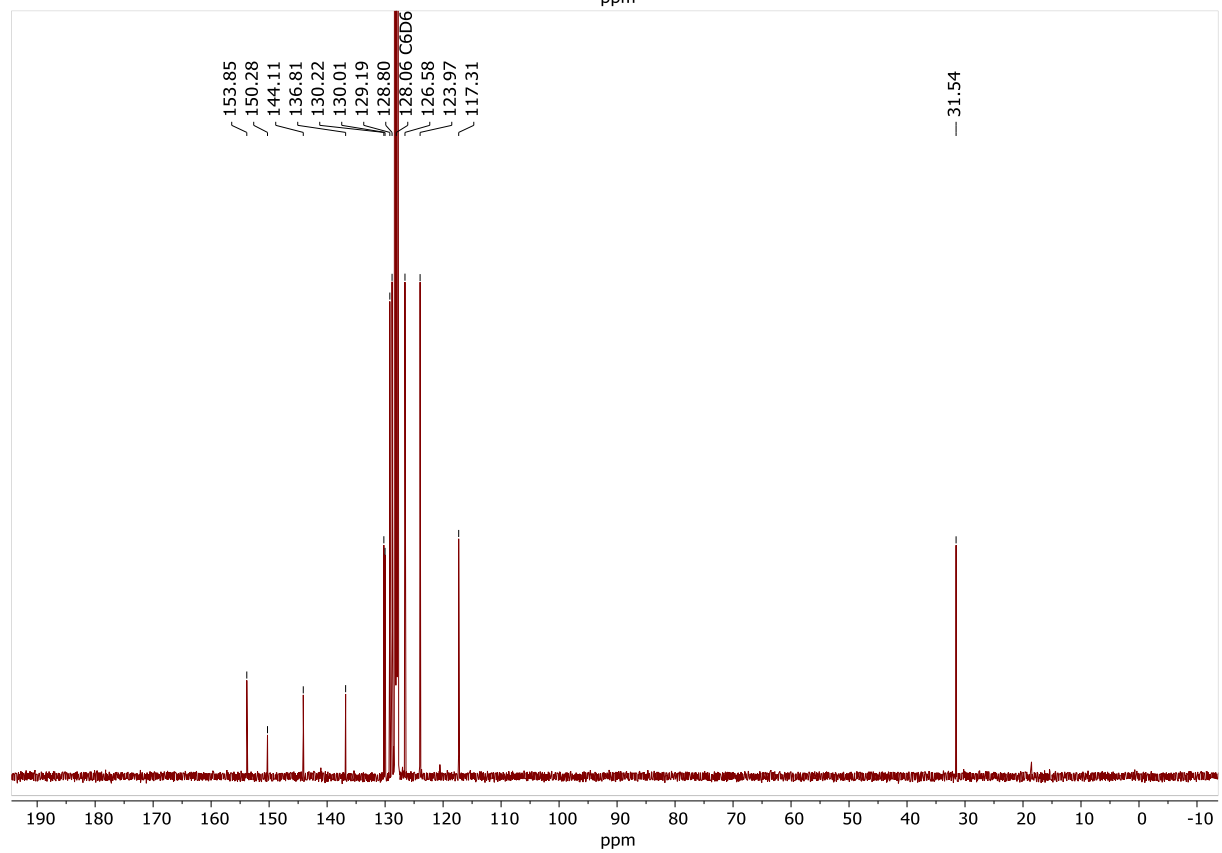

<sup>1</sup>H NMR and <sup>13</sup>C NMR spectrum of compound **1q**

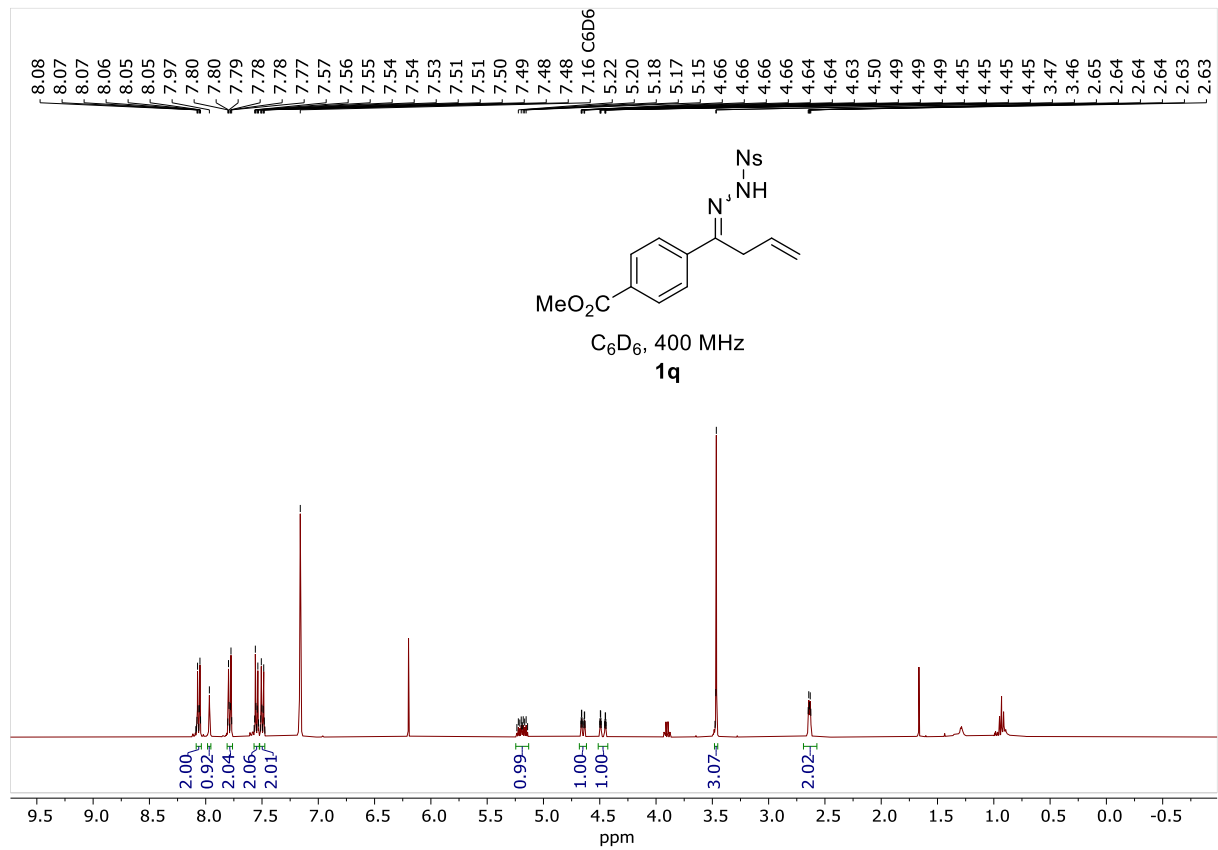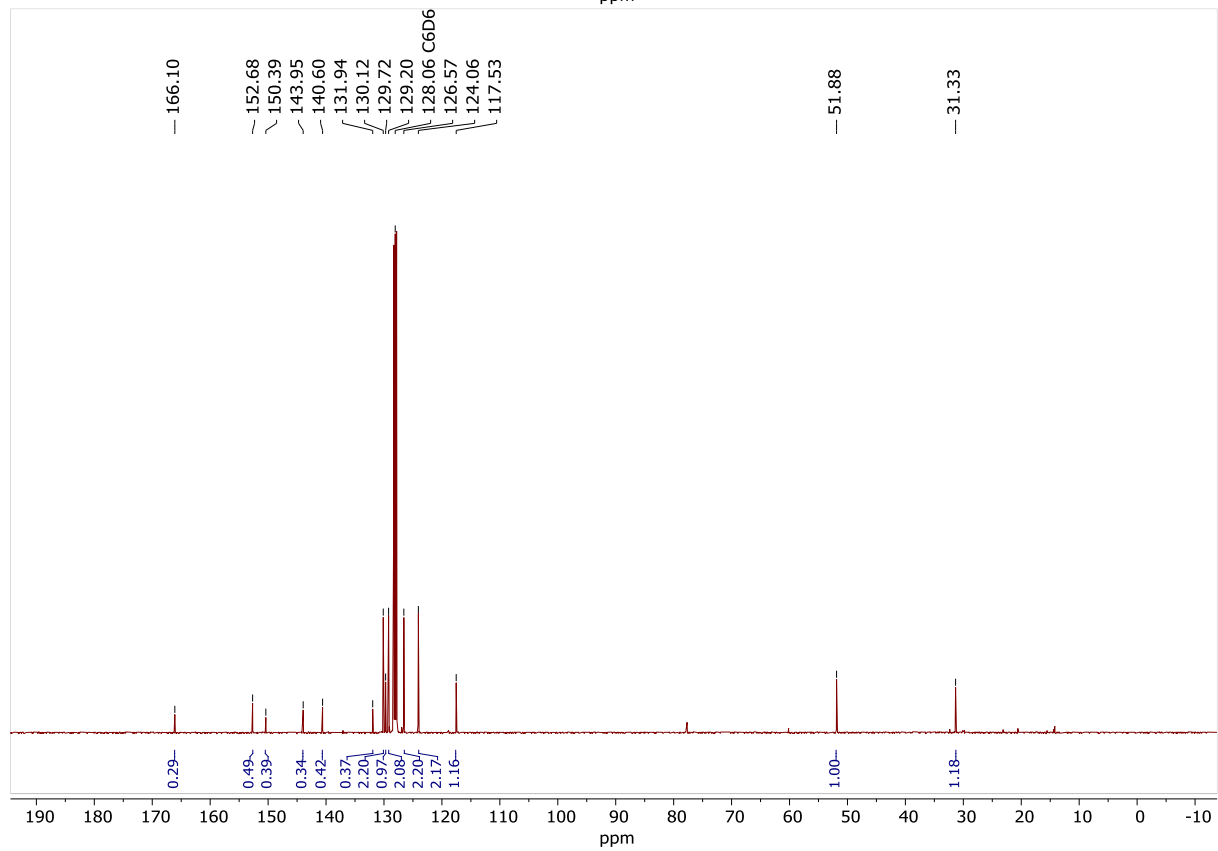

$^1\text{H}$  NMR and  $^{13}\text{C}$  NMR spectrum of compound **1r**

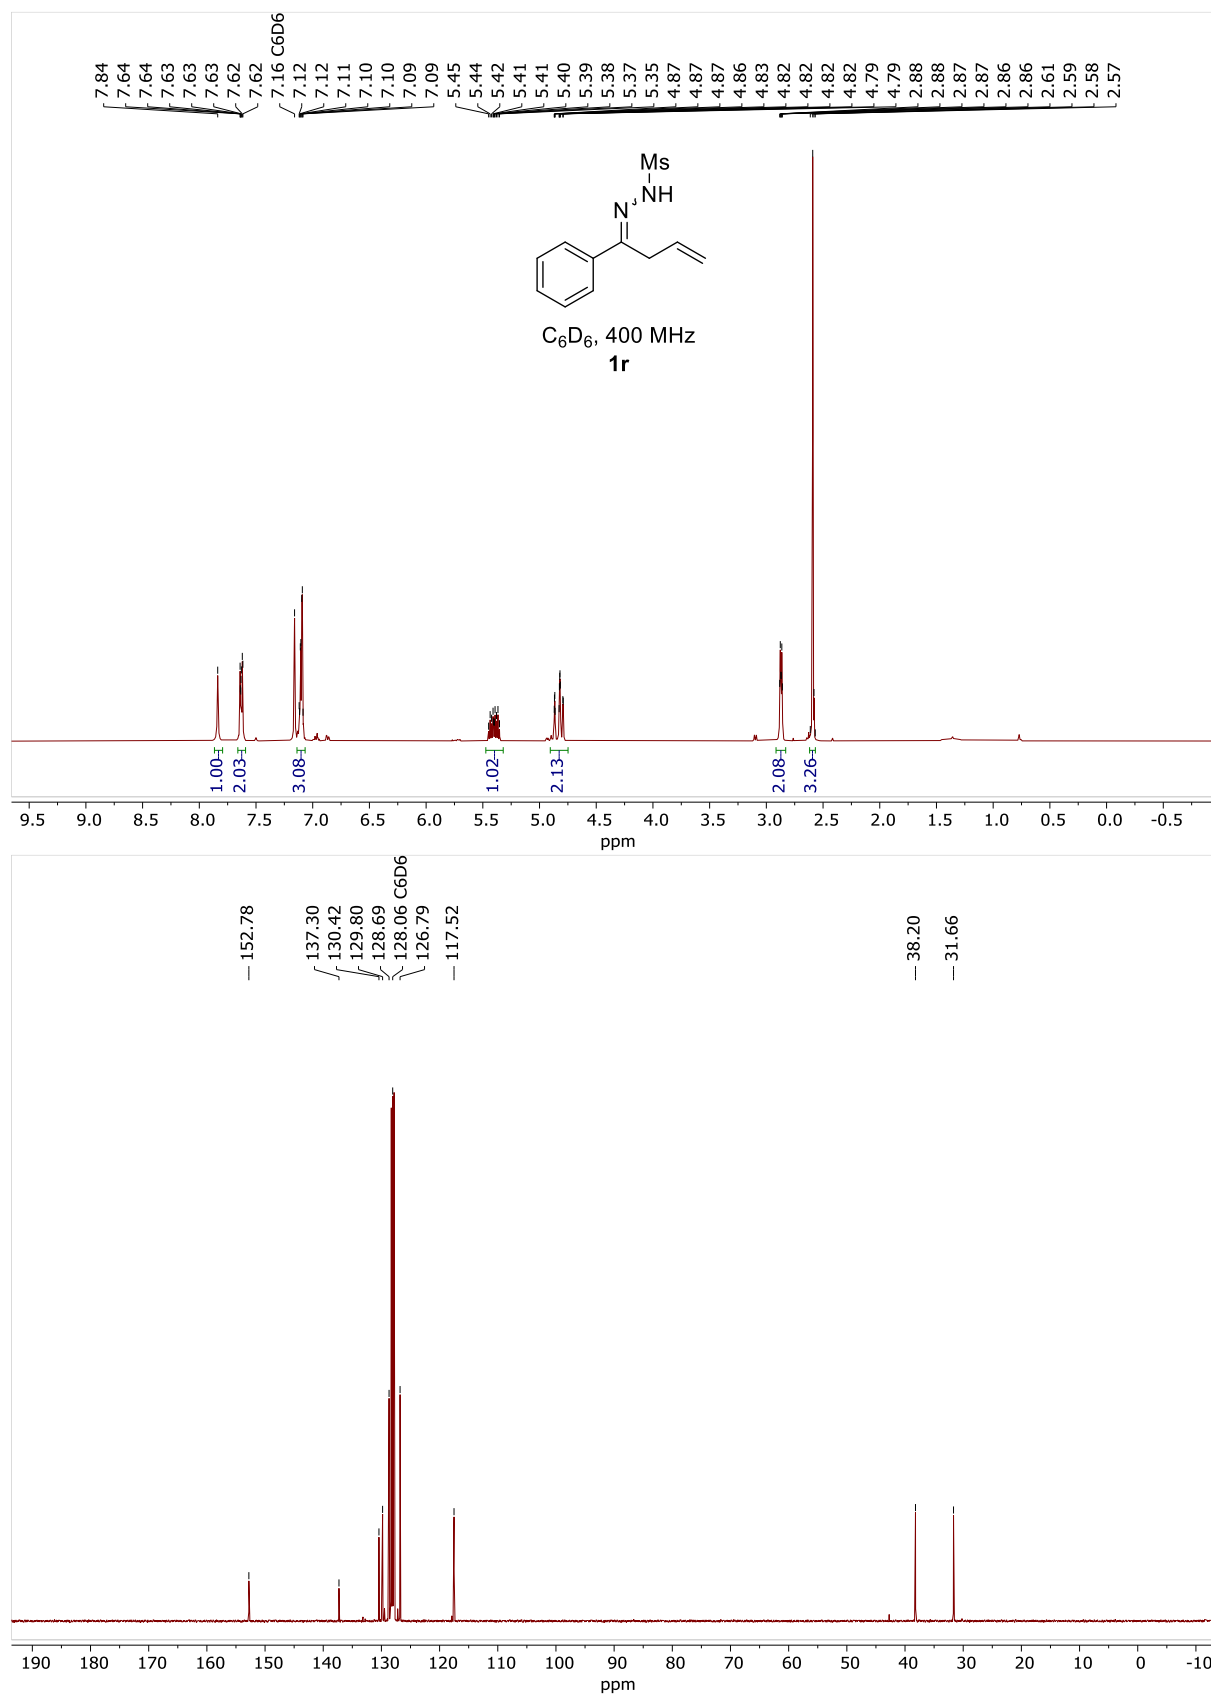

$^1\text{H}$  NMR and  $^{13}\text{C}$  NMR spectrum of compound **1s**

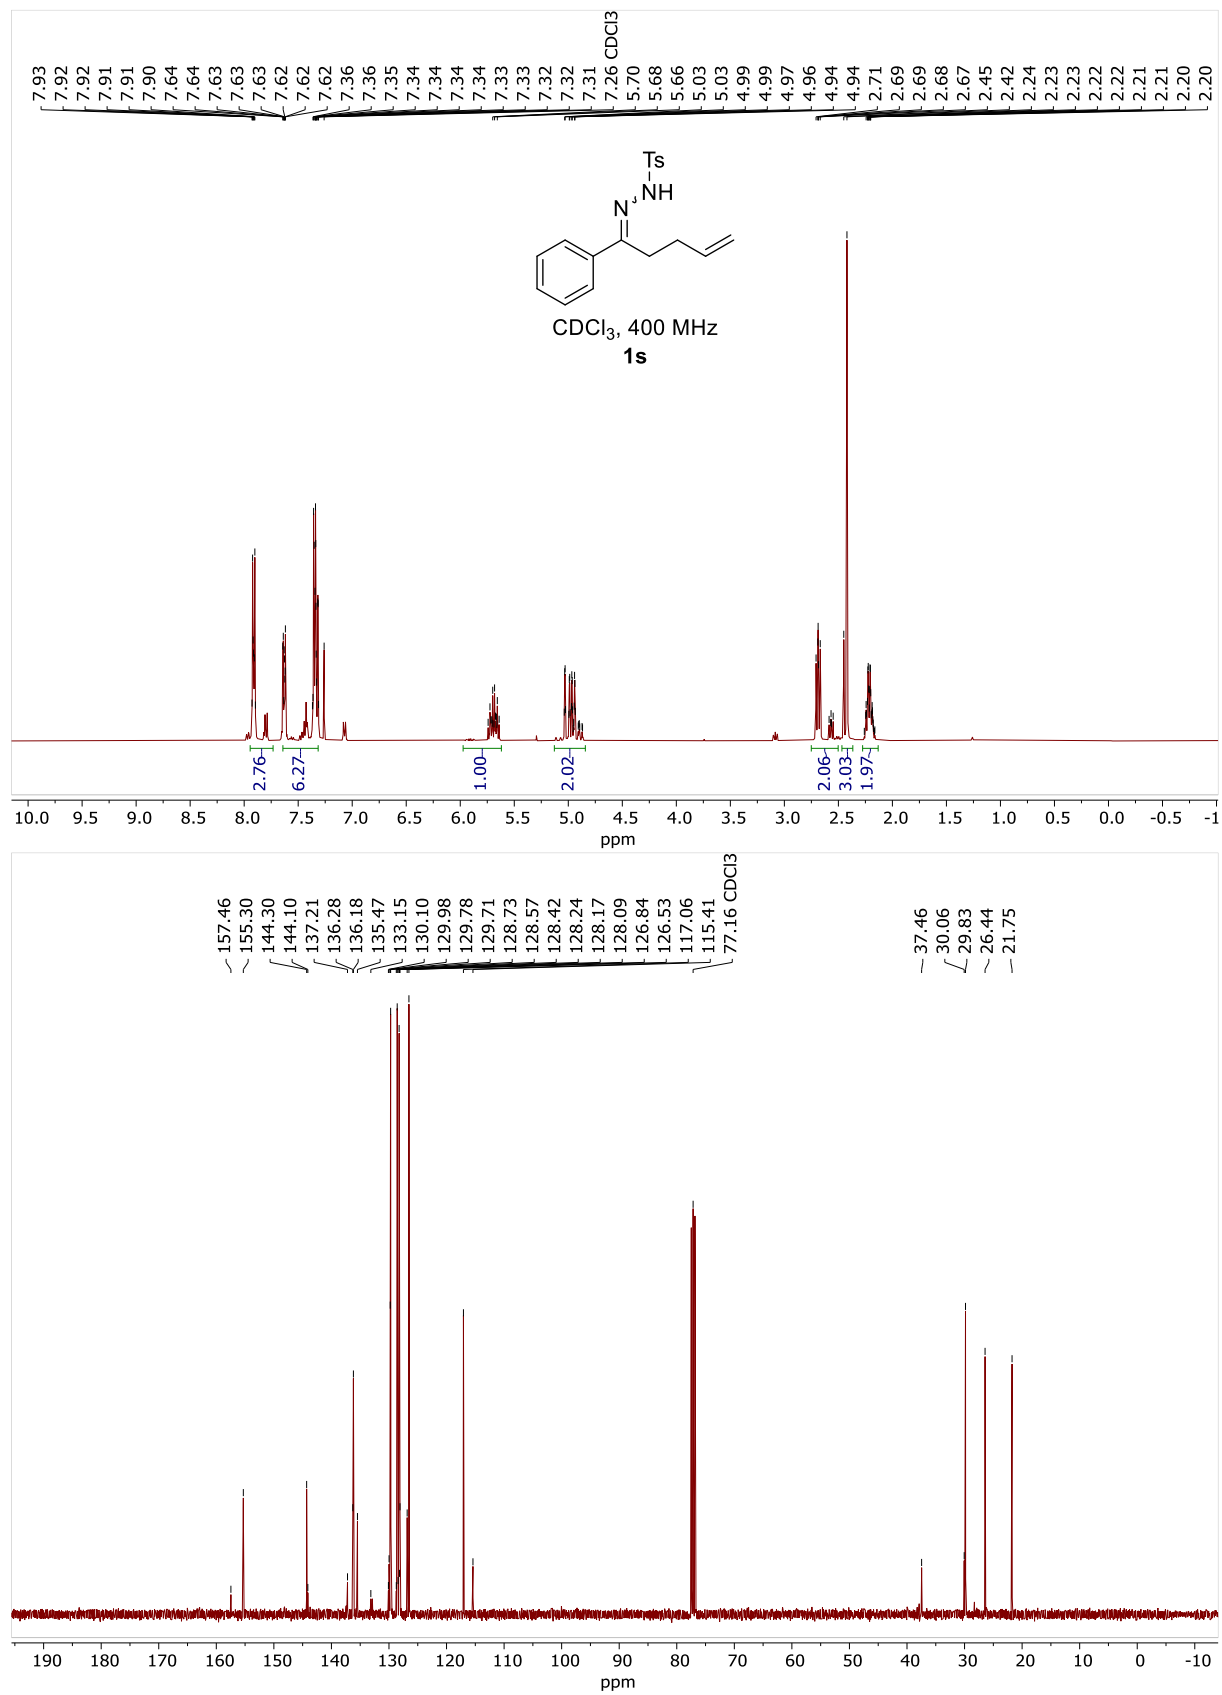

$^1\text{H}$  NMR and  $^{13}\text{C}$  NMR spectrum of compound **1t**

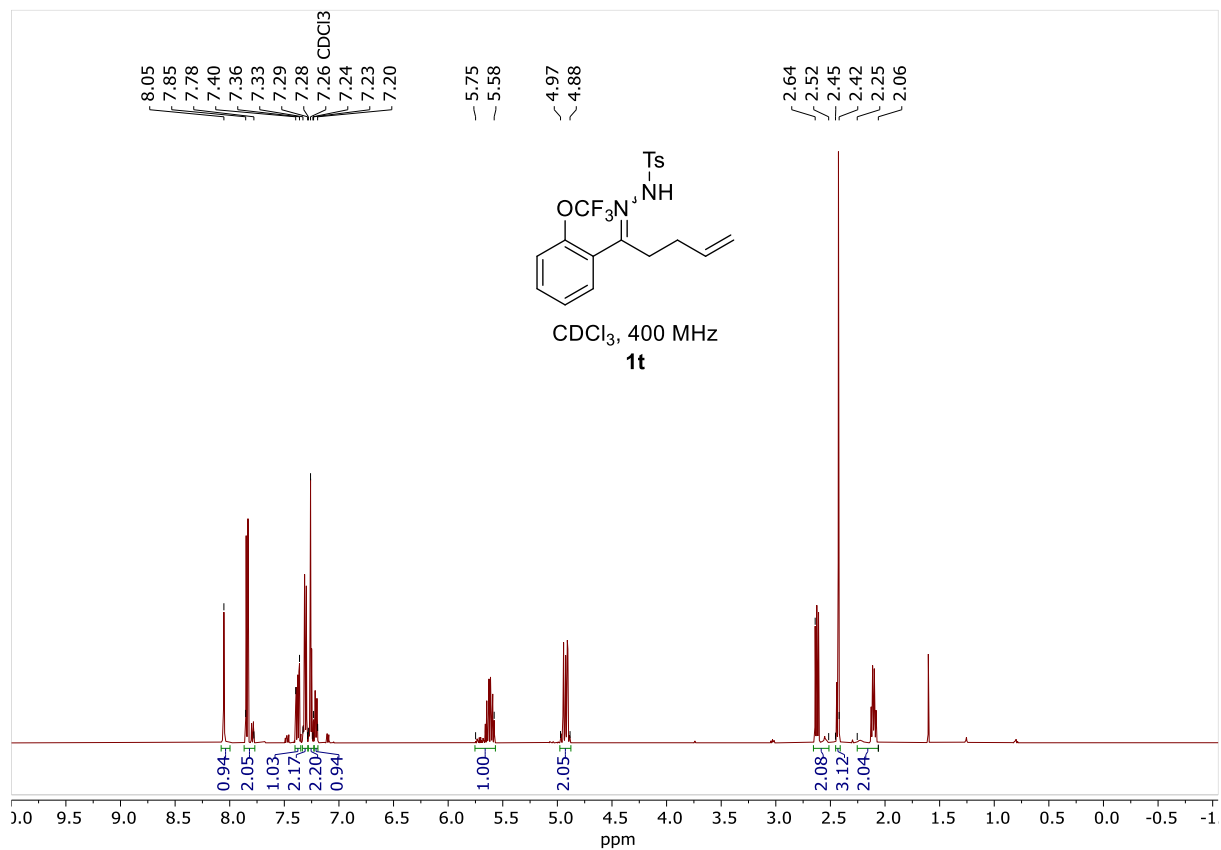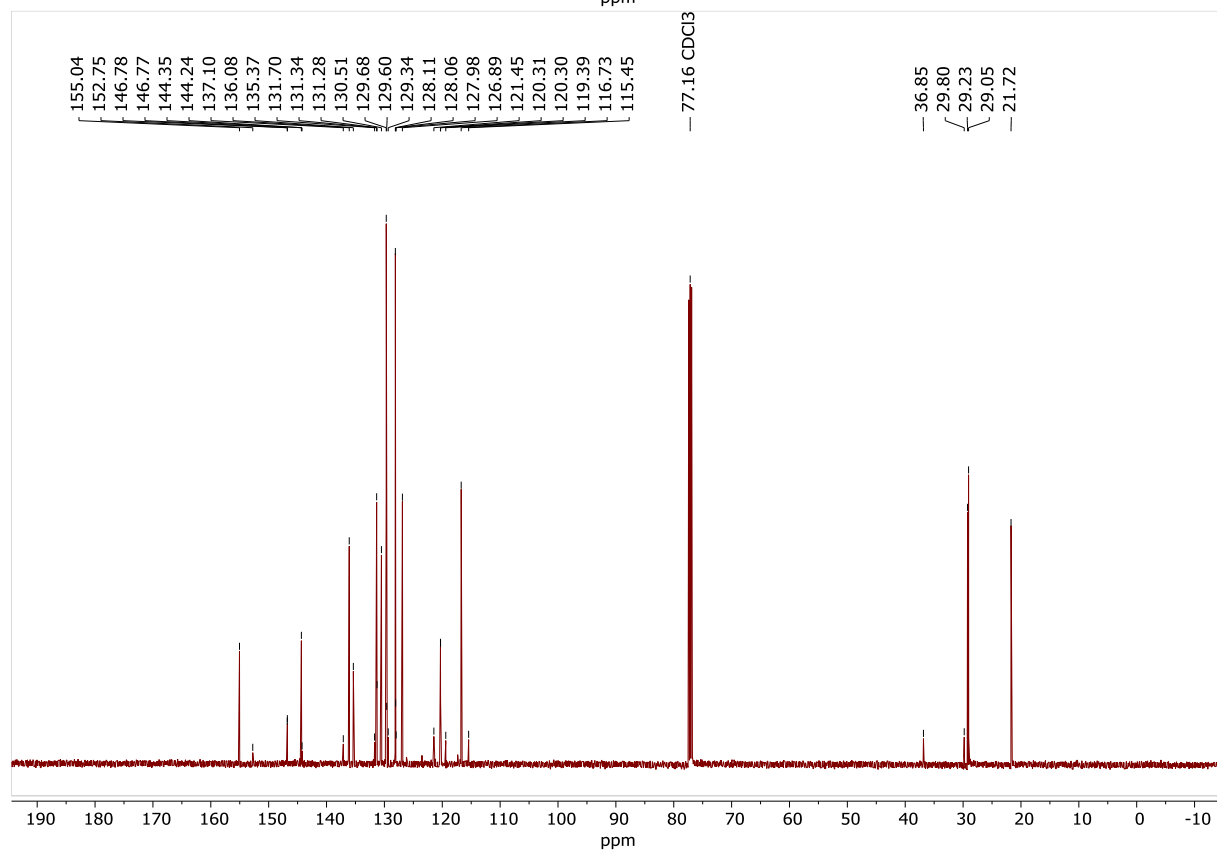

<sup>1</sup>H NMR and <sup>13</sup>C NMR spectrum of compound **1u**

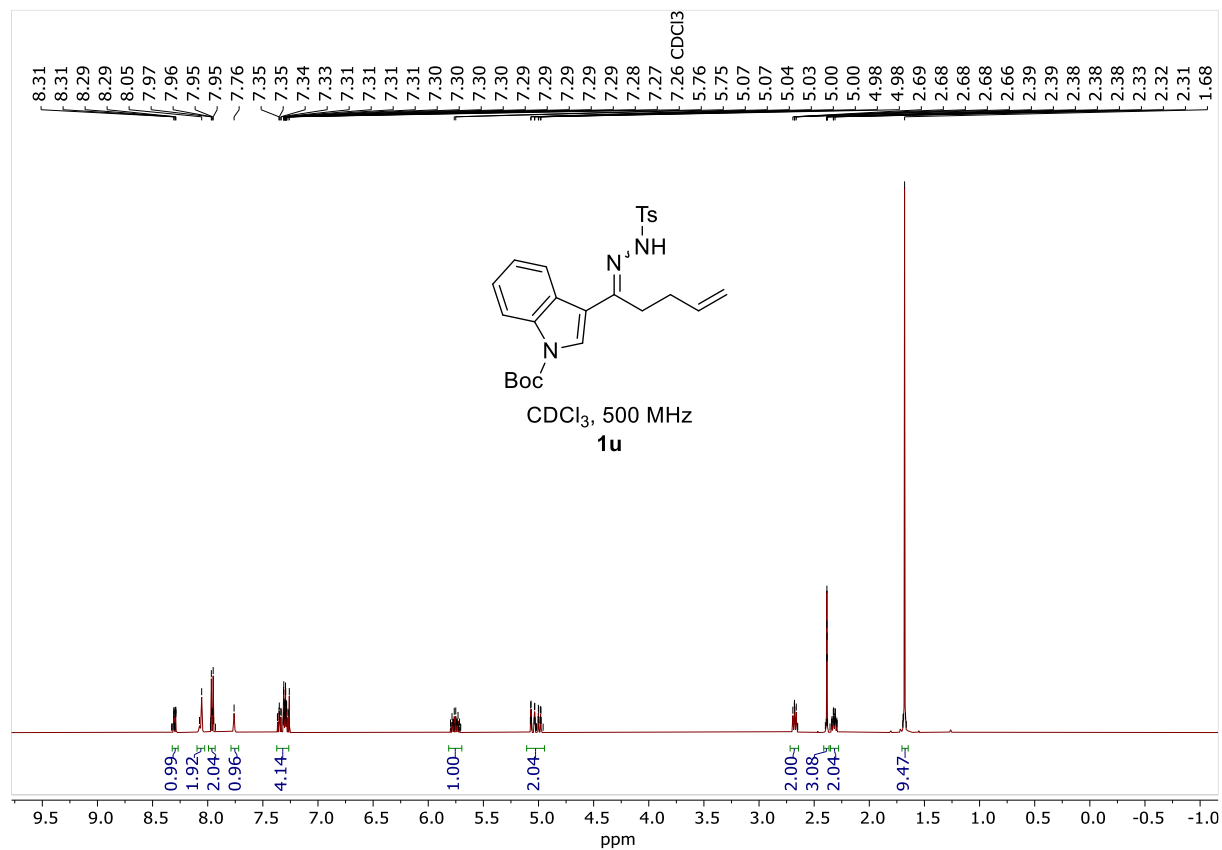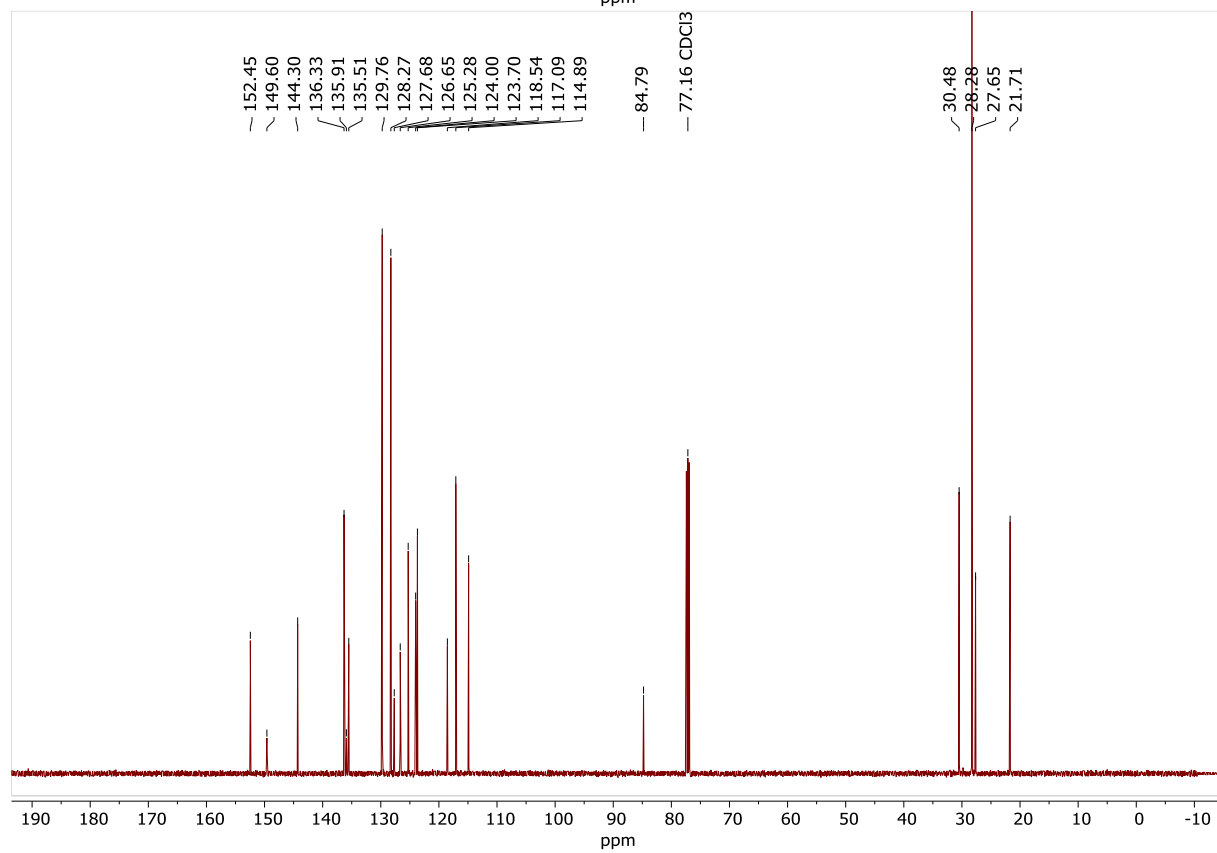



# $^1\text{H}$ NMR and $^{13}\text{C}$ NMR spectrum of compound **1v**

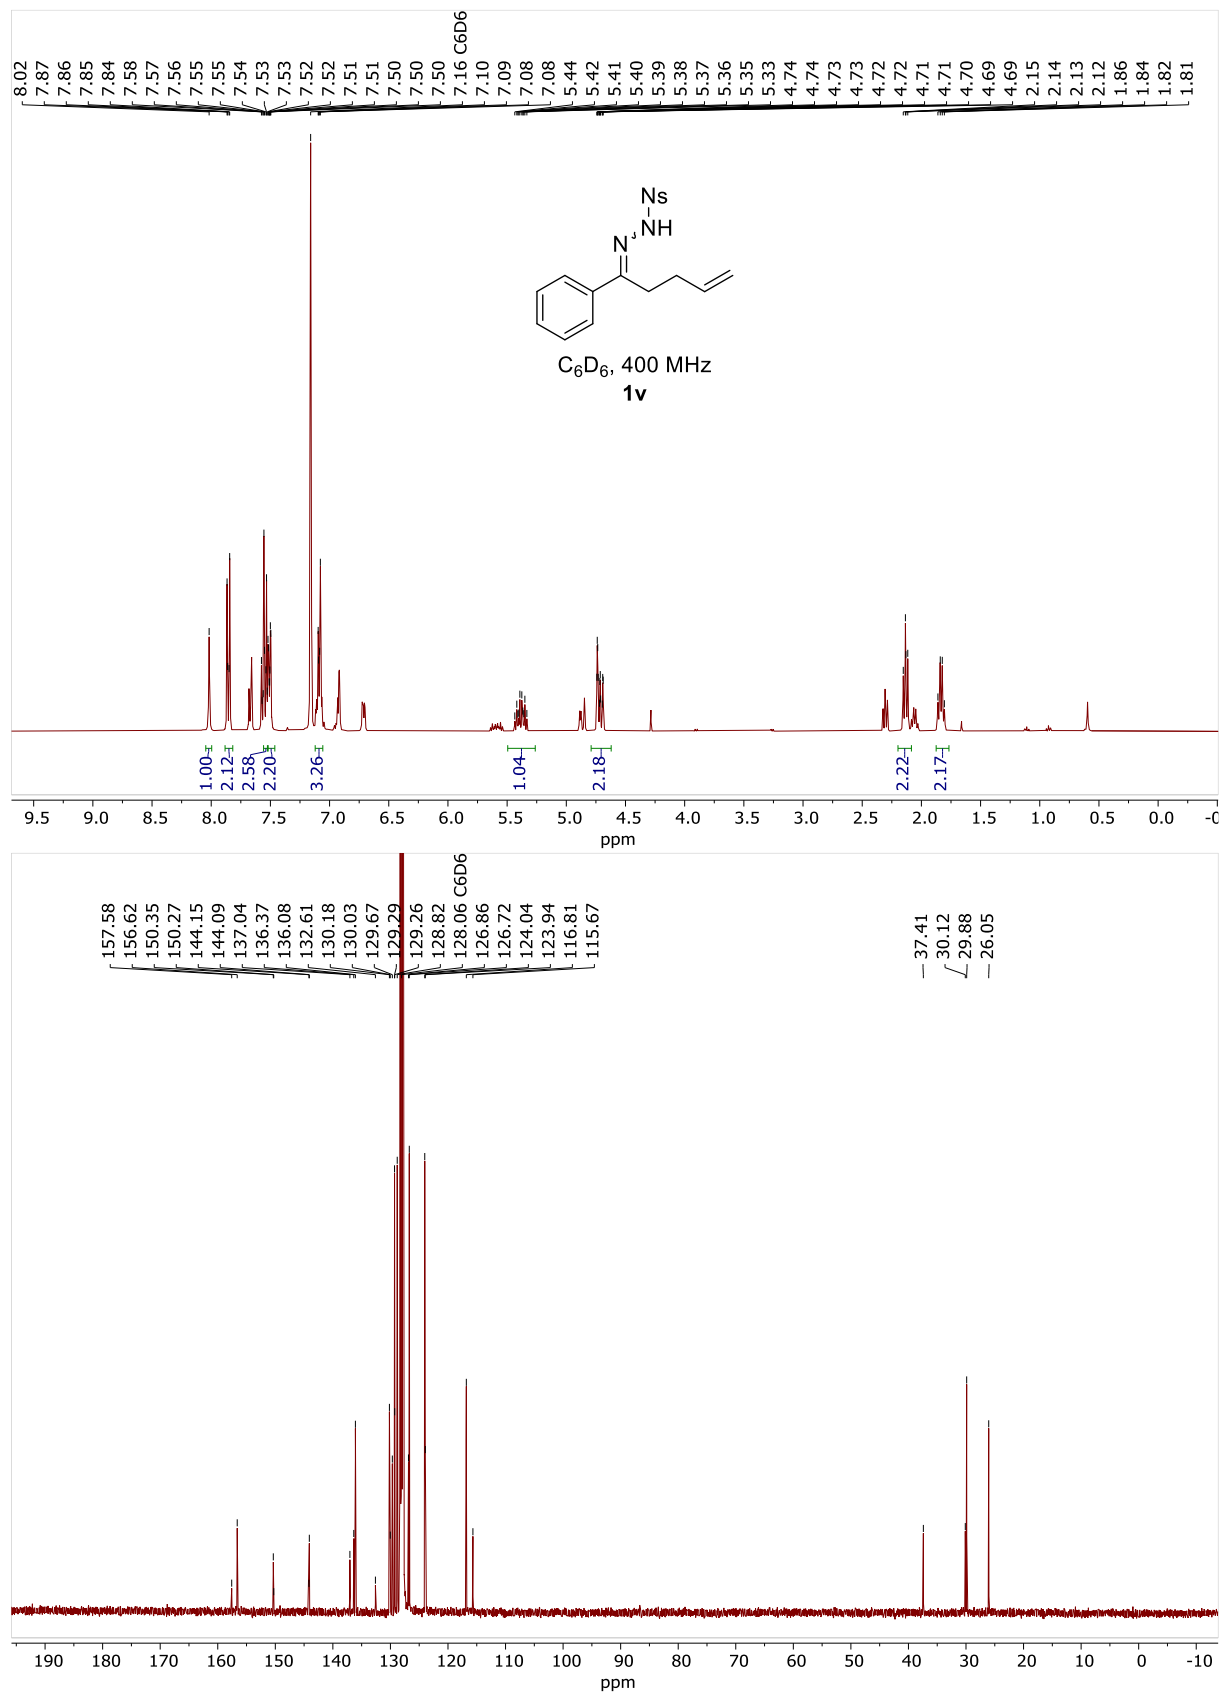

<sup>1</sup>H NMR and <sup>13</sup>C NMR spectrum of compound **5a**

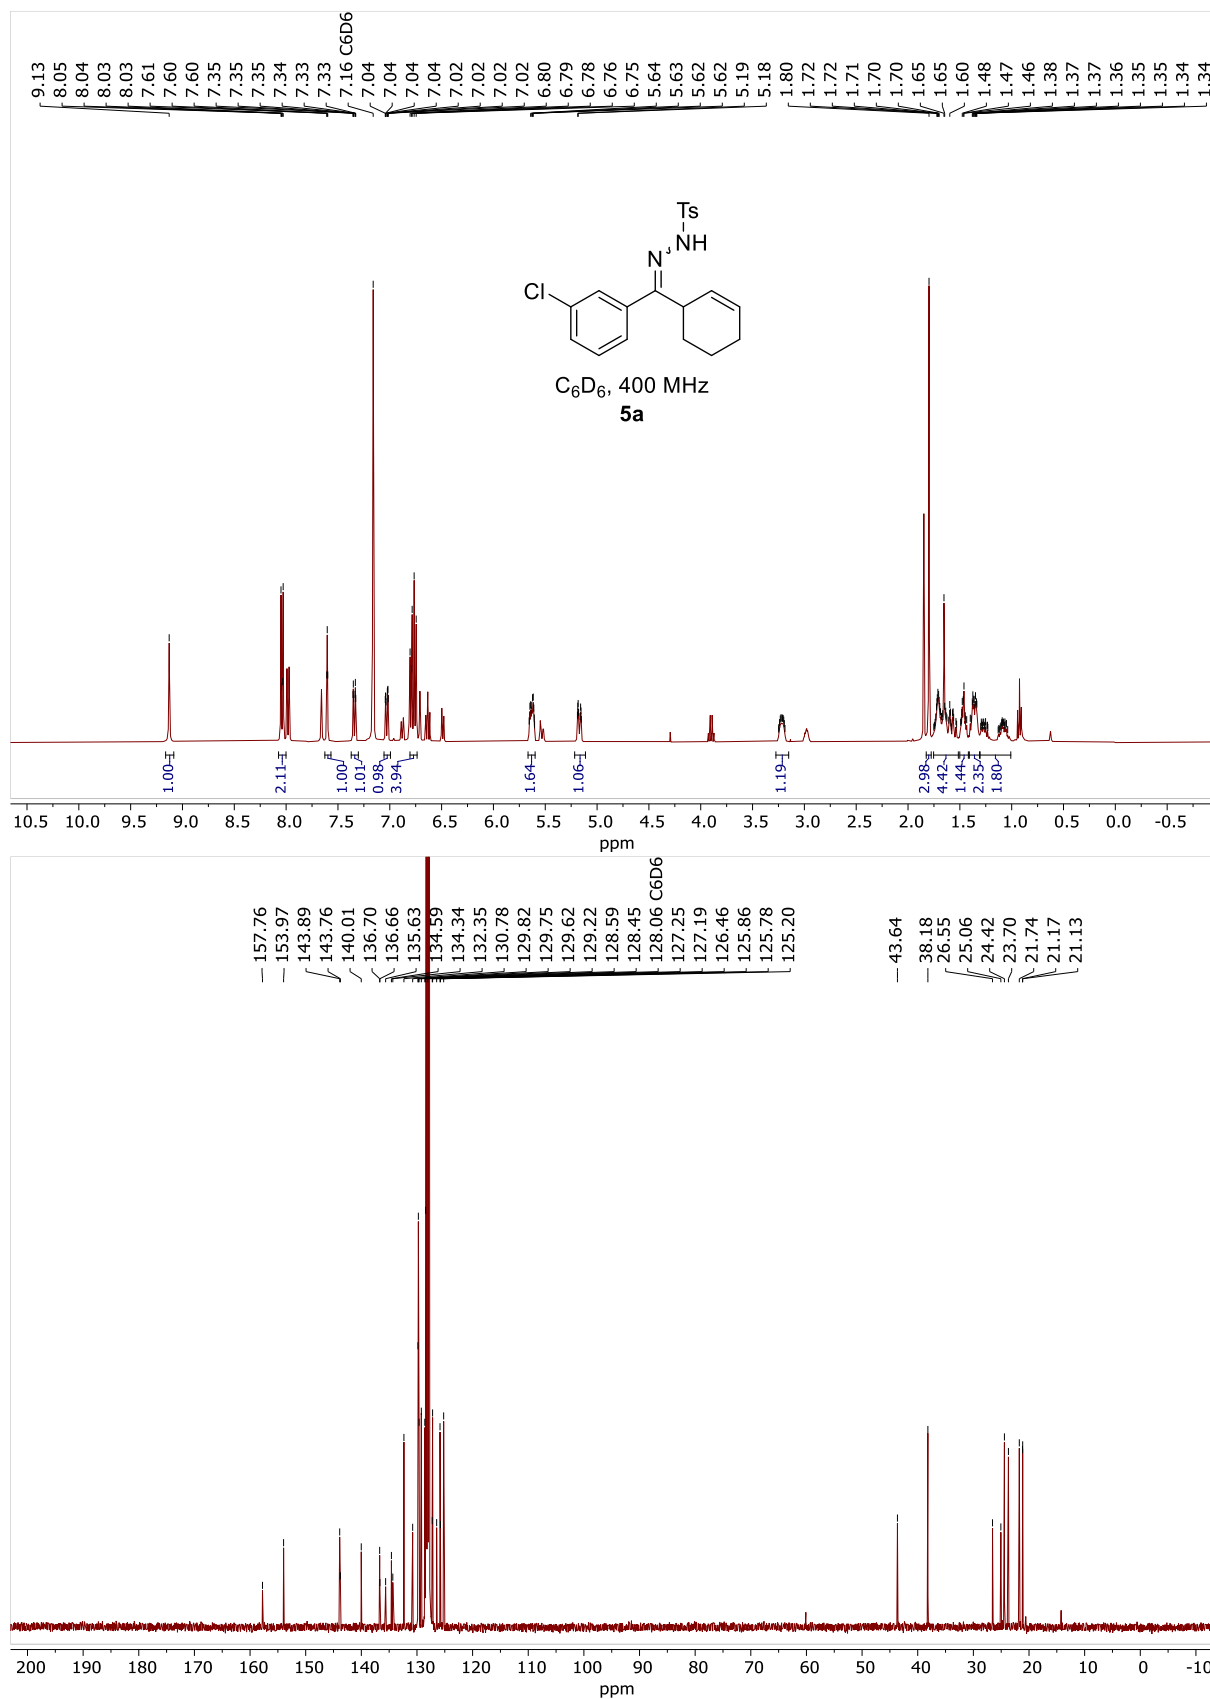

$^1\text{H}$  NMR and  $^{13}\text{C}$  NMR spectrum of compound **5b**

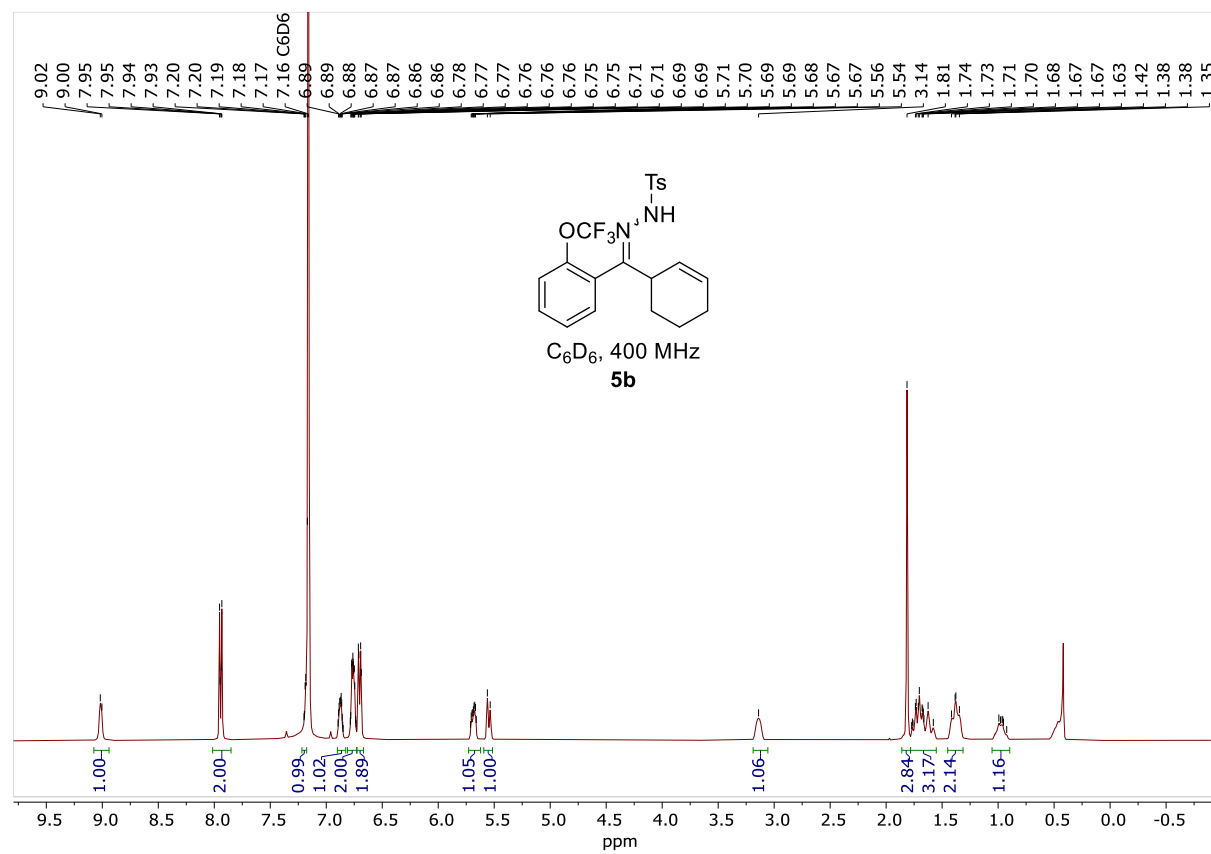

<sup>1</sup>H NMR and <sup>13</sup>C NMR spectrum of compound **5c**

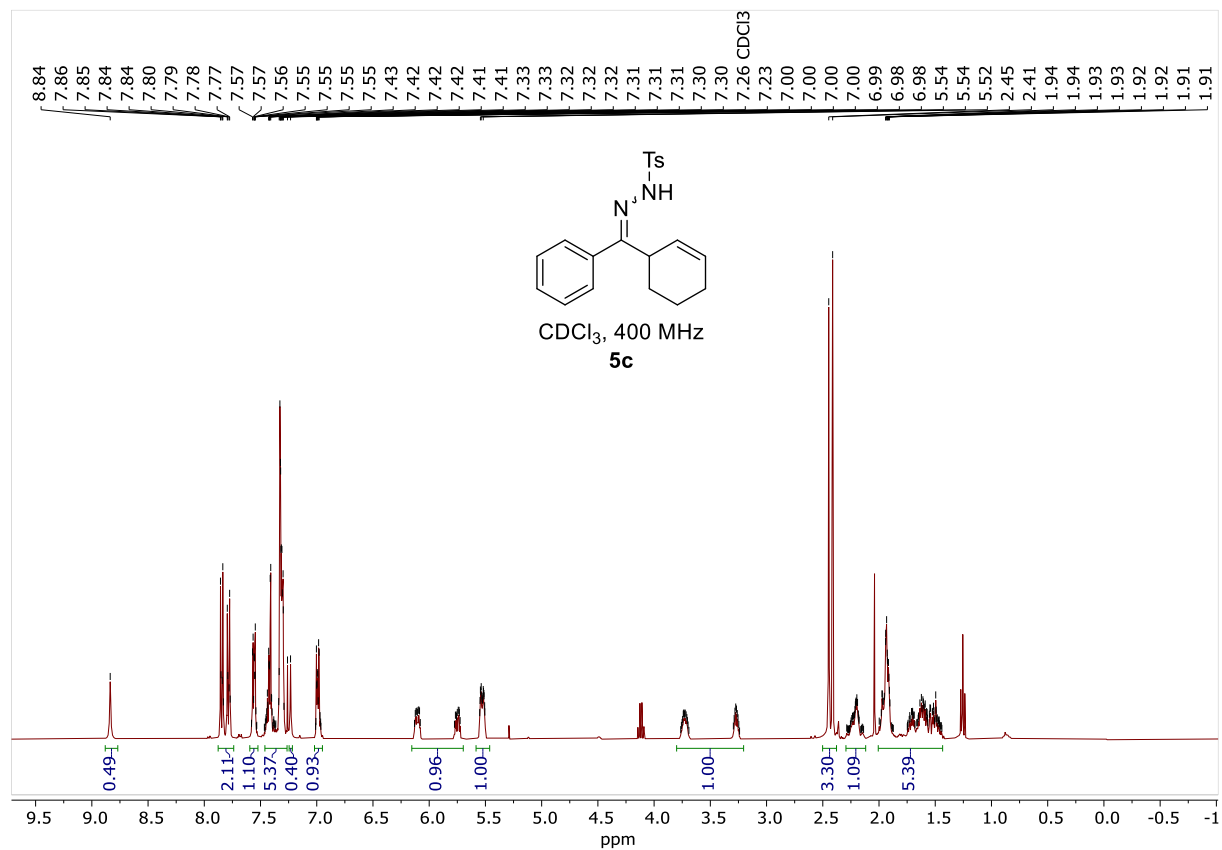

$^1\text{H}$  NMR and  $^{13}\text{C}$  NMR spectrum of compound **7b**

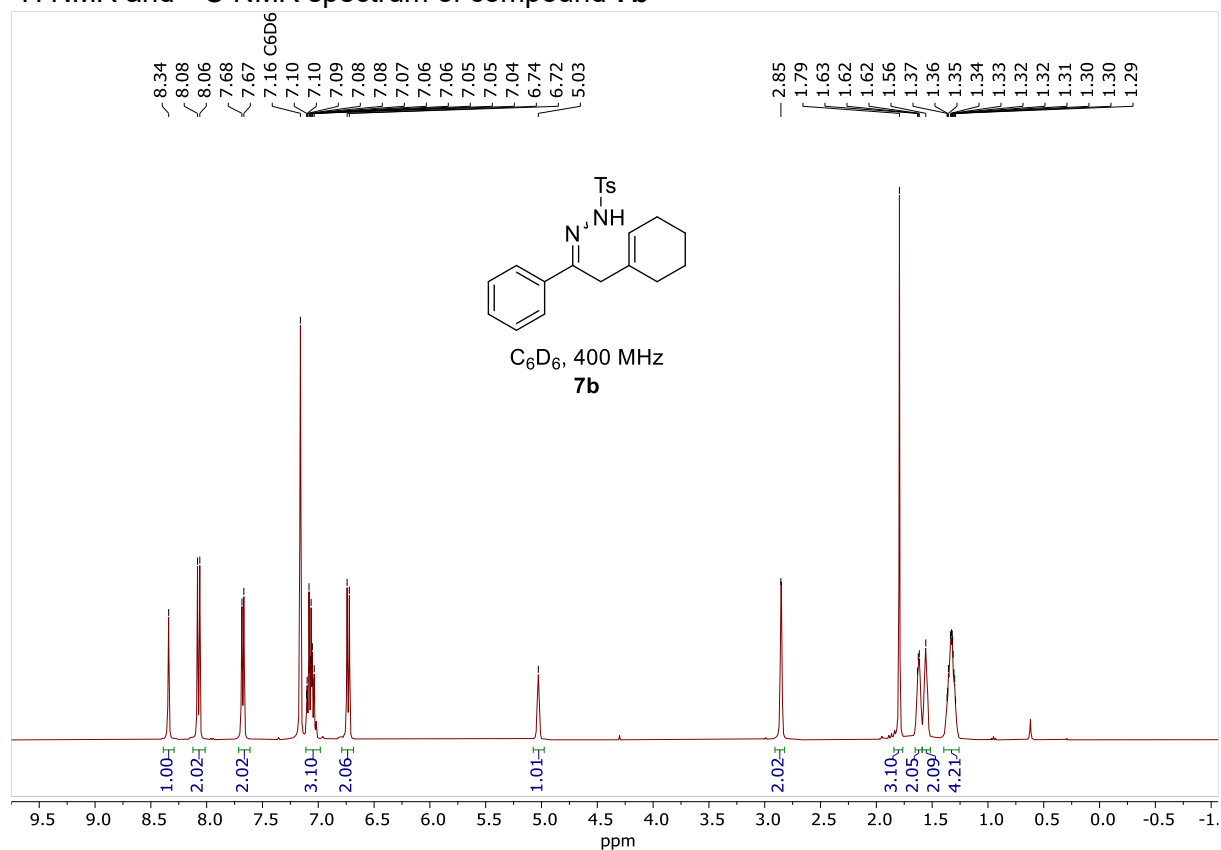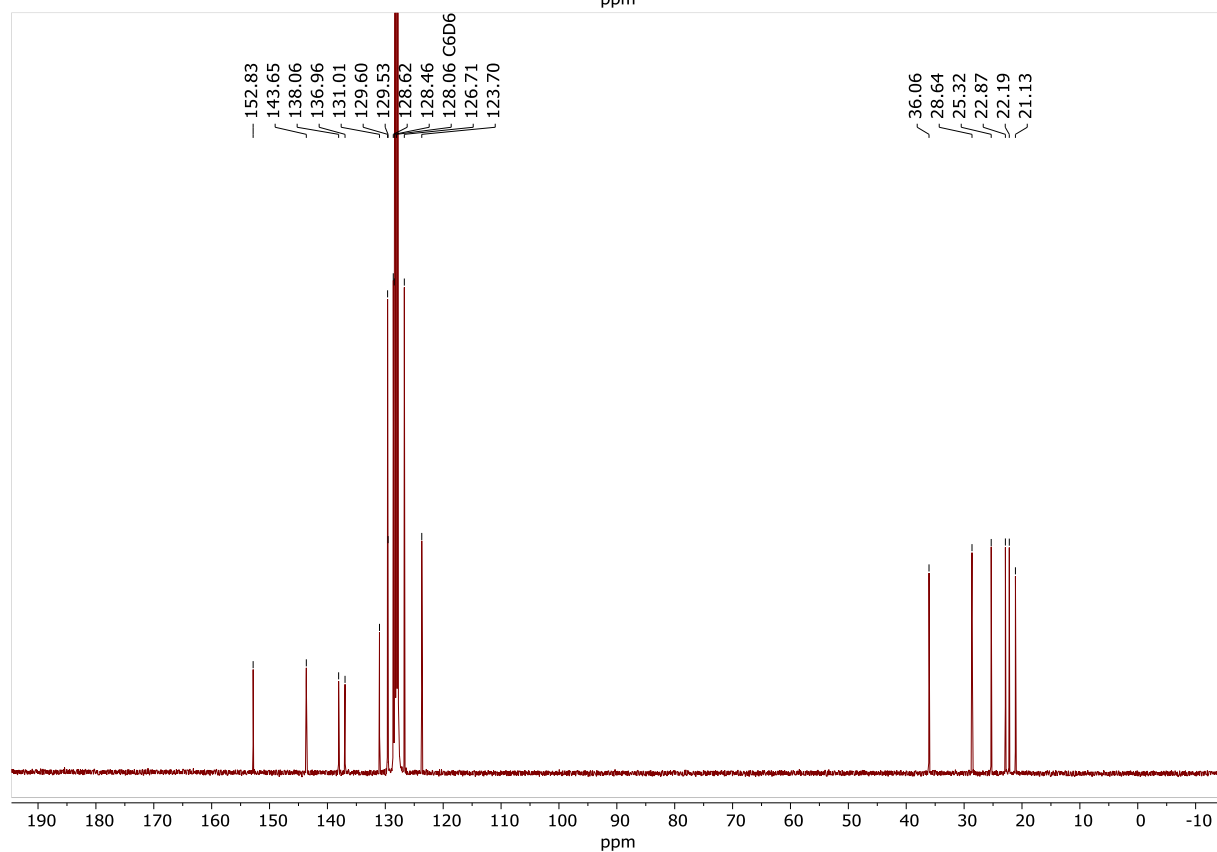

<sup>1</sup>H NMR and <sup>13</sup>C NMR spectrum of compound **2a**

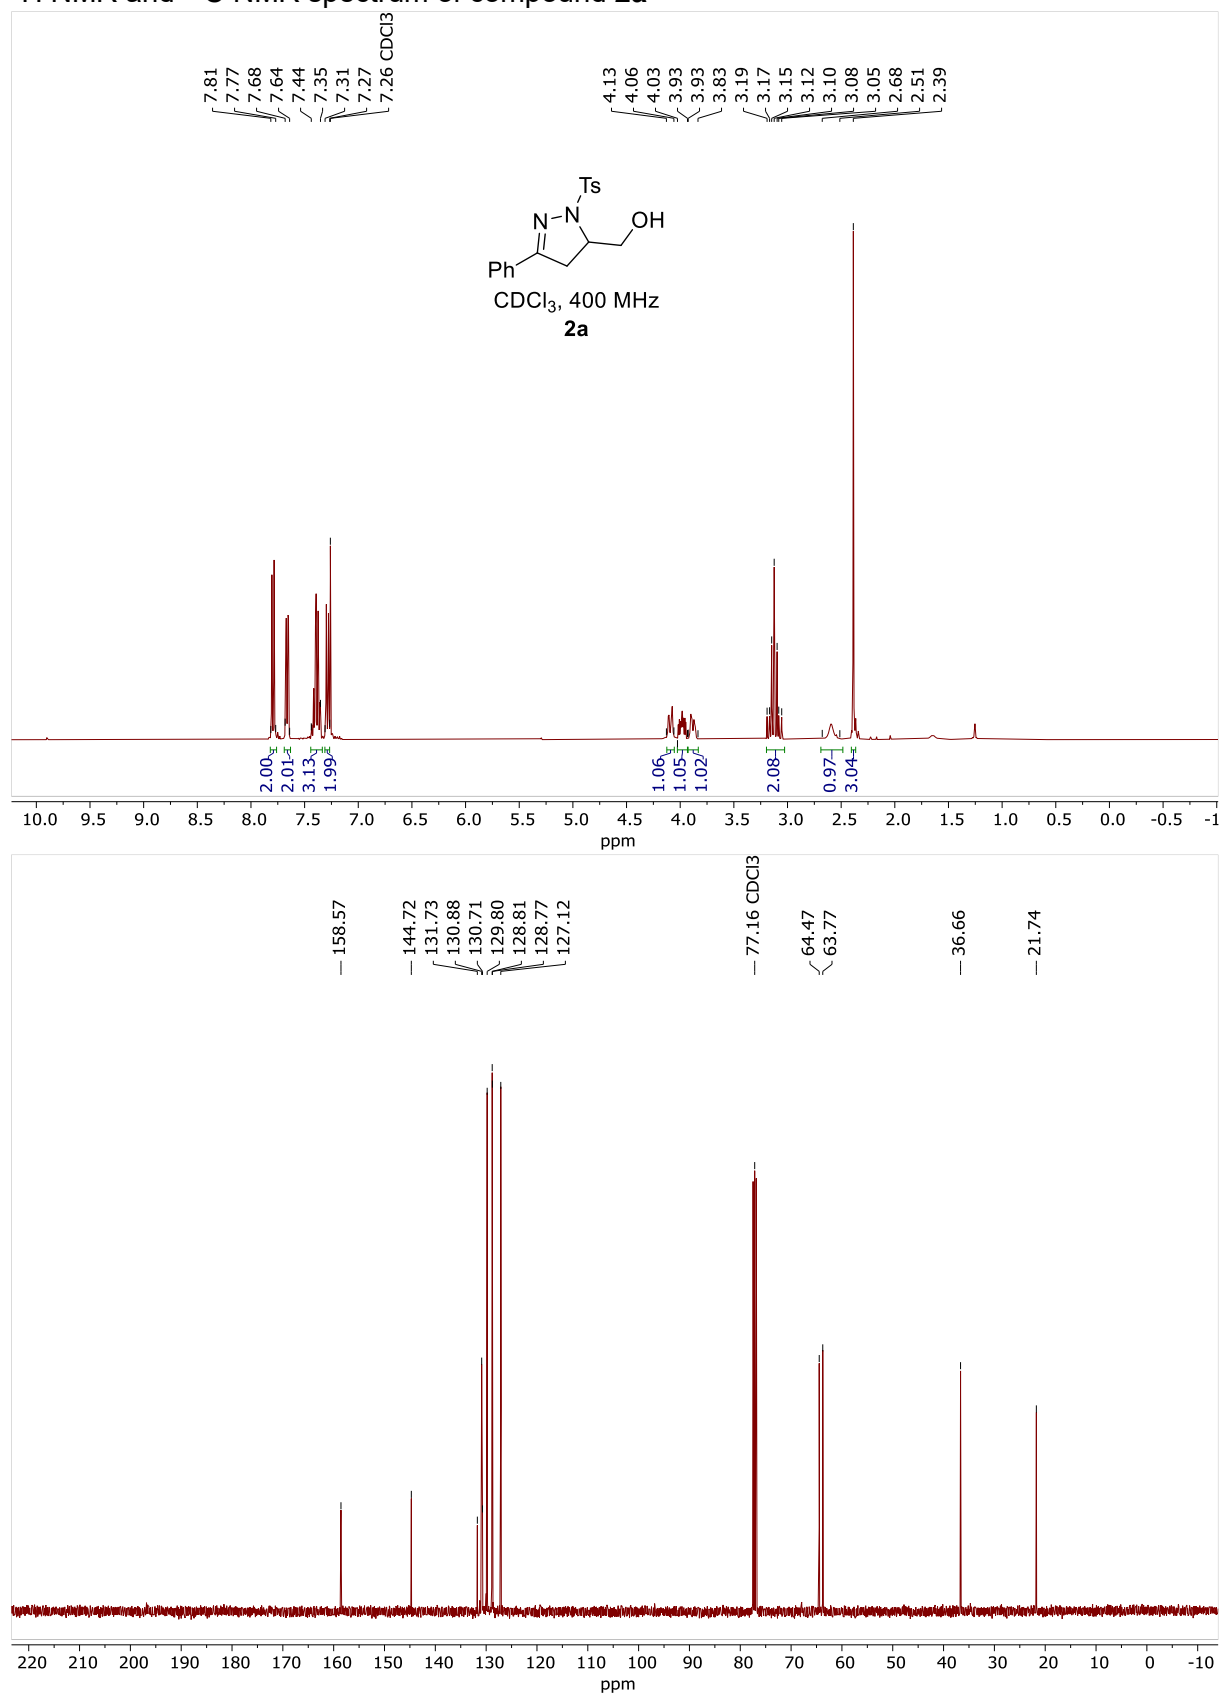

<sup>1</sup>H NMR and <sup>13</sup>C NMR spectrum of compound **2b**

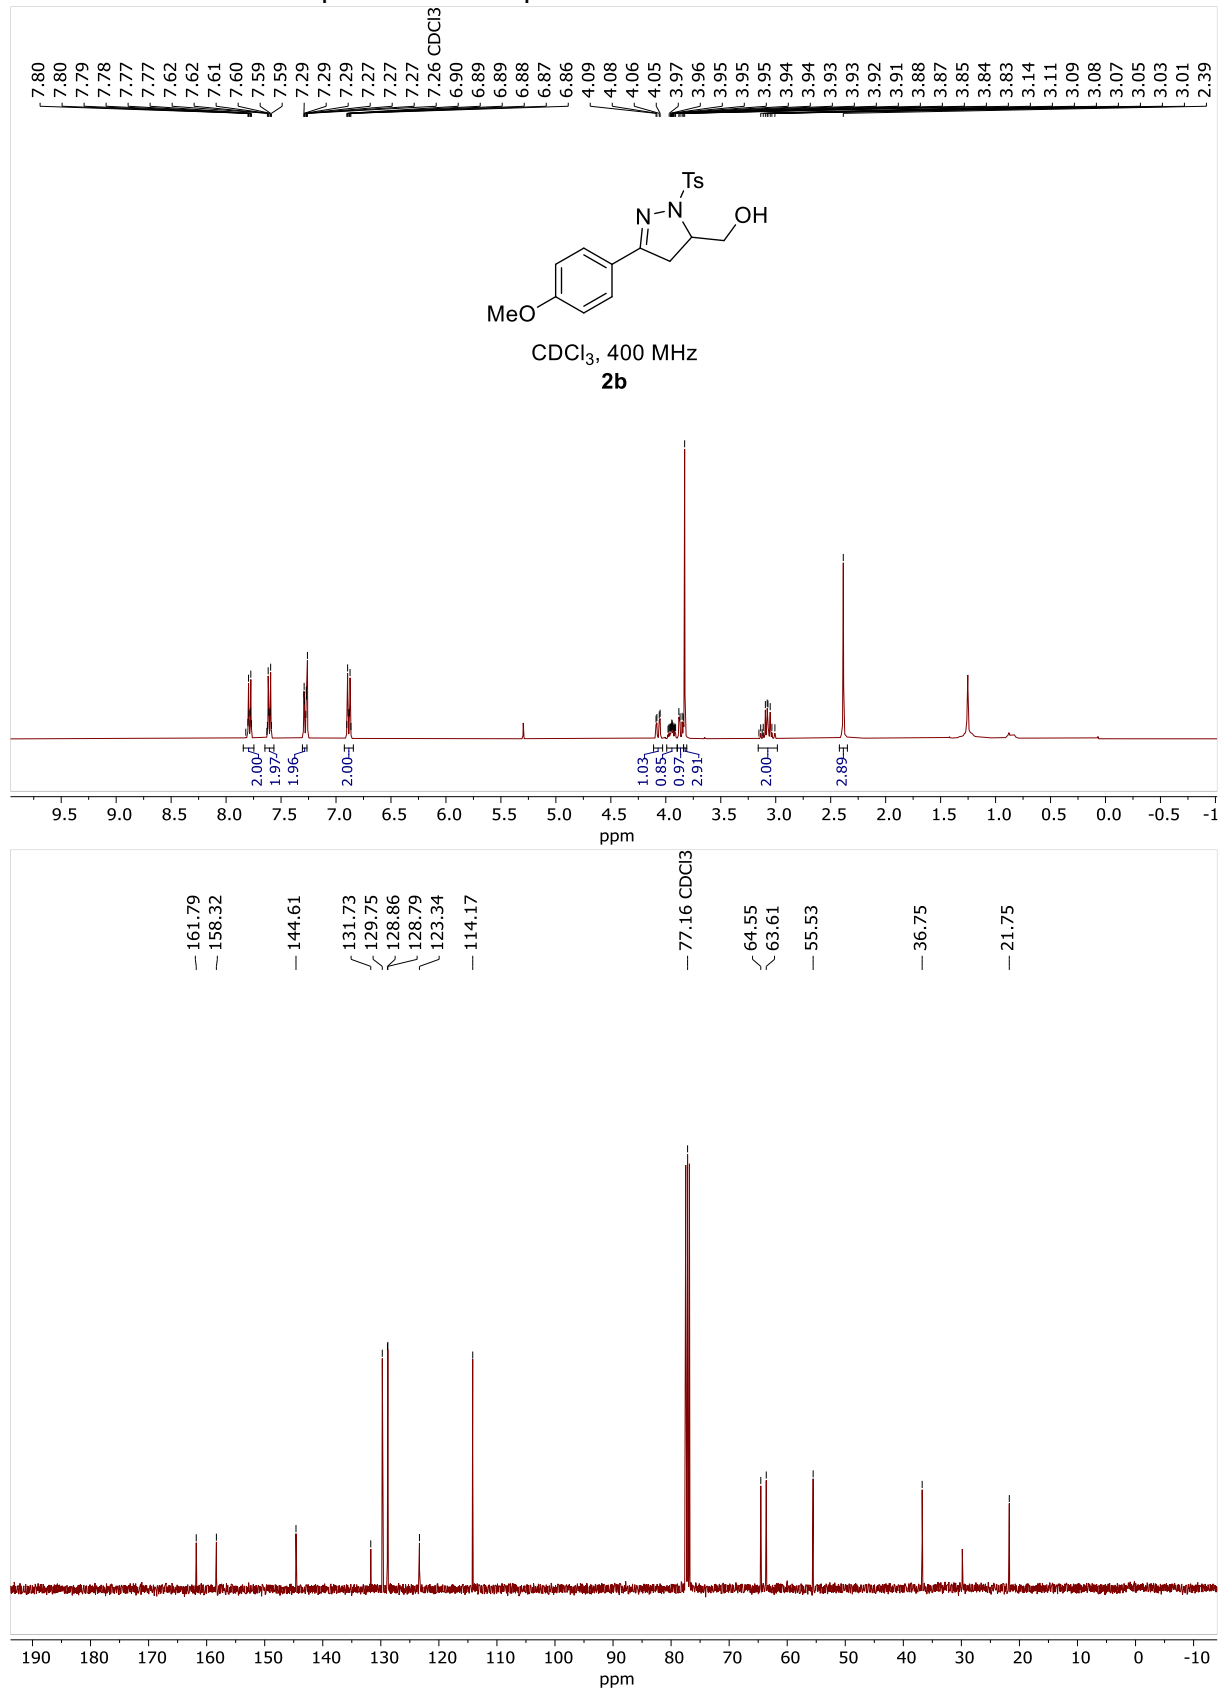

<sup>1</sup>H NMR and <sup>13</sup>C NMR spectrum of compound **2c**

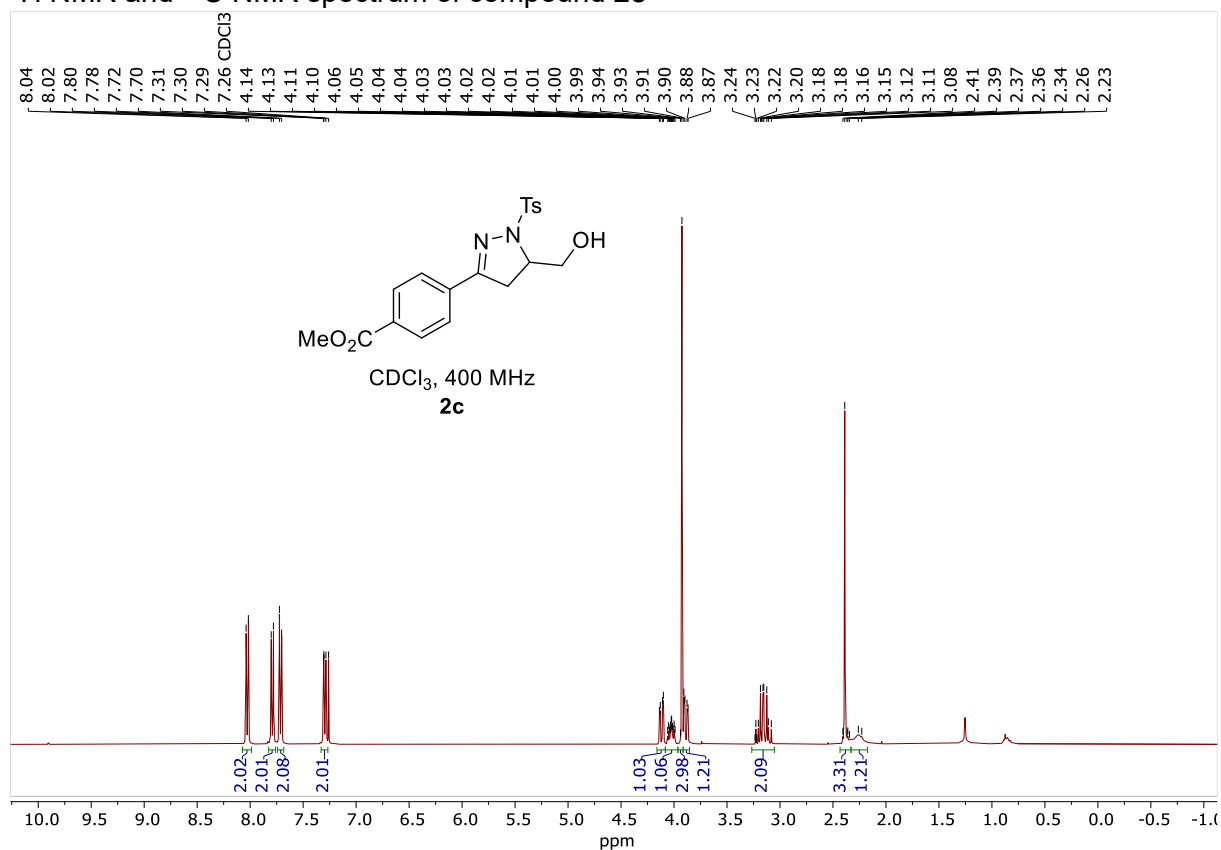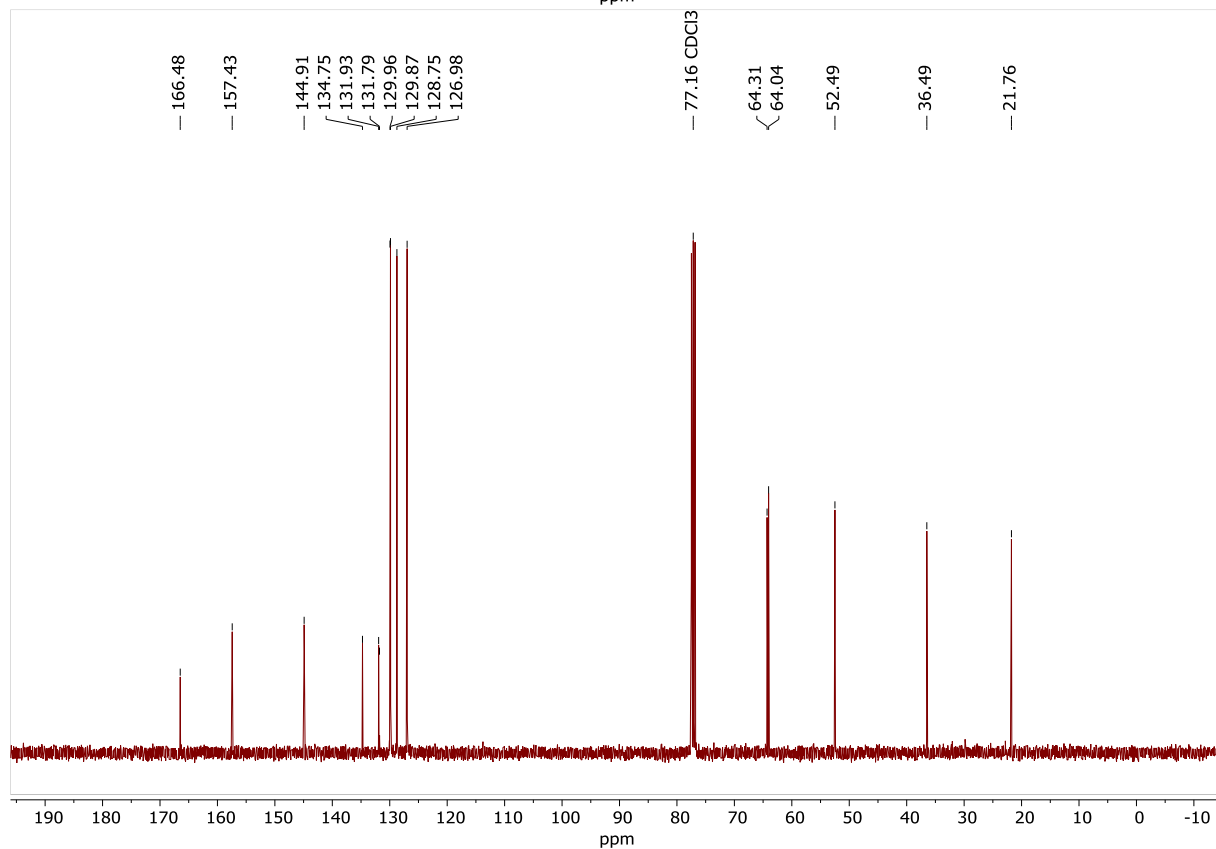



# <sup>1</sup>H NMR and <sup>13</sup>C NMR spectrum of compound **2d**

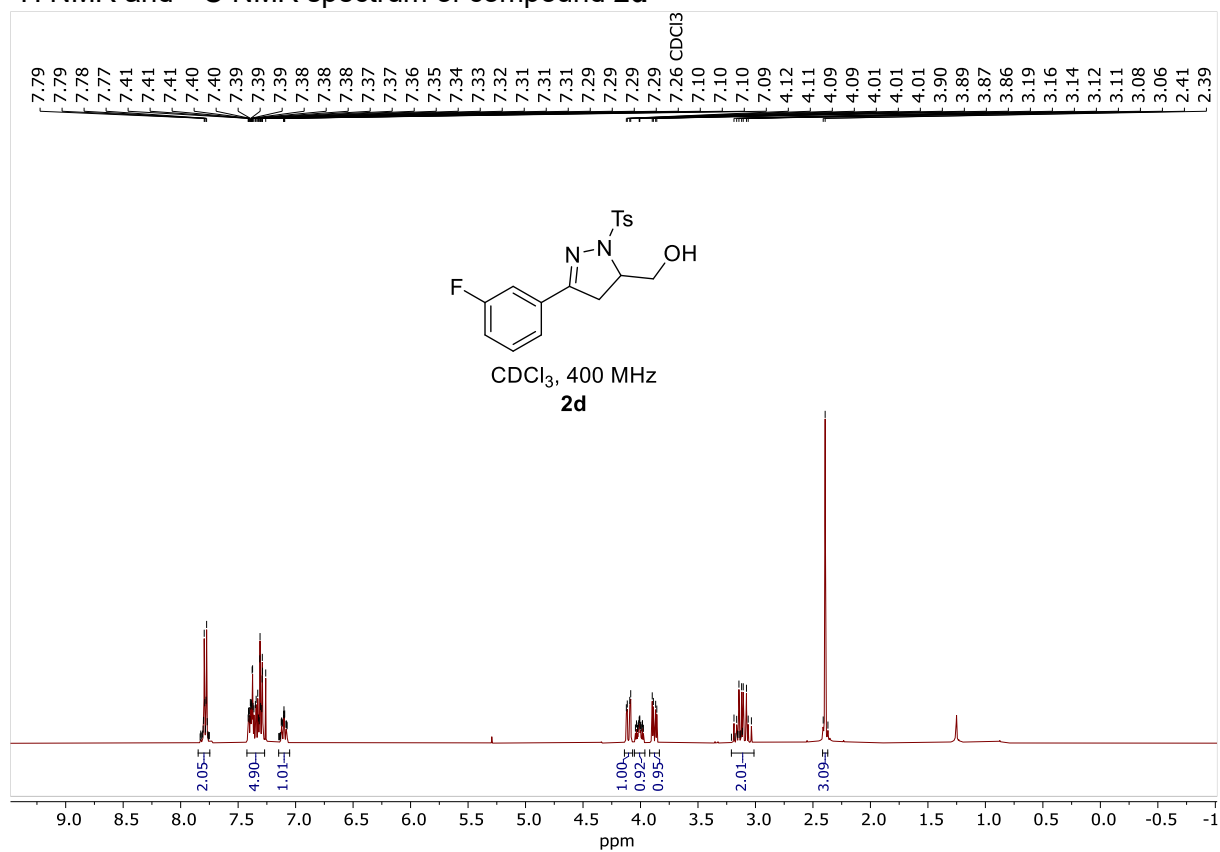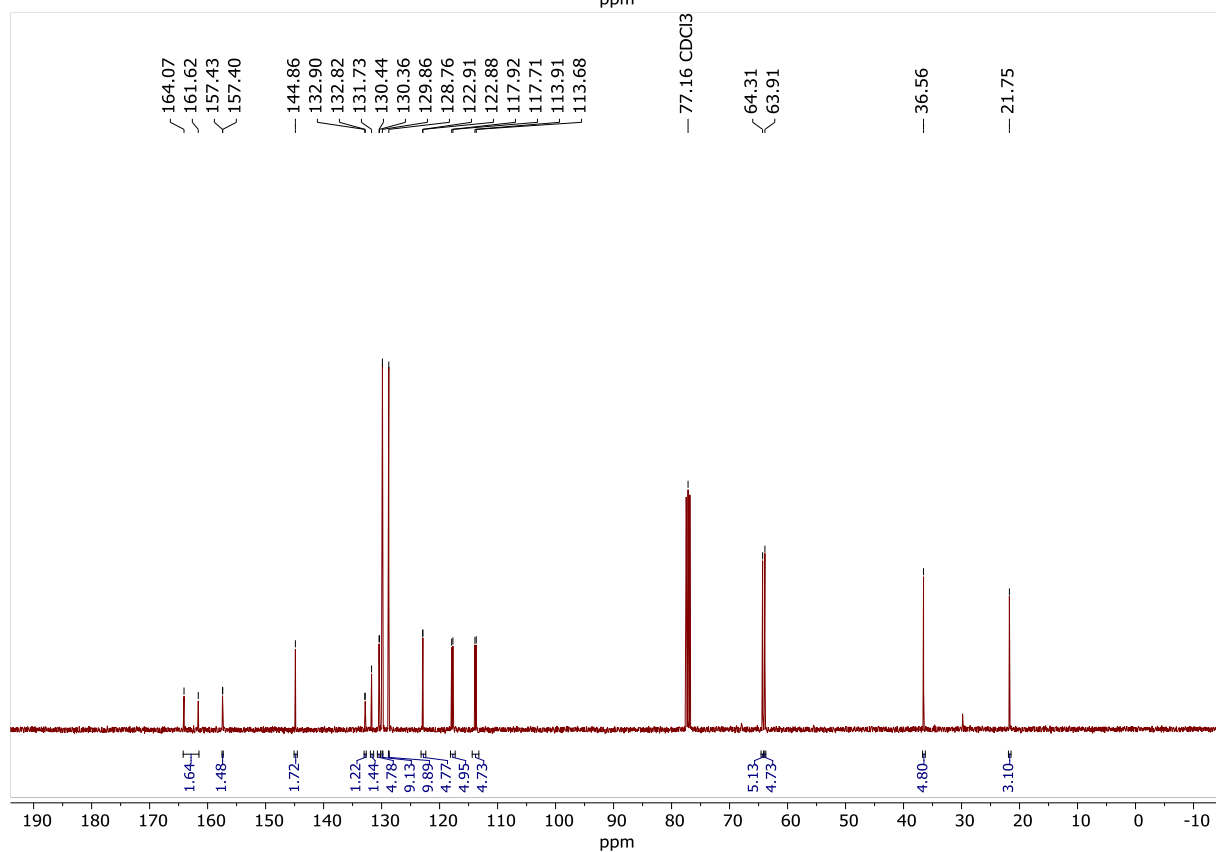

<sup>1</sup>H NMR and <sup>13</sup>C NMR spectrum of compound **2e**

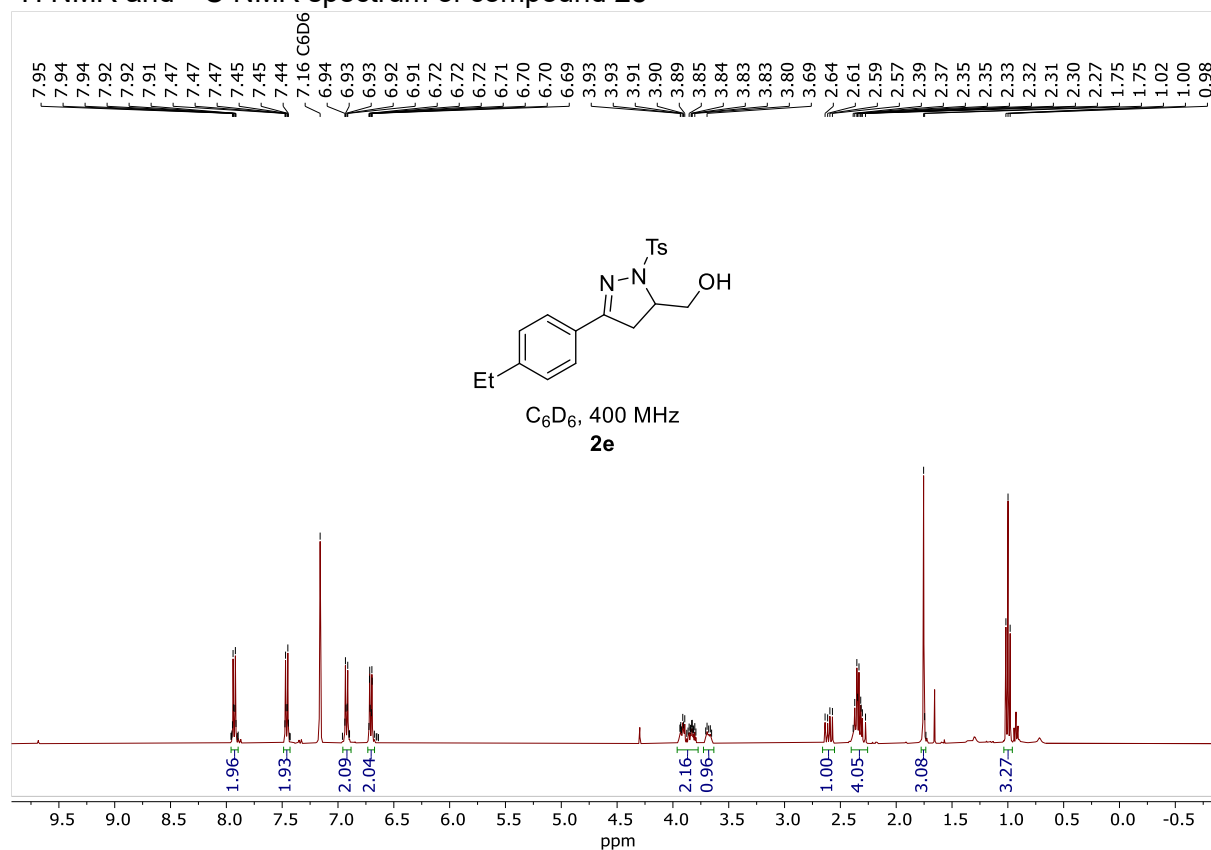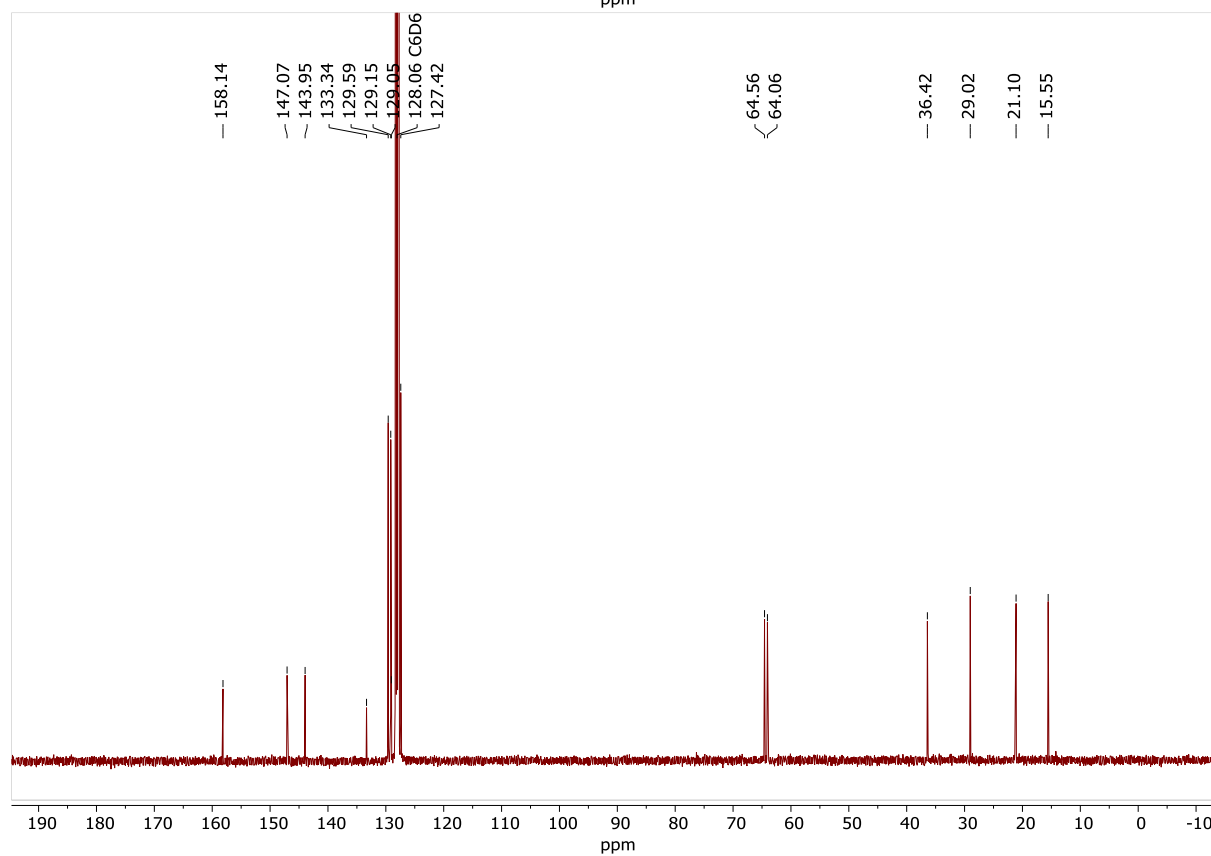

<sup>1</sup>H NMR and <sup>13</sup>C NMR spectrum of compound **2f**

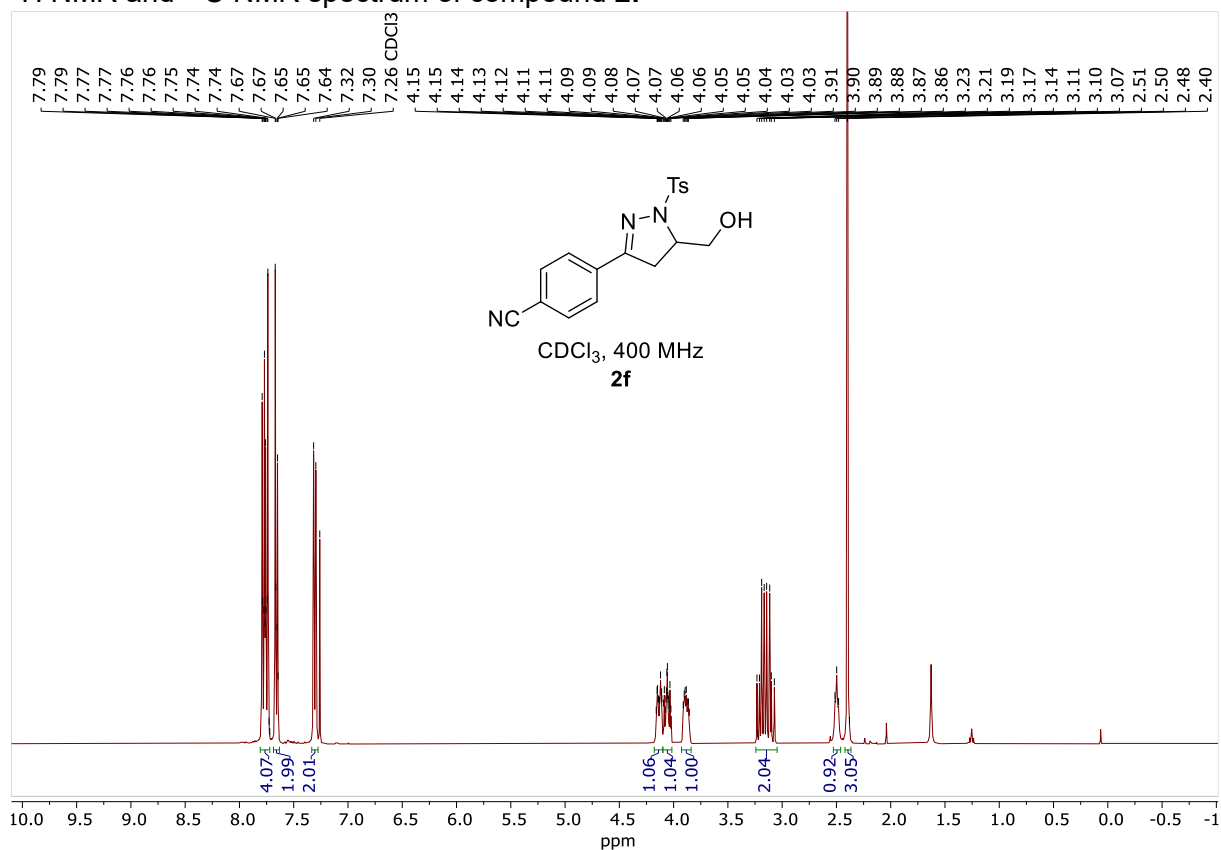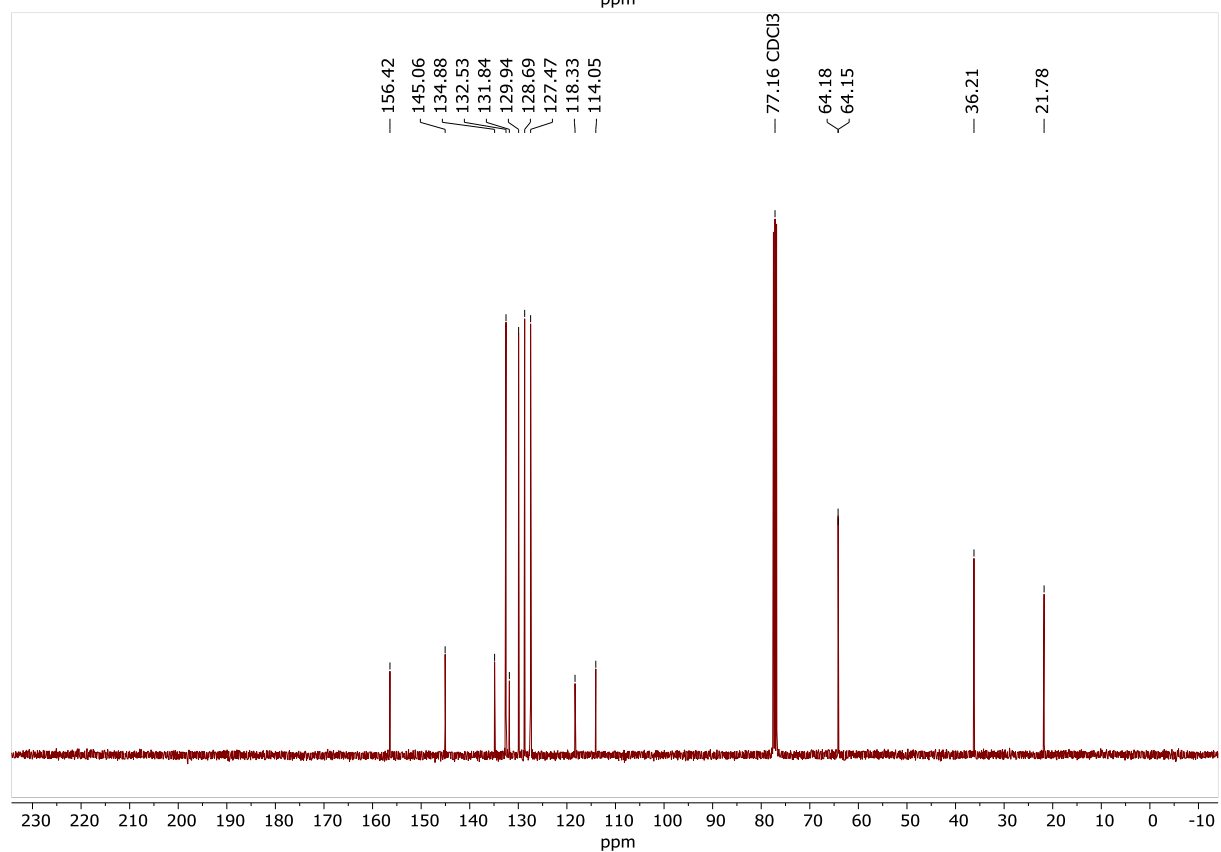

<sup>1</sup>H NMR and <sup>13</sup>C NMR spectrum of compound **2g**

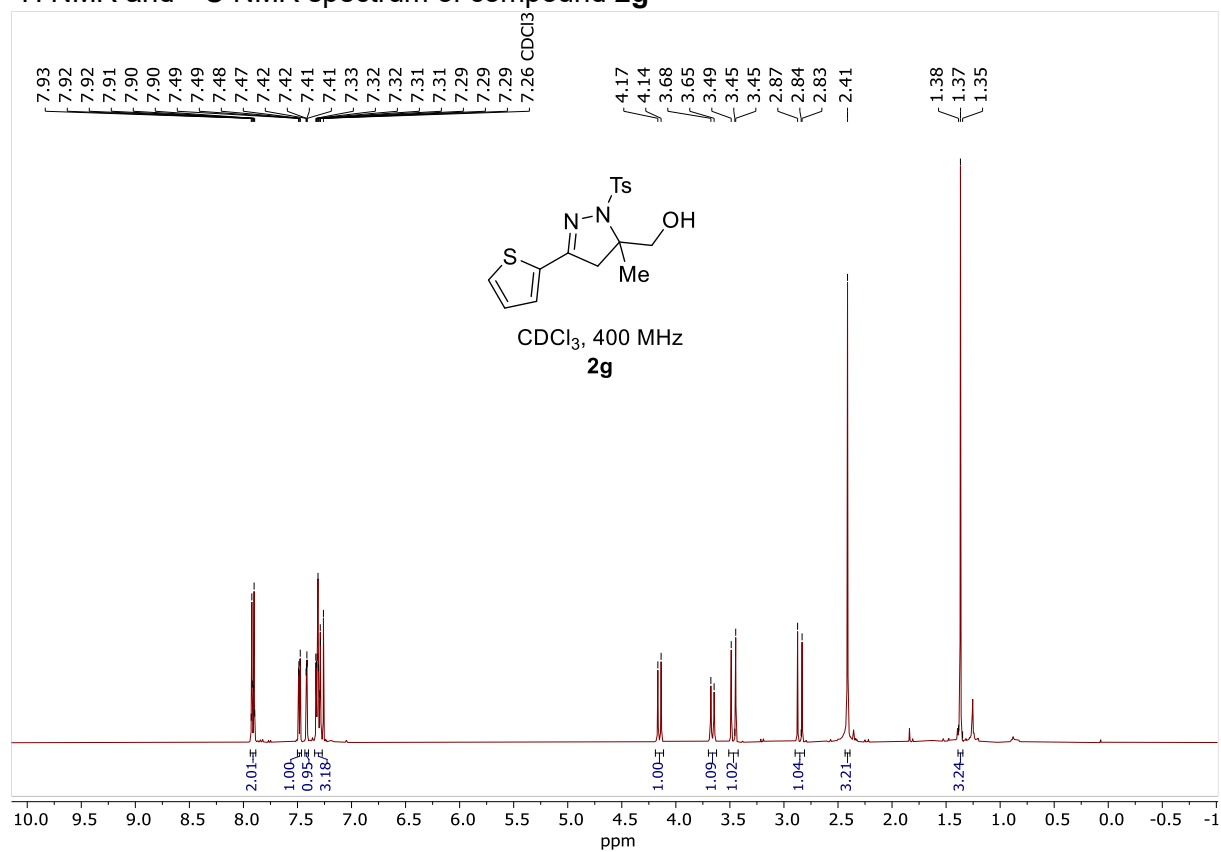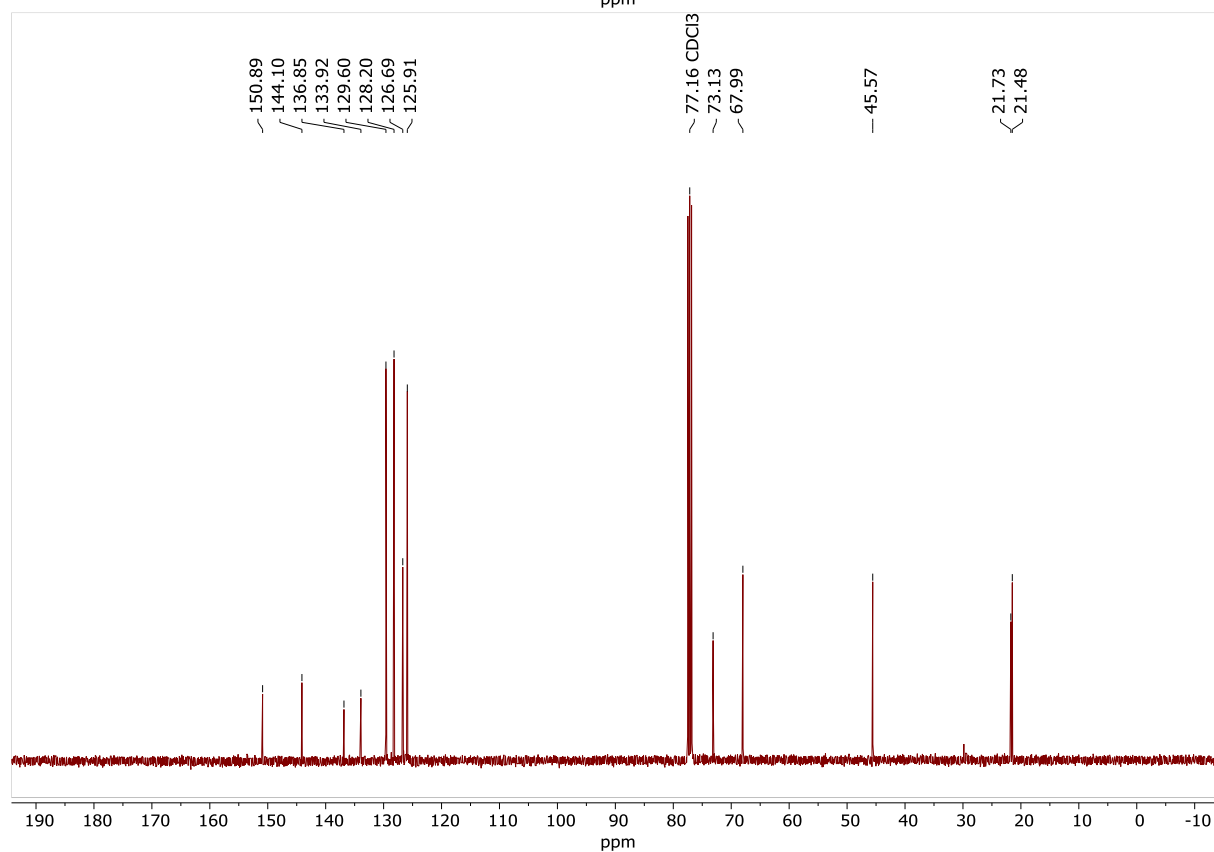

<sup>1</sup>H NMR and <sup>13</sup>C NMR spectrum of compound **2h**

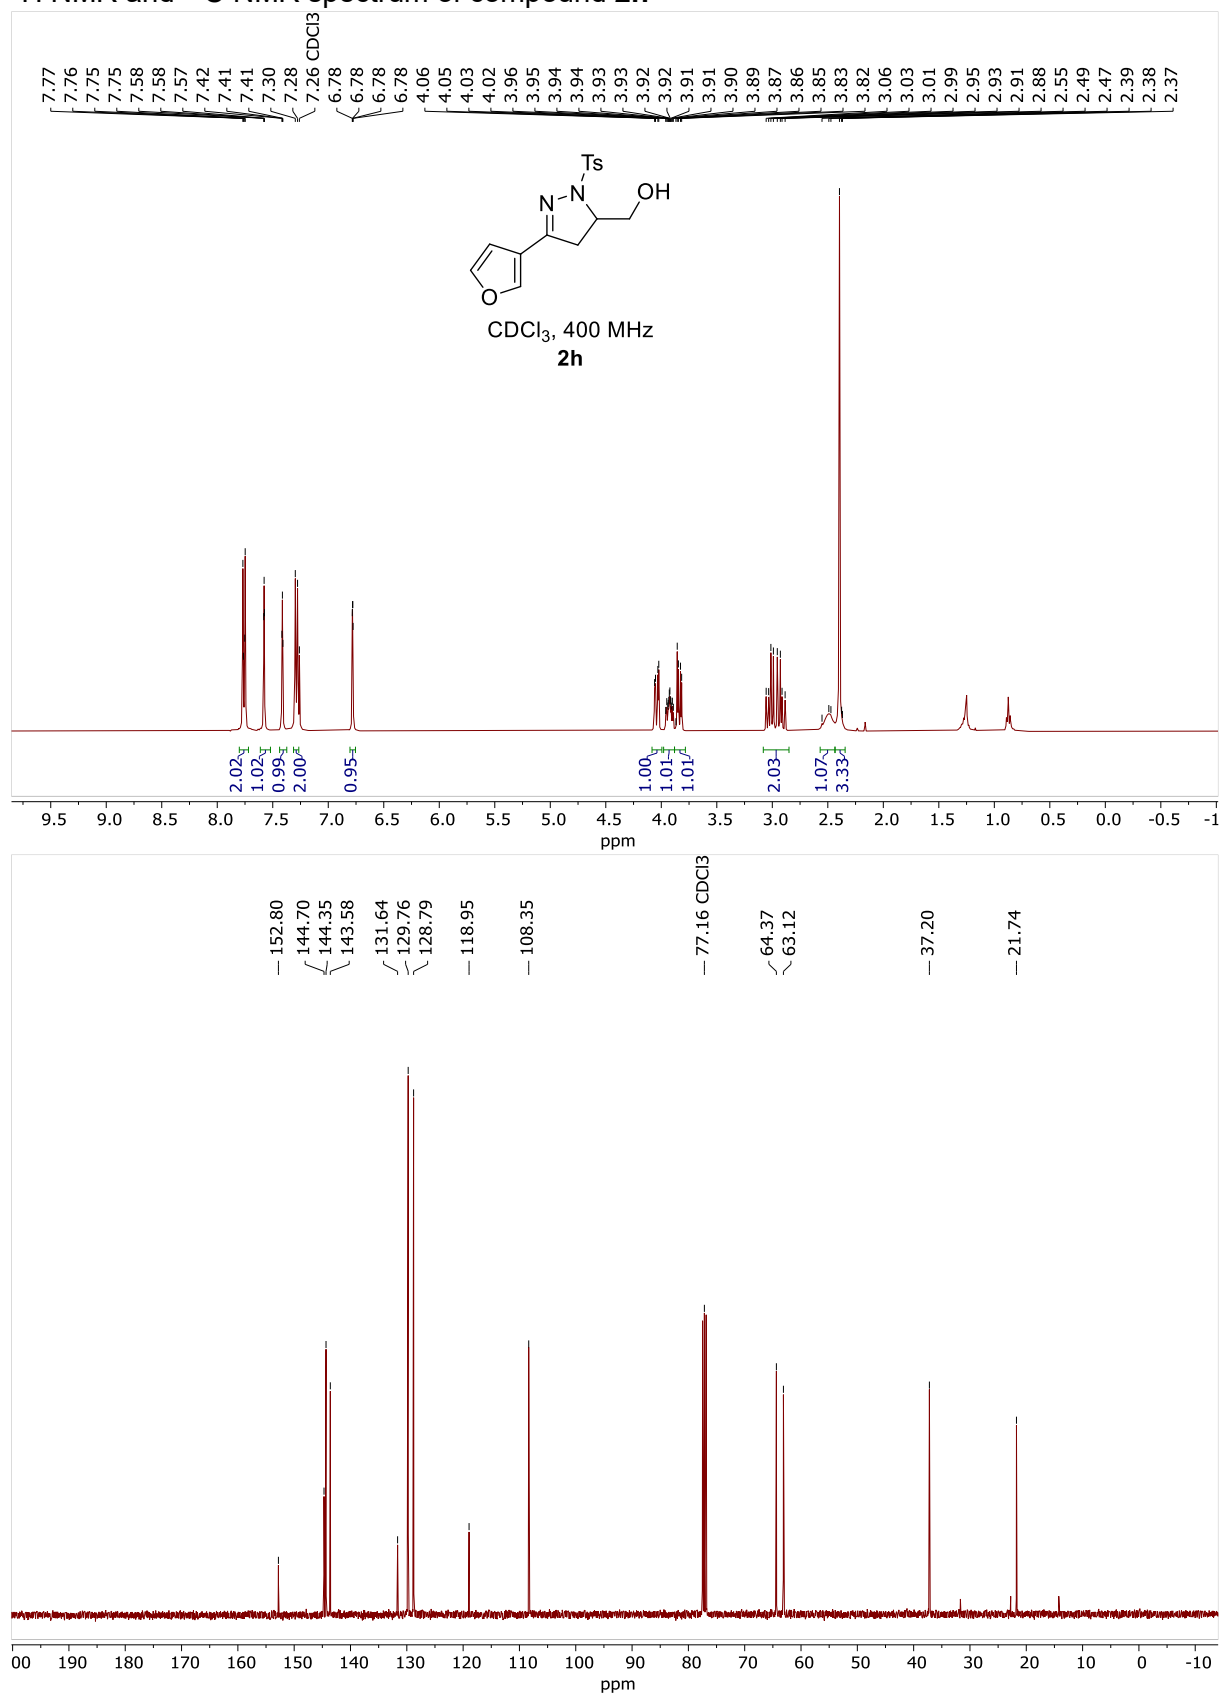

<sup>1</sup>H NMR and <sup>13</sup>C NMR spectrum of compound **2i**

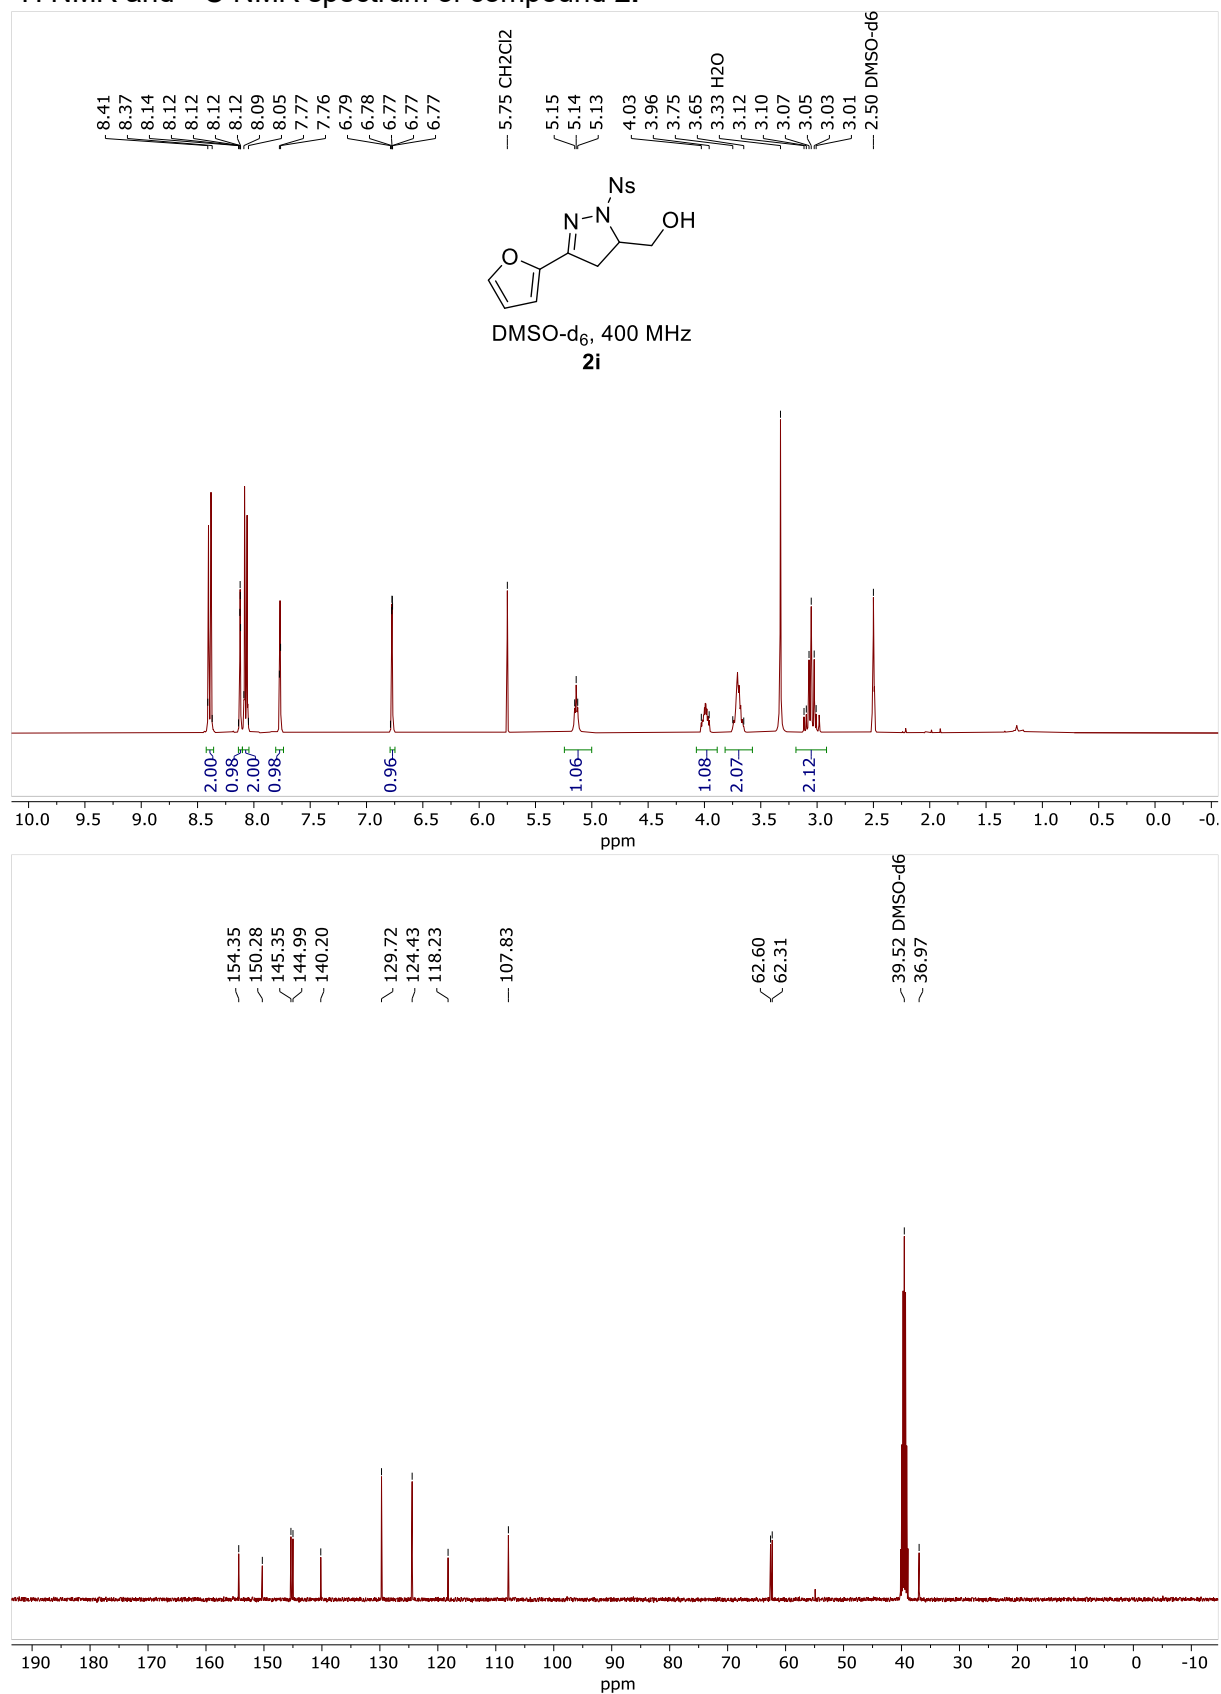



<sup>1</sup>H NMR and <sup>13</sup>C NMR spectrum of compound **2k**

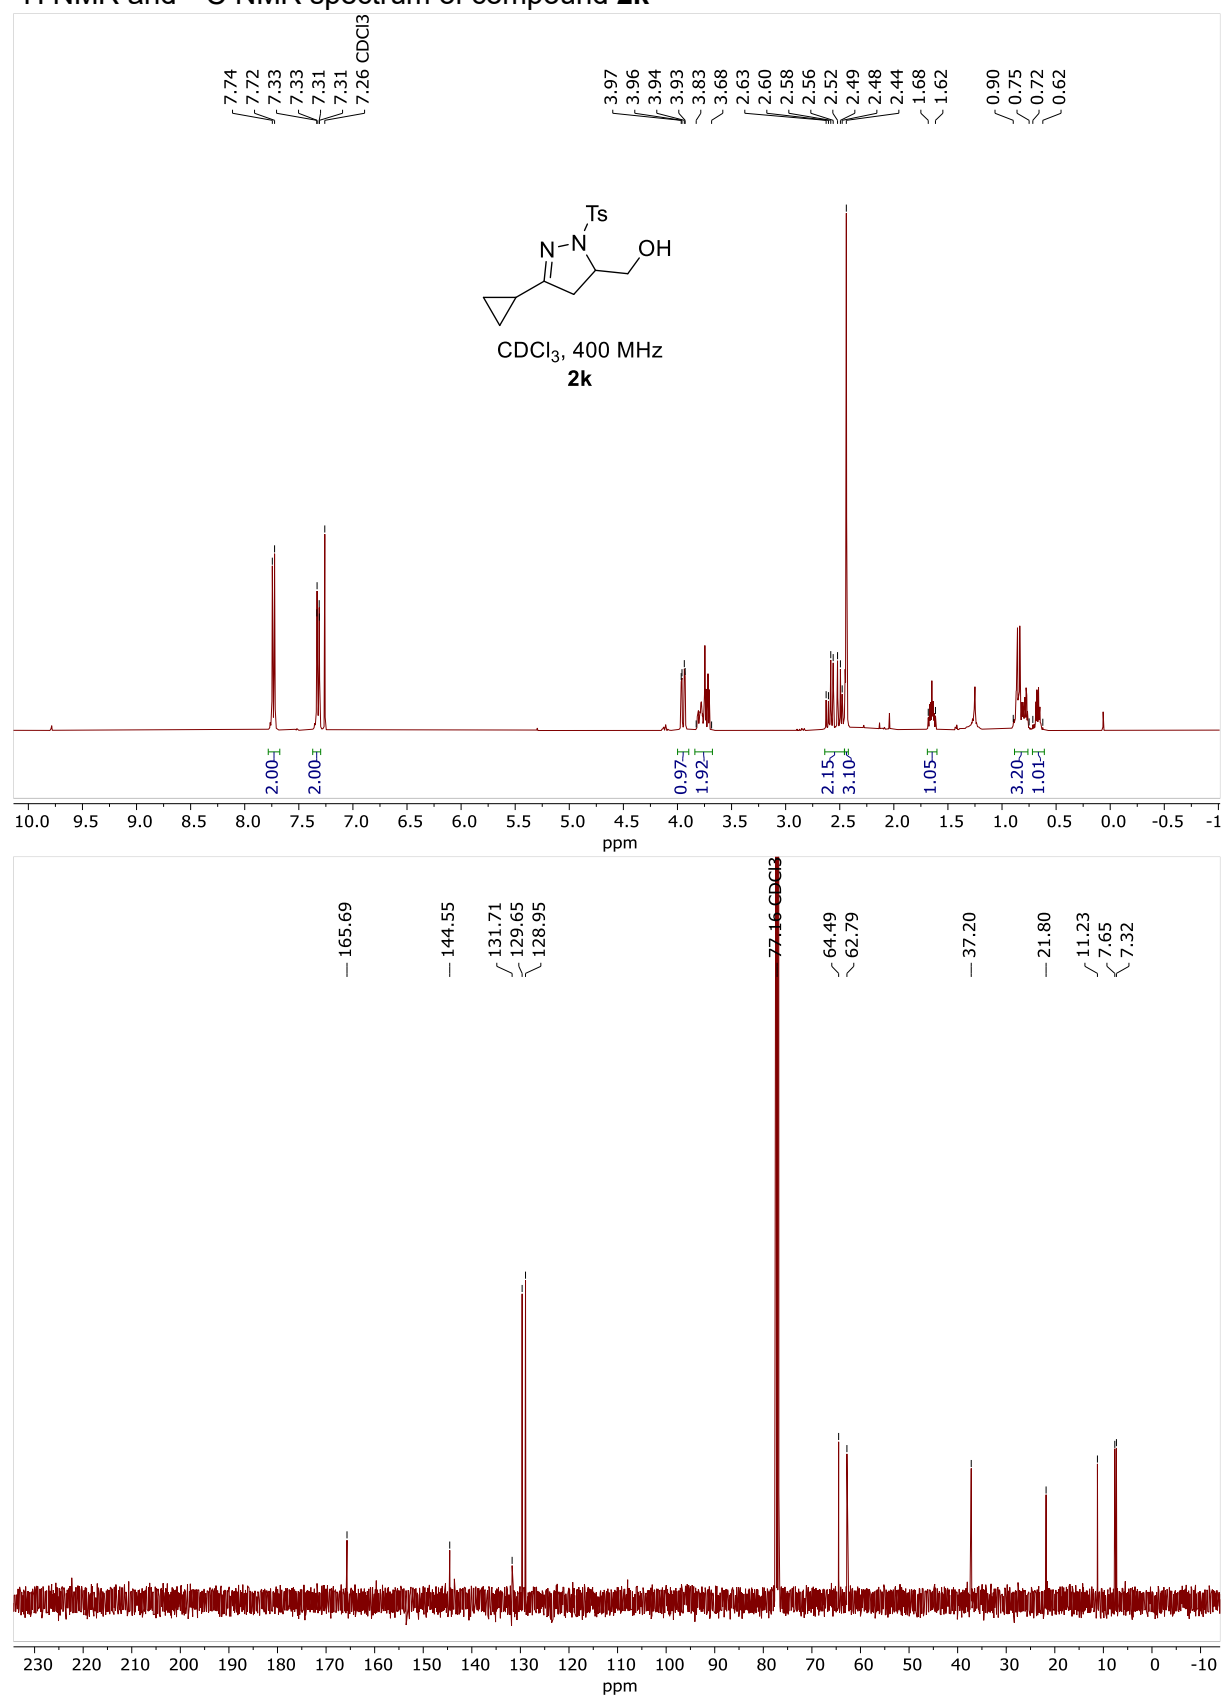



<sup>1</sup>H NMR and <sup>13</sup>C NMR spectrum of compound **2I**

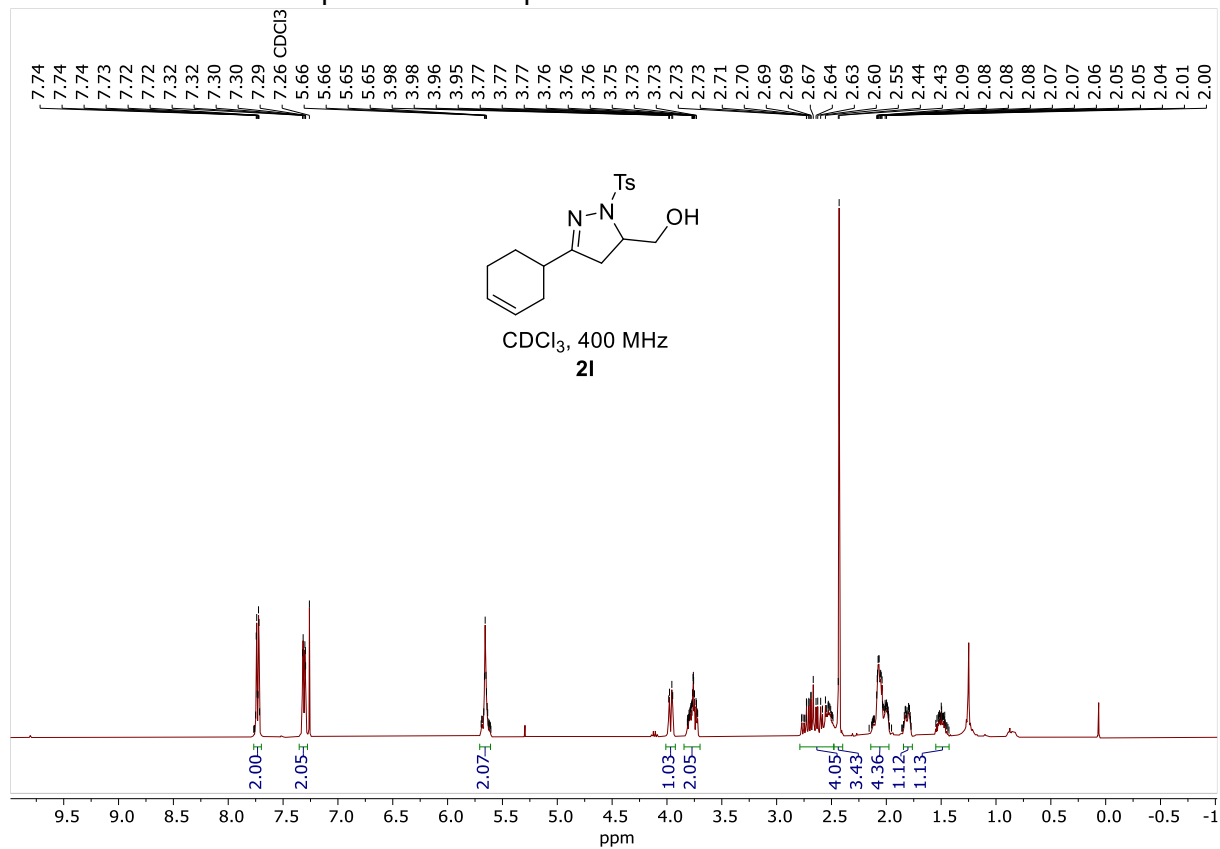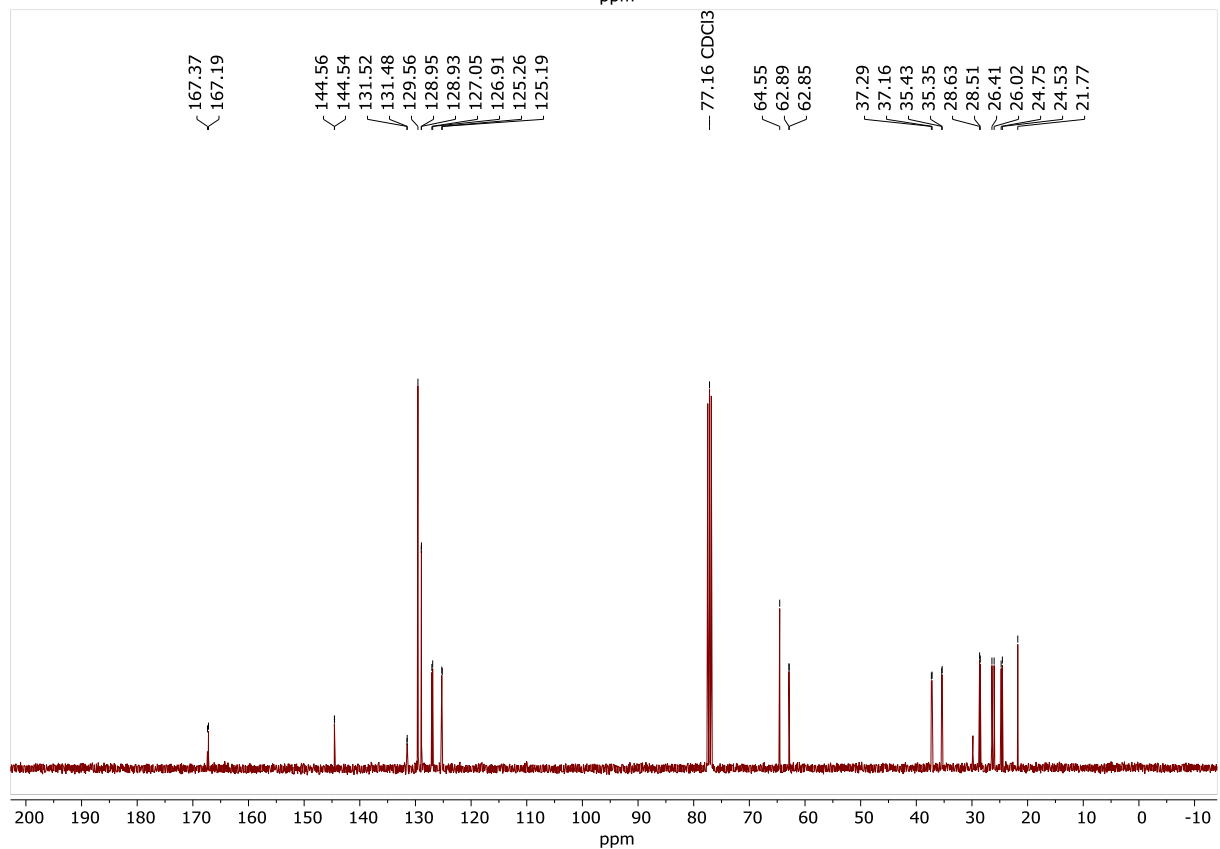

<sup>1</sup>H NMR and <sup>13</sup>C NMR spectrum of compound **2m**

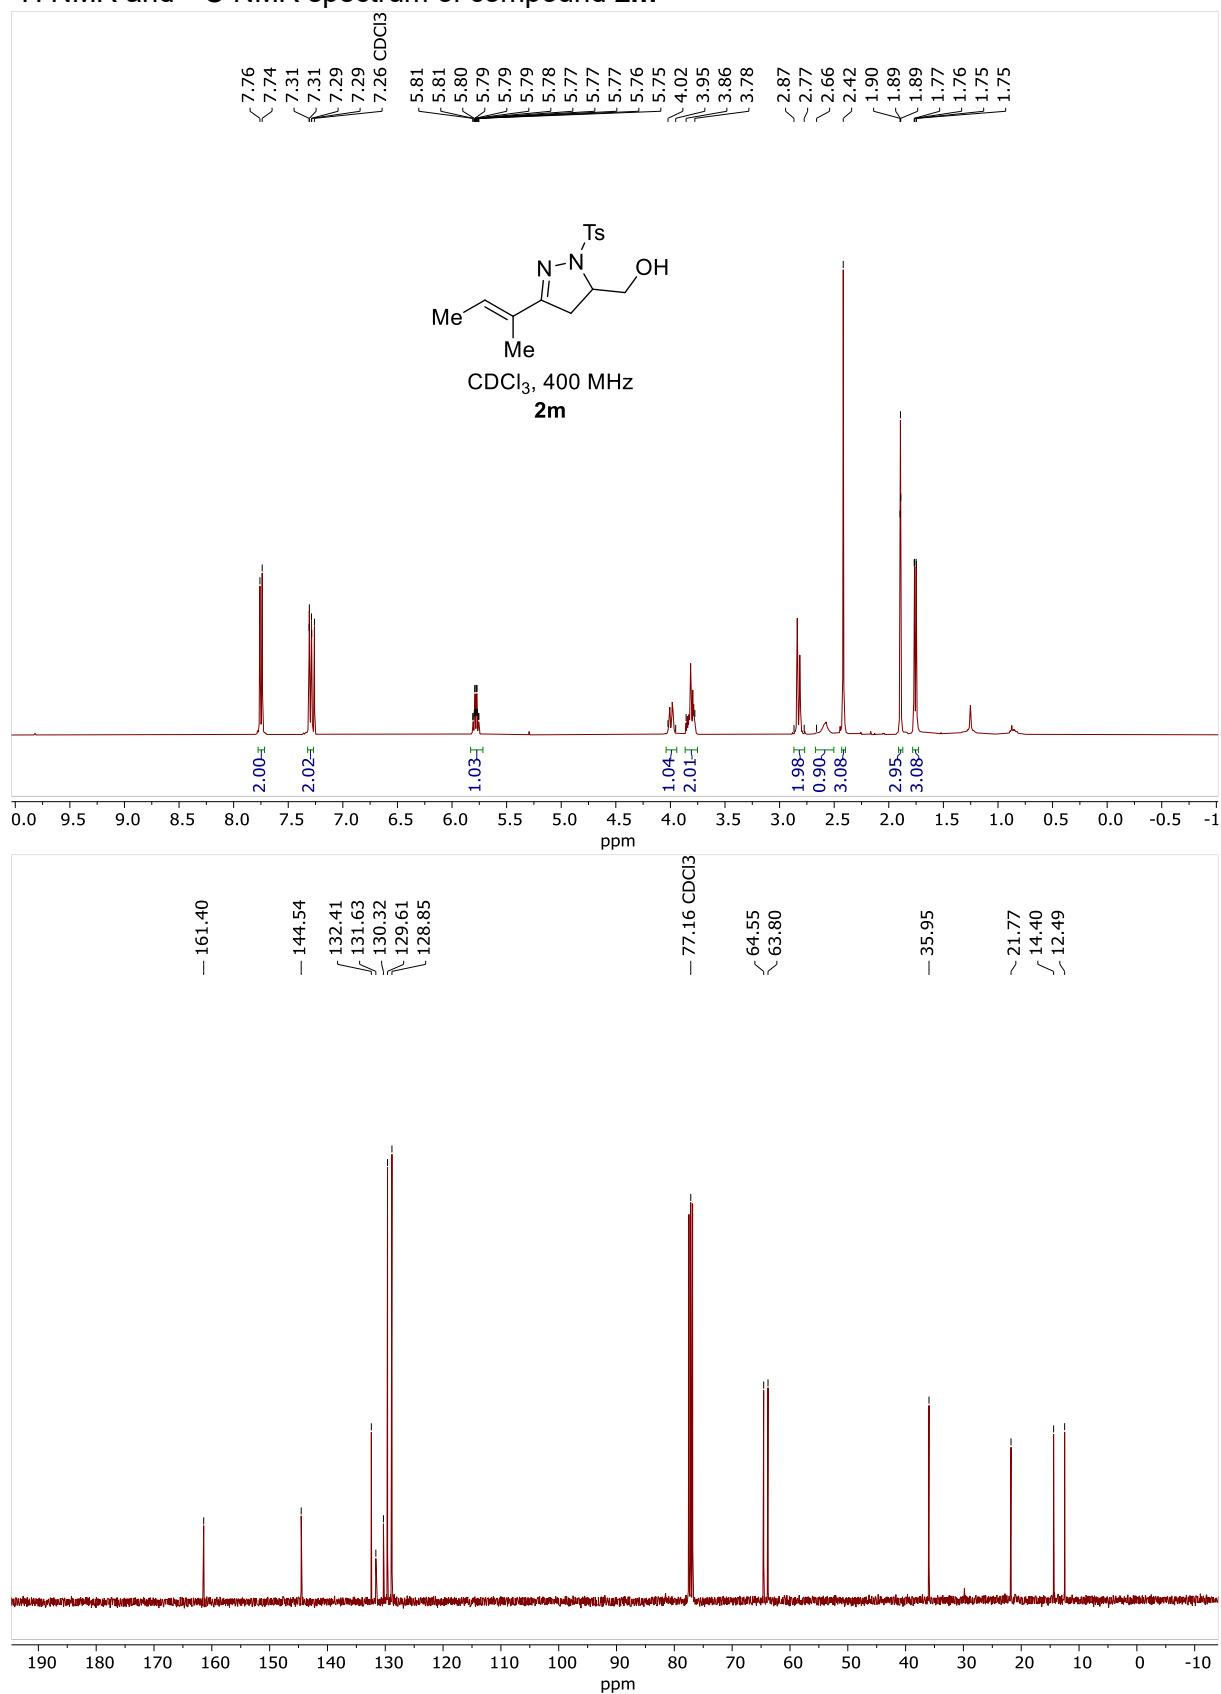

<sup>1</sup>H NMR and <sup>13</sup>C NMR spectrum of compound **2n** (minor diastereomer)

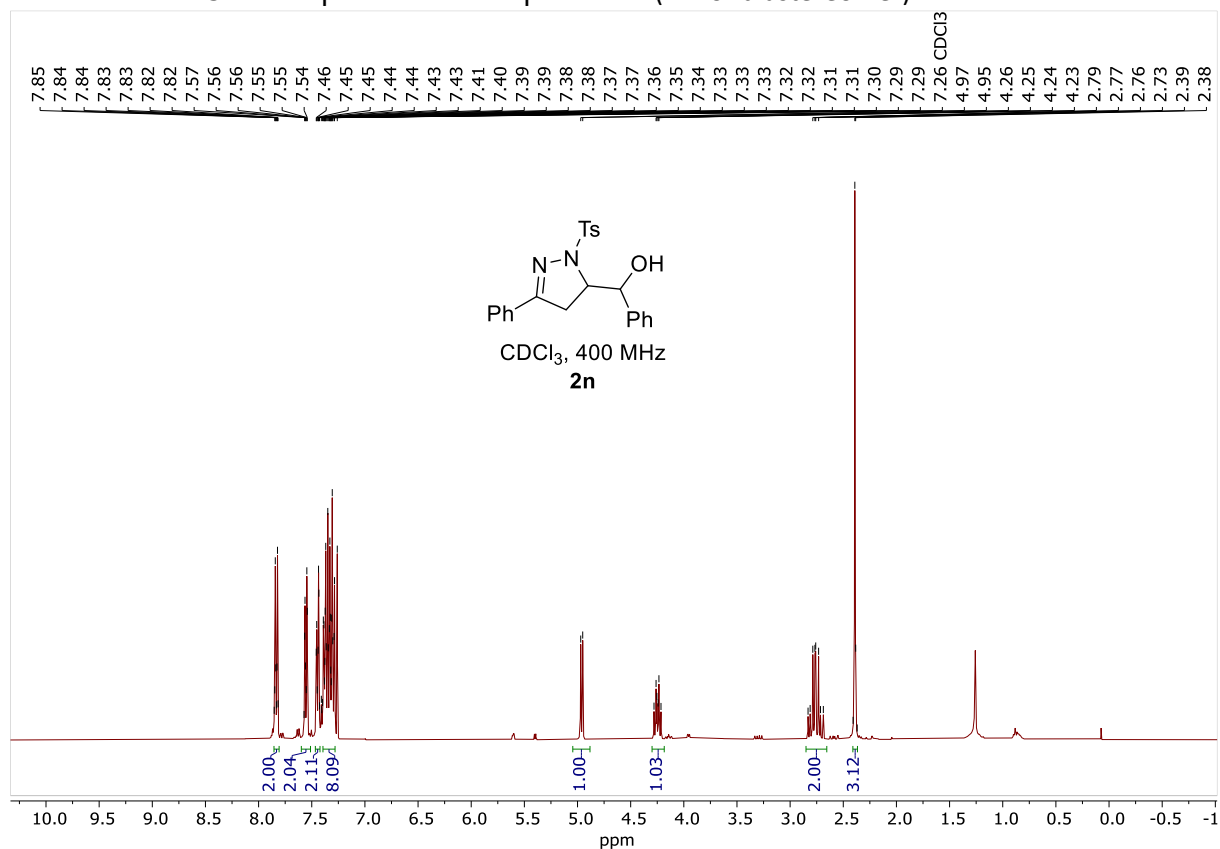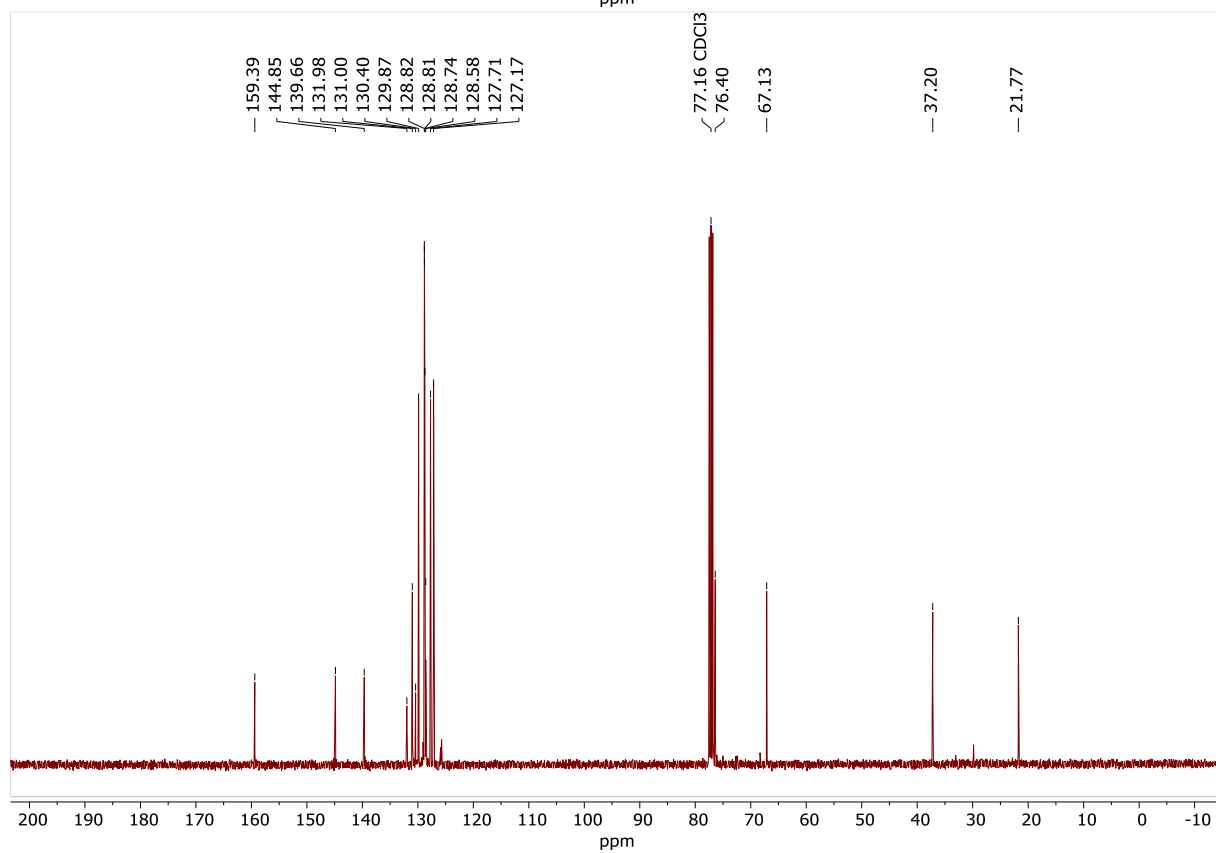

$^1\text{H}$  NMR and  $^{13}\text{C}$  NMR spectrum of compound **2n** (major diastereomer)

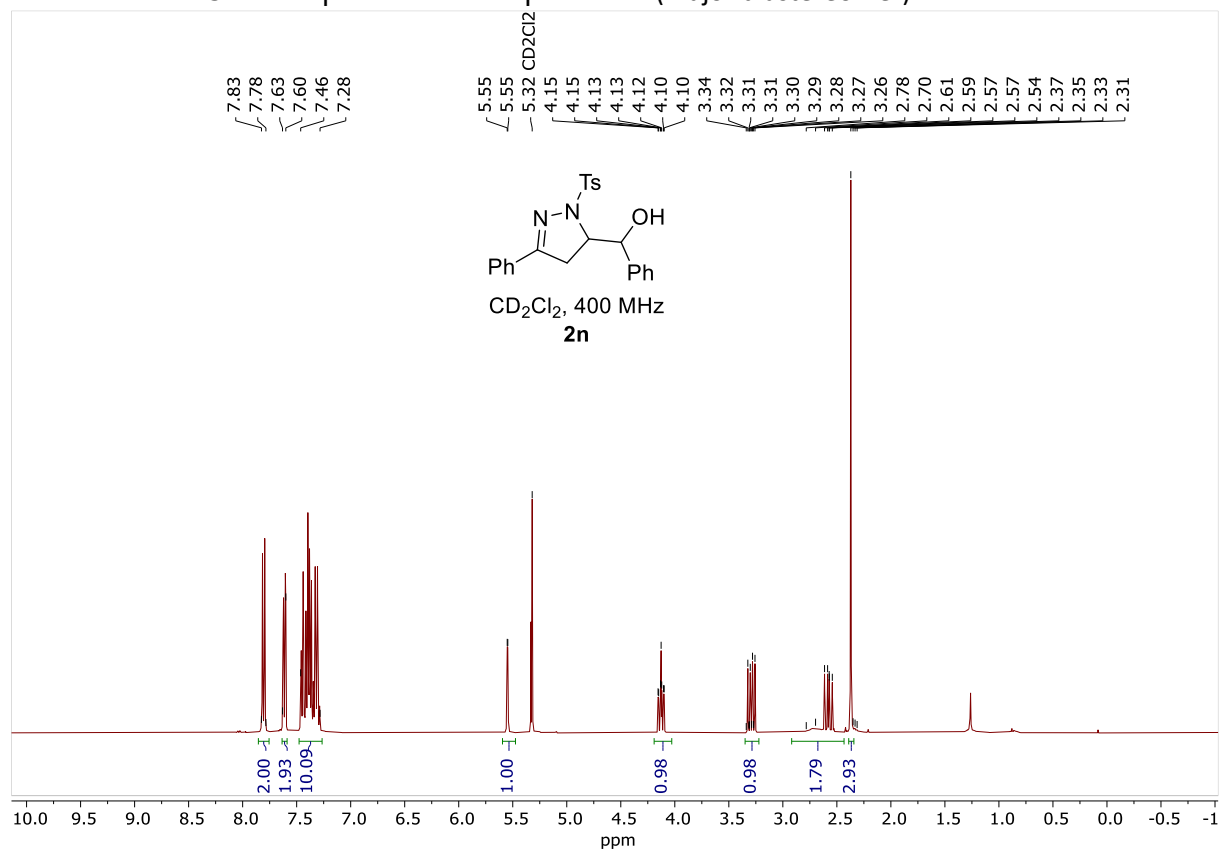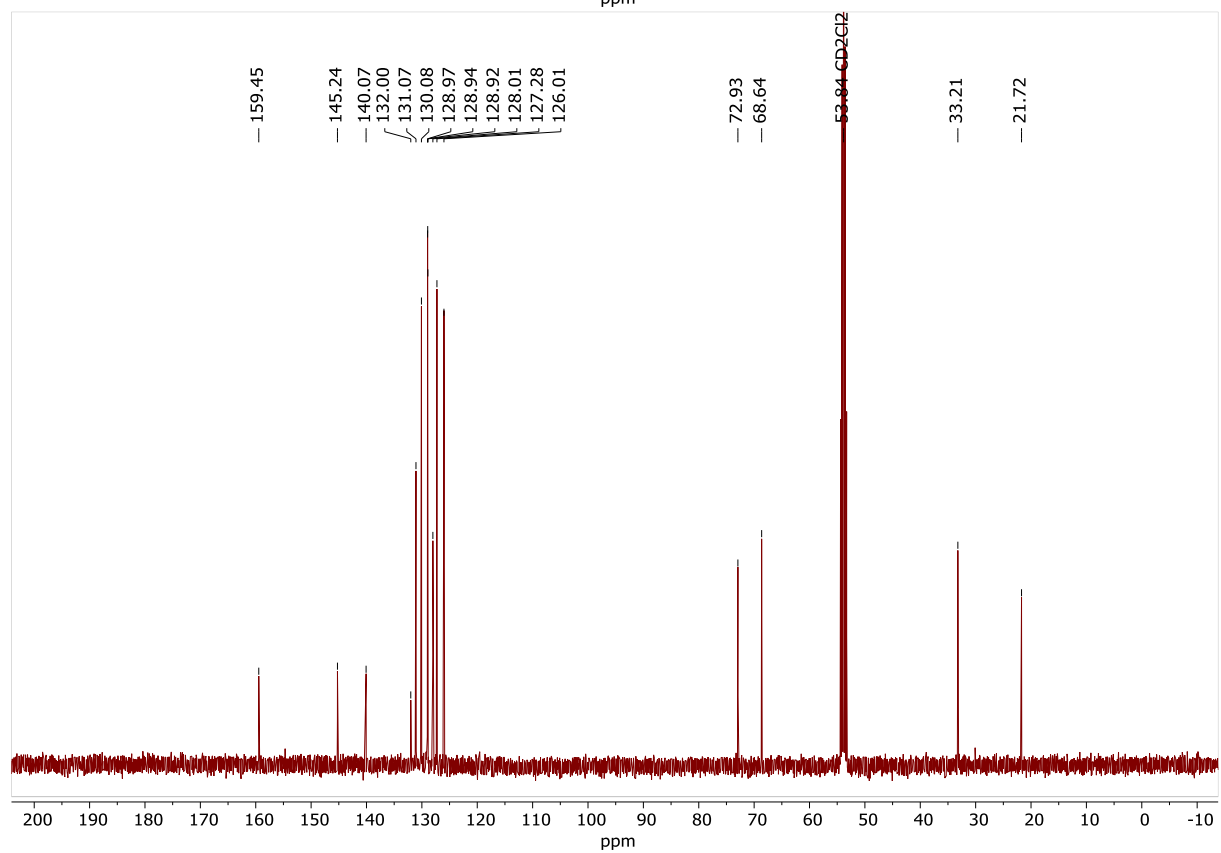

<sup>1</sup>H NMR and <sup>13</sup>C NMR spectrum of compound **2o**

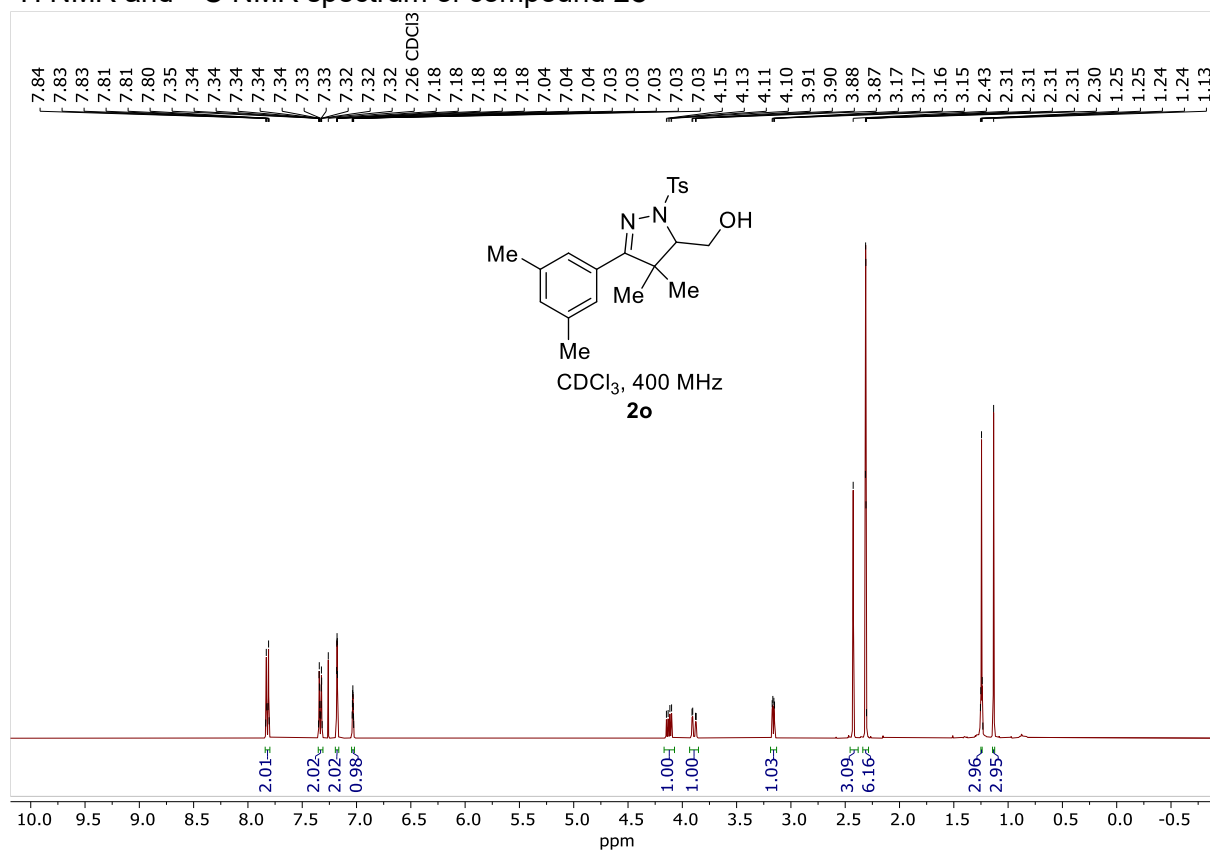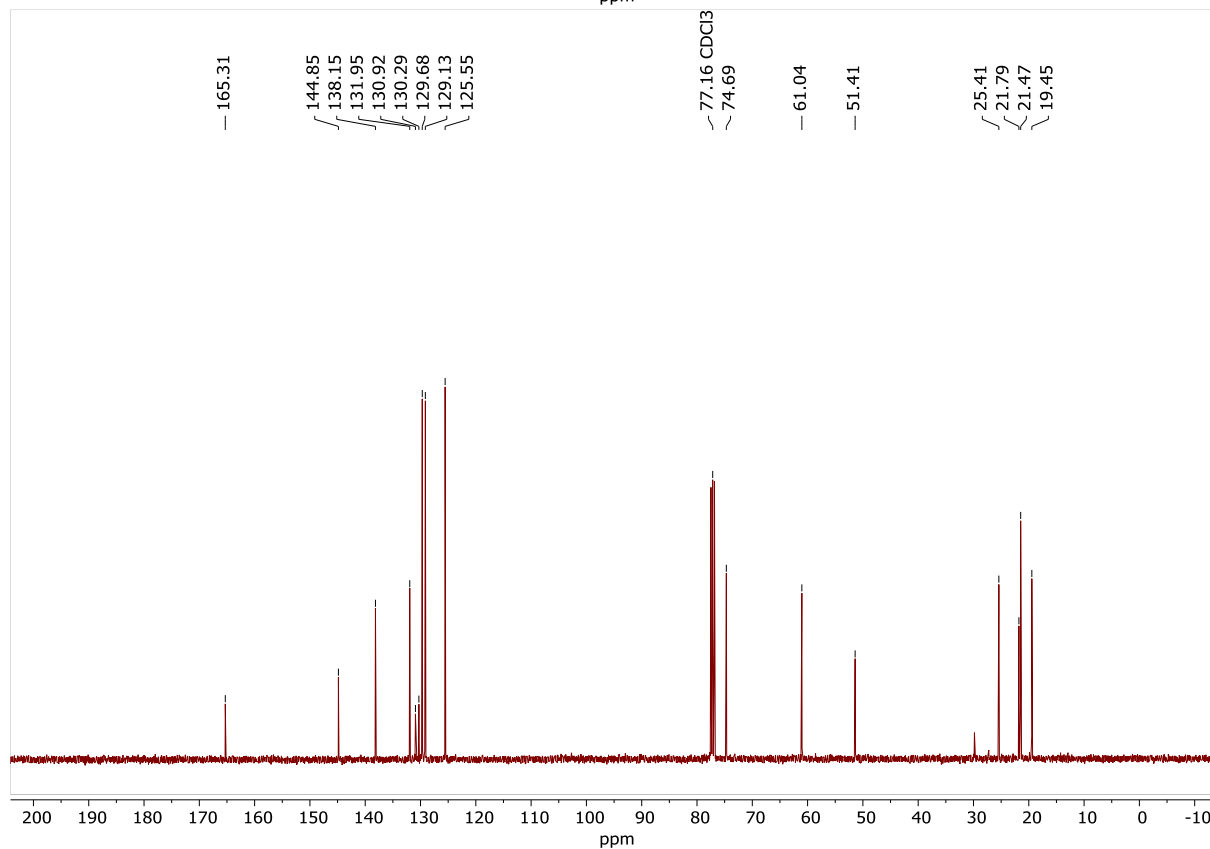

# <sup>1</sup>H NMR and <sup>13</sup>C NMR spectrum of compound **2p**

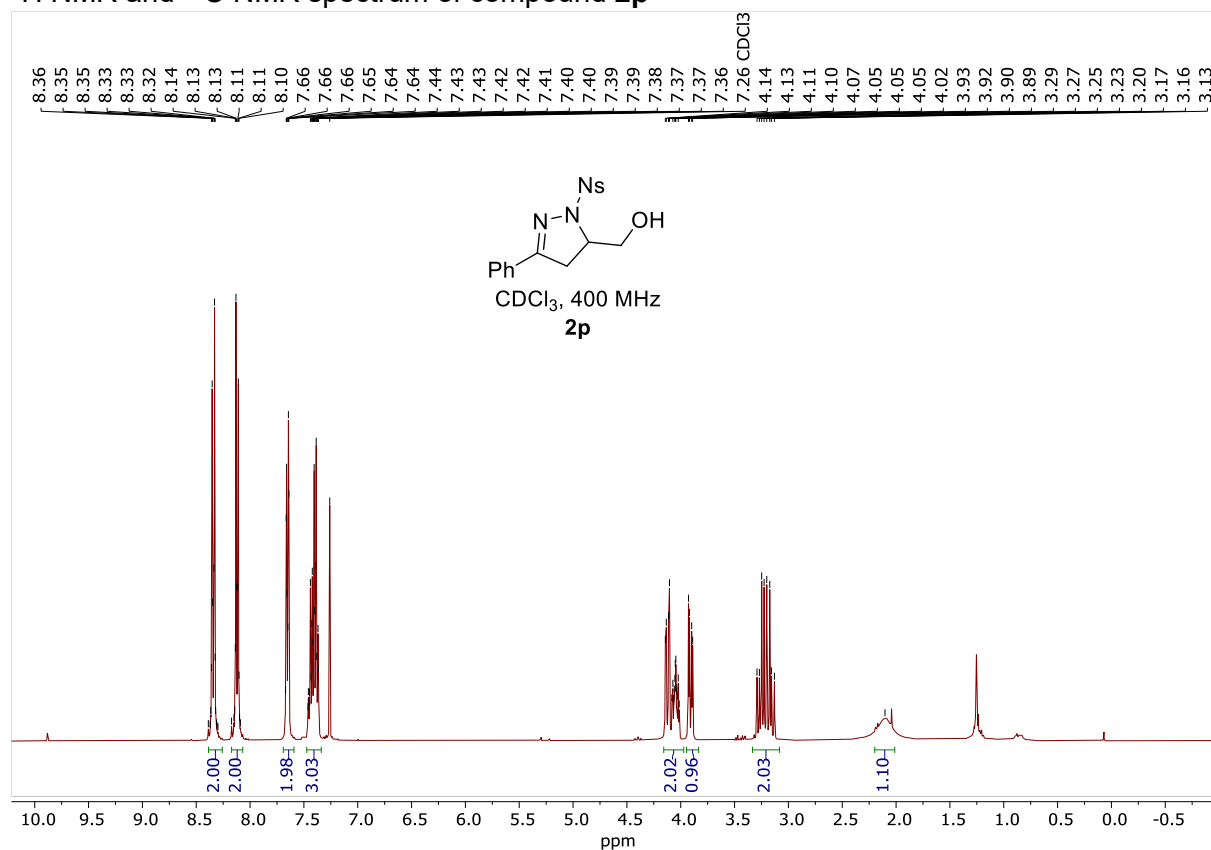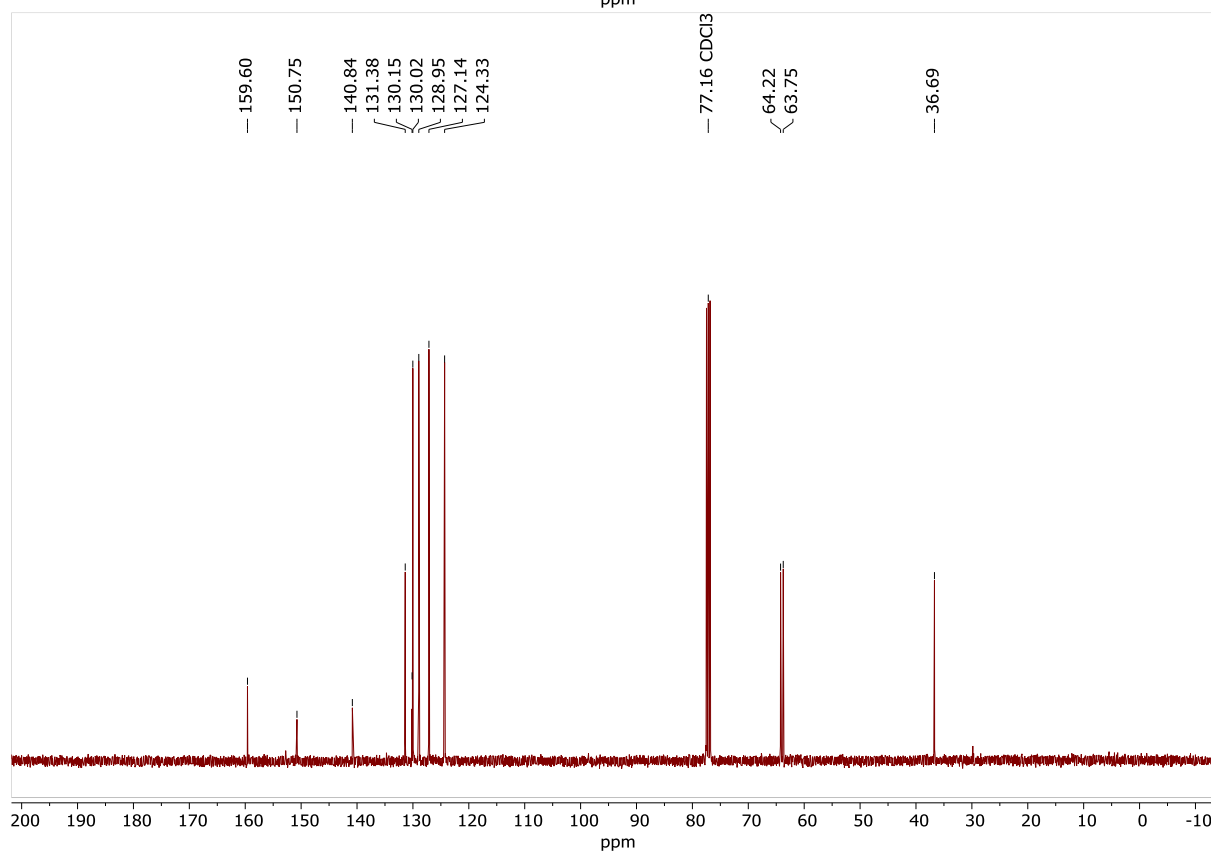

<sup>1</sup>H NMR and <sup>13</sup>C NMR spectrum of compound **2q**

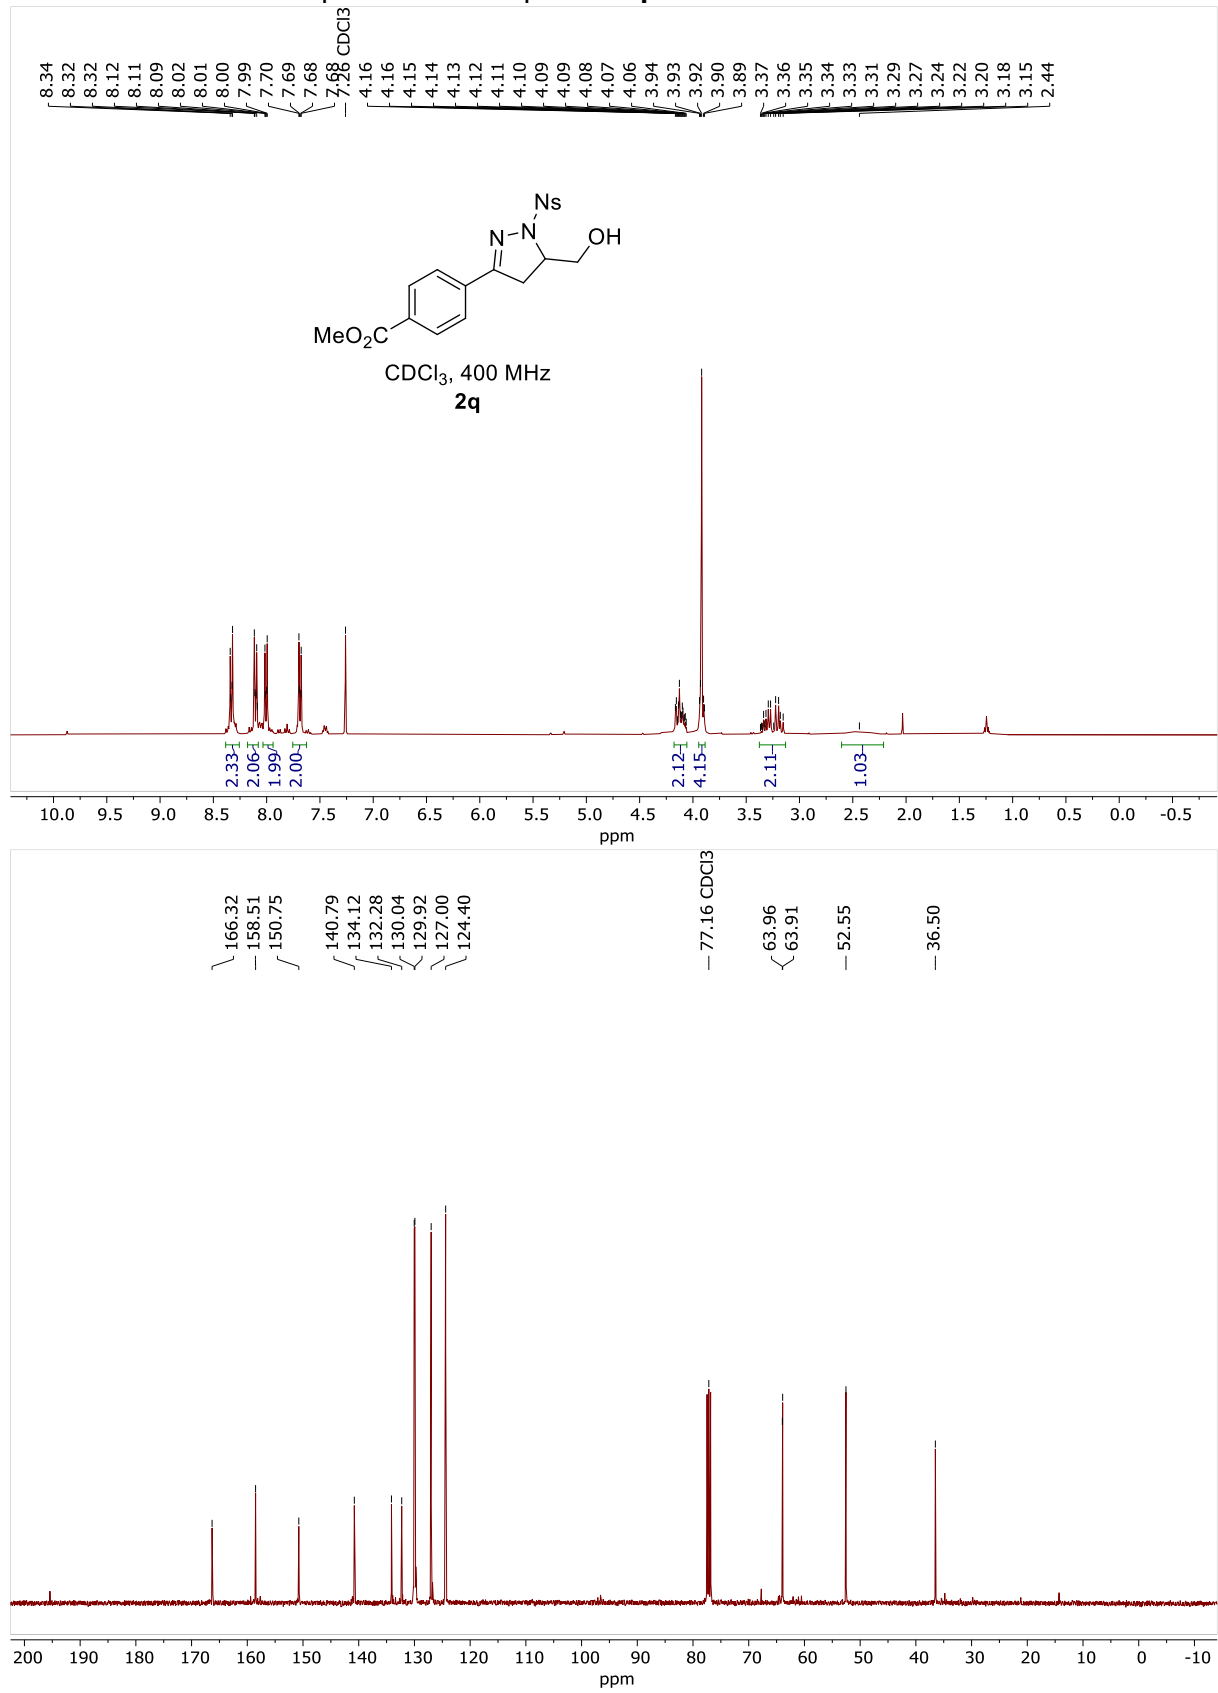

<sup>1</sup>H NMR and <sup>13</sup>C NMR spectrum of compound **2r**

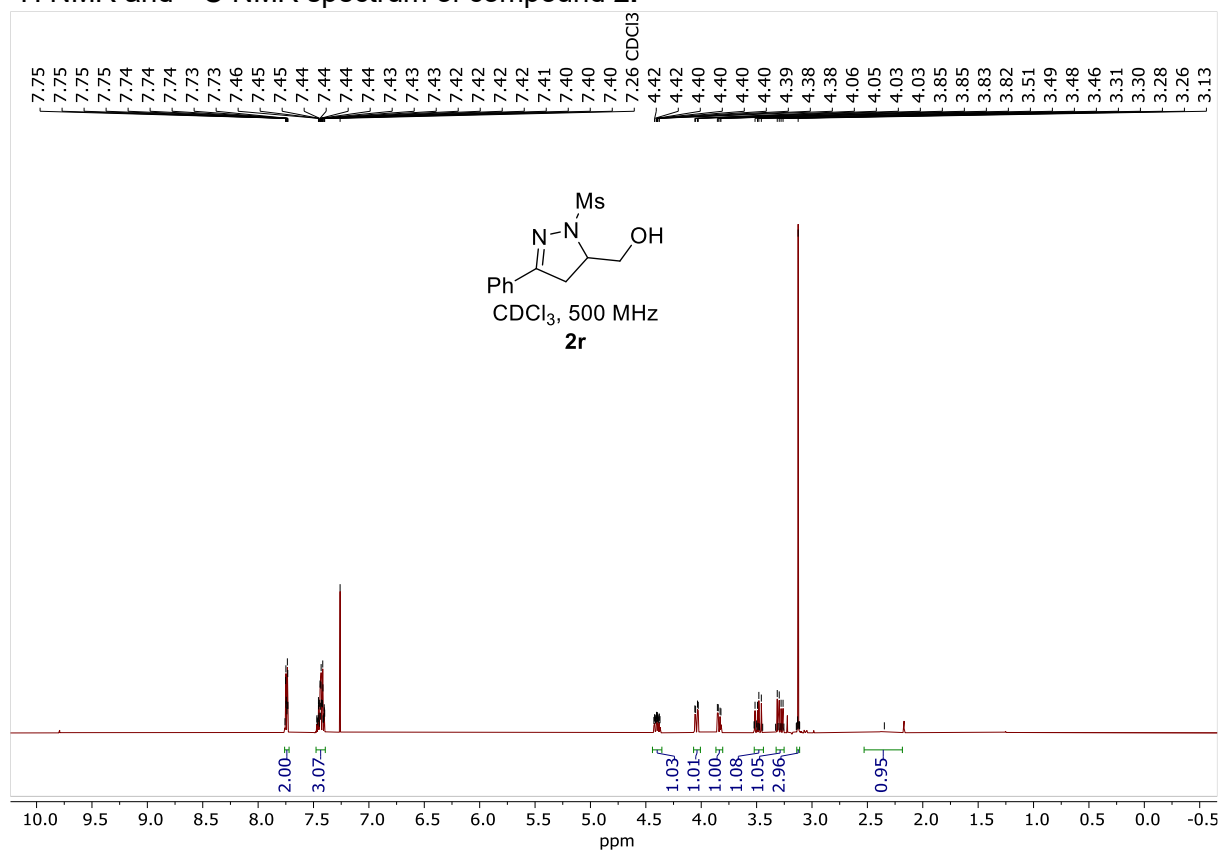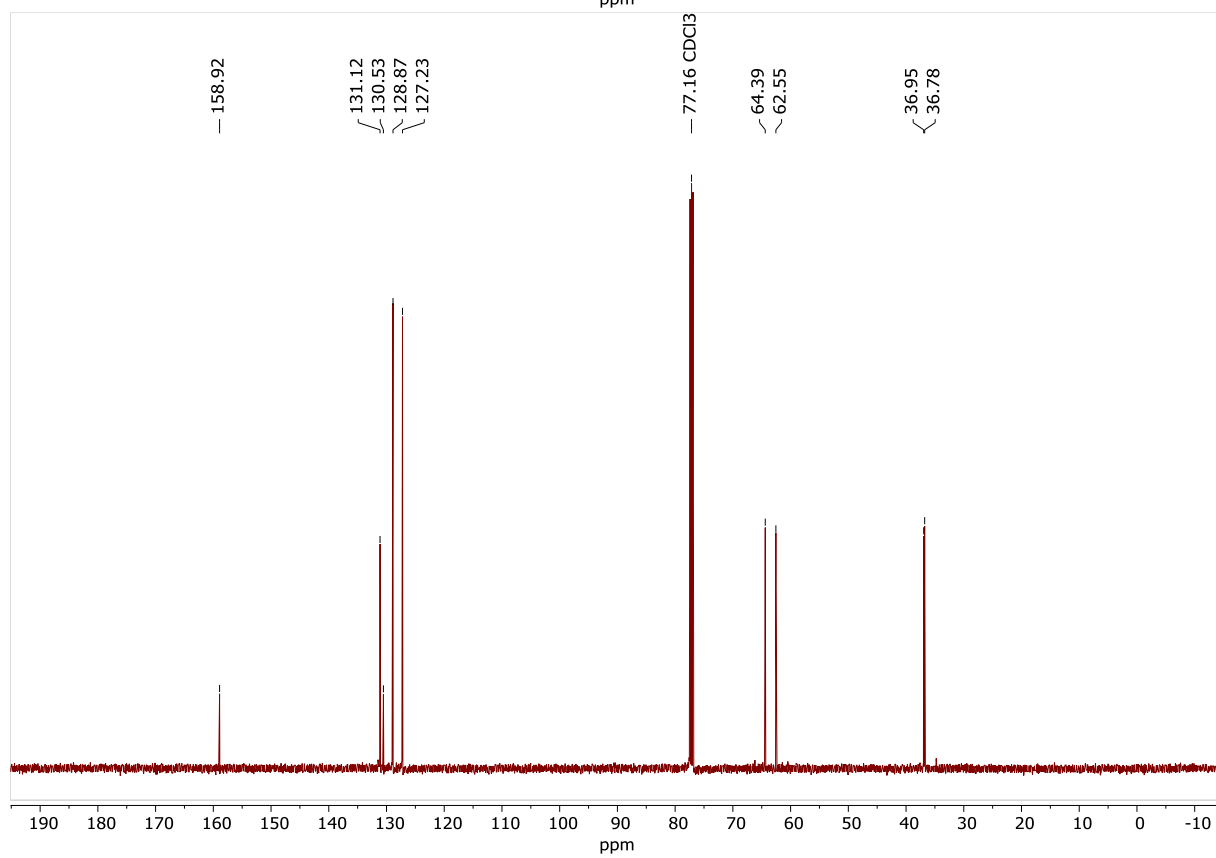



<sup>1</sup>H NMR and <sup>13</sup>C NMR spectrum of compound **2s**

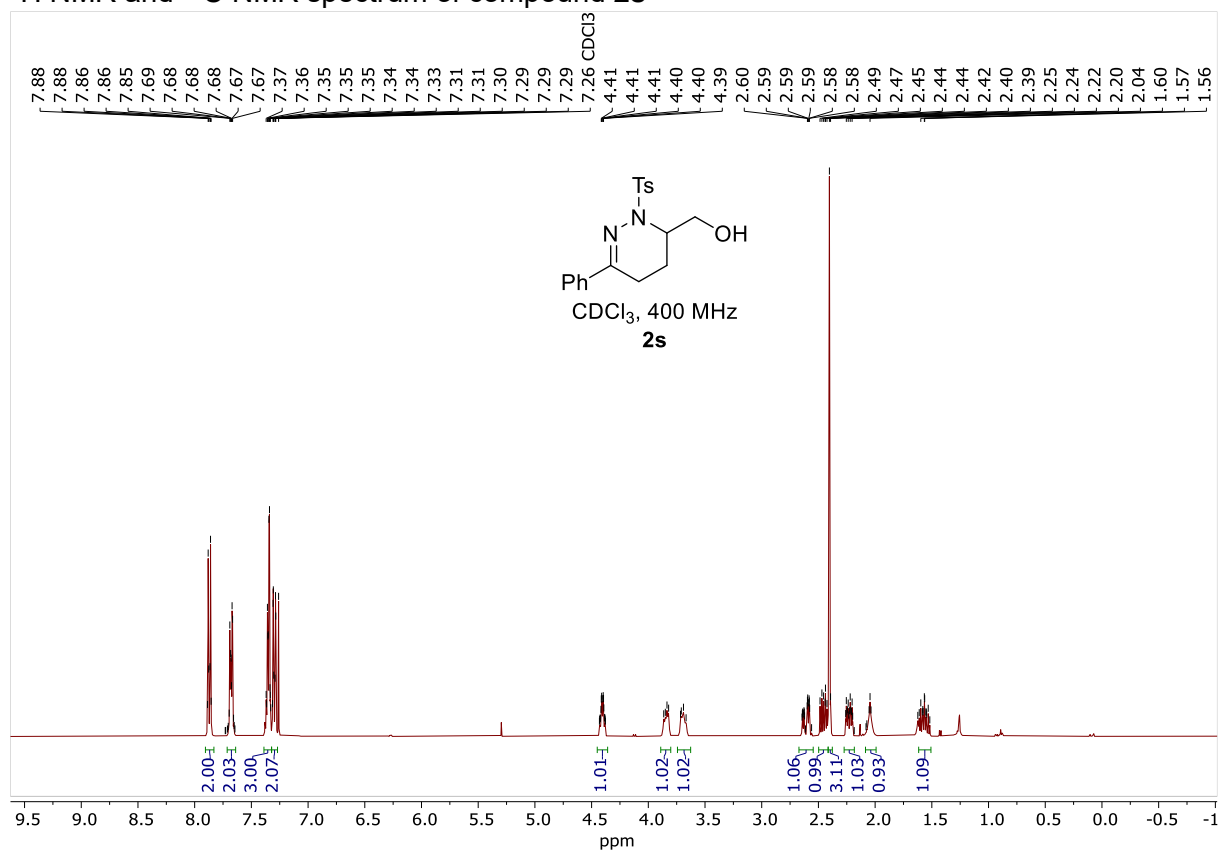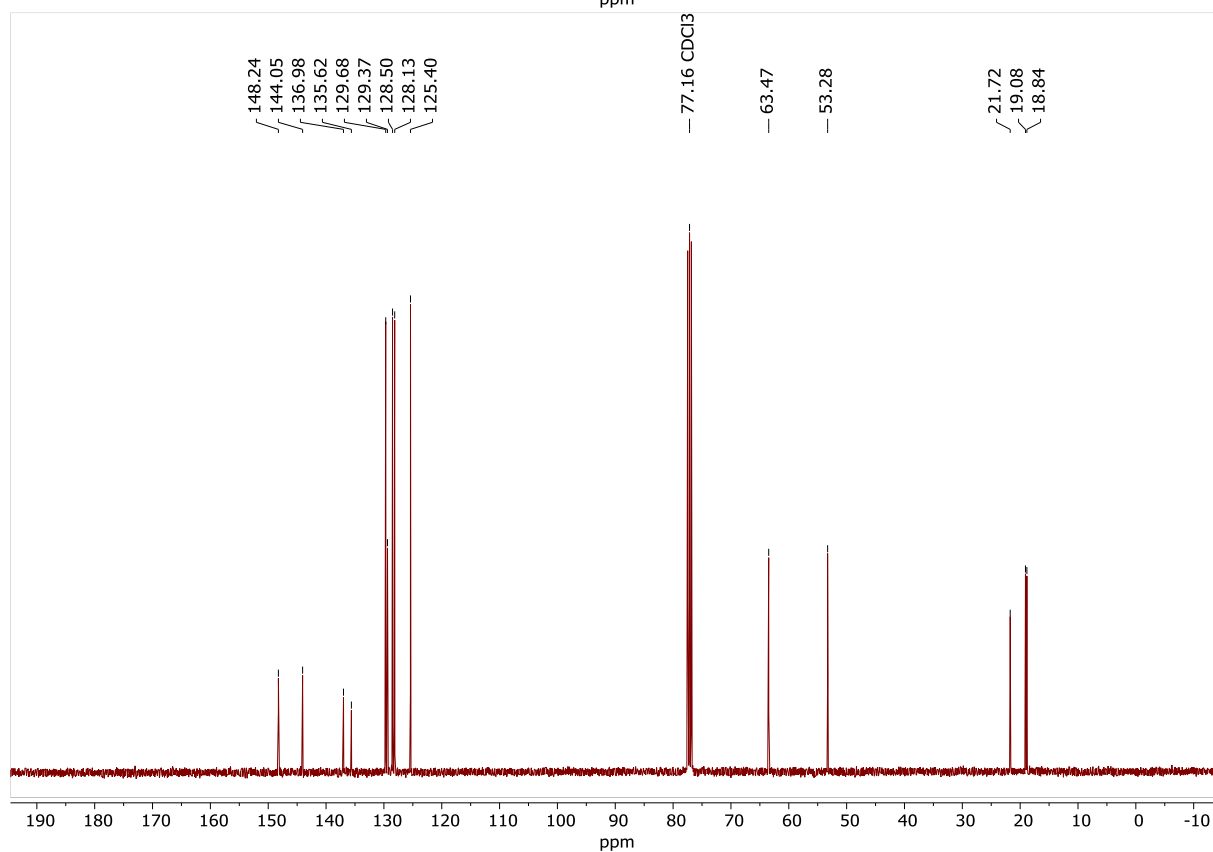

$^1\text{H}$  NMR and  $^{13}\text{C}$  NMR spectrum of compound **2t**

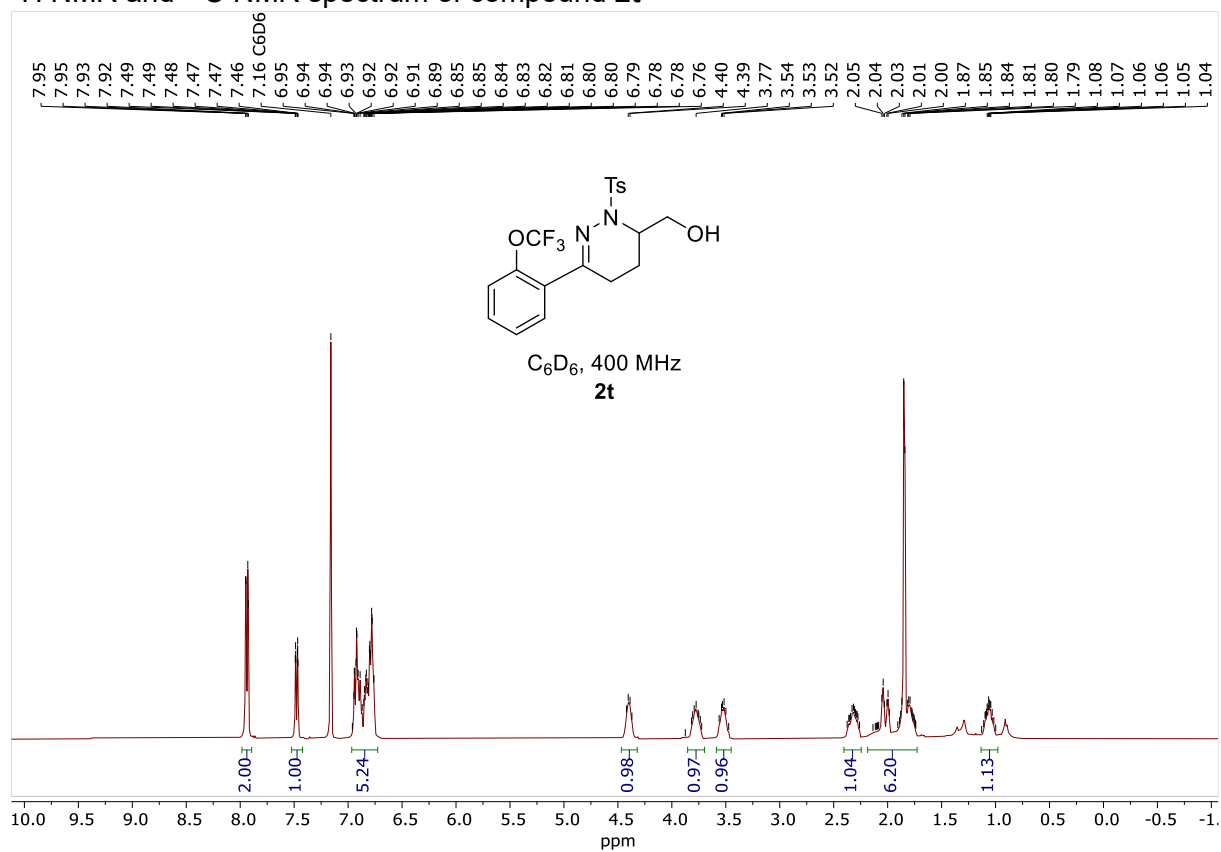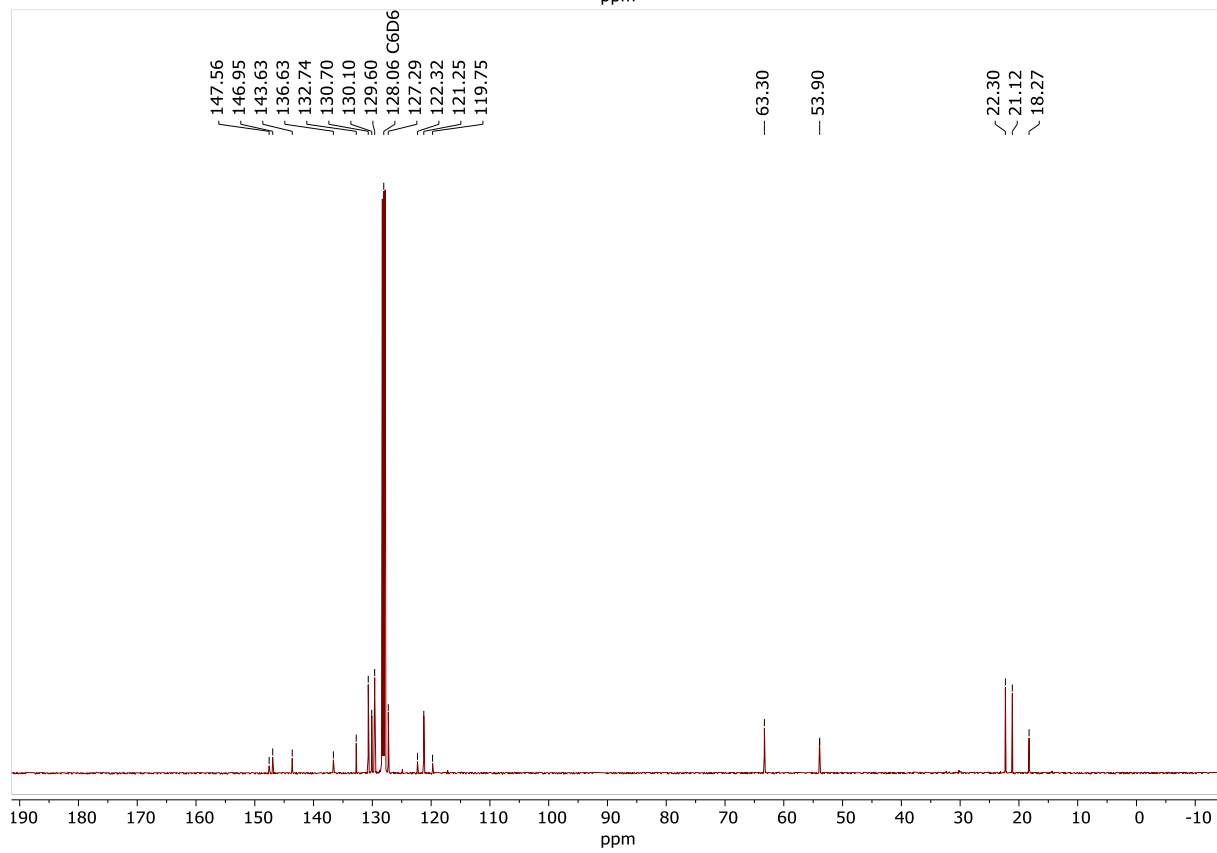

<sup>1</sup>H NMR and <sup>13</sup>C NMR spectrum of compound **2u**

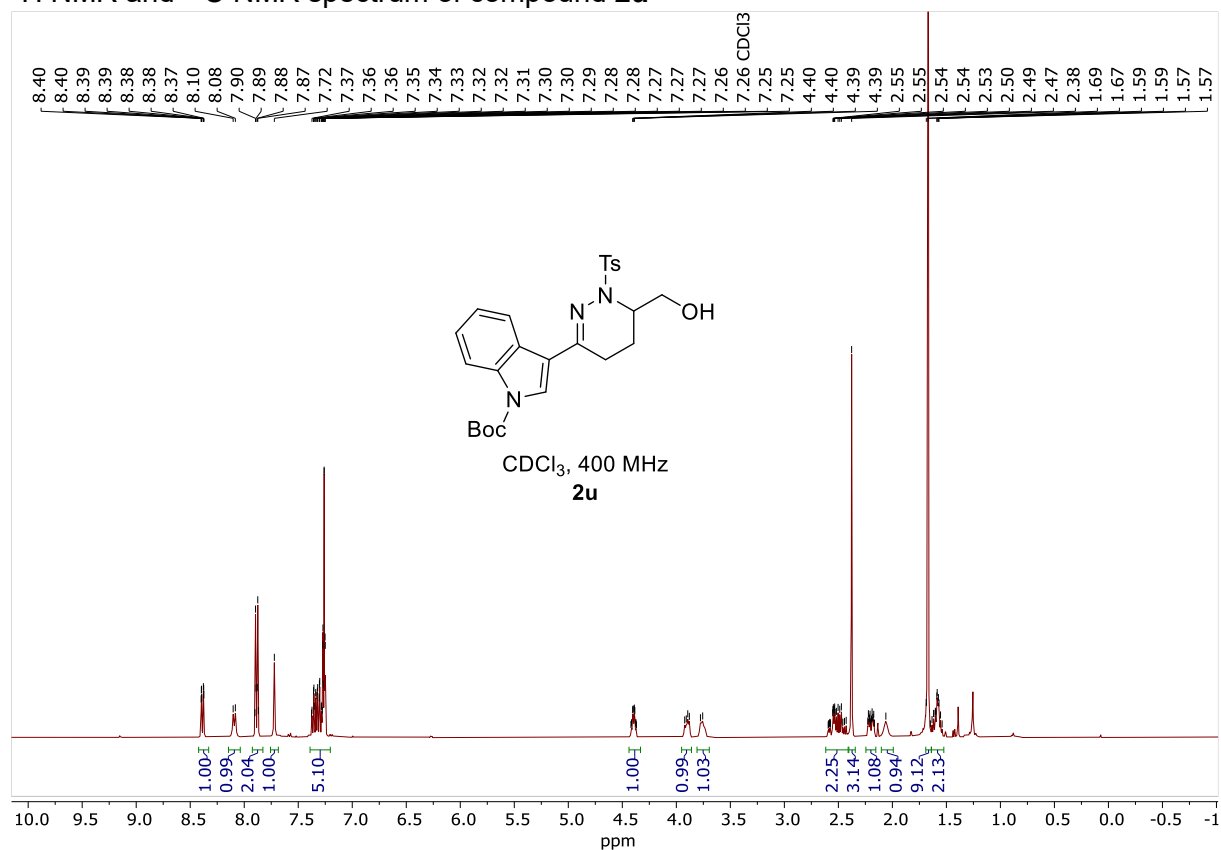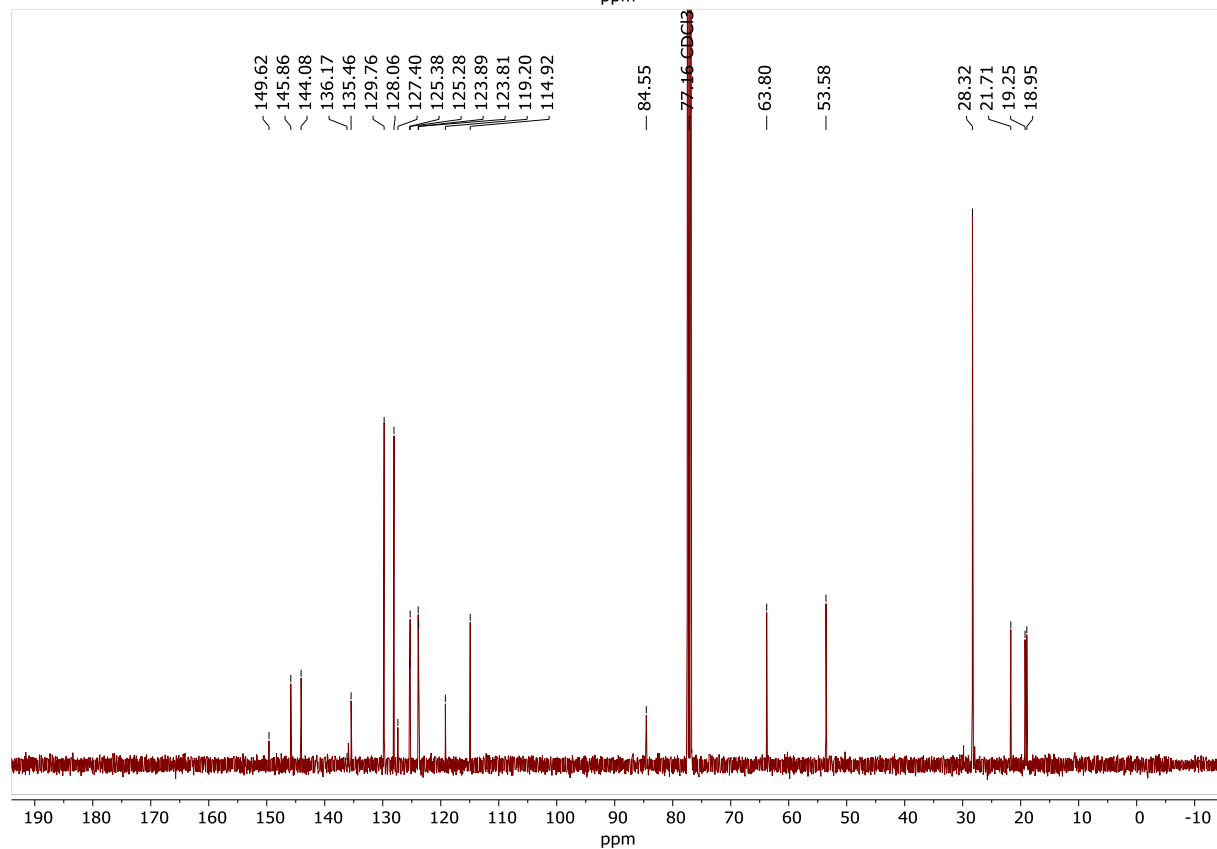

<sup>1</sup>H NMR and <sup>13</sup>C NMR spectrum of compound **2v**

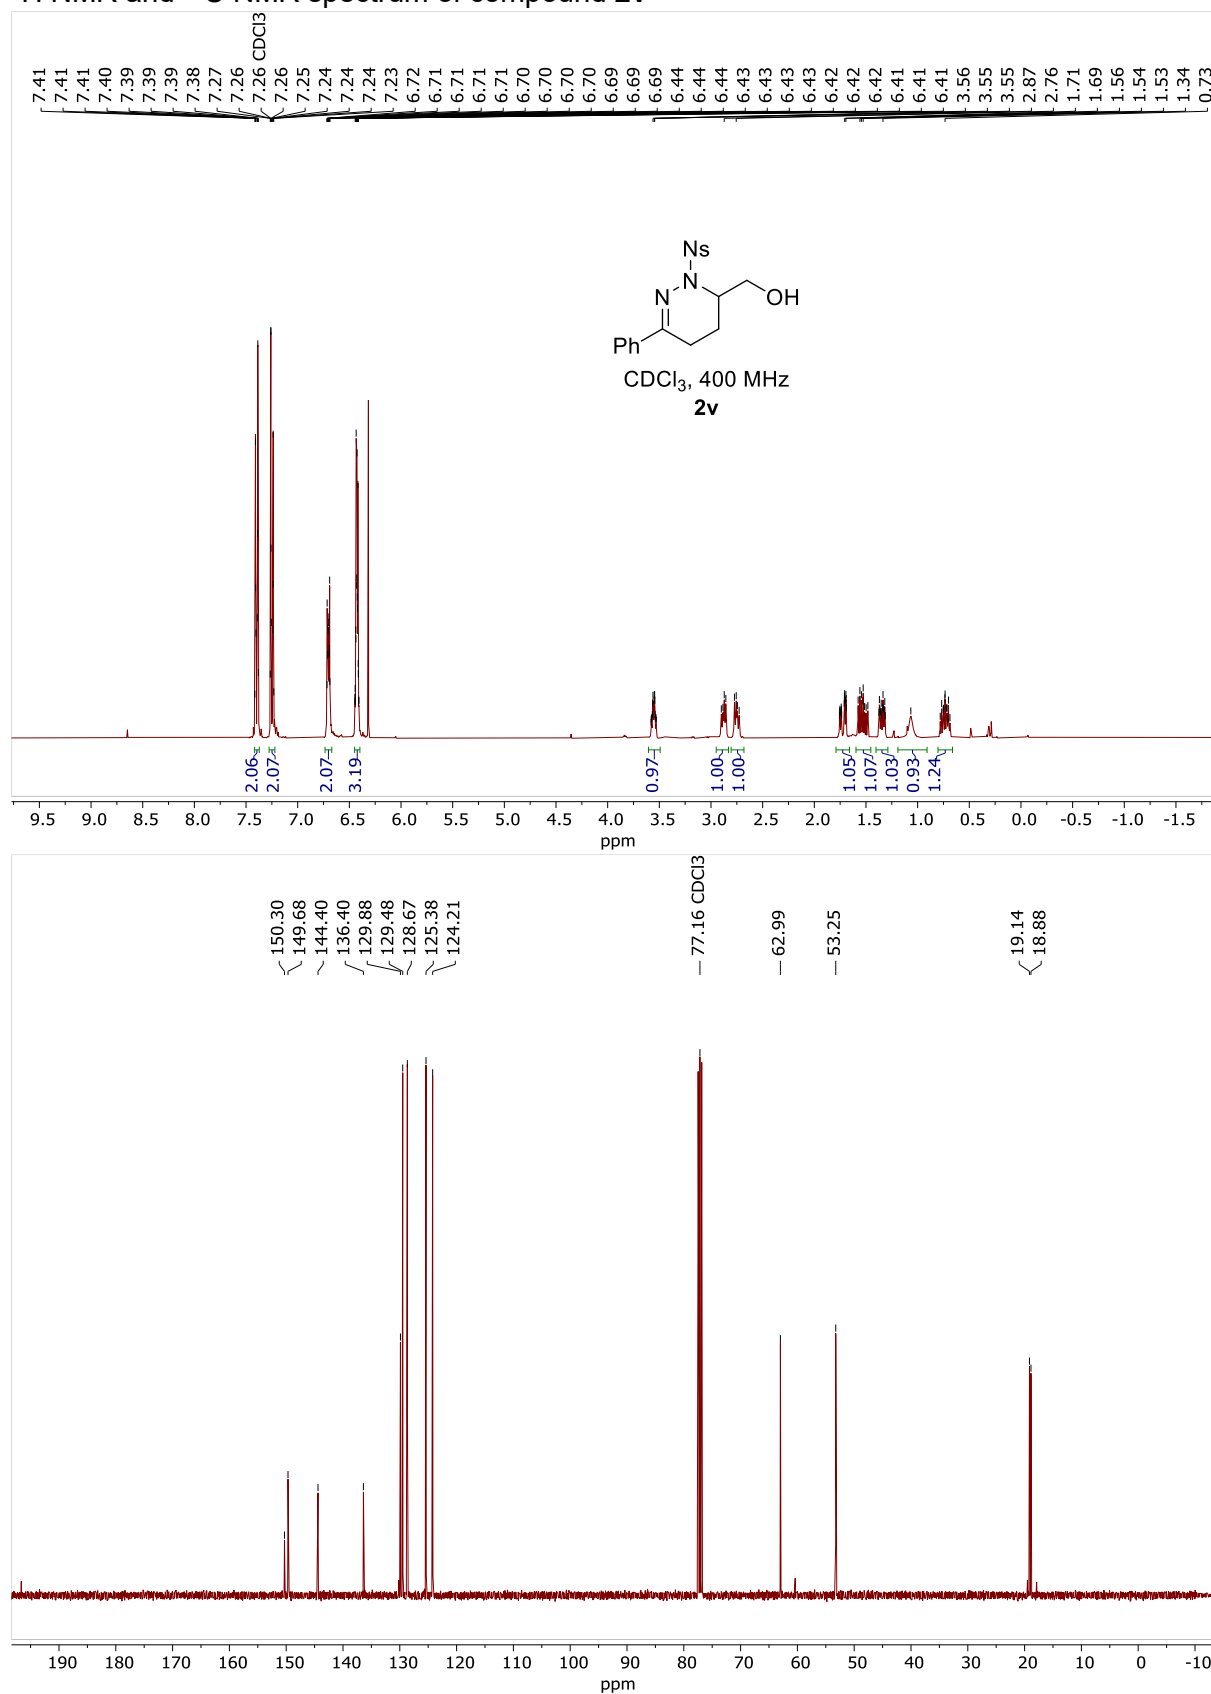

<sup>1</sup>H NMR and <sup>13</sup>C NMR spectrum of compound **6a**

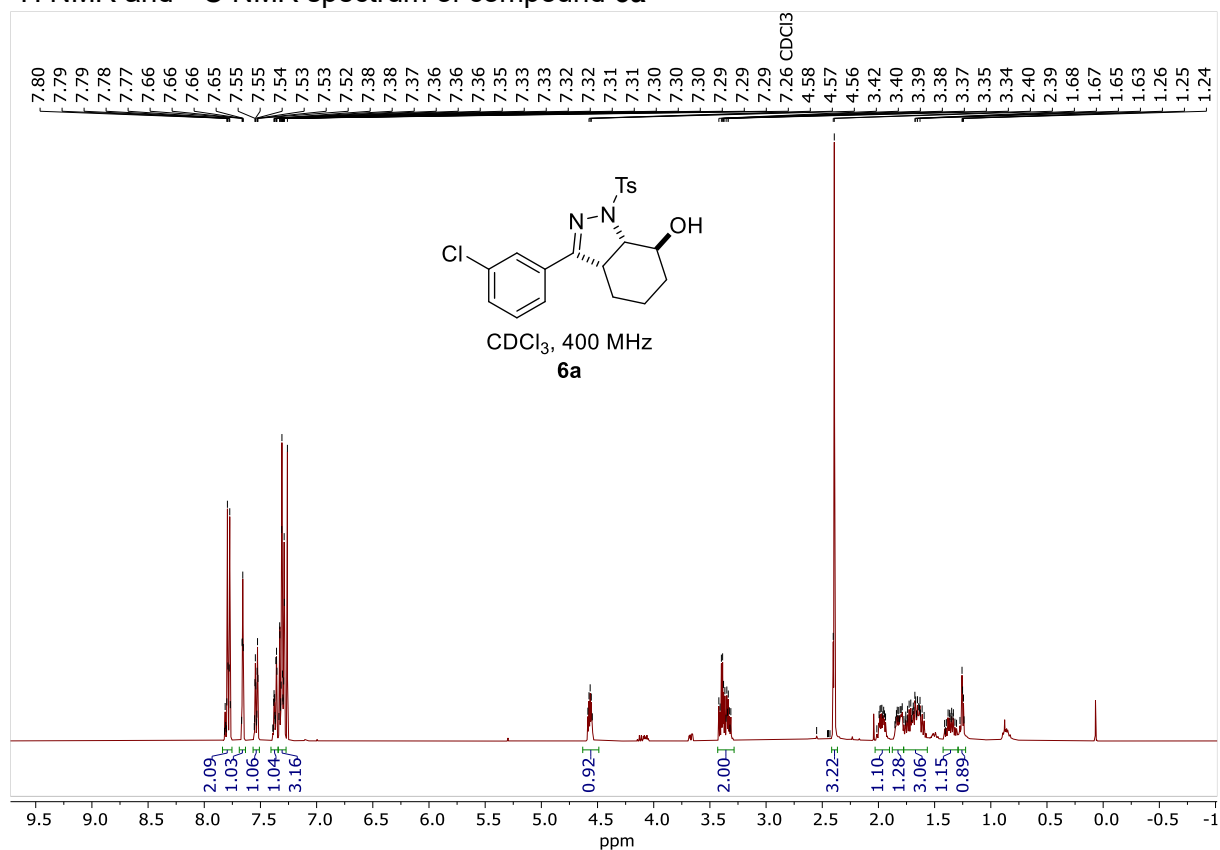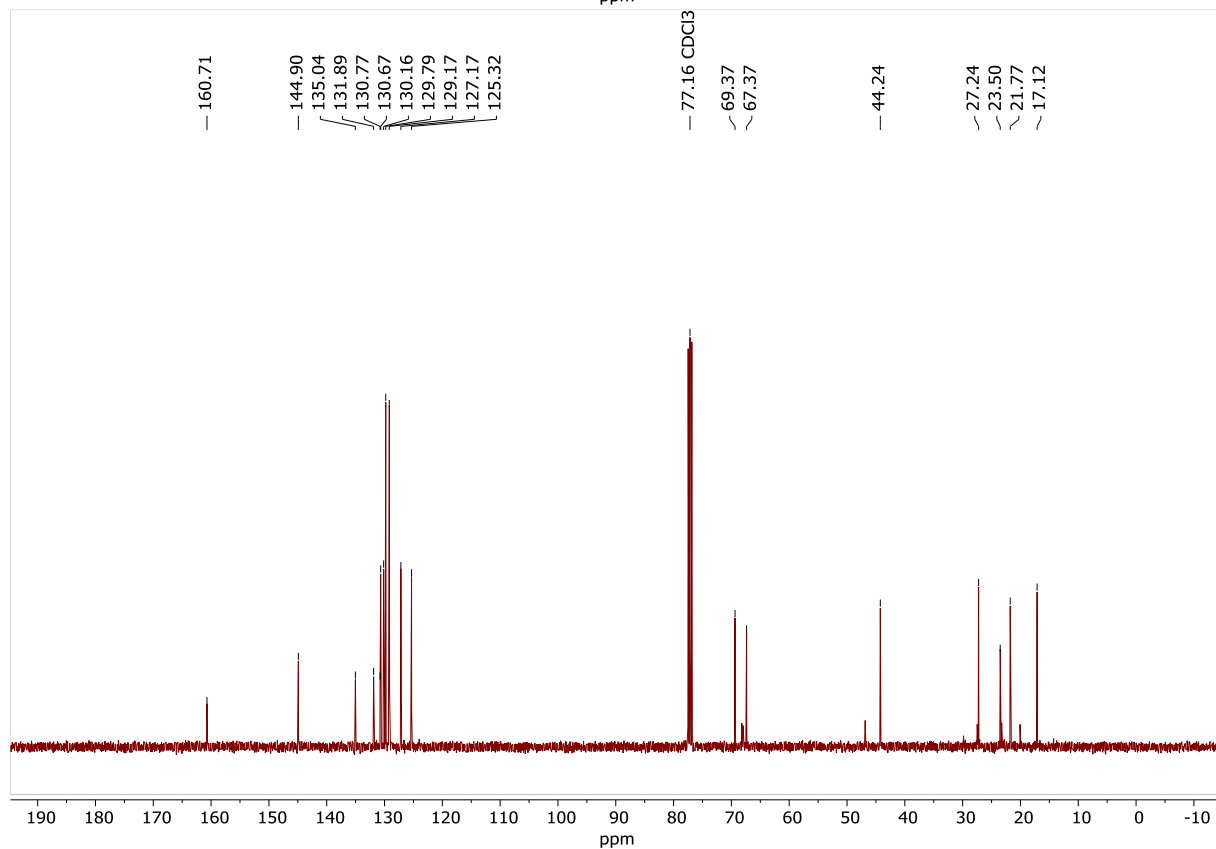

<sup>1</sup>H NMR and <sup>13</sup>C NMR spectrum of compound **6b**

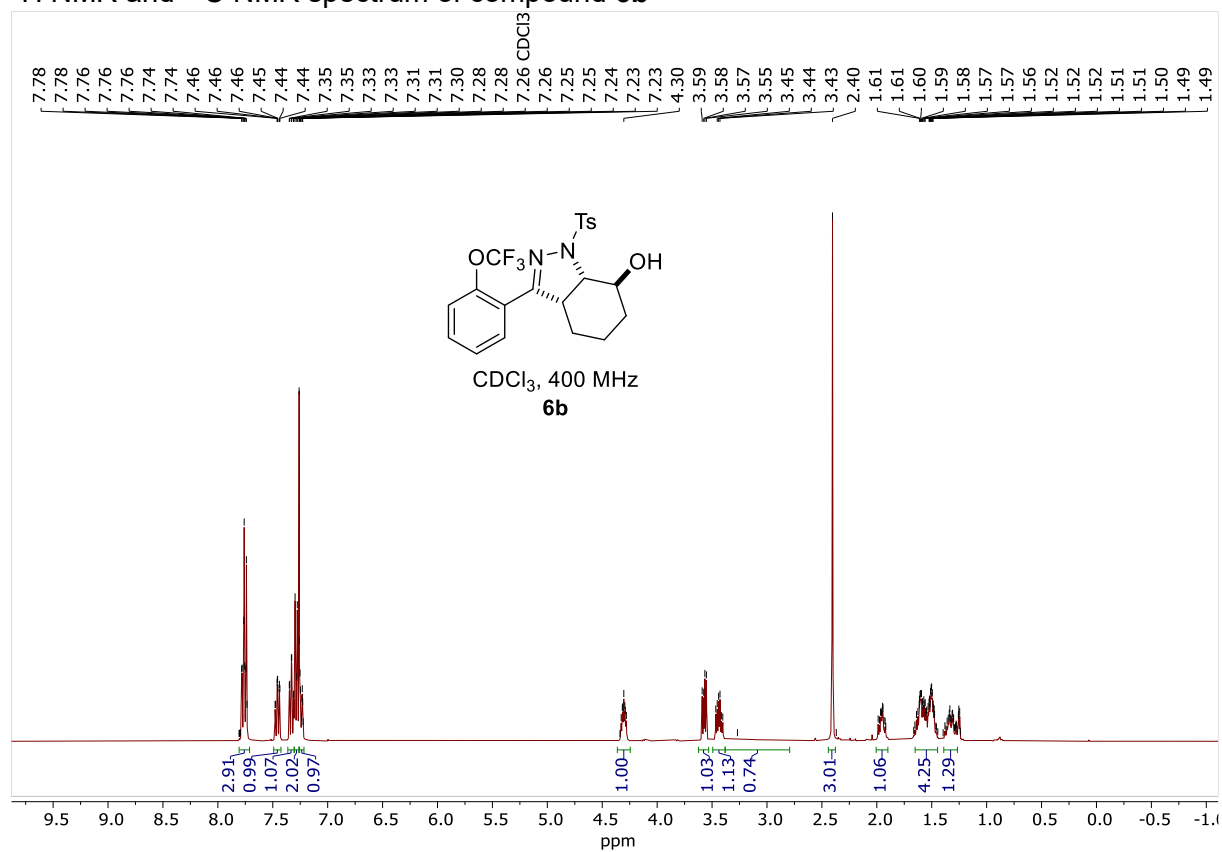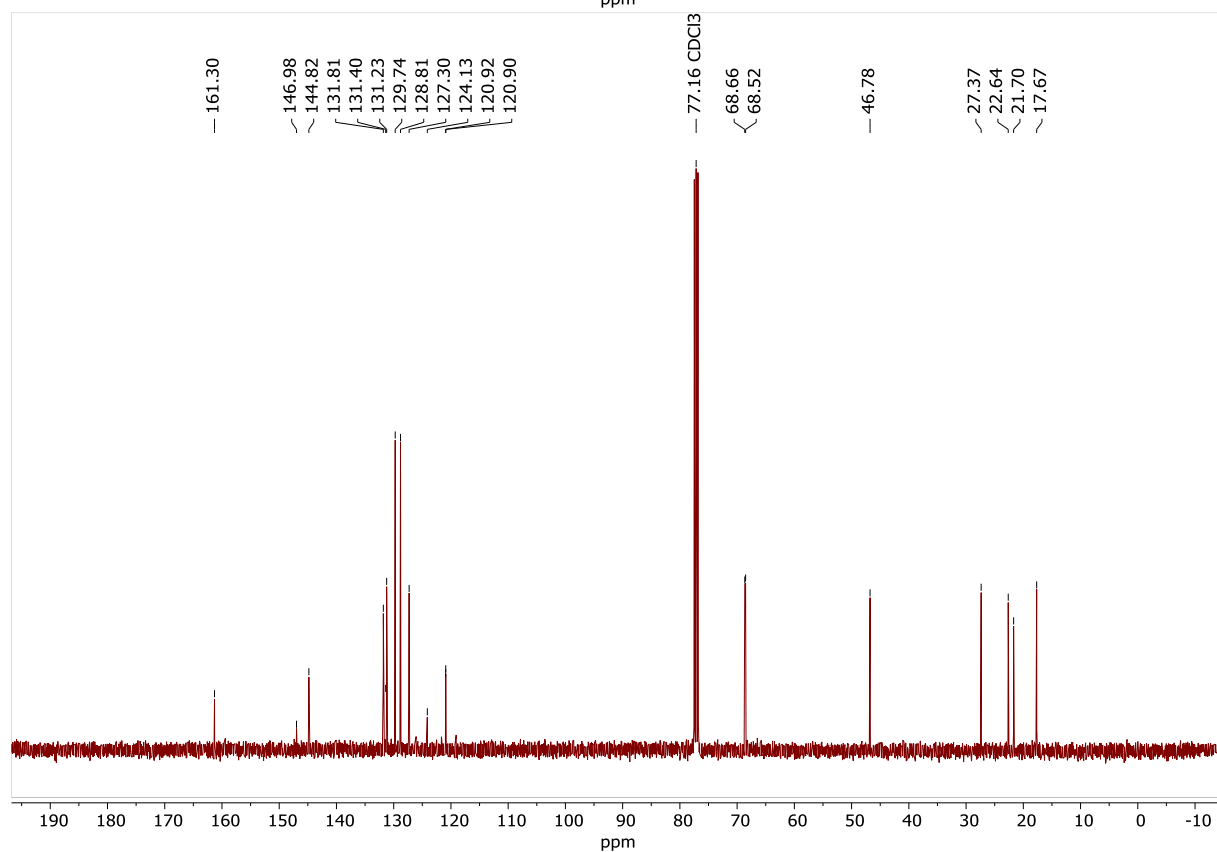

<sup>1</sup>H NMR and <sup>13</sup>C NMR spectrum of compound **6c**

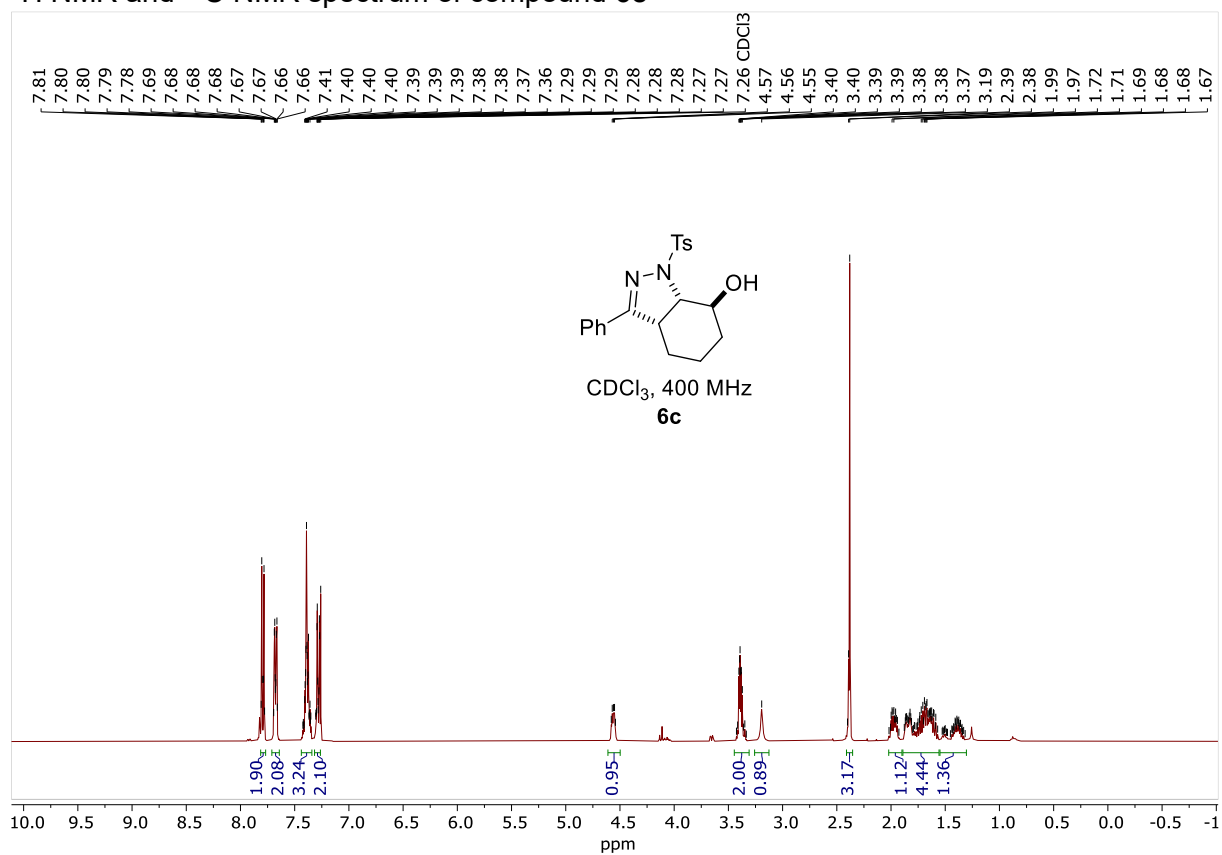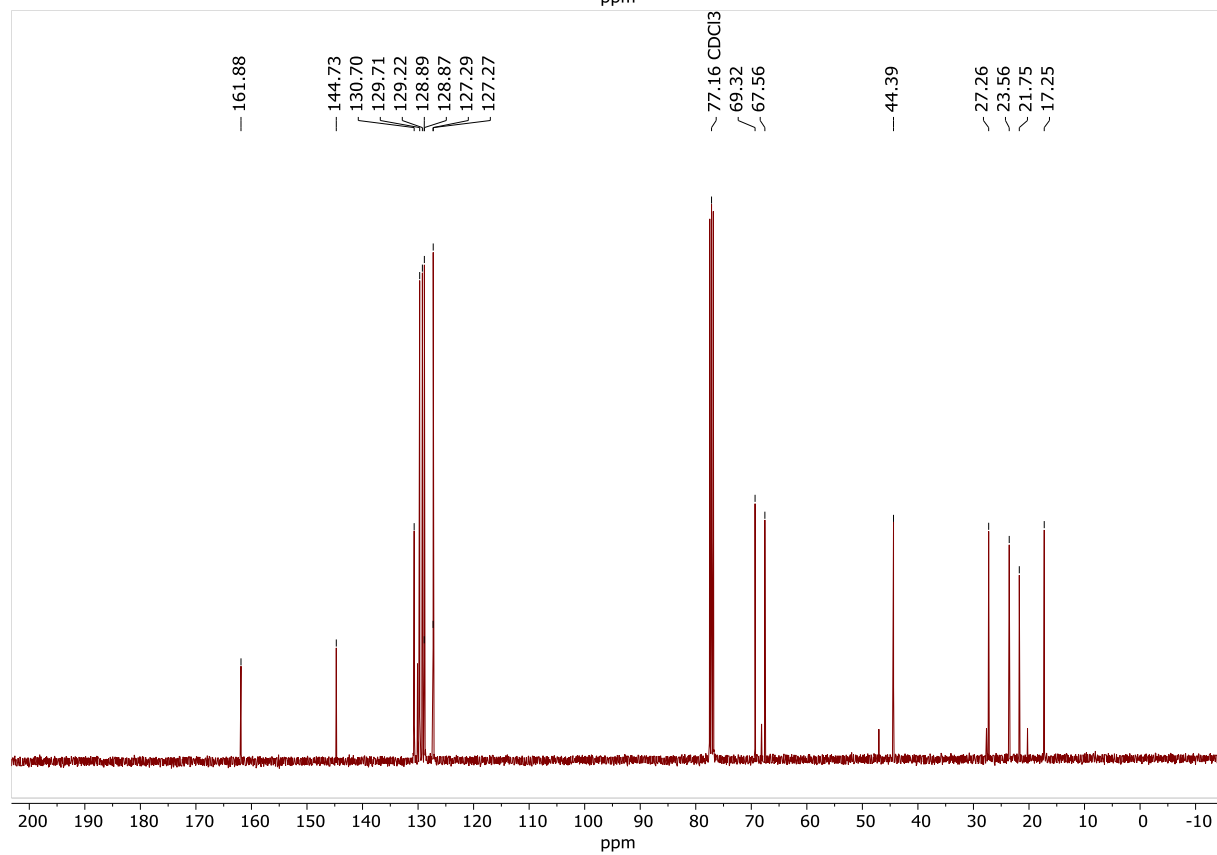

$^1\text{H}$  NMR,  $^{13}\text{C}$  NMR, 1D NOE spectra of compound **6c** (minor diastereomer)

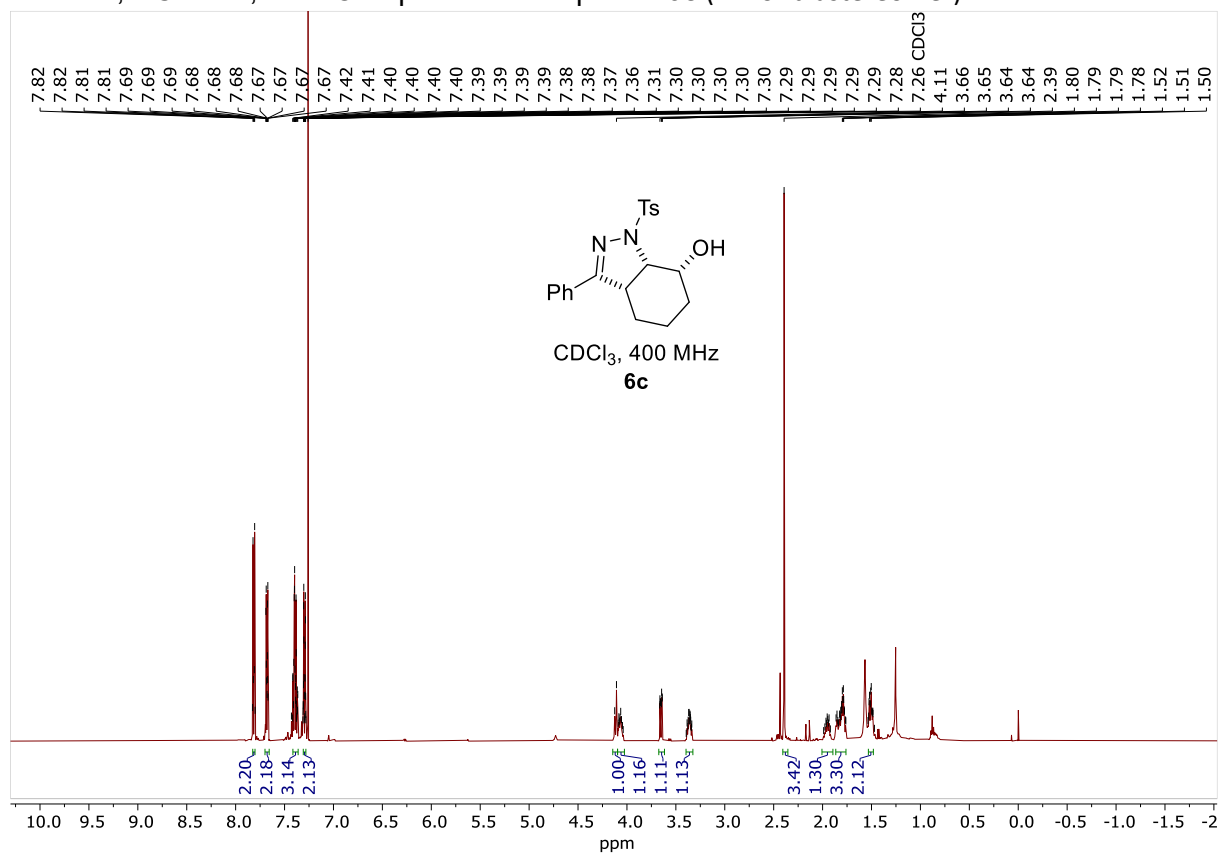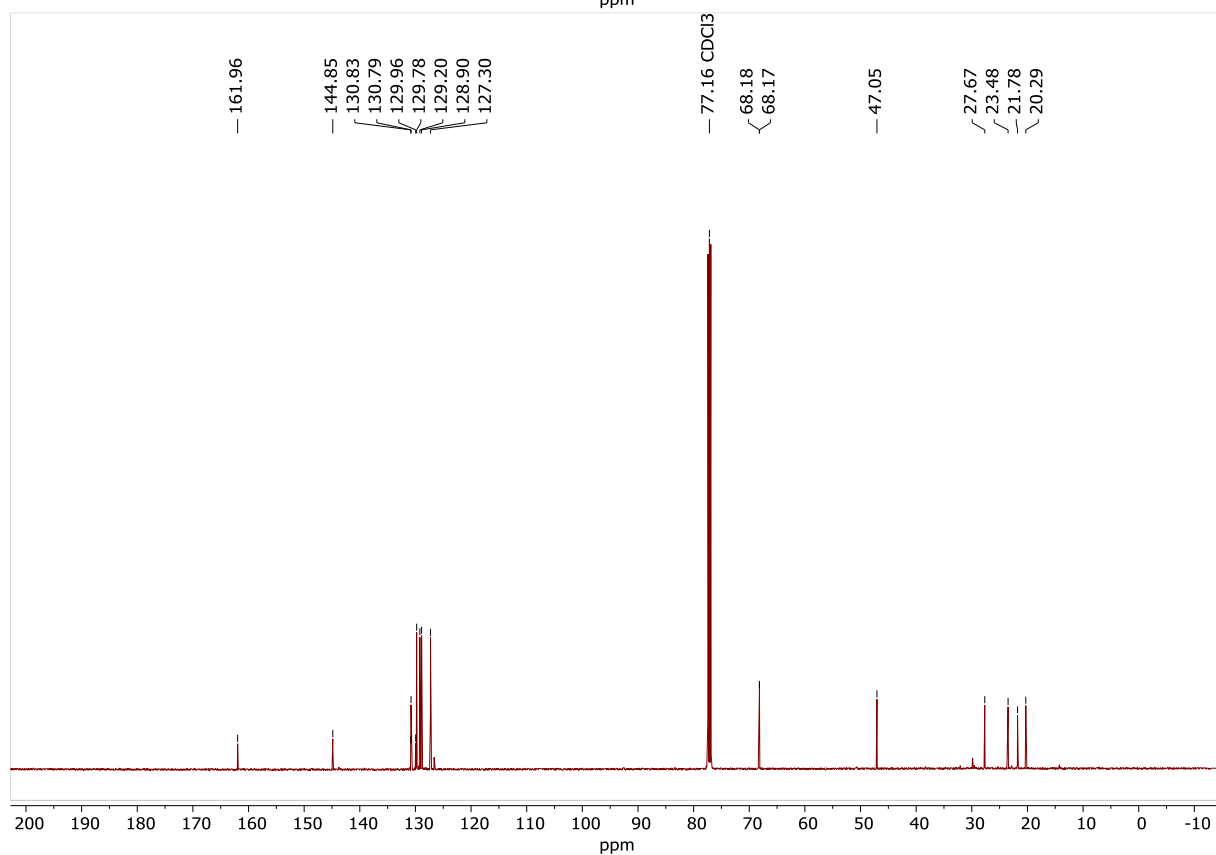



1D NOE NMR (500 MHz, CDCl<sub>3</sub>) of **6c** (minor diastereomer) irradiated at 3.37 ppm.

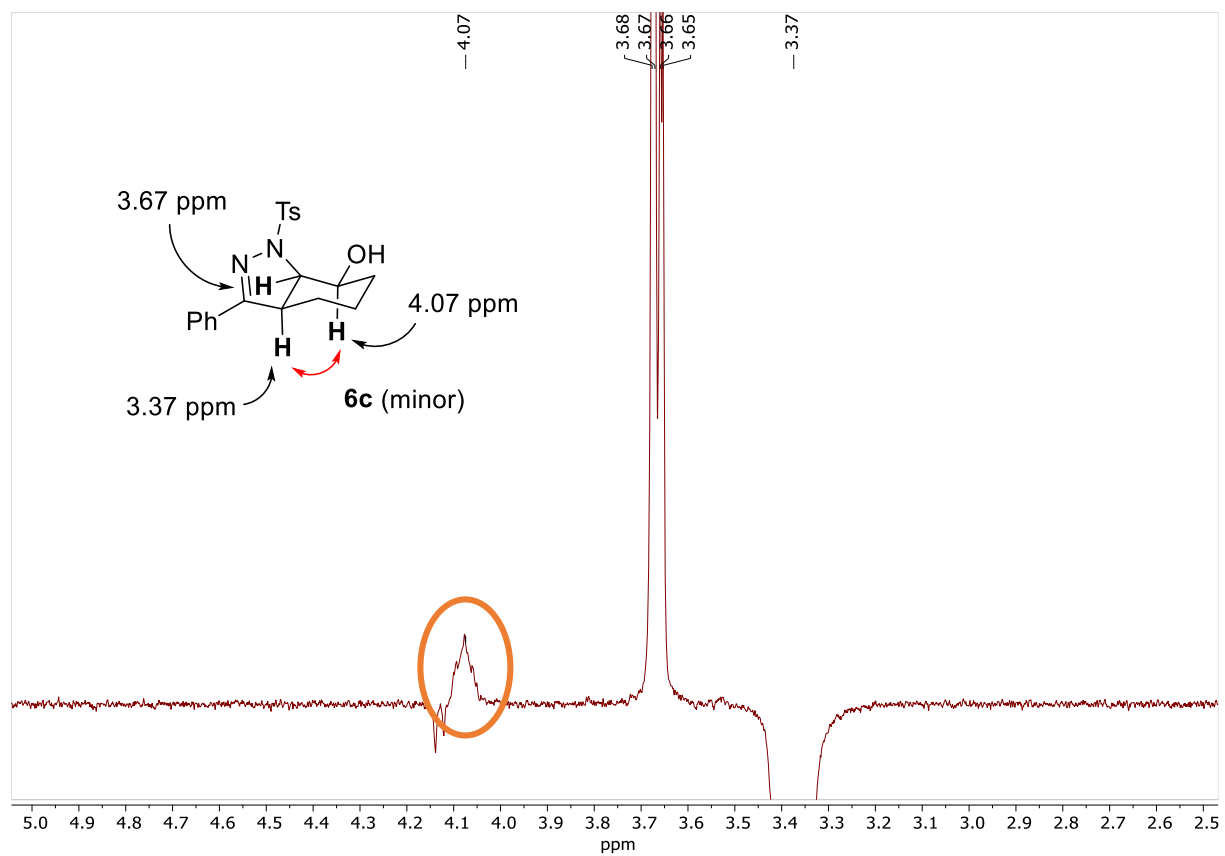

1D NOE NMR (500 MHz, CDCl<sub>3</sub>) of **6c** (minor diastereomer) irradiated at 4.07 ppm.

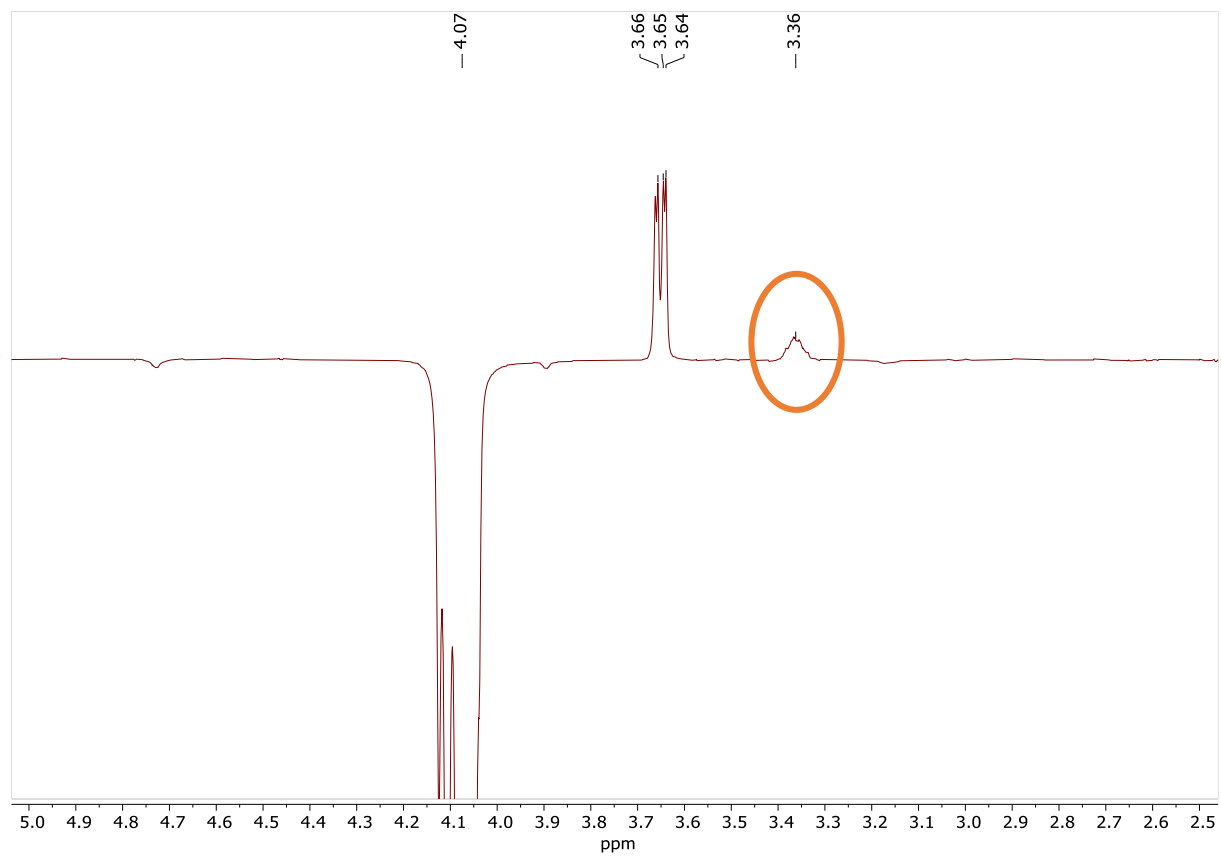

<sup>1</sup>H NMR, <sup>13</sup>C NMR, 1D NOE spectra of compound **6c** (major diastereomer)

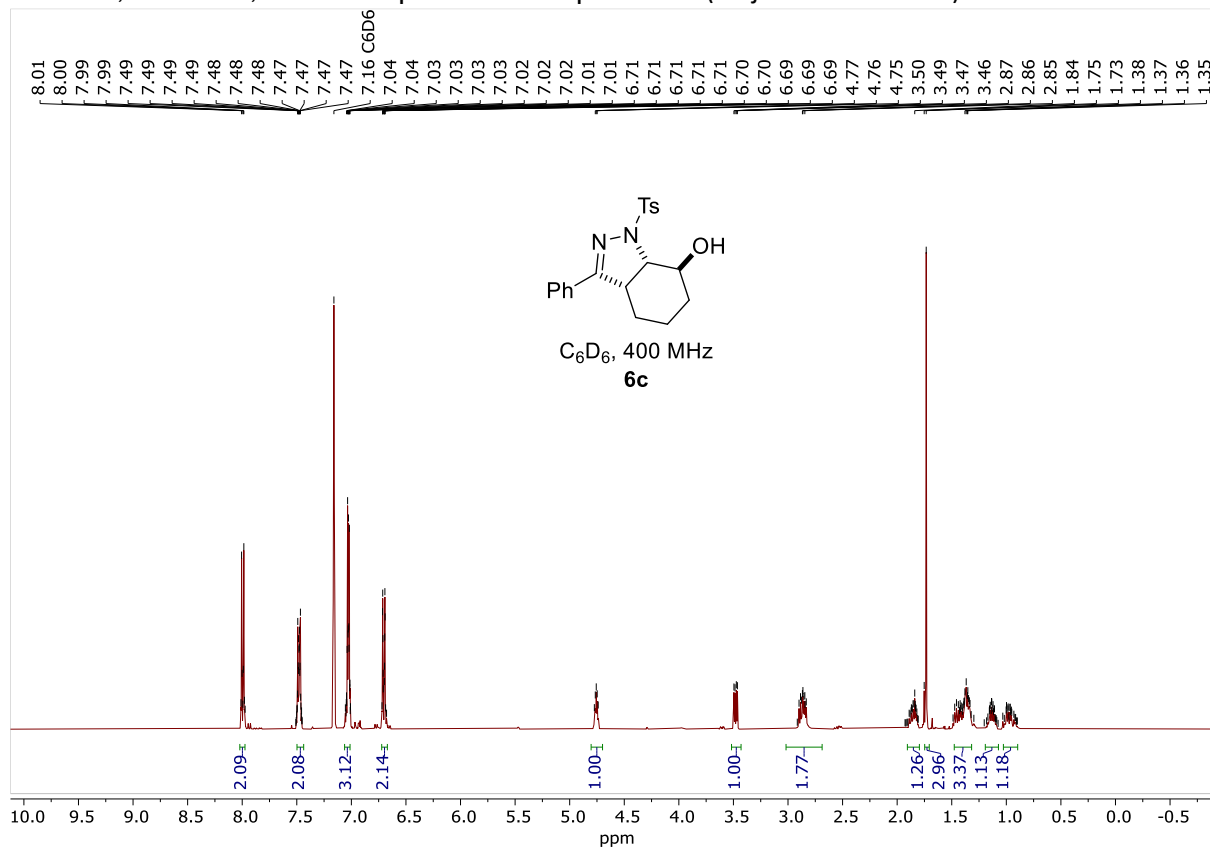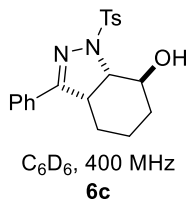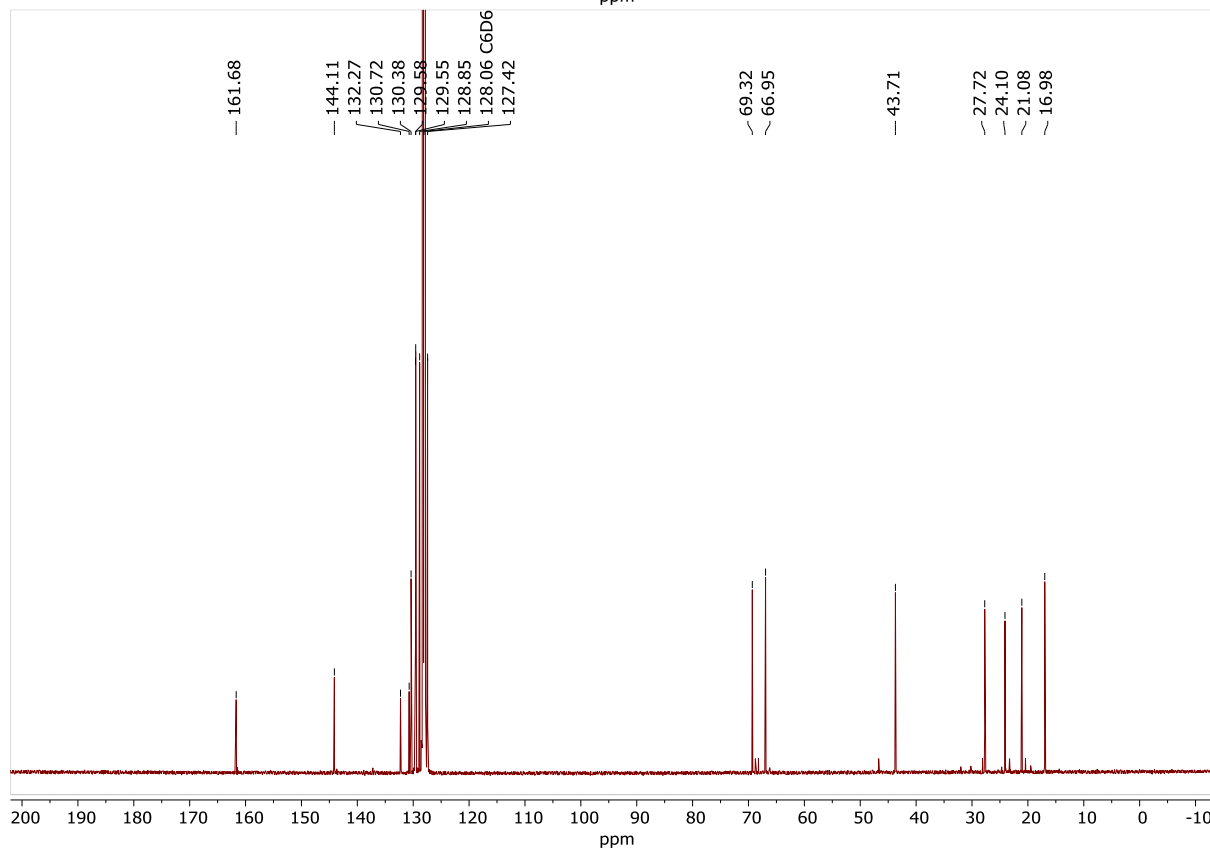

1D NOE NMR (500 MHz, C<sub>6</sub>D<sub>6</sub>) of **6c** (major diastereomer) irradiated at 2.86 ppm.

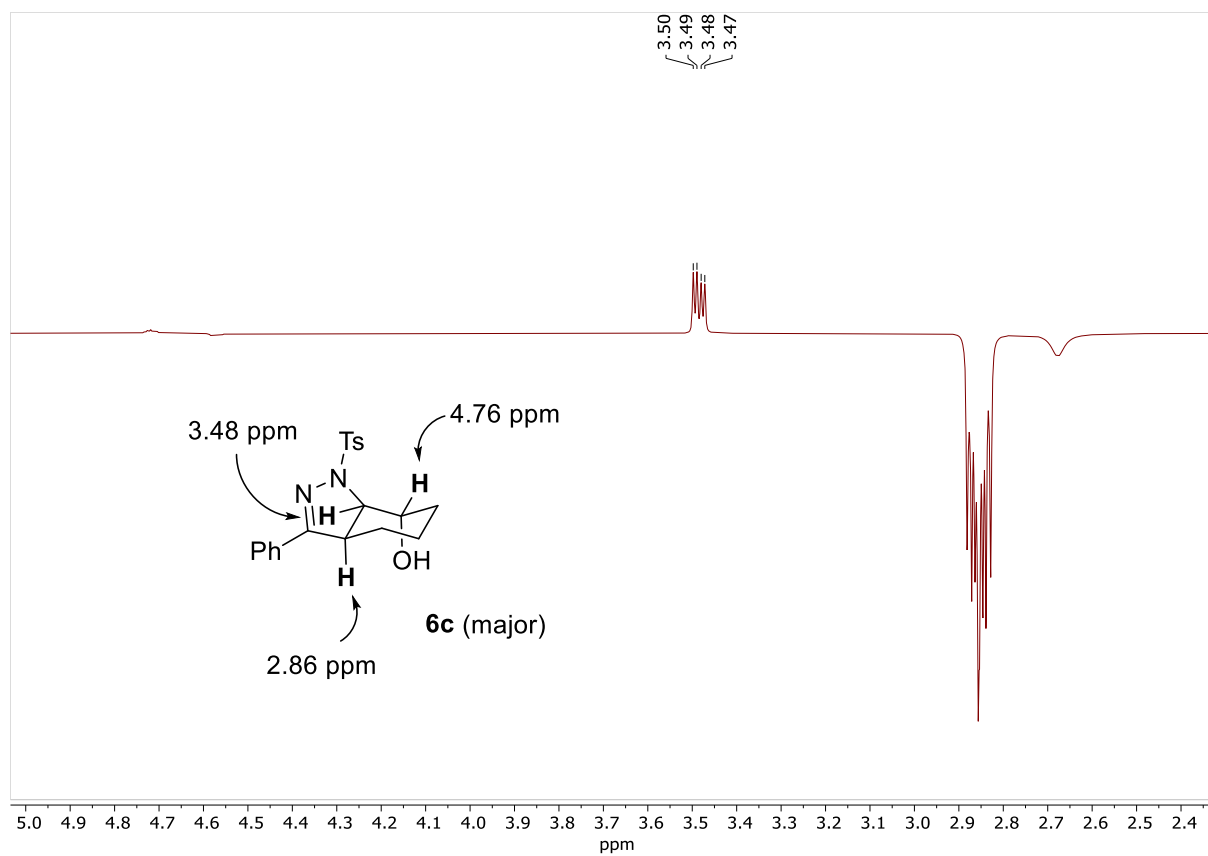

1D NOE NMR (500 MHz, C<sub>6</sub>D<sub>6</sub>) of **6c** (major diastereomer) irradiated at 4.76 ppm.

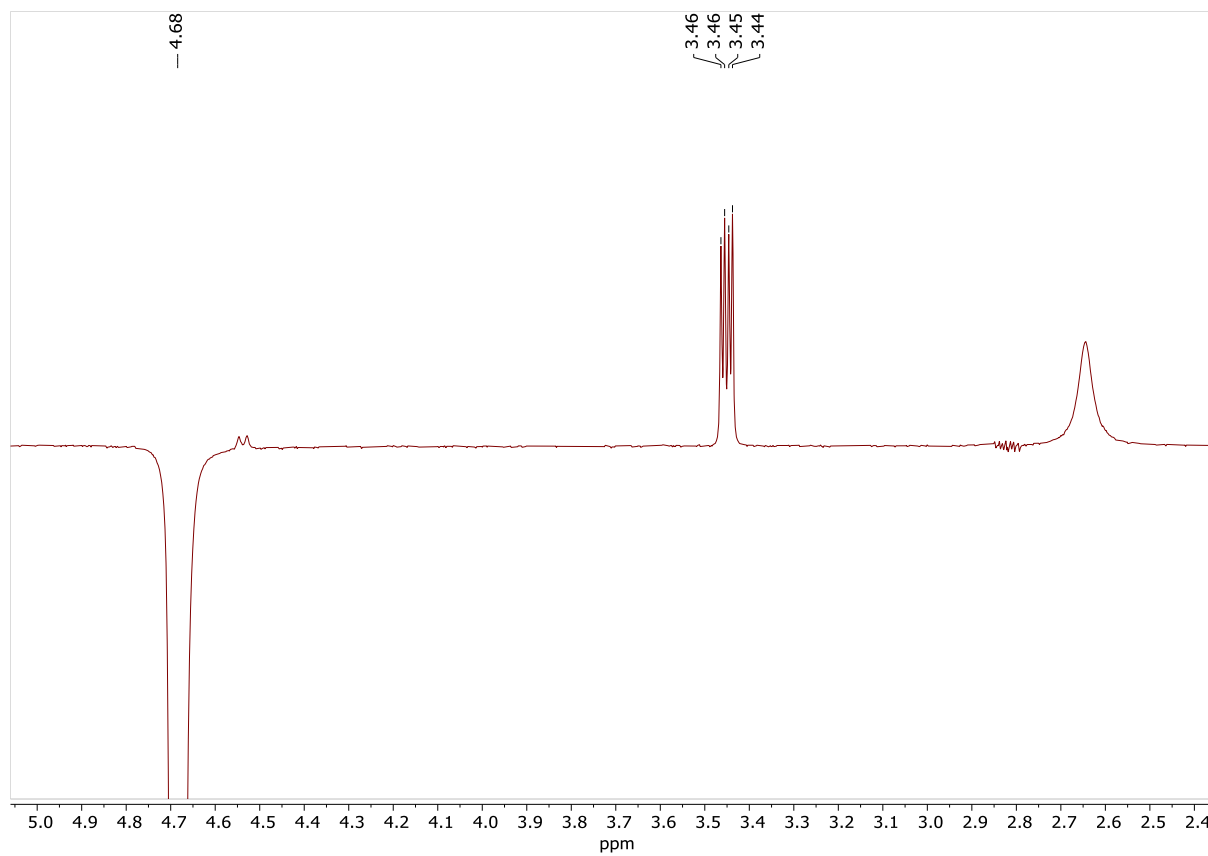

<sup>1</sup>H NMR and <sup>13</sup>C NMR spectrum of compound **8a**

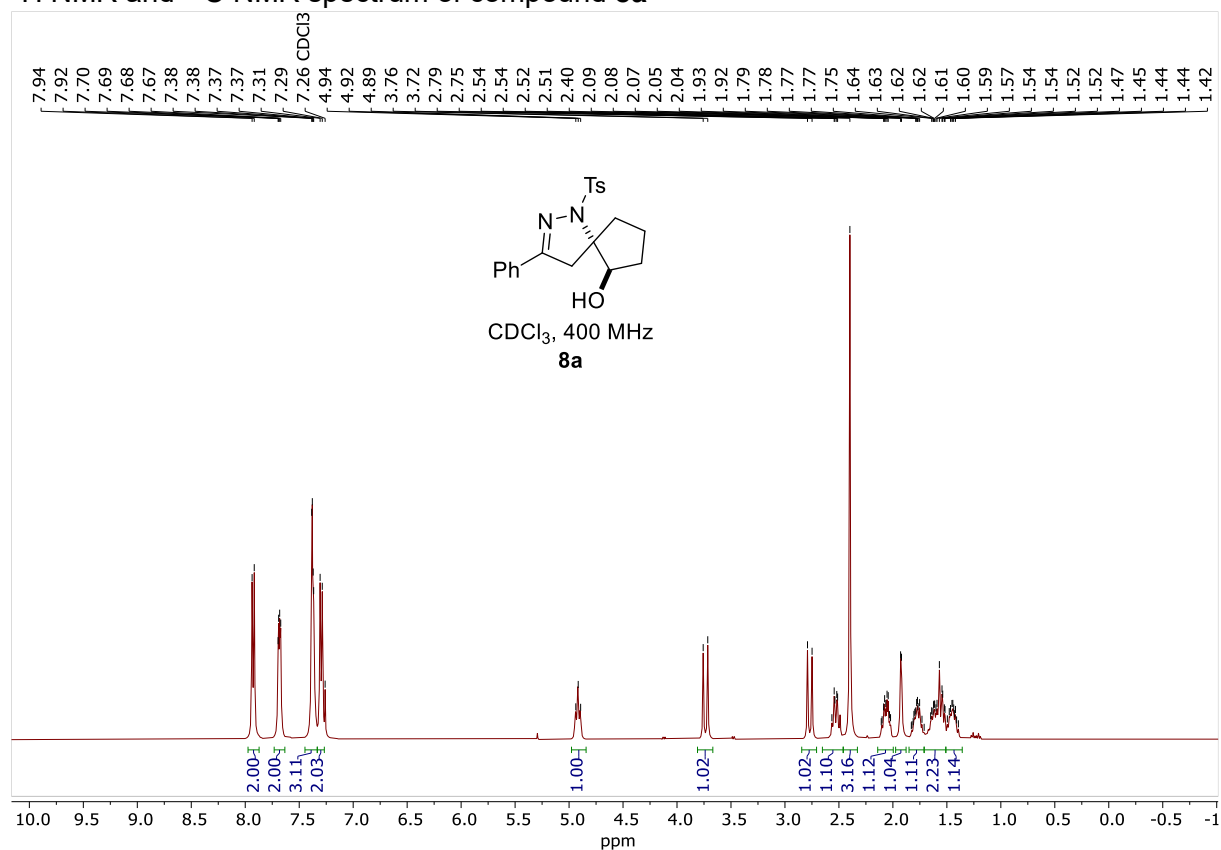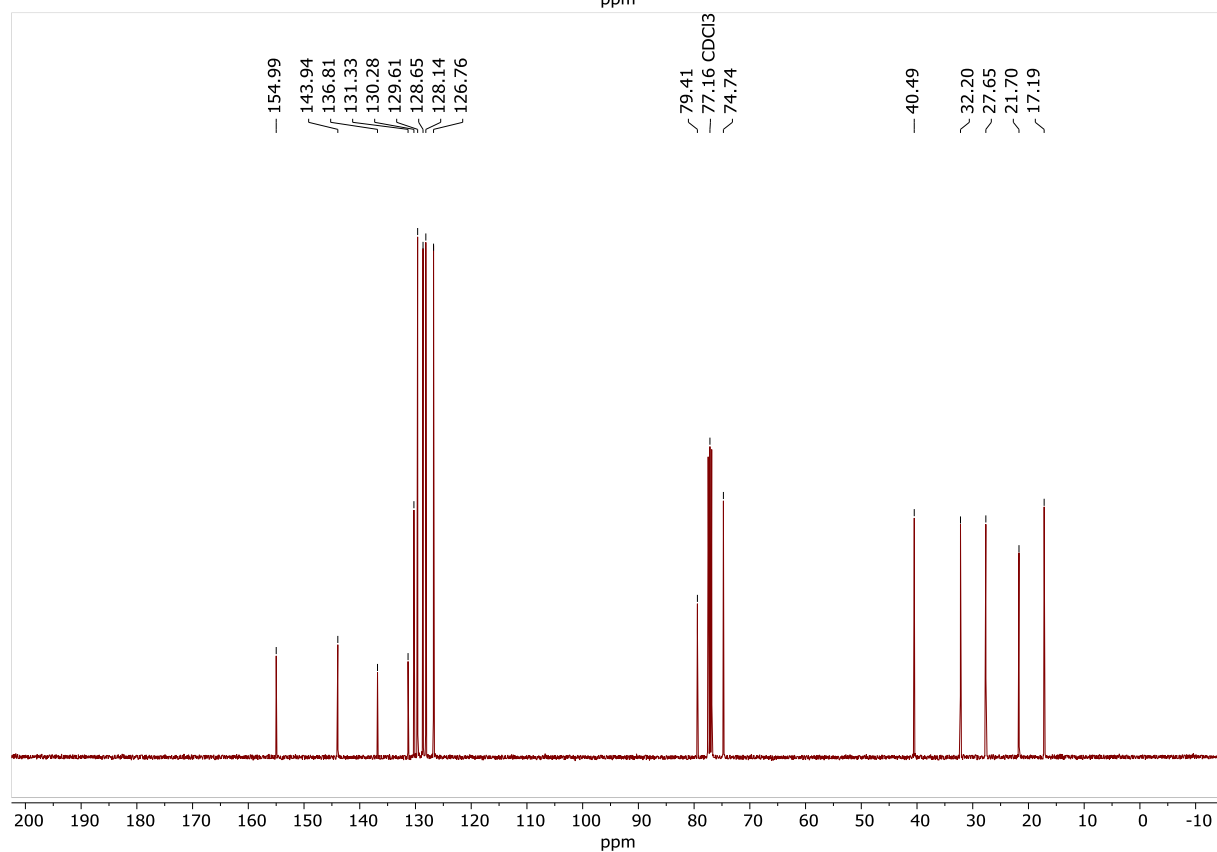

<sup>1</sup>H NMR and <sup>13</sup>C NMR spectrum of compound **8b**

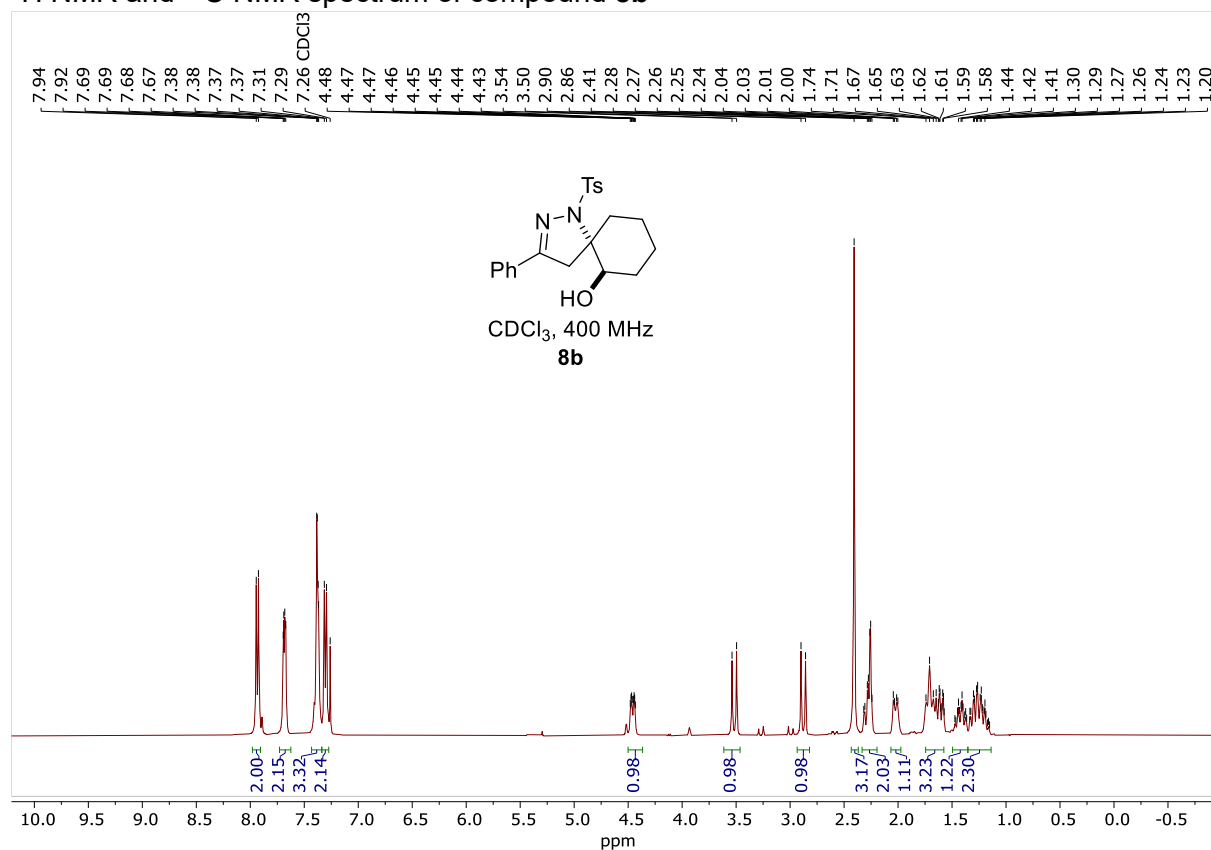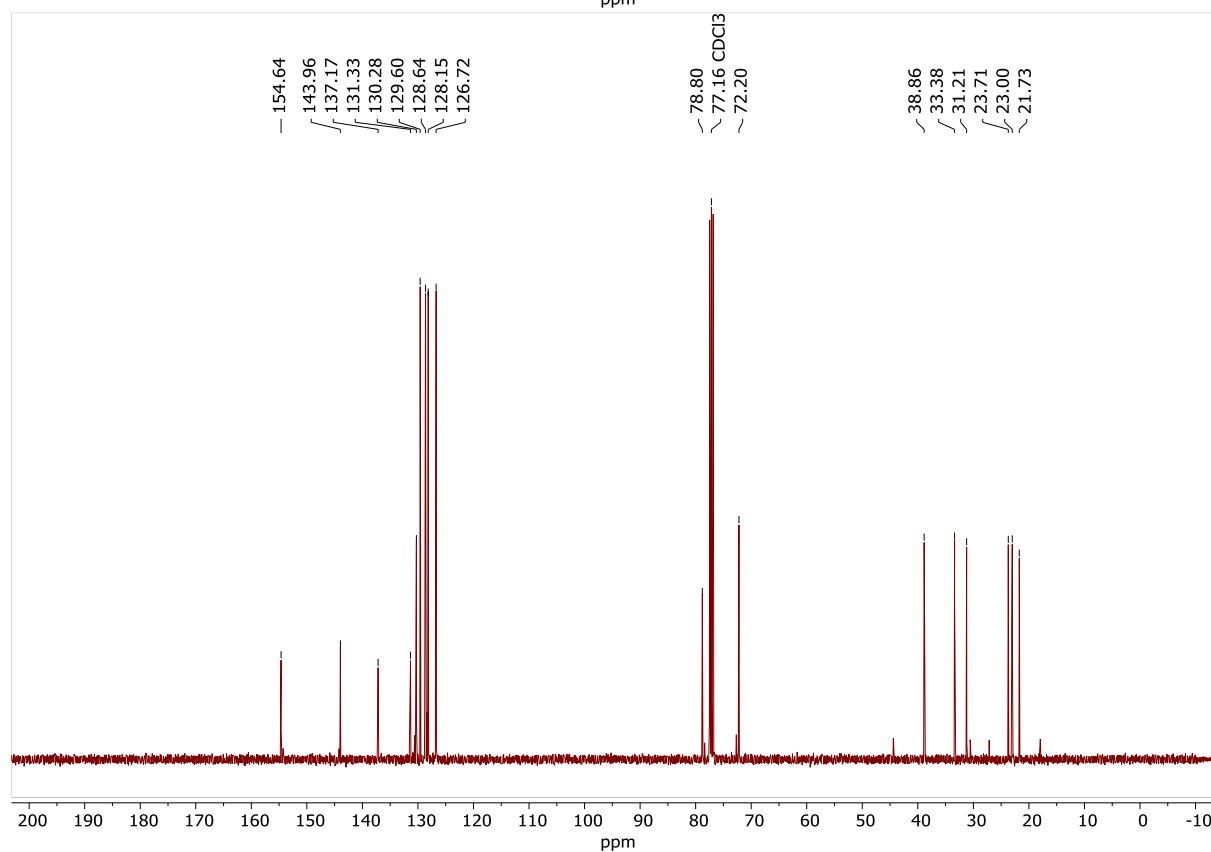

<sup>1</sup>H NMR and <sup>13</sup>C NMR spectra of compound **3a**

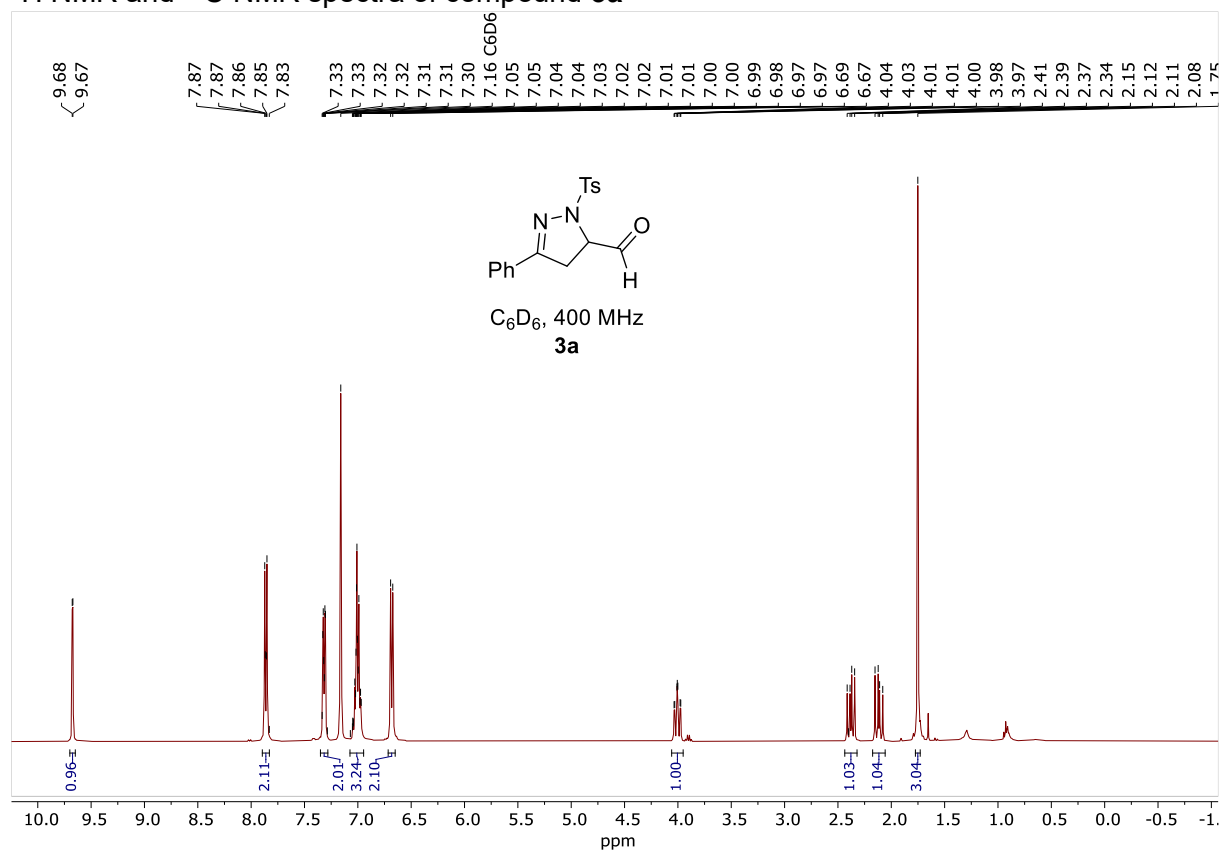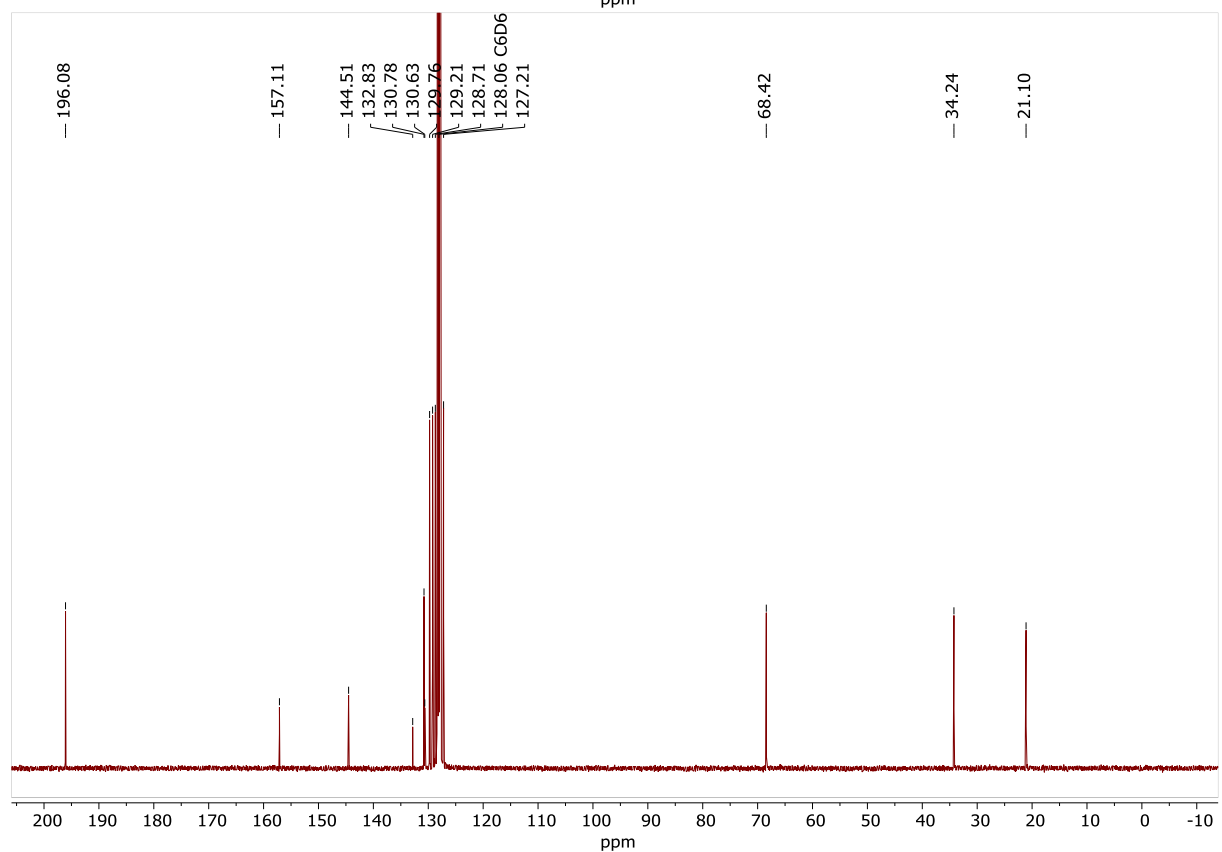

$^1\text{H}$  NMR and  $^{13}\text{C}$  NMR spectrum of compound **3a** in  $\text{CDCl}_3$

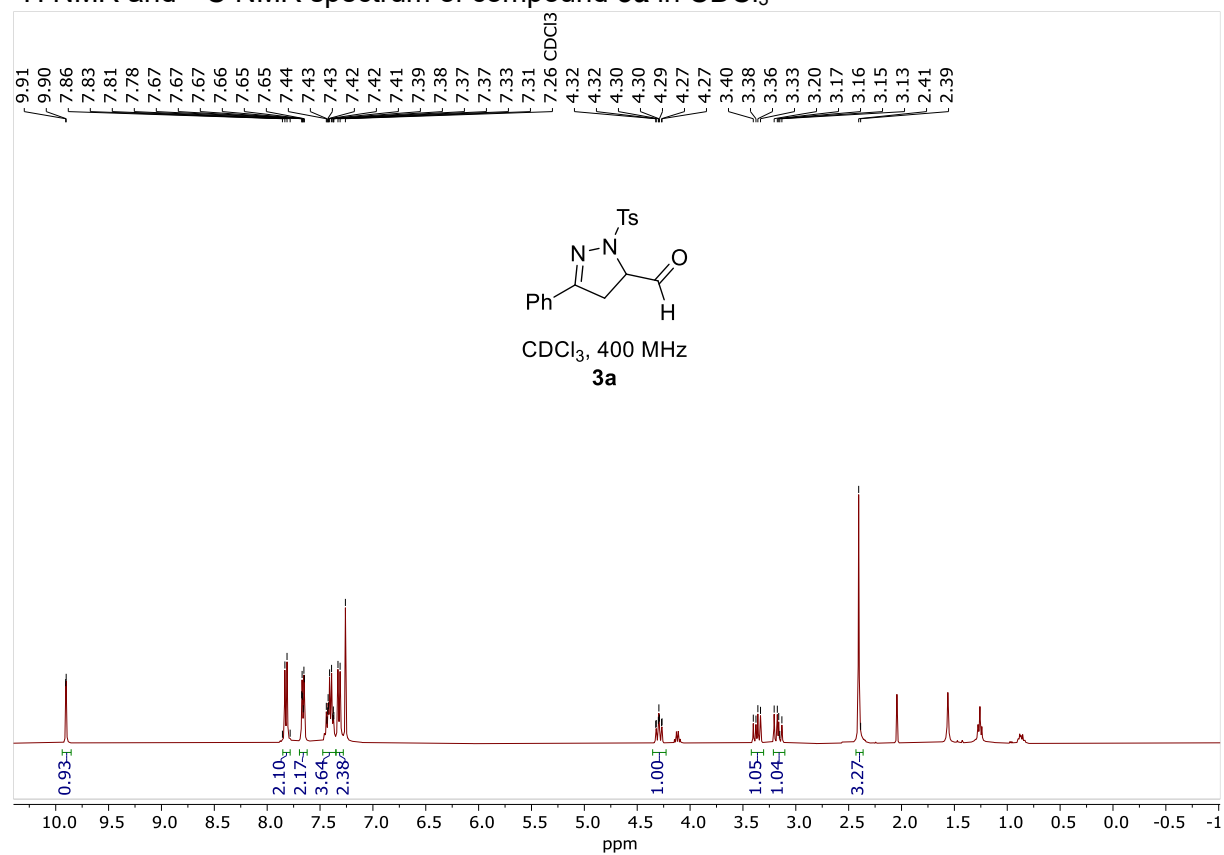

# $^1\text{H}$ NMR and $^{13}\text{C}$ NMR spectrum of compound **3b**

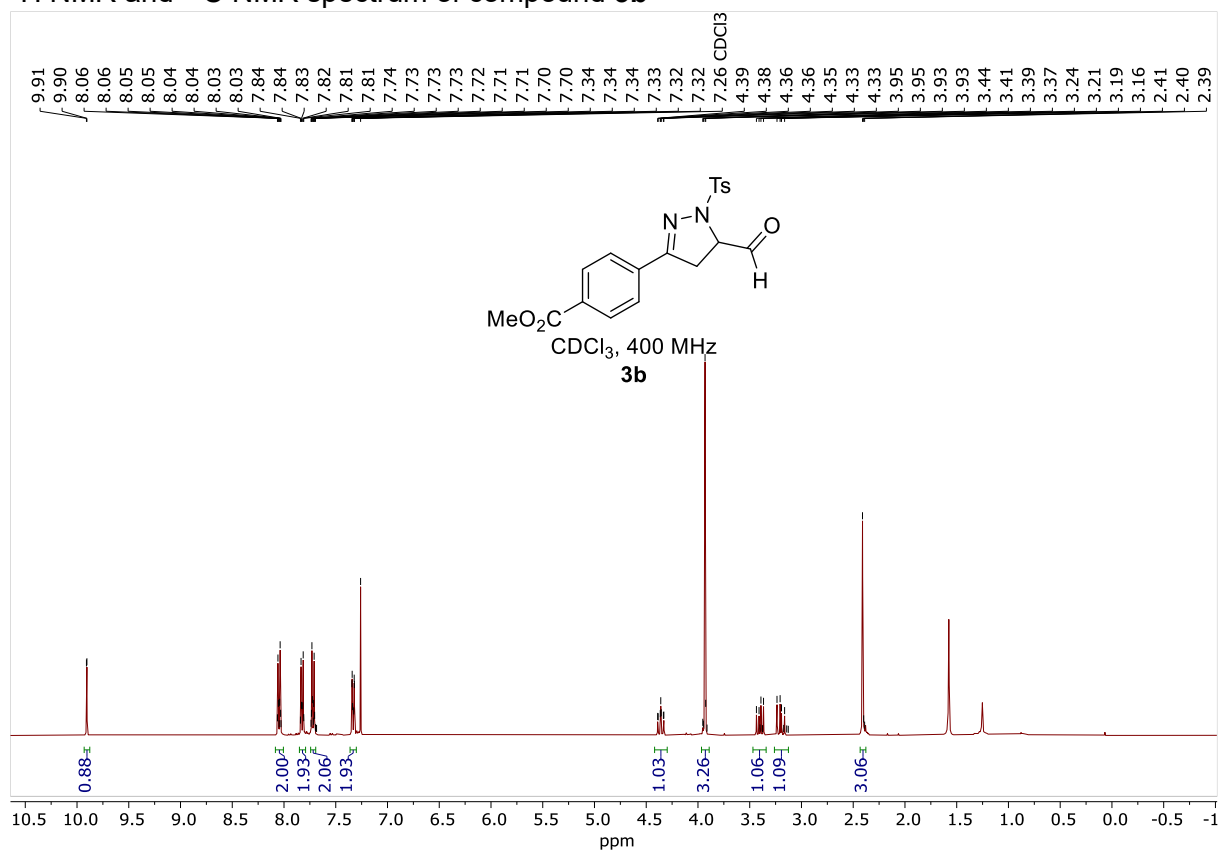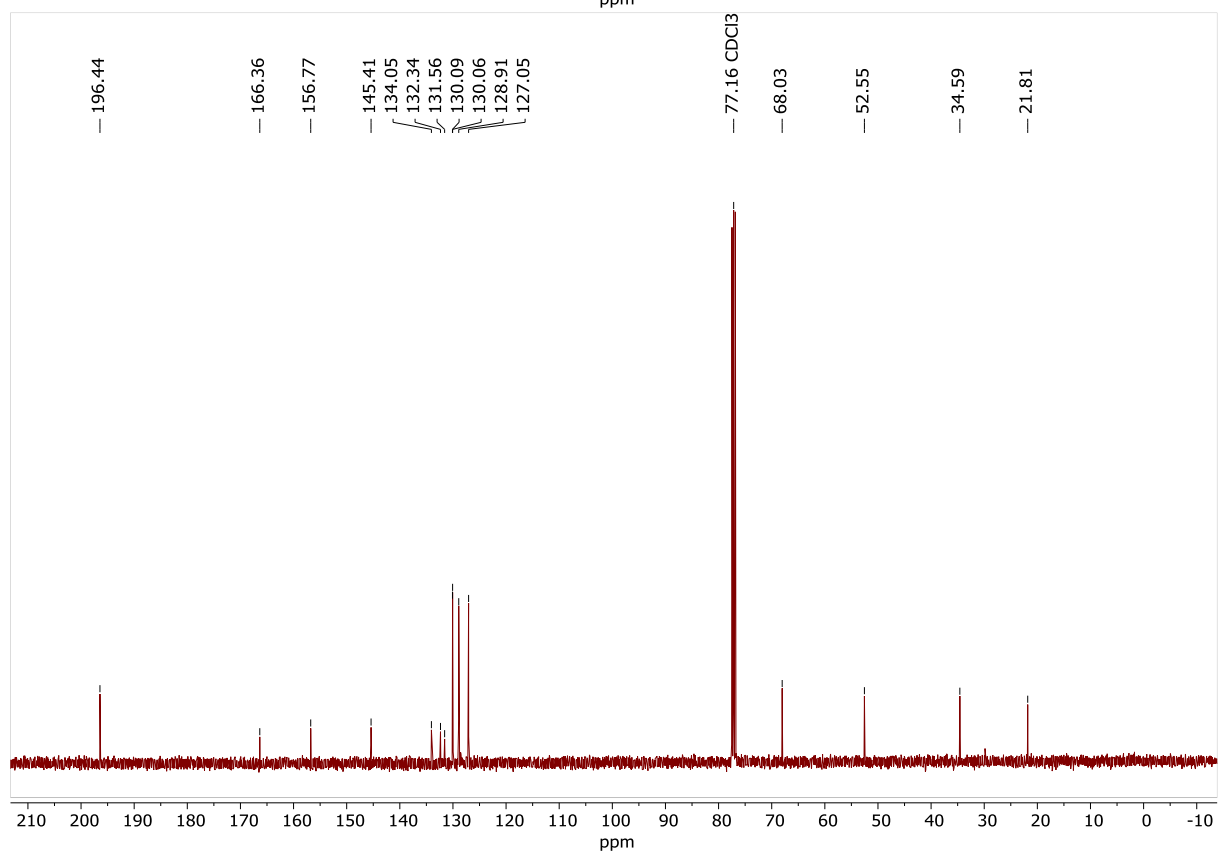



<sup>1</sup>H NMR and <sup>13</sup>C NMR spectrum of compound **3c**

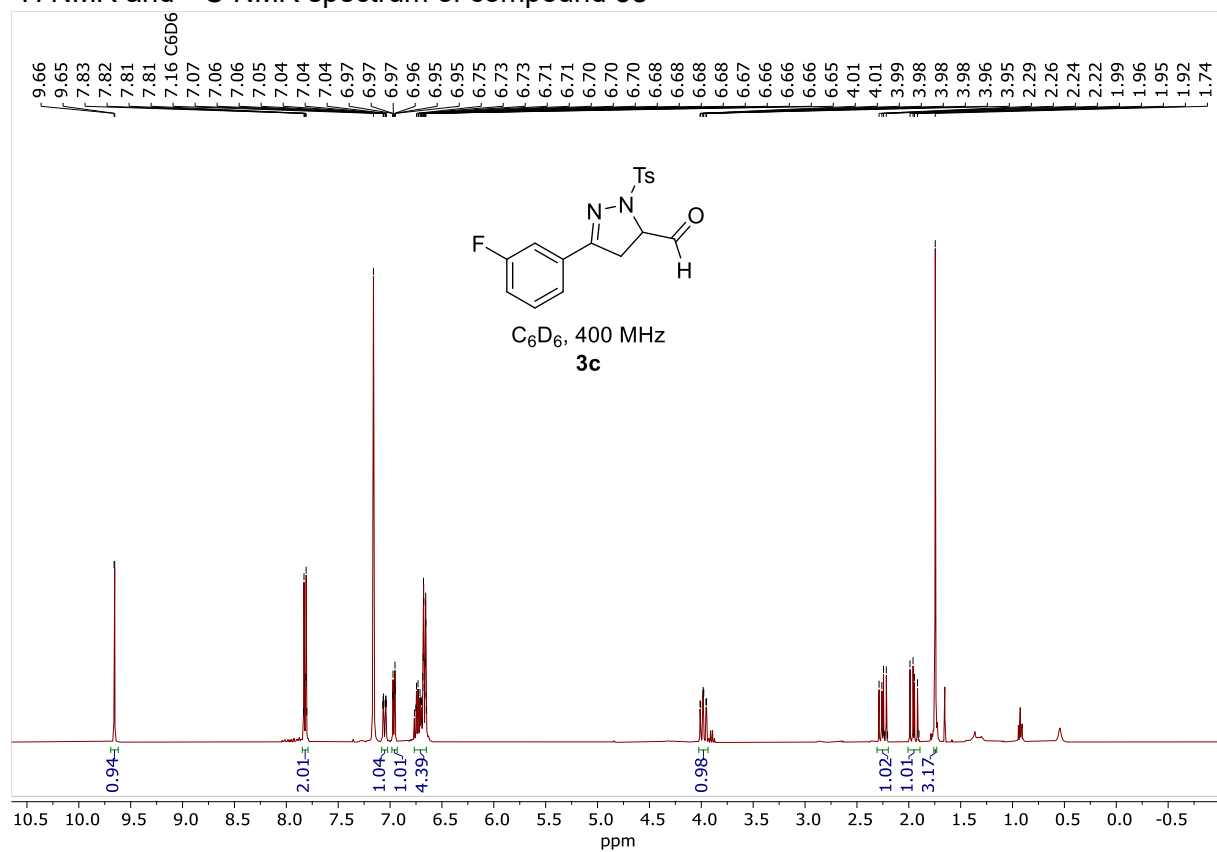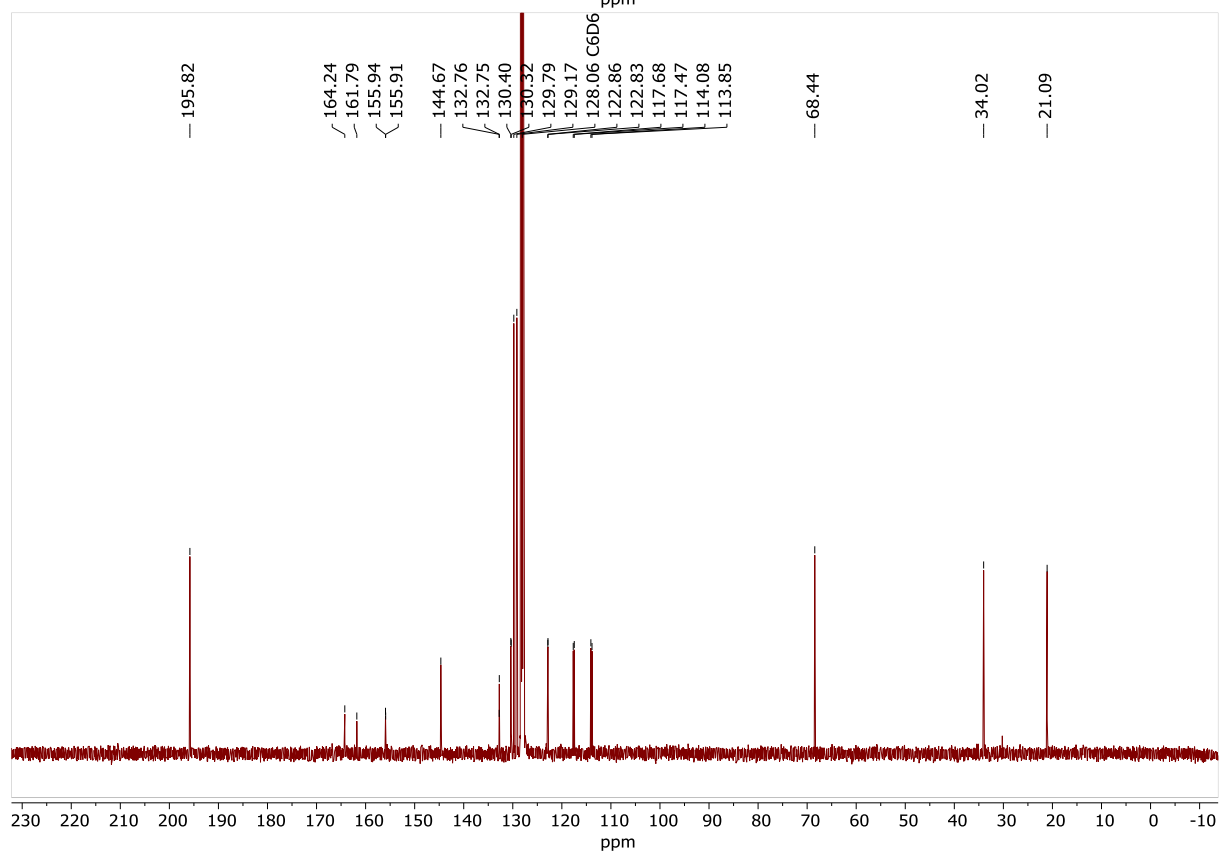

$^1\text{H}$  NMR and  $^{13}\text{C}$  NMR spectrum of compound **3d**

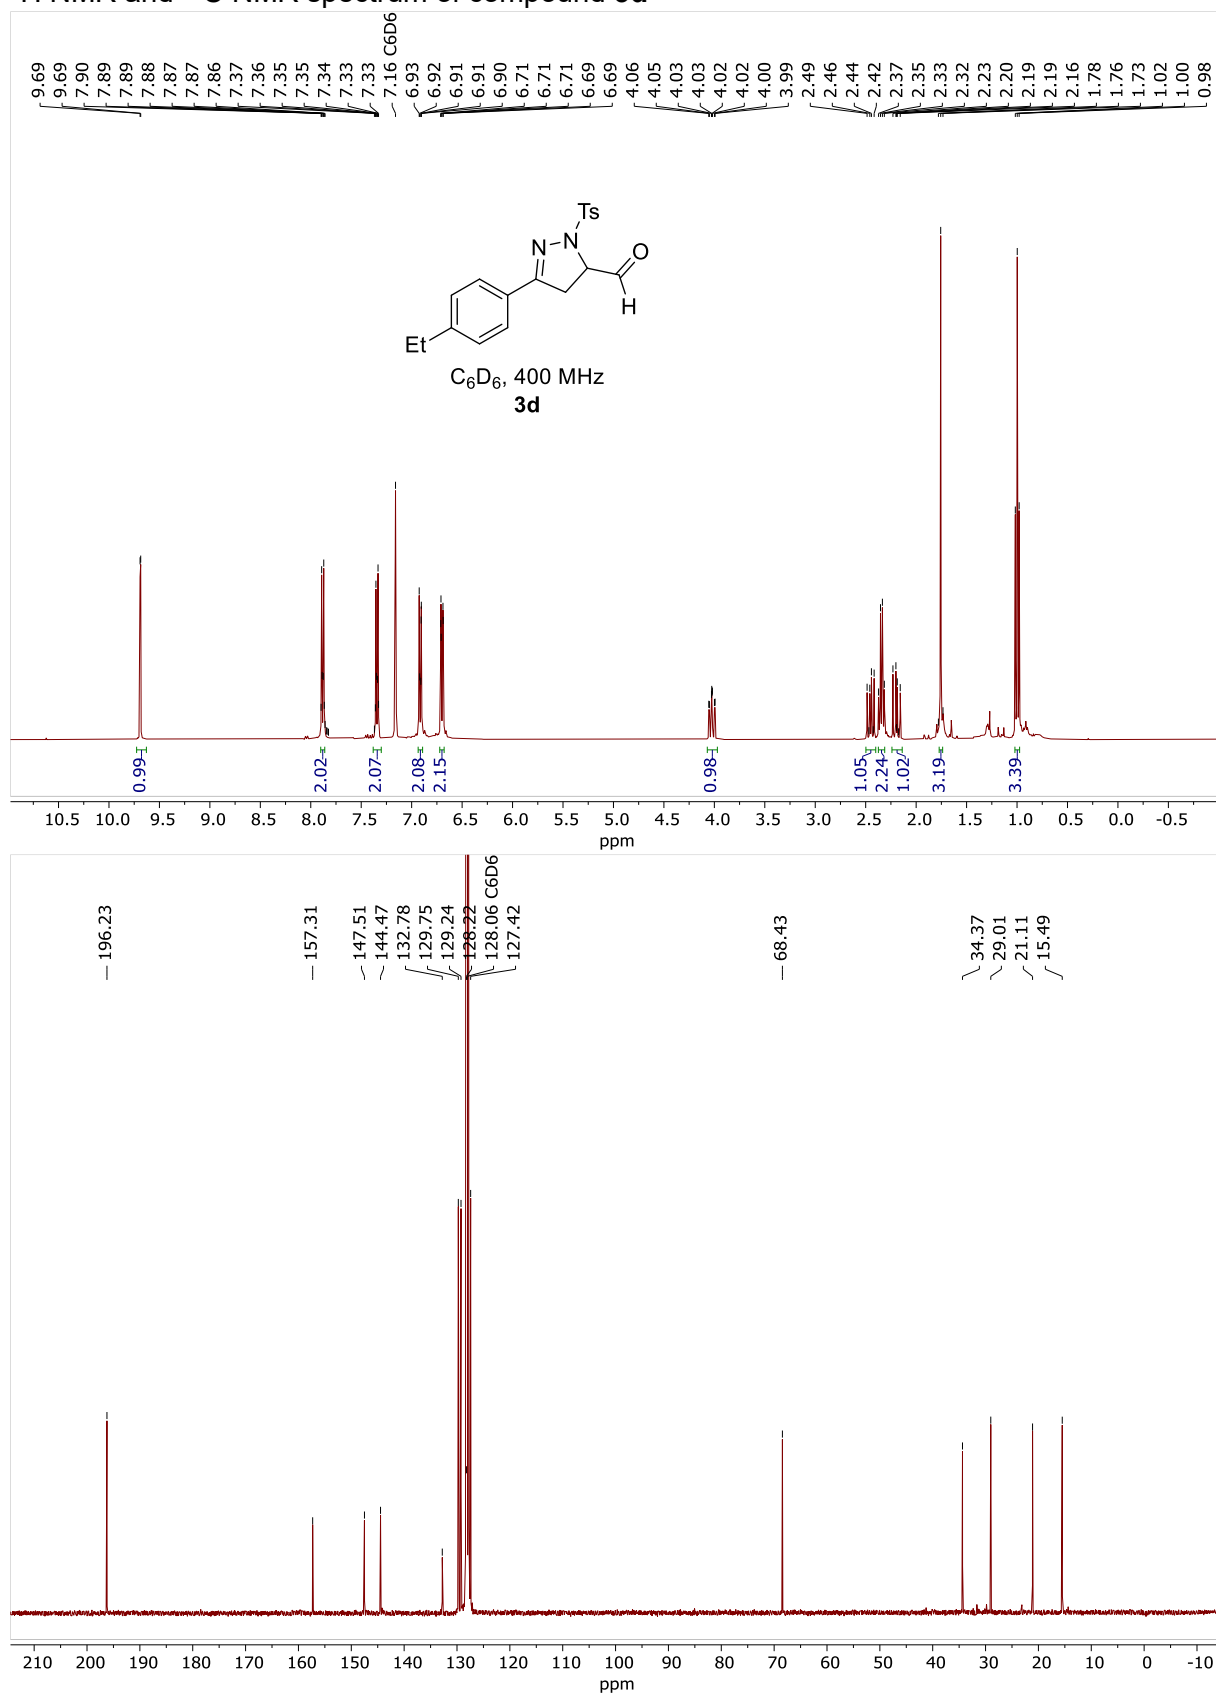

$^1\text{H}$  NMR and  $^{13}\text{C}$  NMR spectrum of compound **3e**

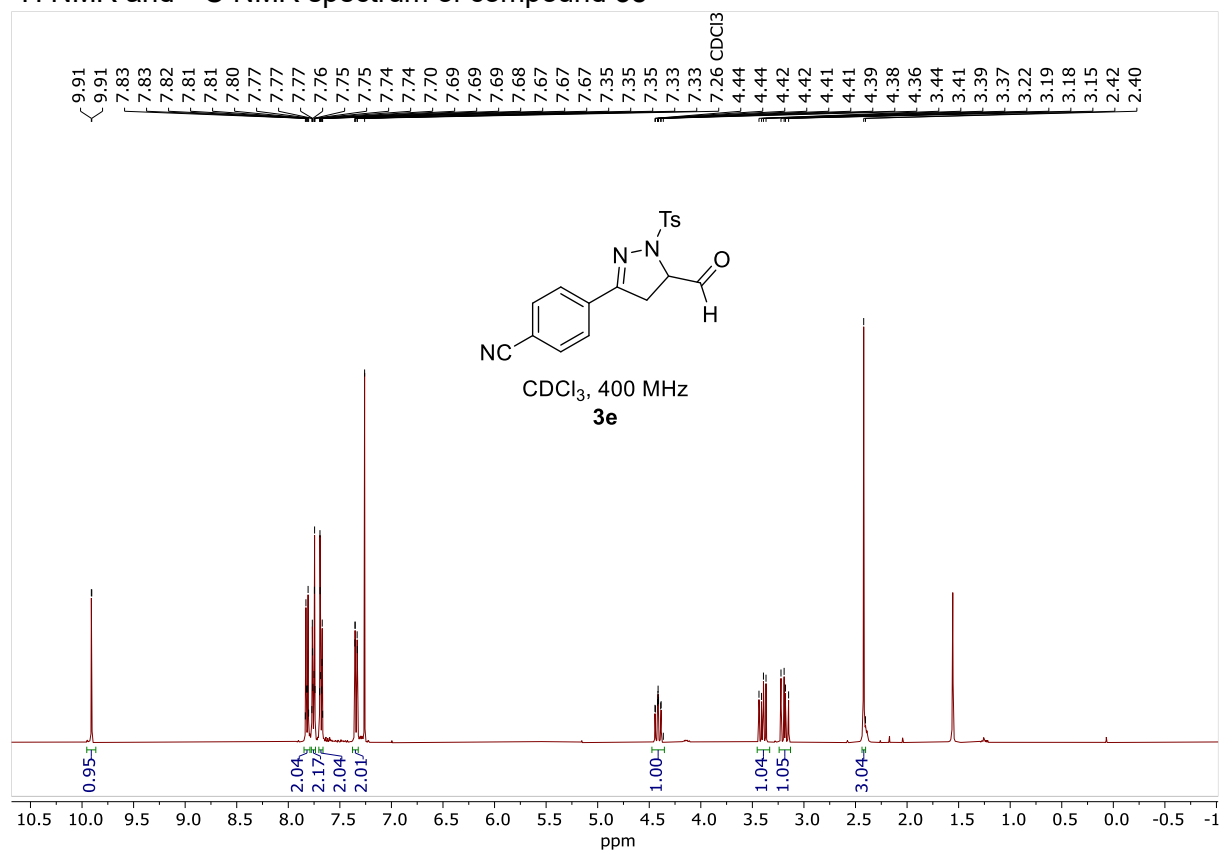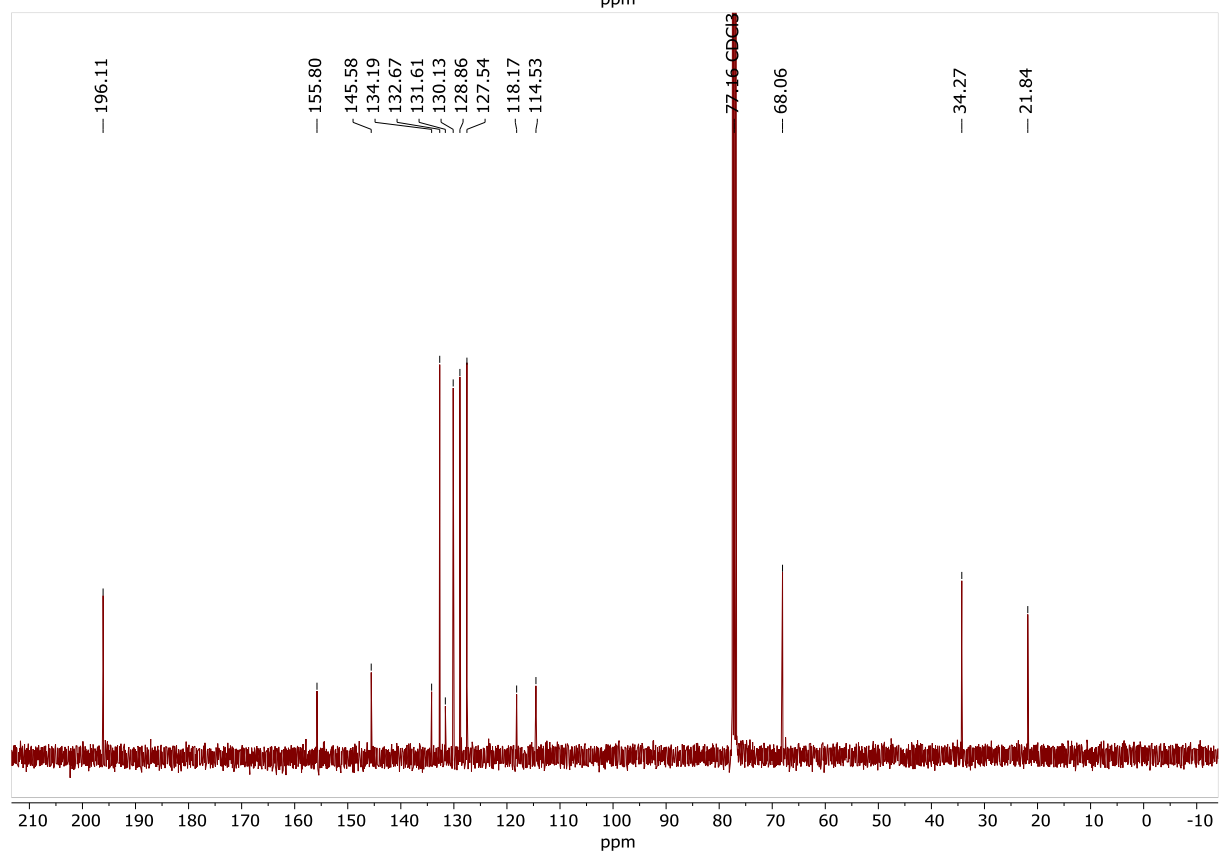

$^1\text{H}$  NMR and  $^{13}\text{C}$  NMR spectrum of compound **3f**

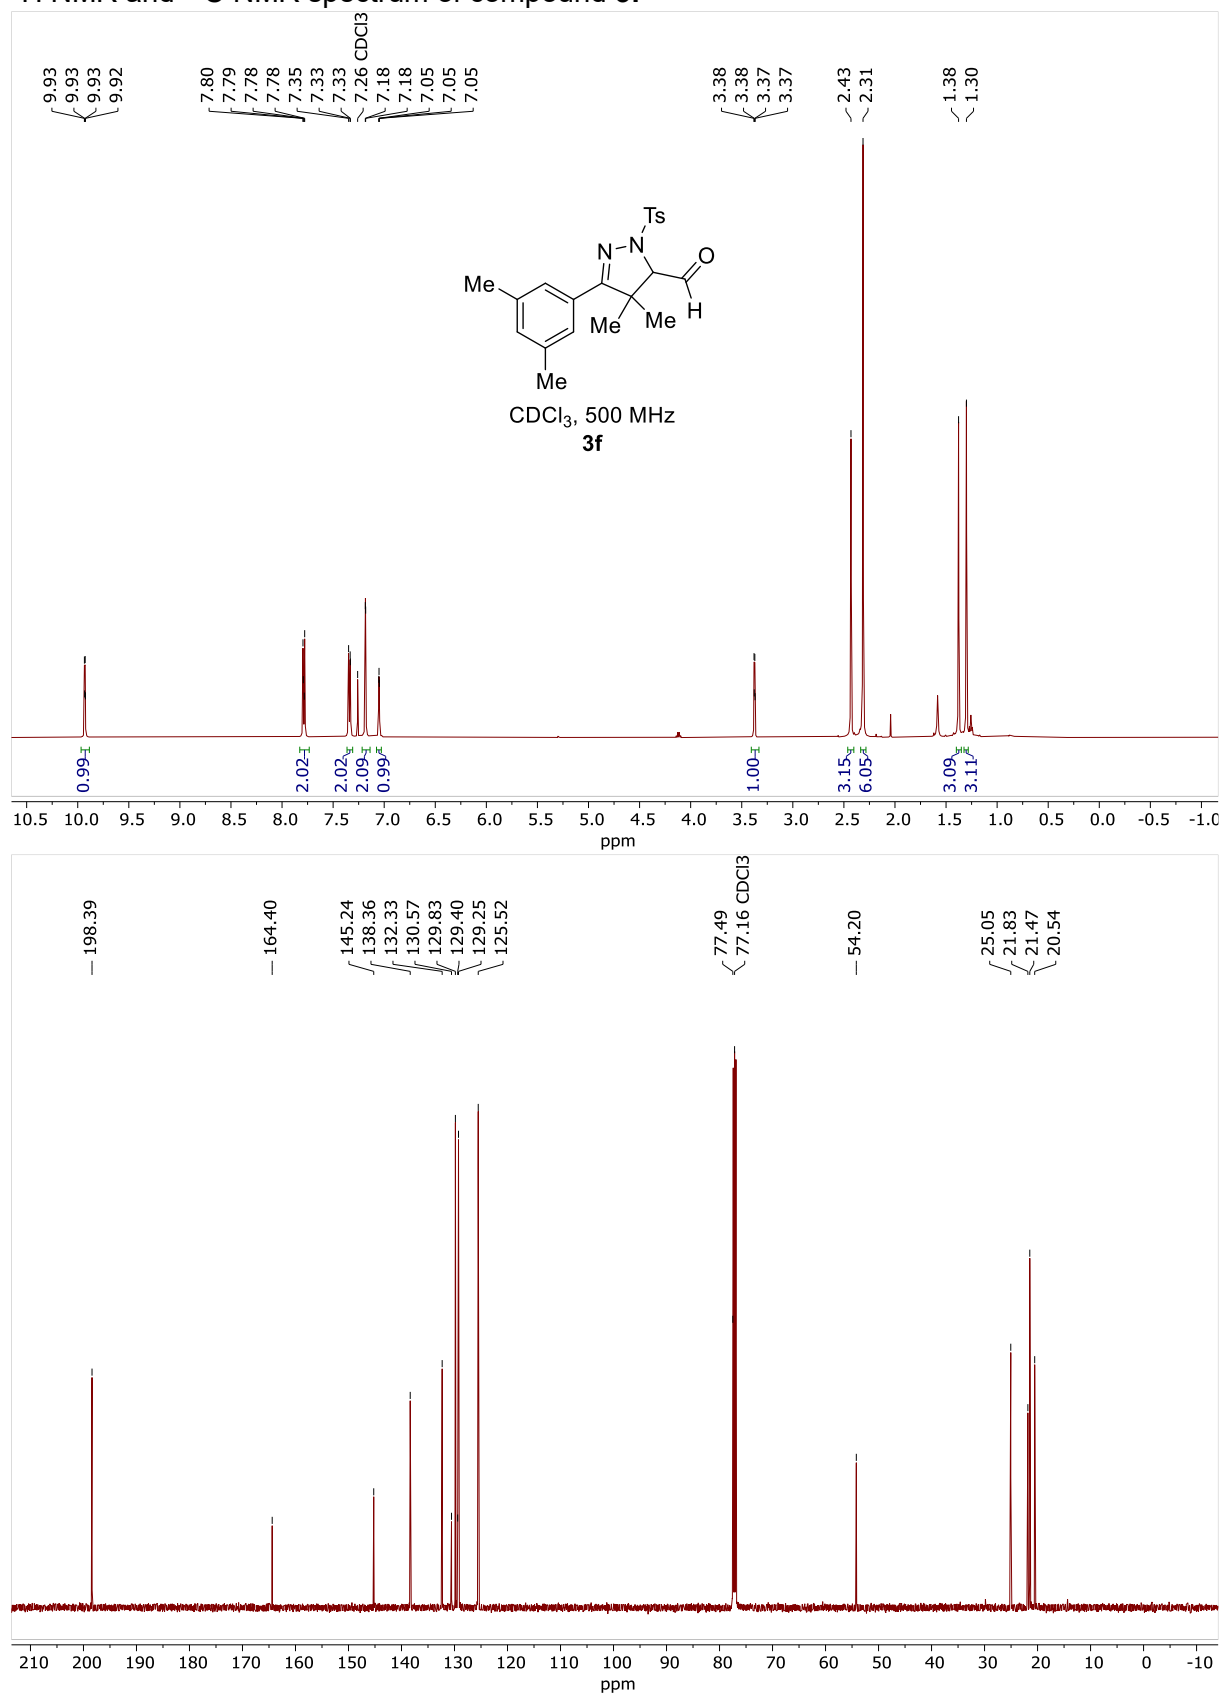

<sup>1</sup>H NMR and <sup>13</sup>C NMR spectrum of compound **3g**

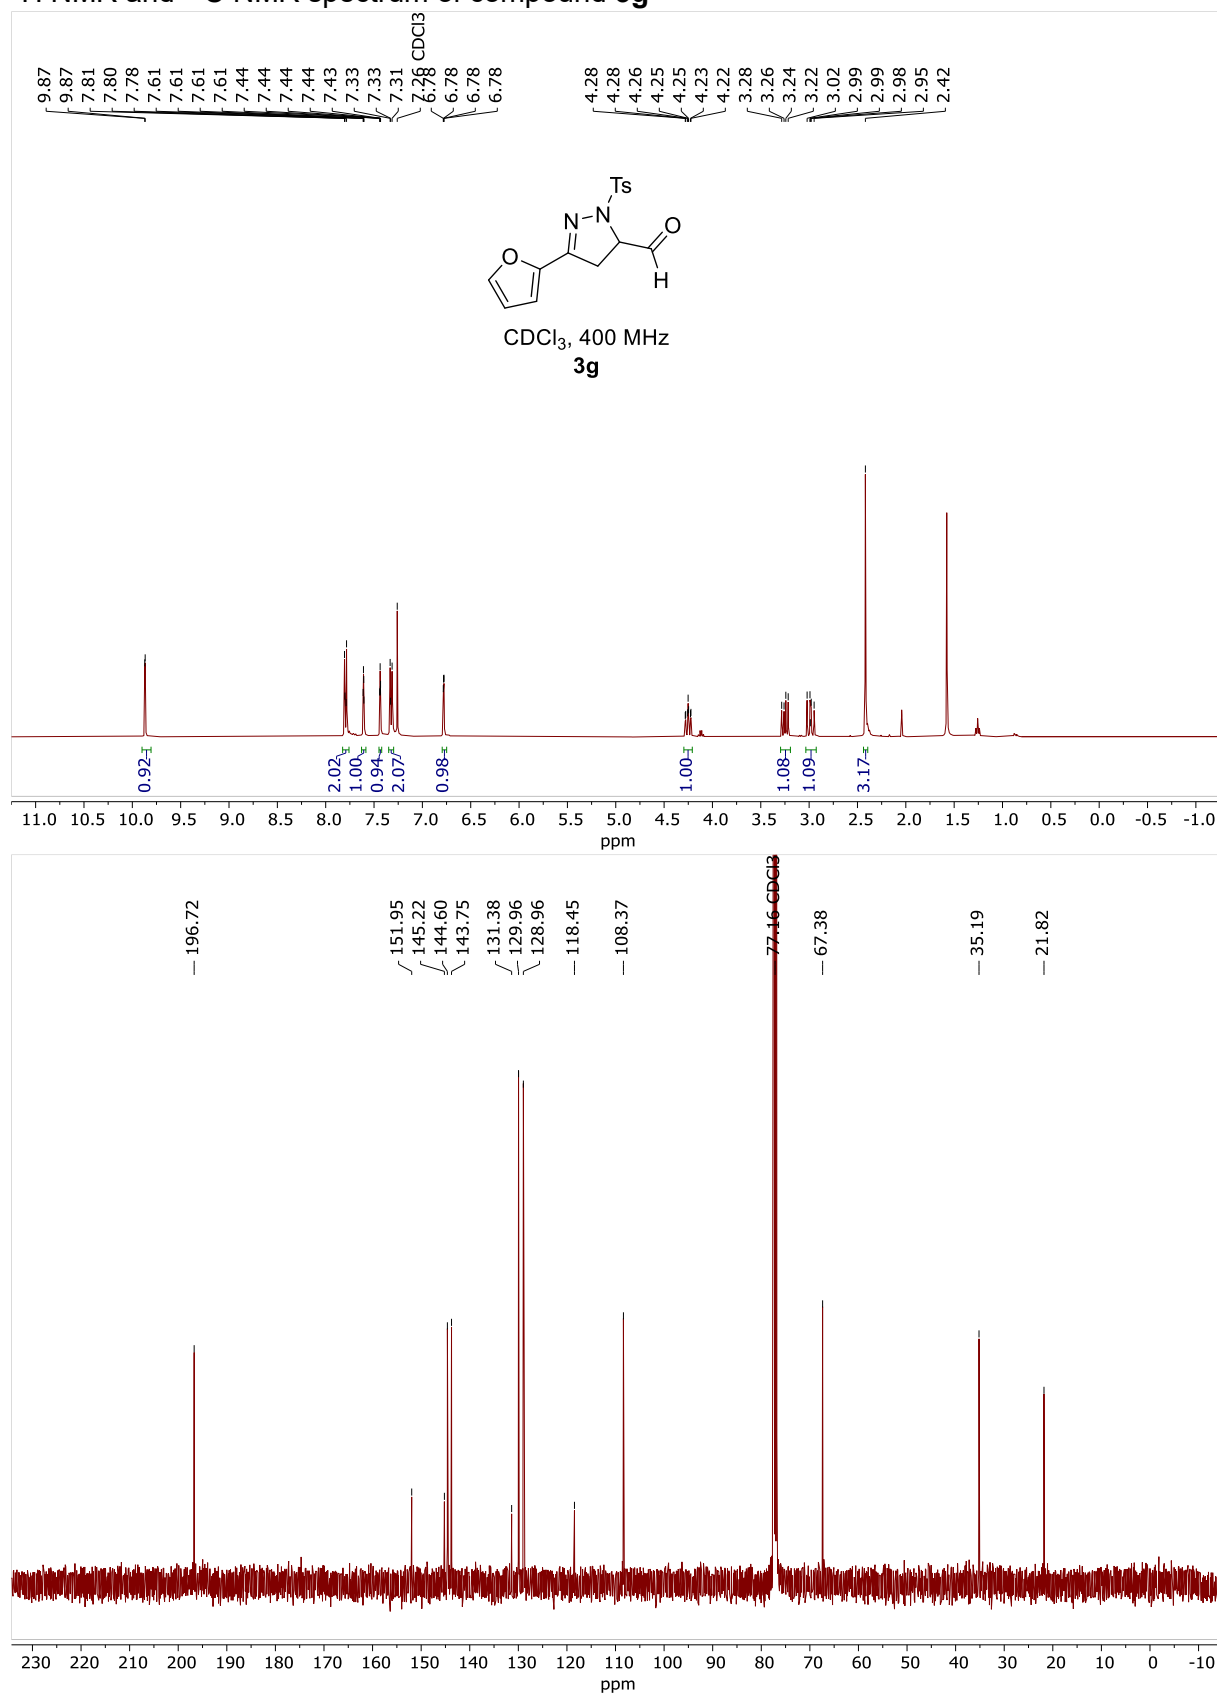

$^1\text{H}$  NMR and  $^{13}\text{C}$  NMR spectrum of compound **3h**

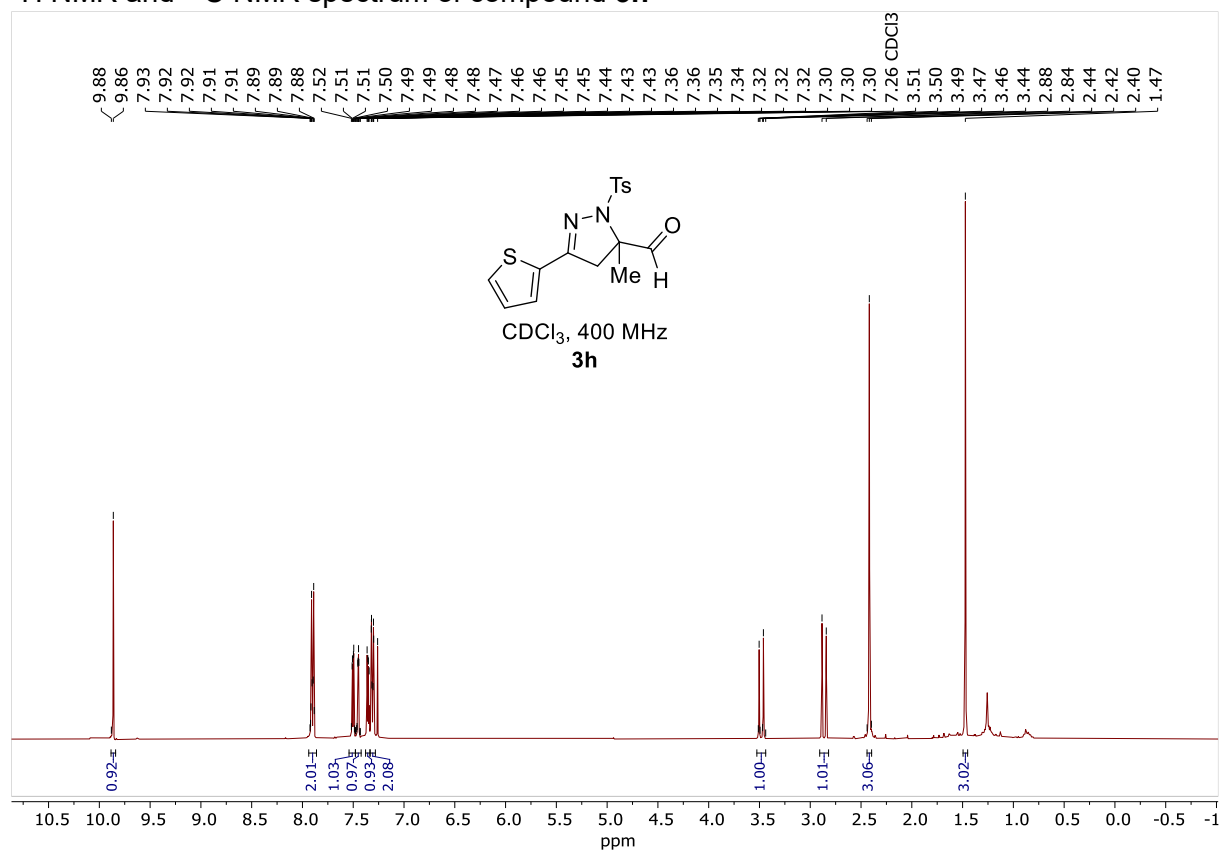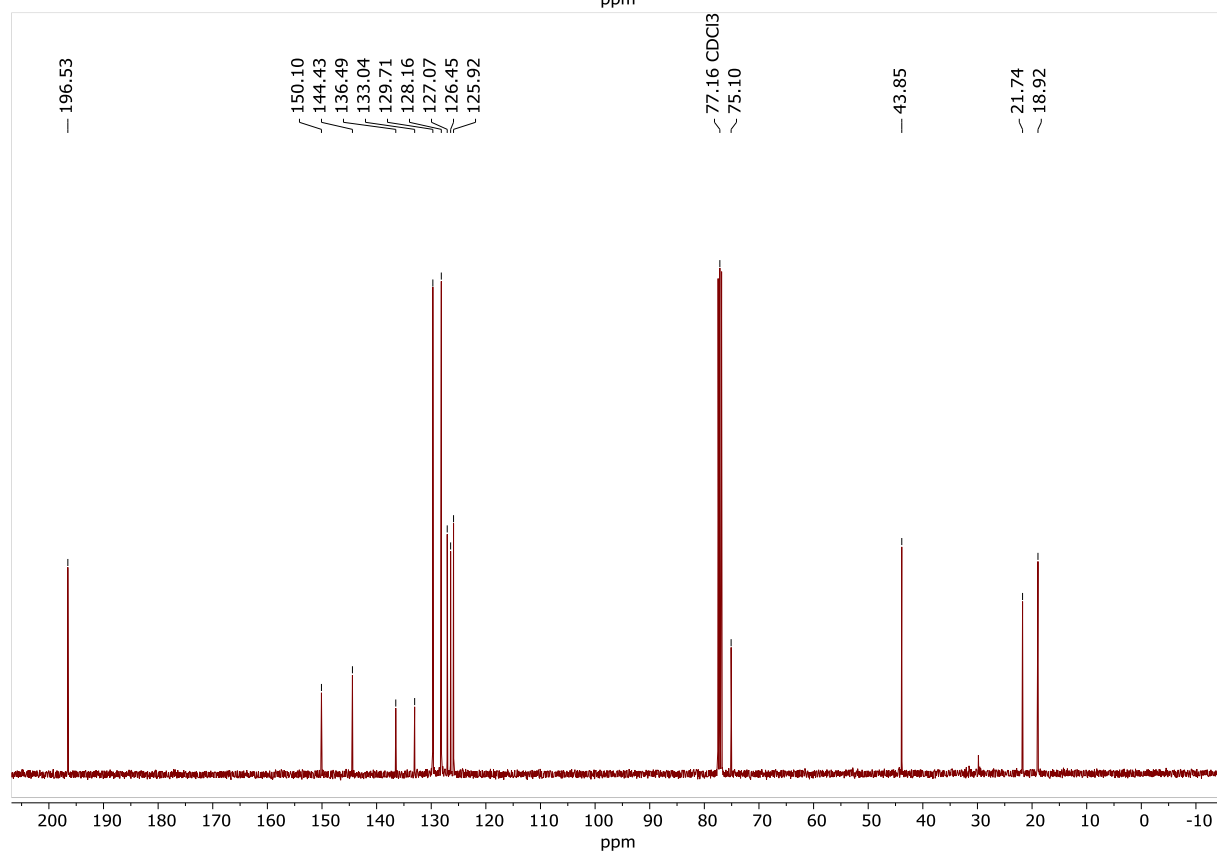

<sup>1</sup>H NMR and <sup>13</sup>C NMR spectrum of compound **3i**

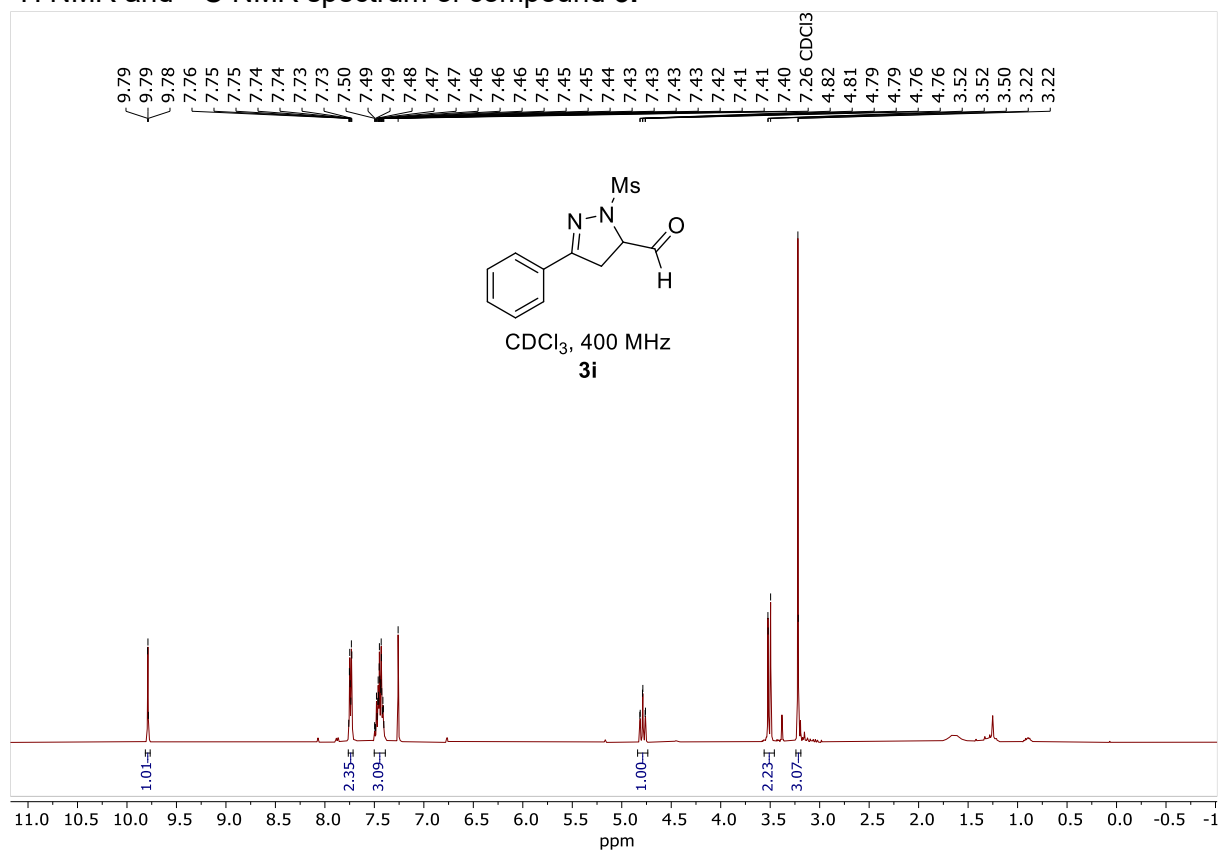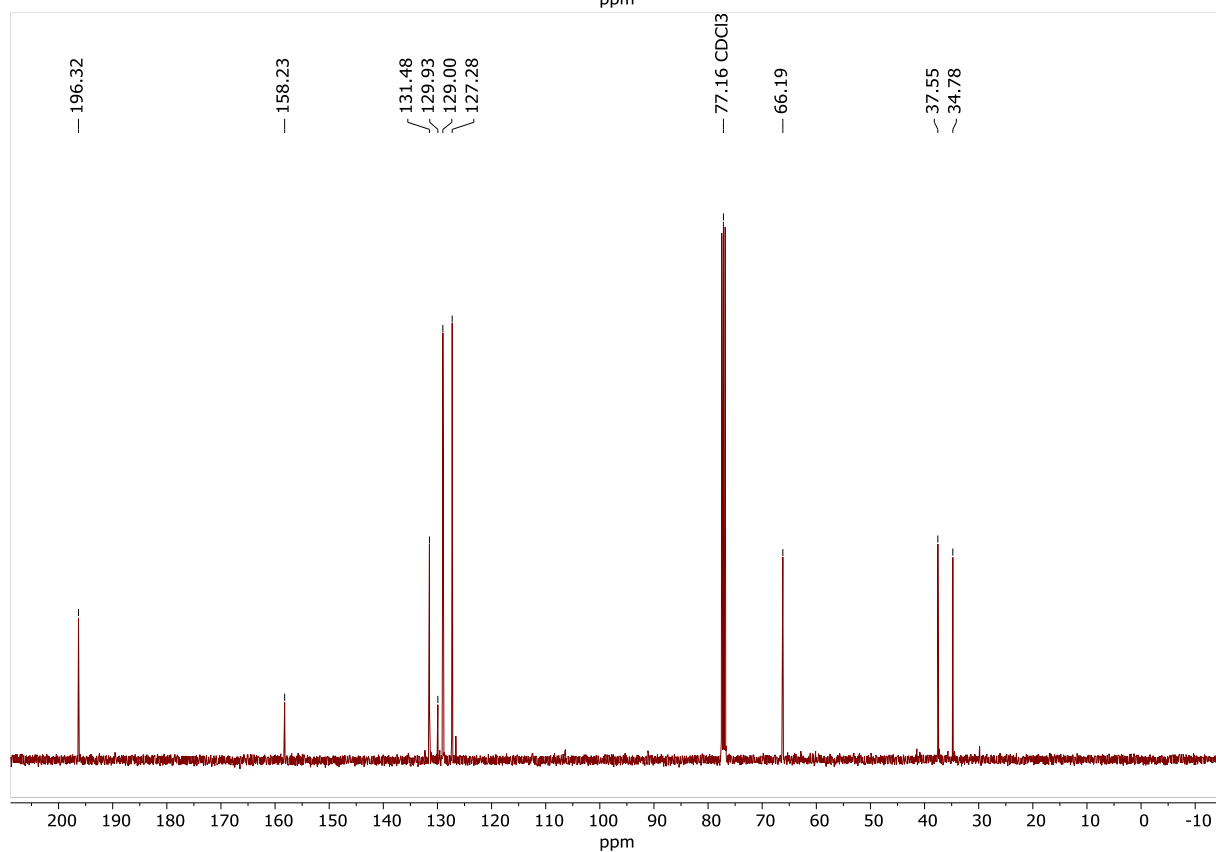

# <sup>1</sup>H NMR and <sup>13</sup>C NMR spectrum of compound **3j**

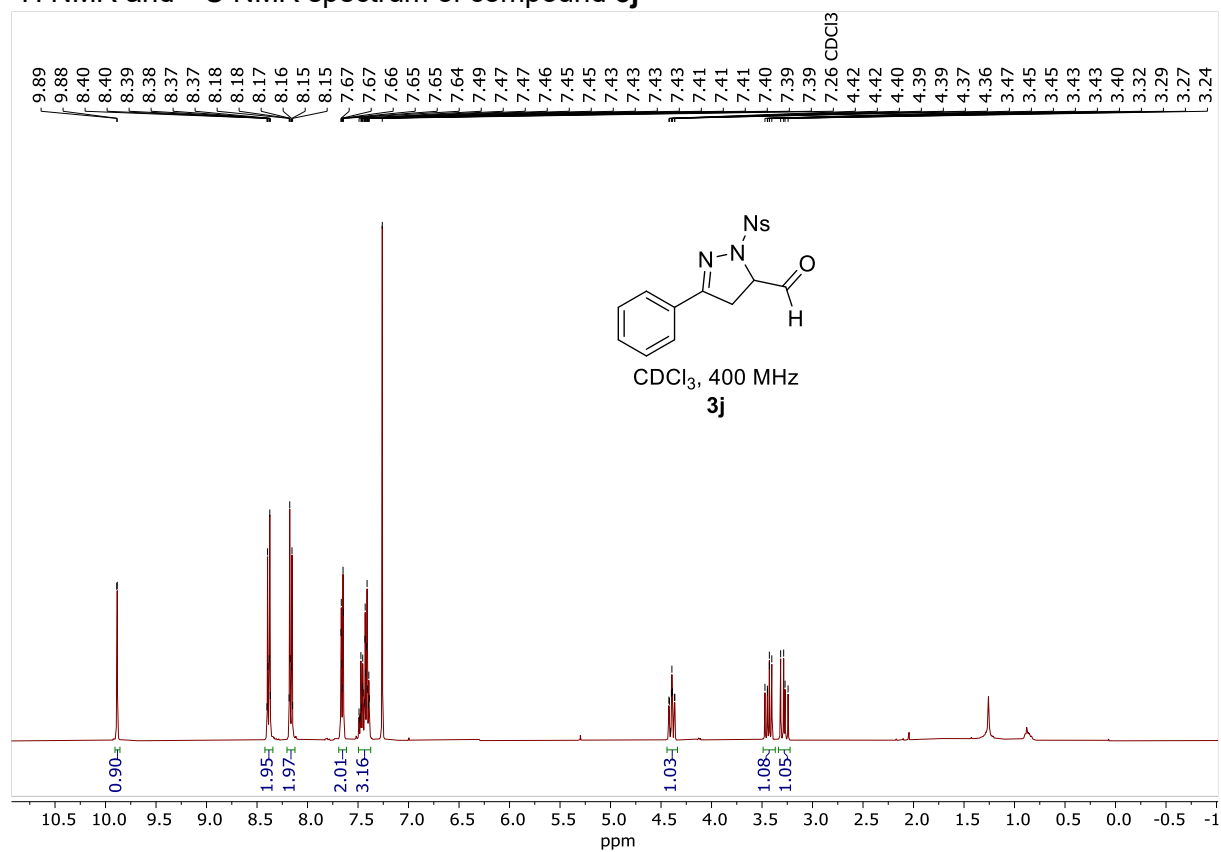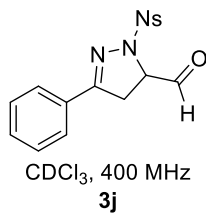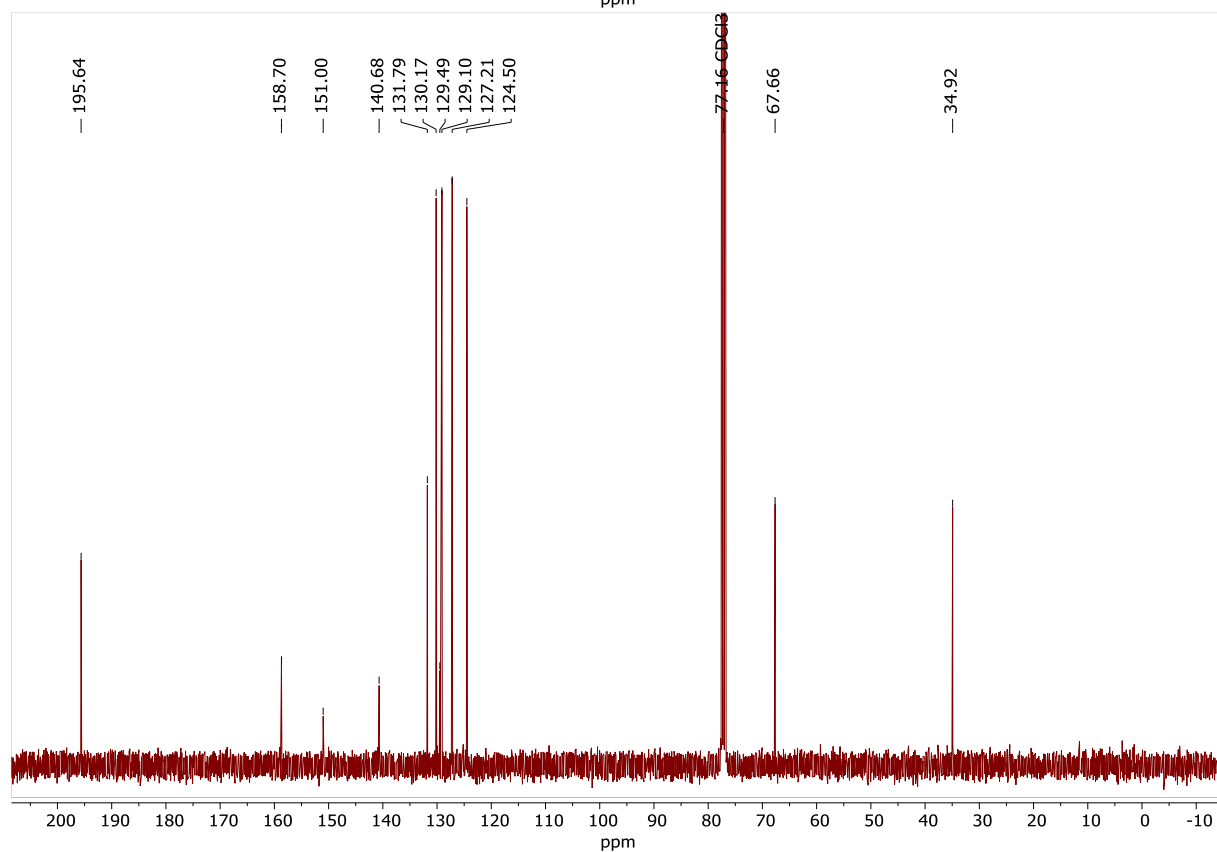



$^1\text{H}$  NMR and  $^{13}\text{C}$  NMR spectrum of compound **9a**

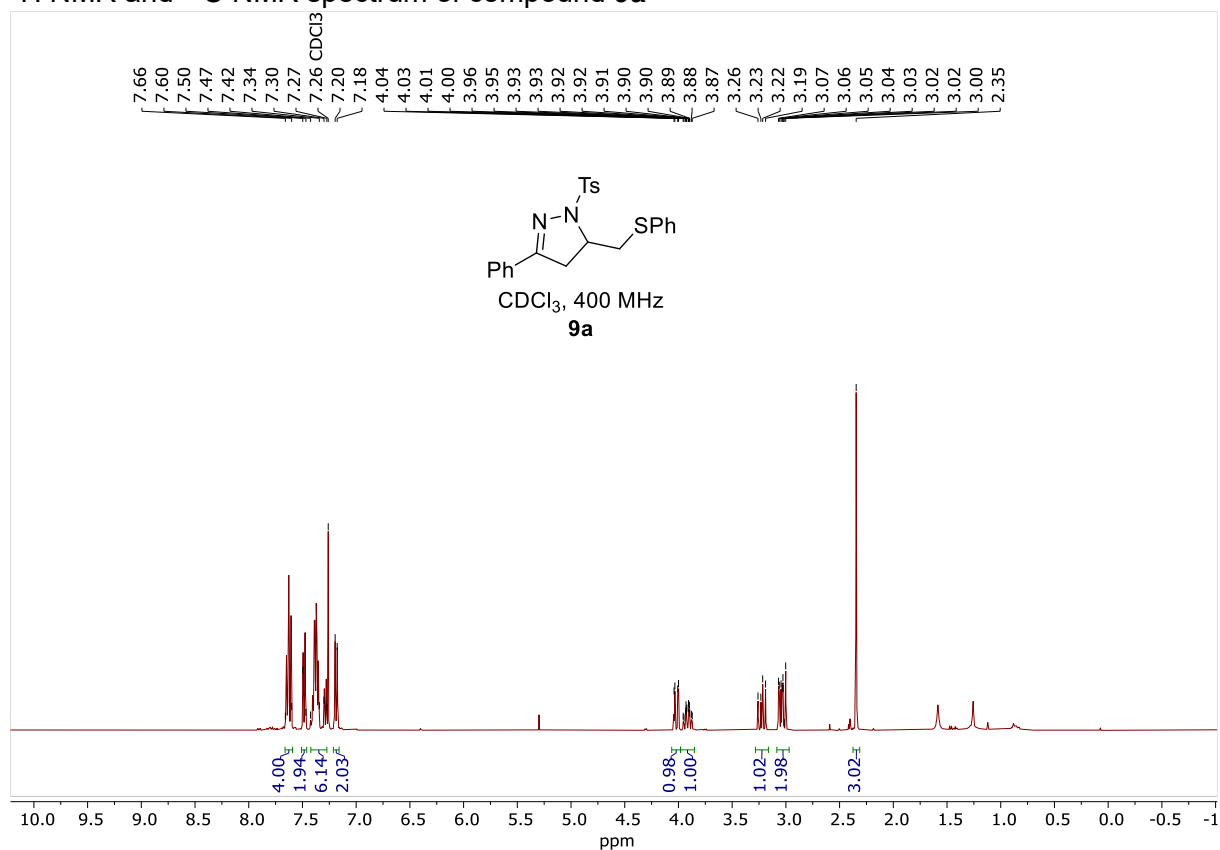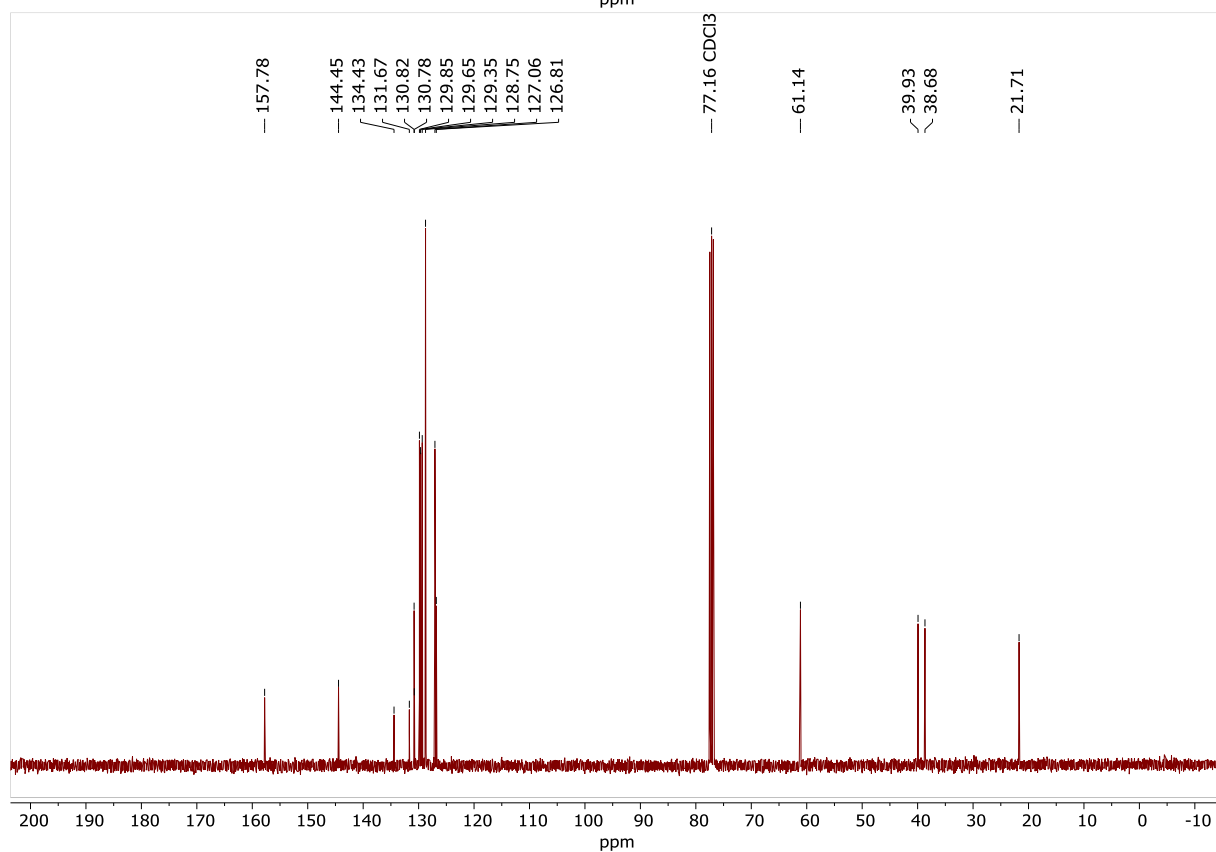

<sup>1</sup>H NMR and <sup>13</sup>C NMR spectrum of compound **9b**

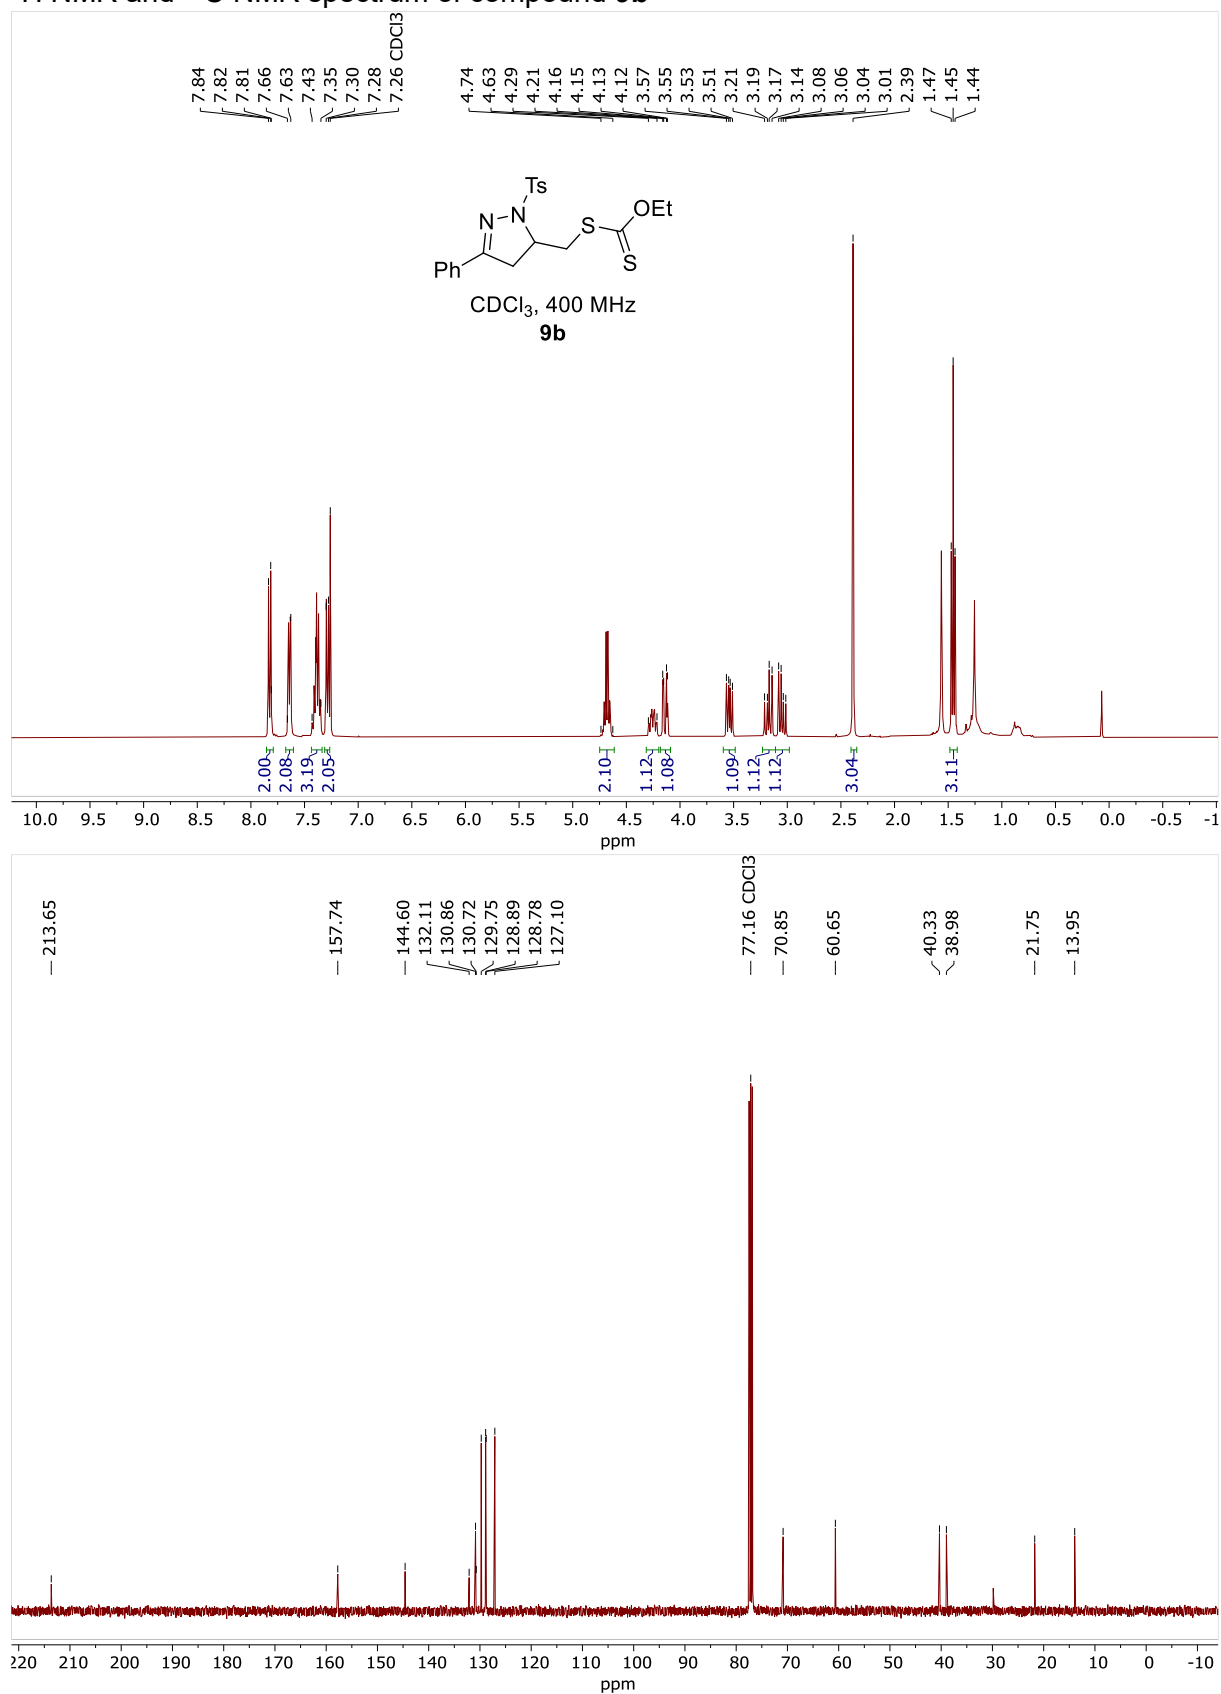

<sup>1</sup>H NMR and <sup>13</sup>C NMR spectrum of compound **9c**

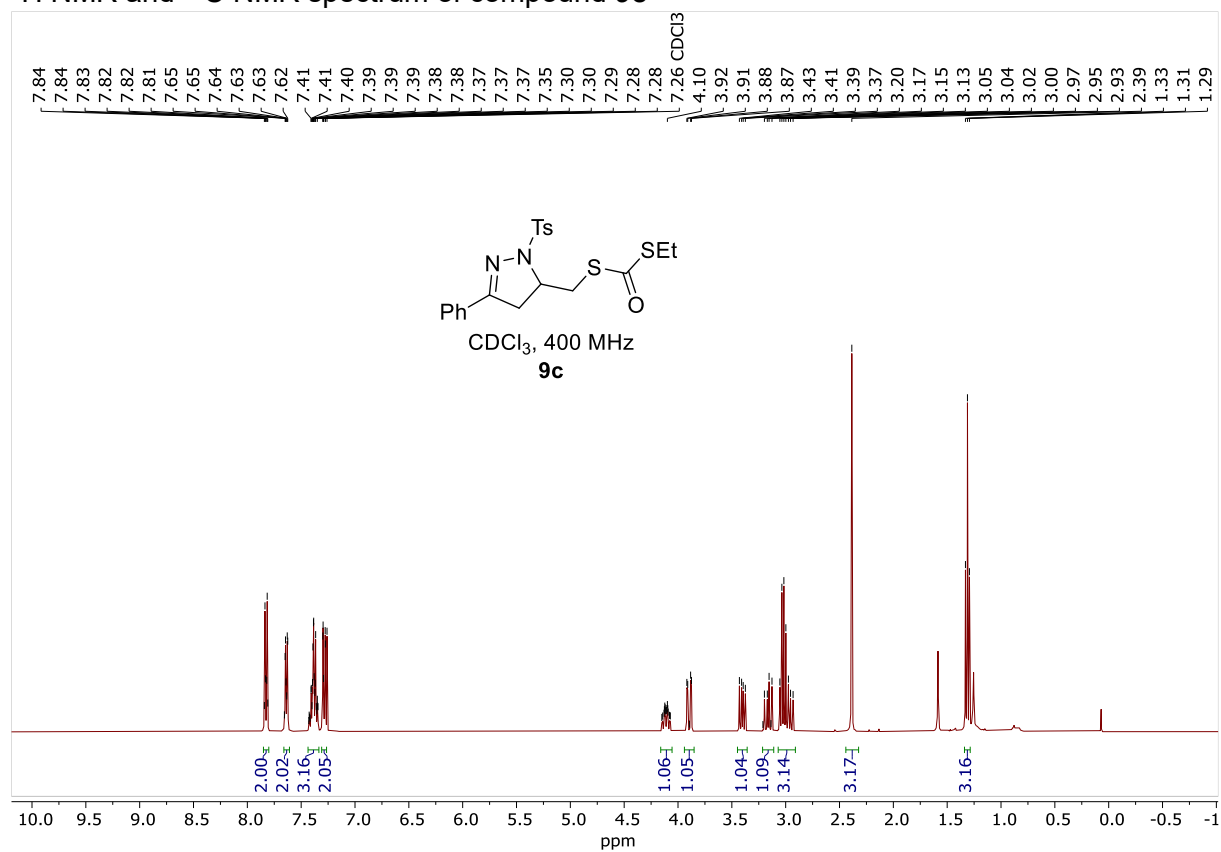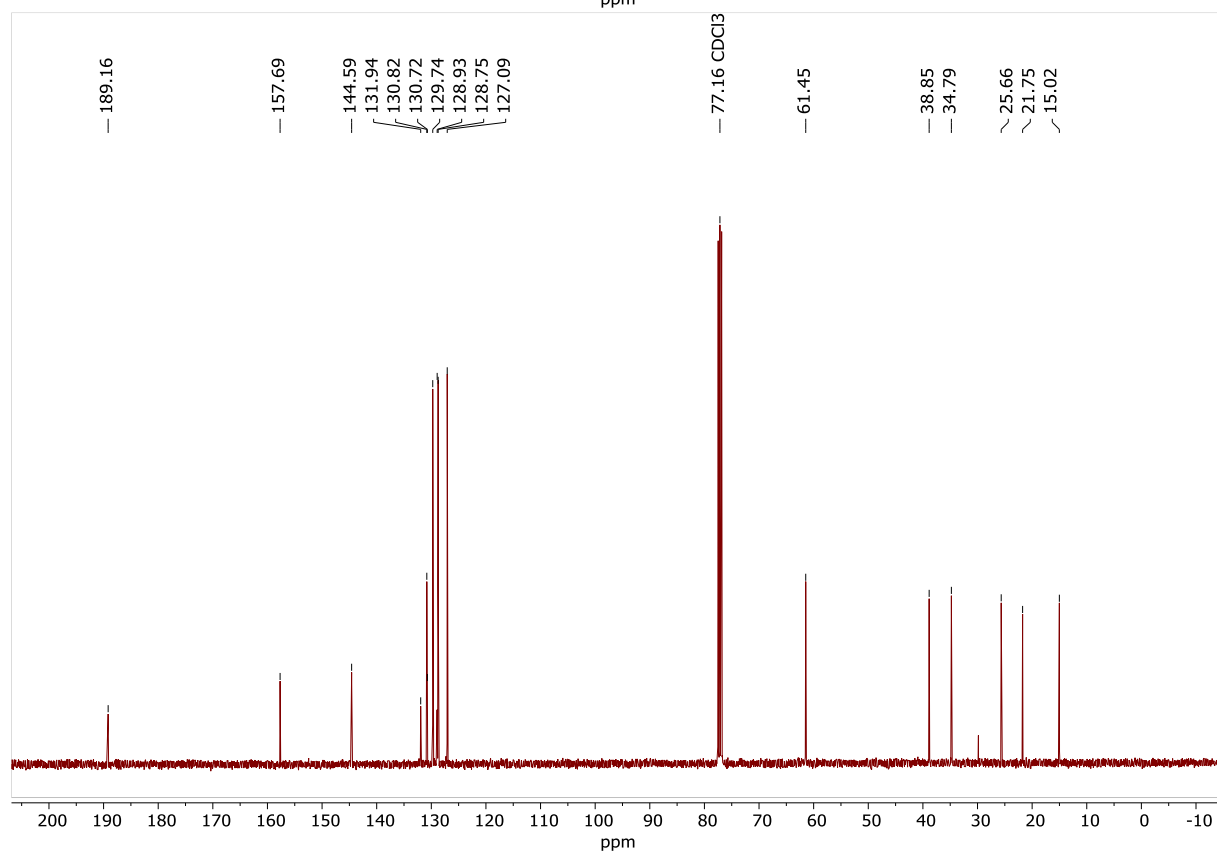

<sup>1</sup>H NMR and <sup>13</sup>C NMR spectrum of compound **9d**

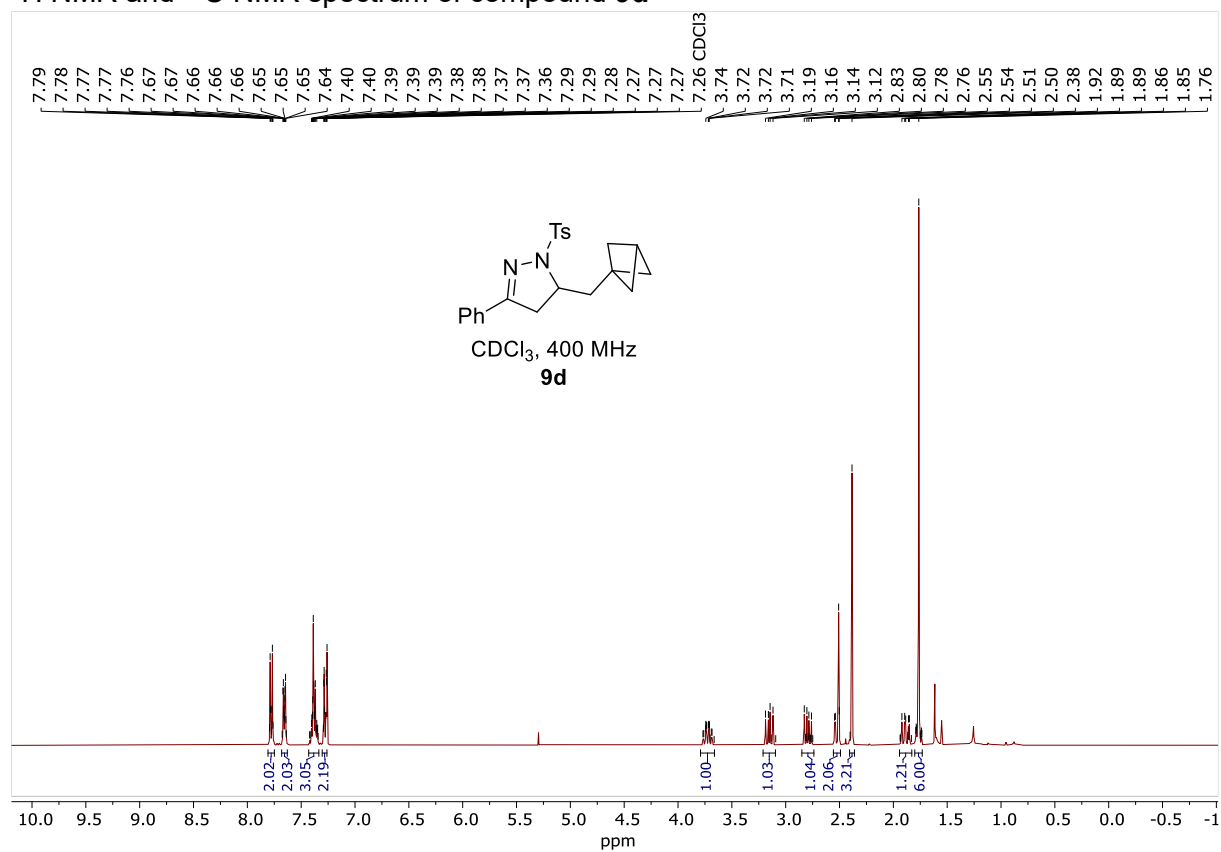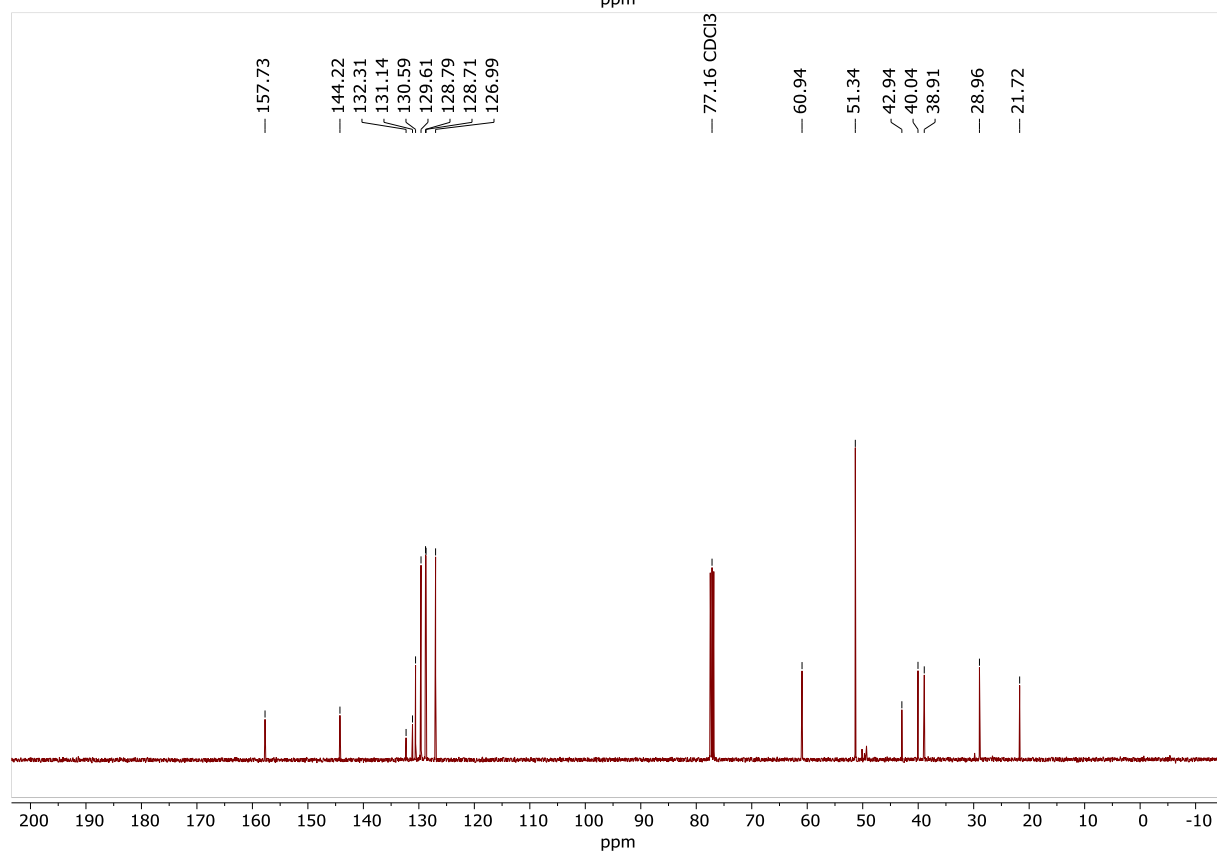



$^1\text{H}$  NMR and  $^{13}\text{C}$  NMR spectrum of compound **9f**

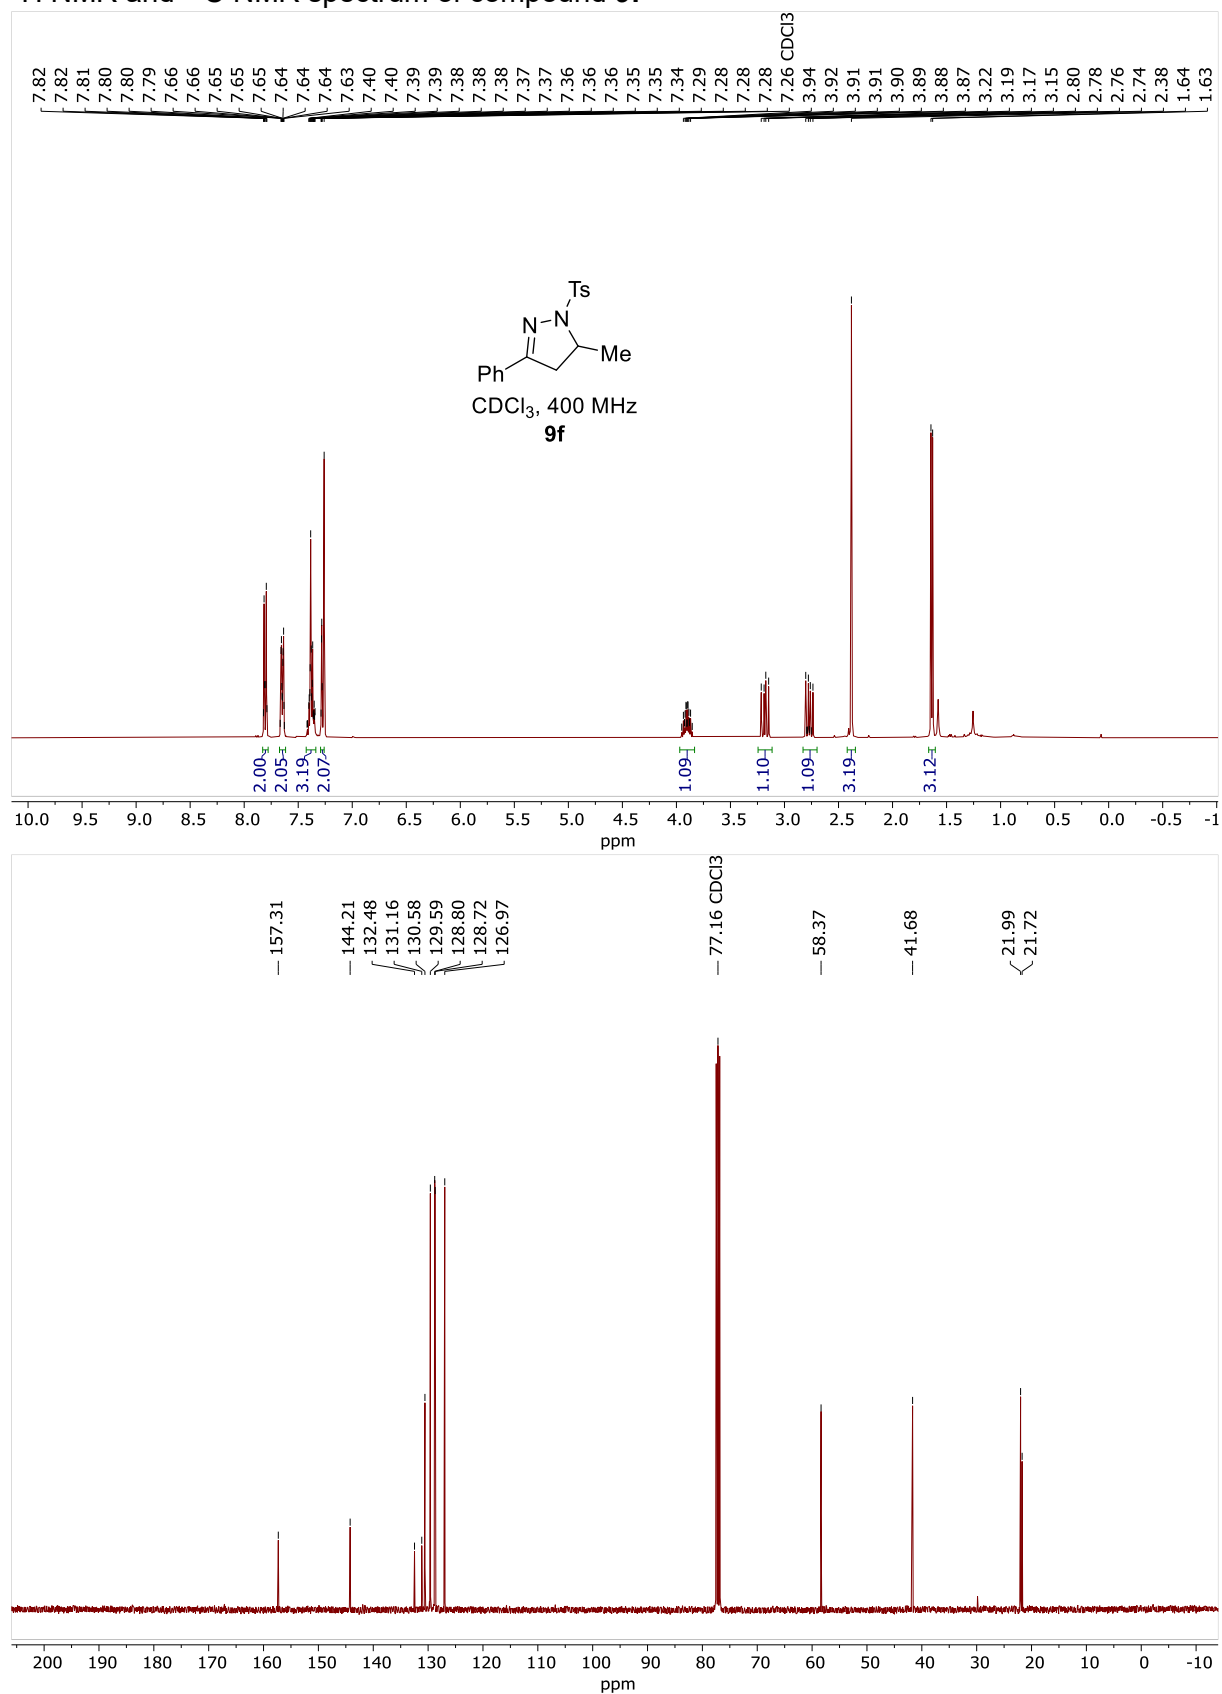

<sup>1</sup>H NMR and <sup>13</sup>C NMR spectrum of compound A

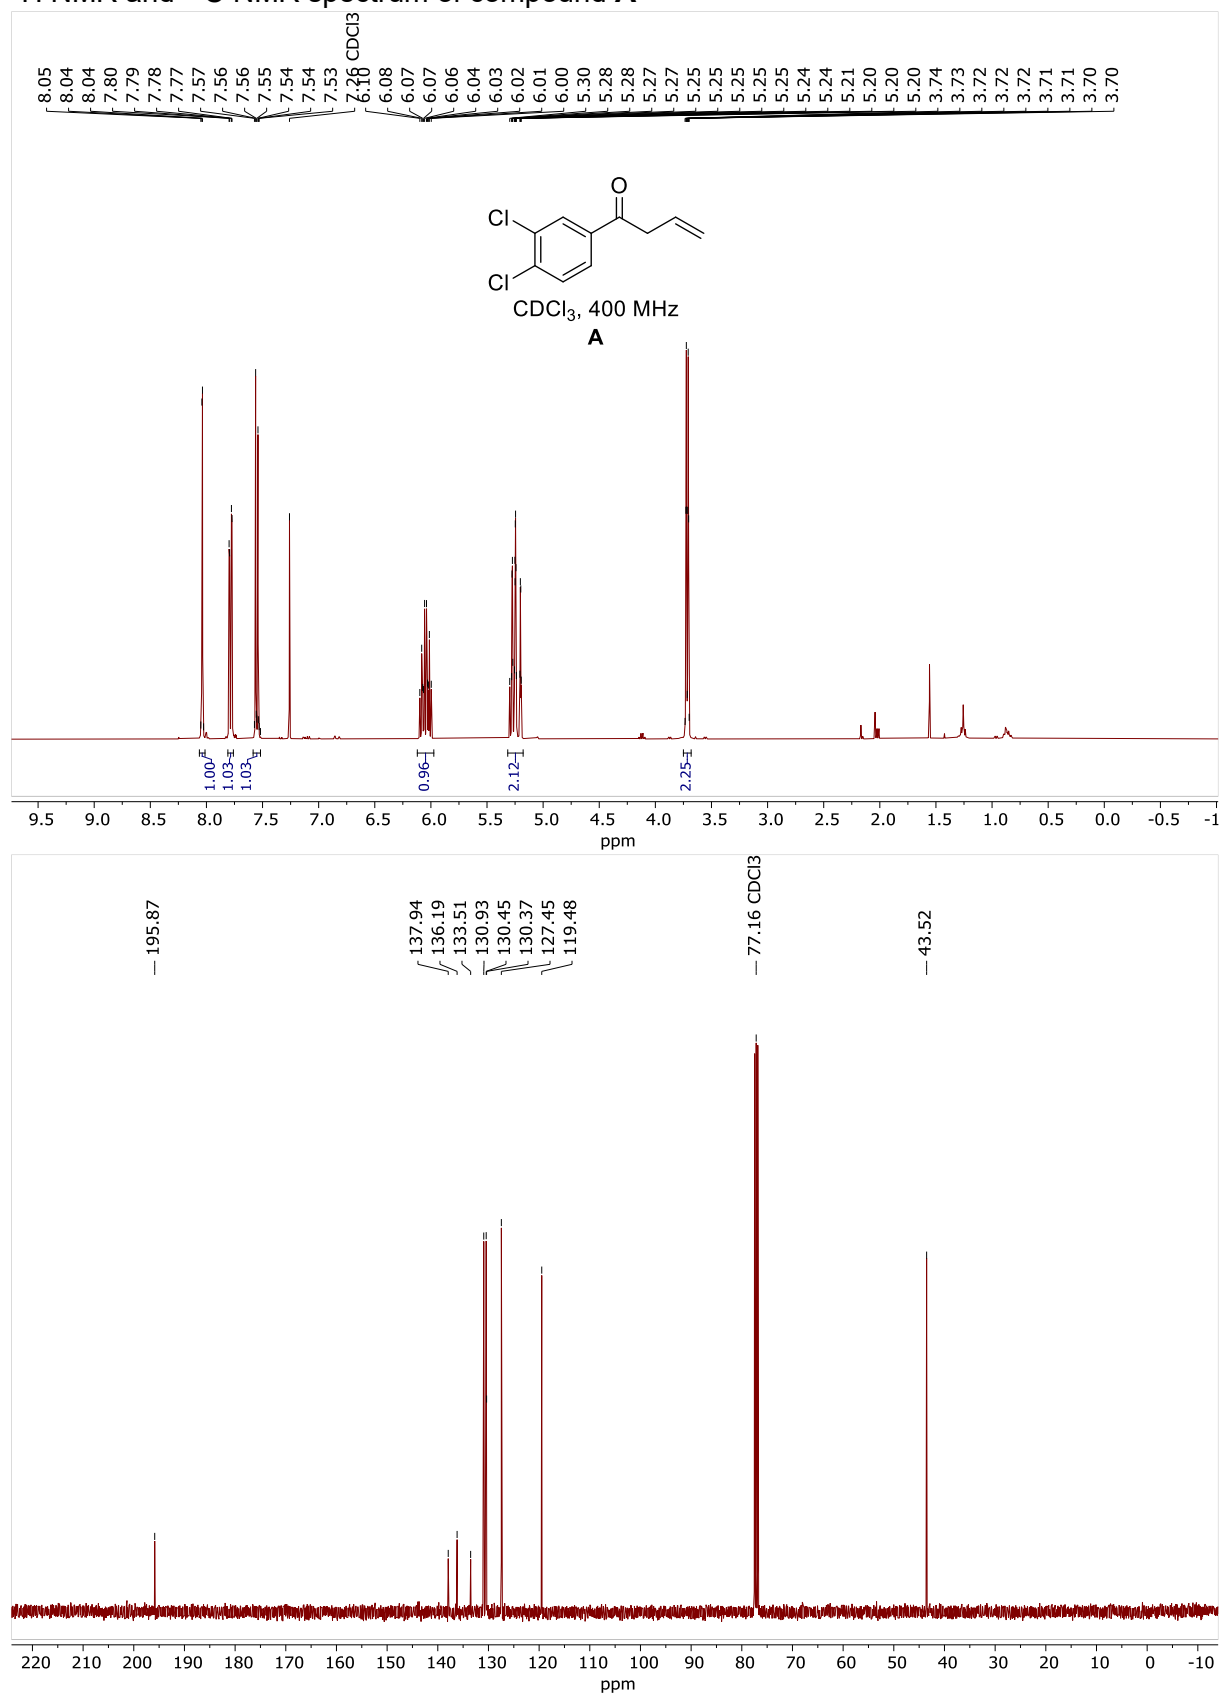

<sup>1</sup>H NMR and <sup>13</sup>C NMR spectrum of compound **C**

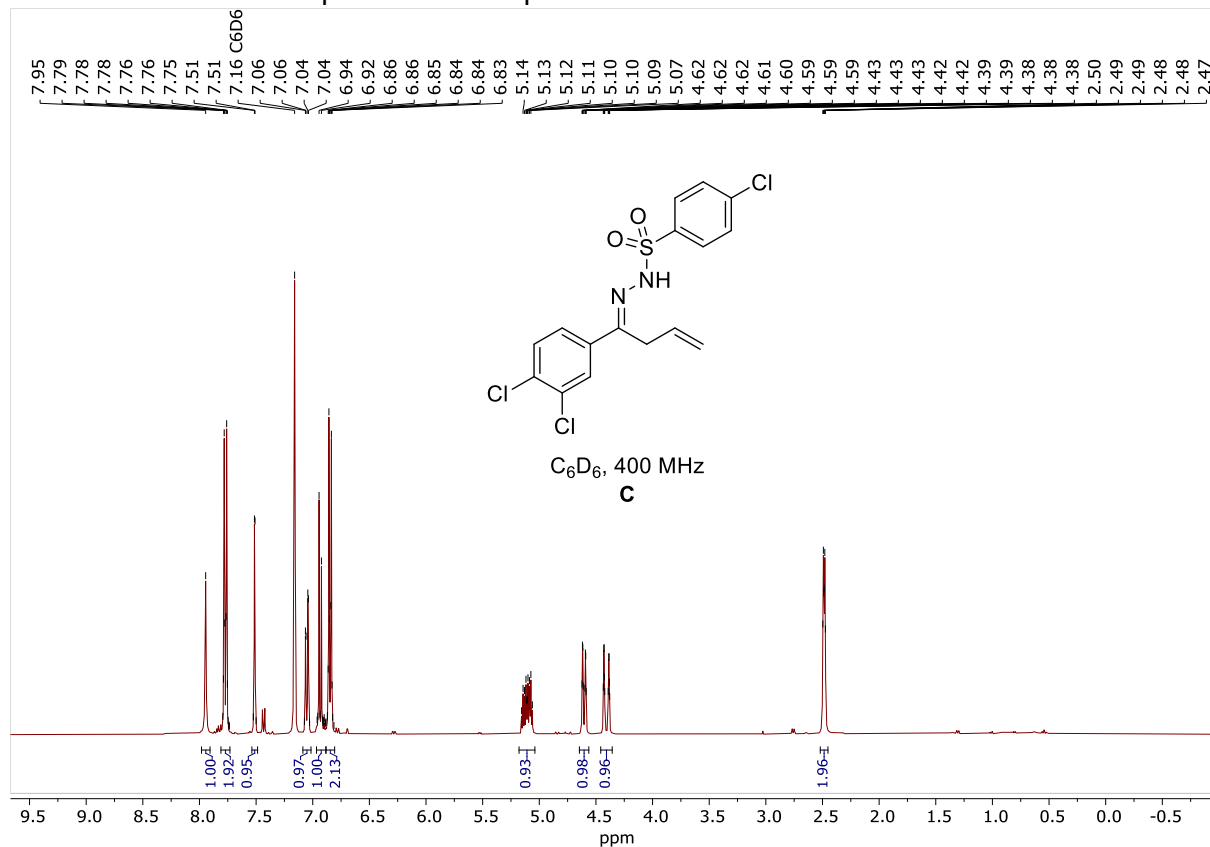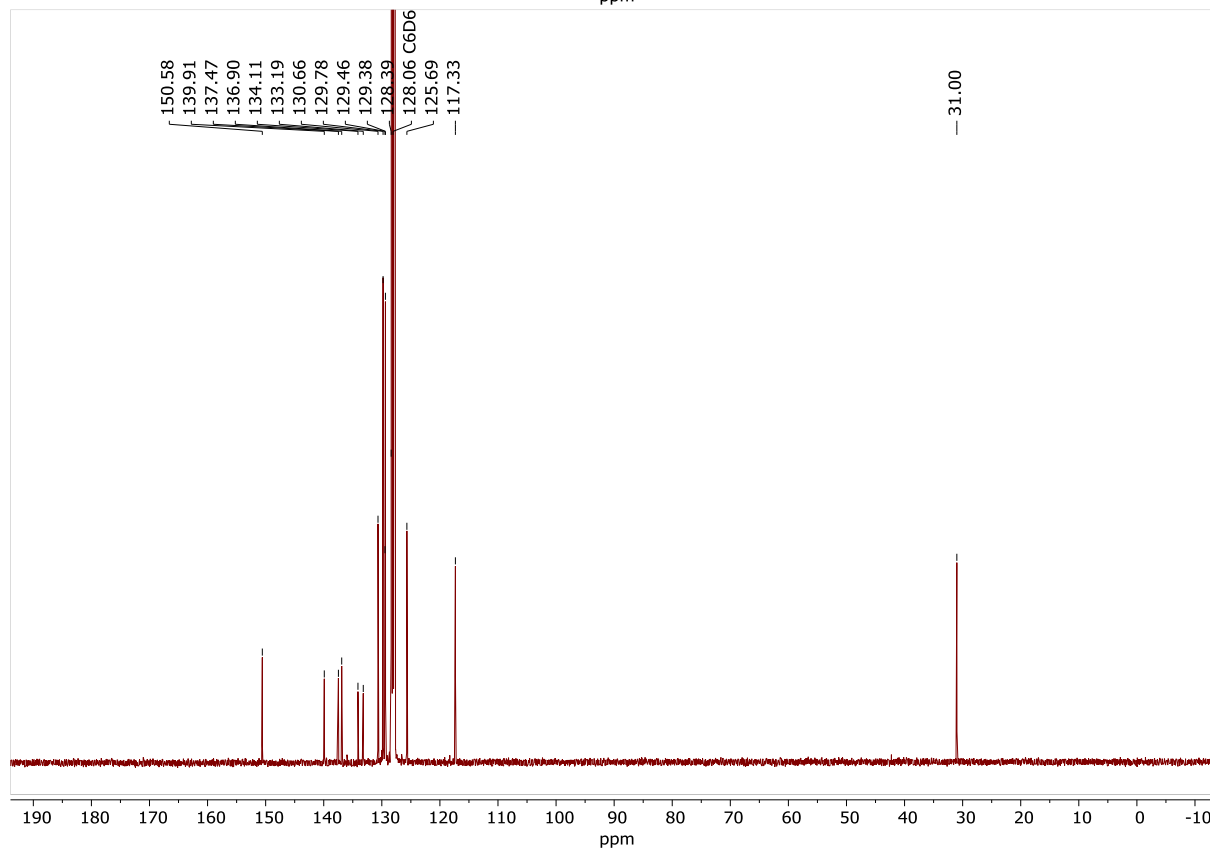



# $^1\text{H}$ NMR and $^{13}\text{C}$ NMR spectrum of compound **9g**

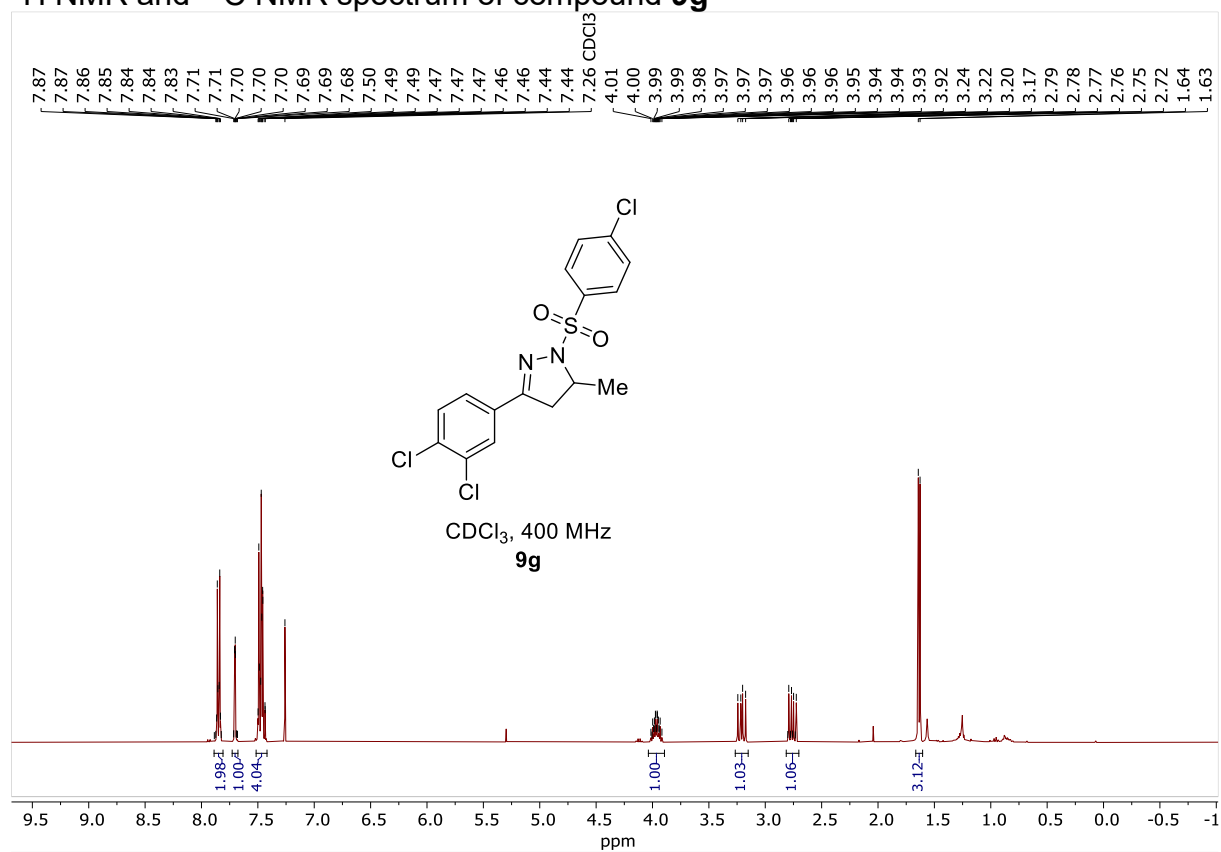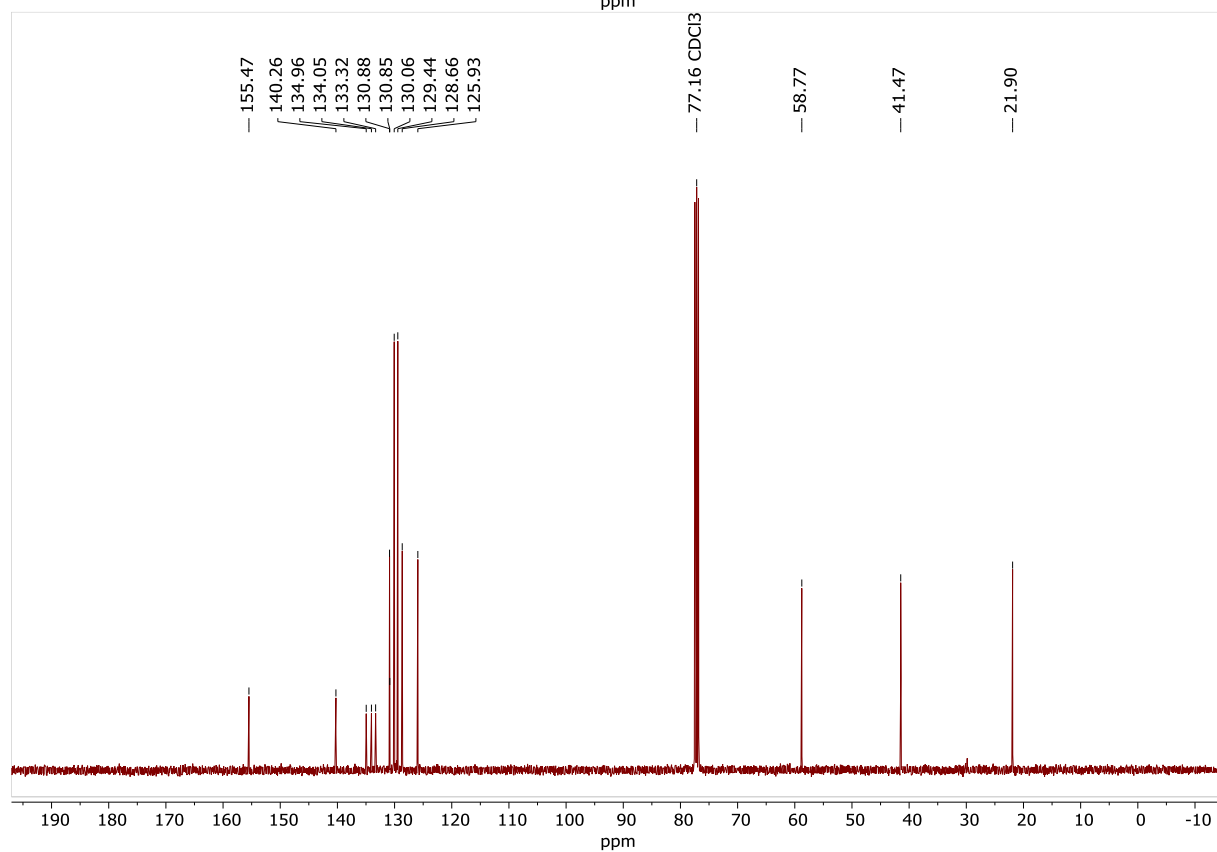

<sup>1</sup>H NMR and <sup>13</sup>C NMR spectrum of compound **9h**

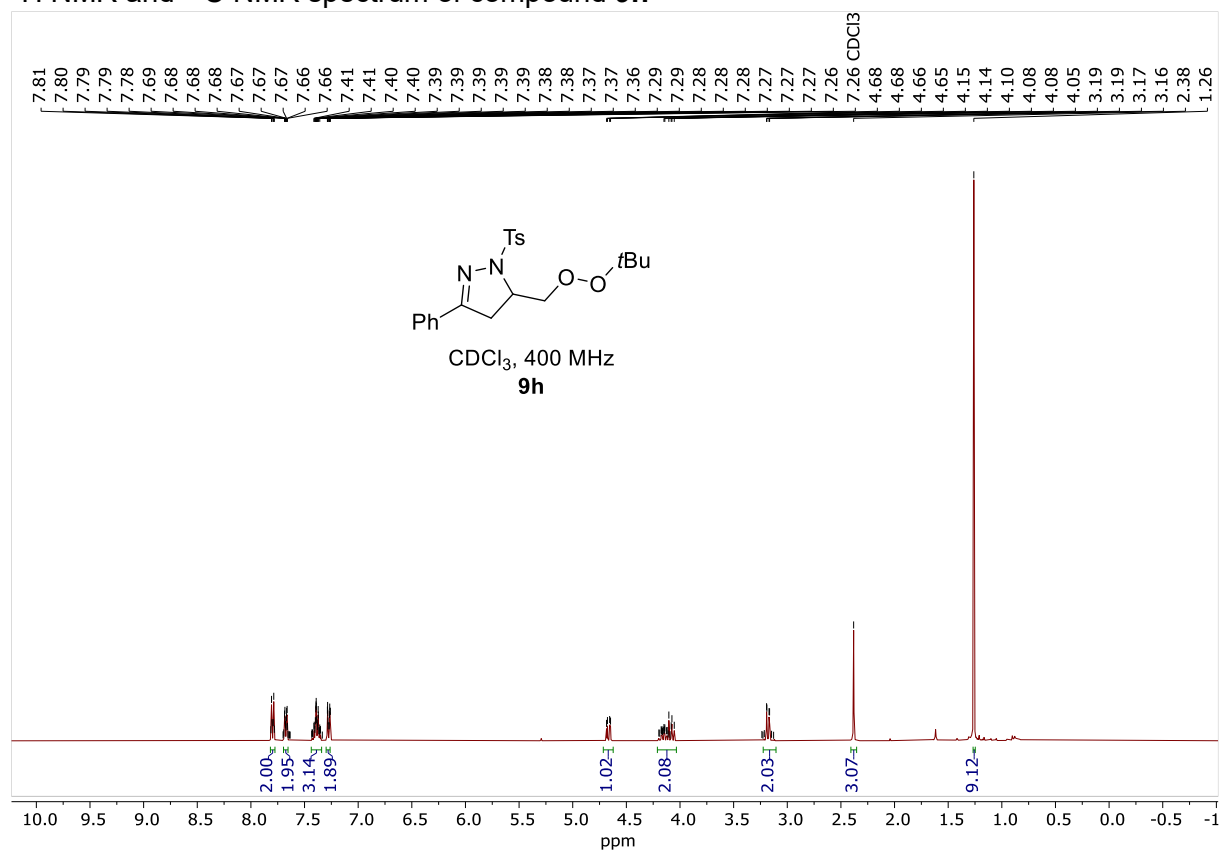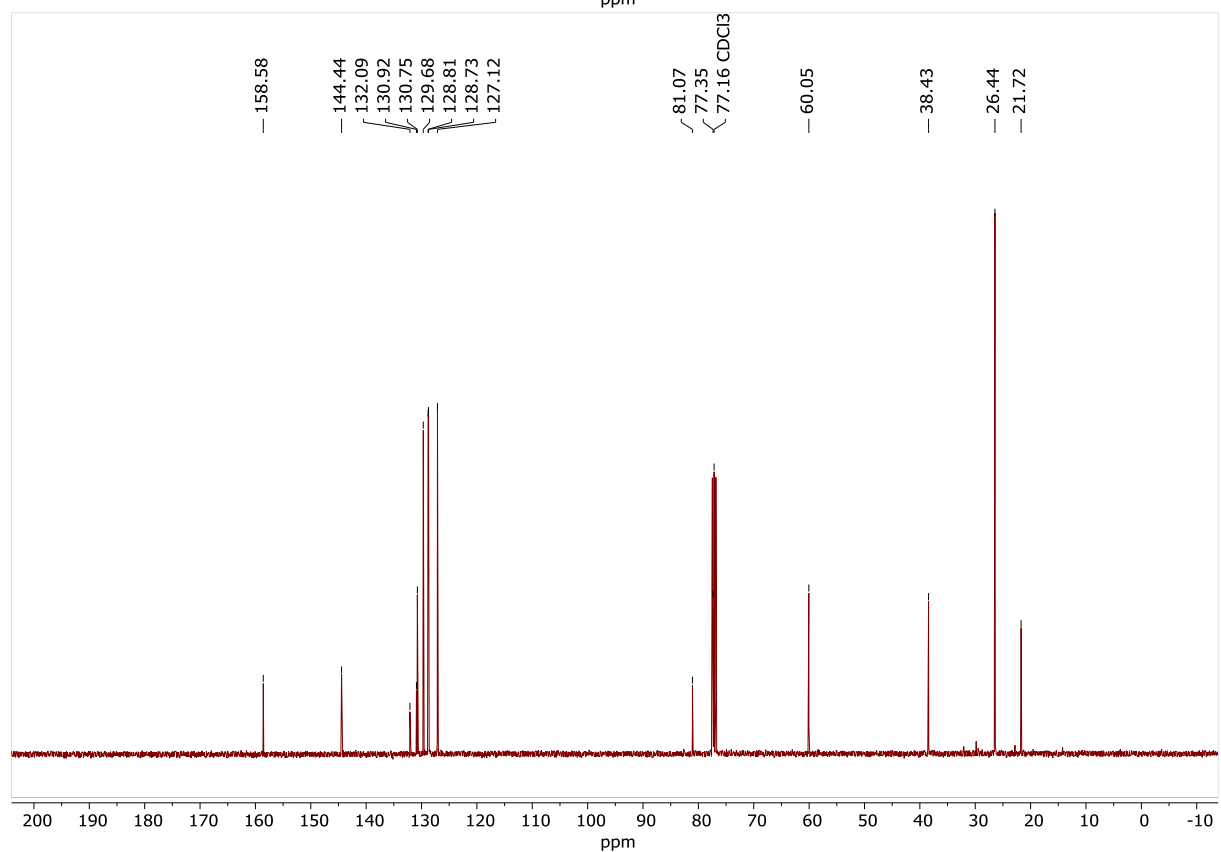

<sup>1</sup>H NMR, <sup>13</sup>C NMR and HMBC spectrum of compound **14**

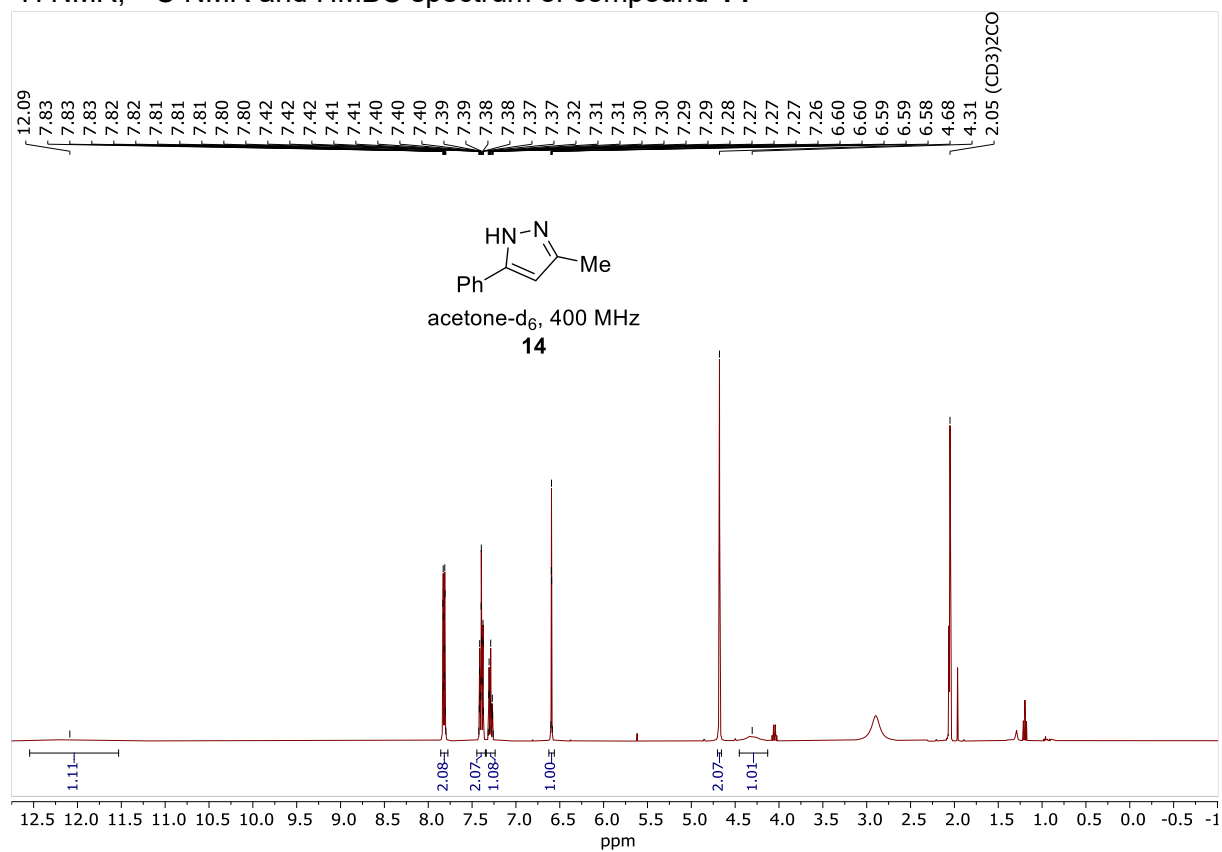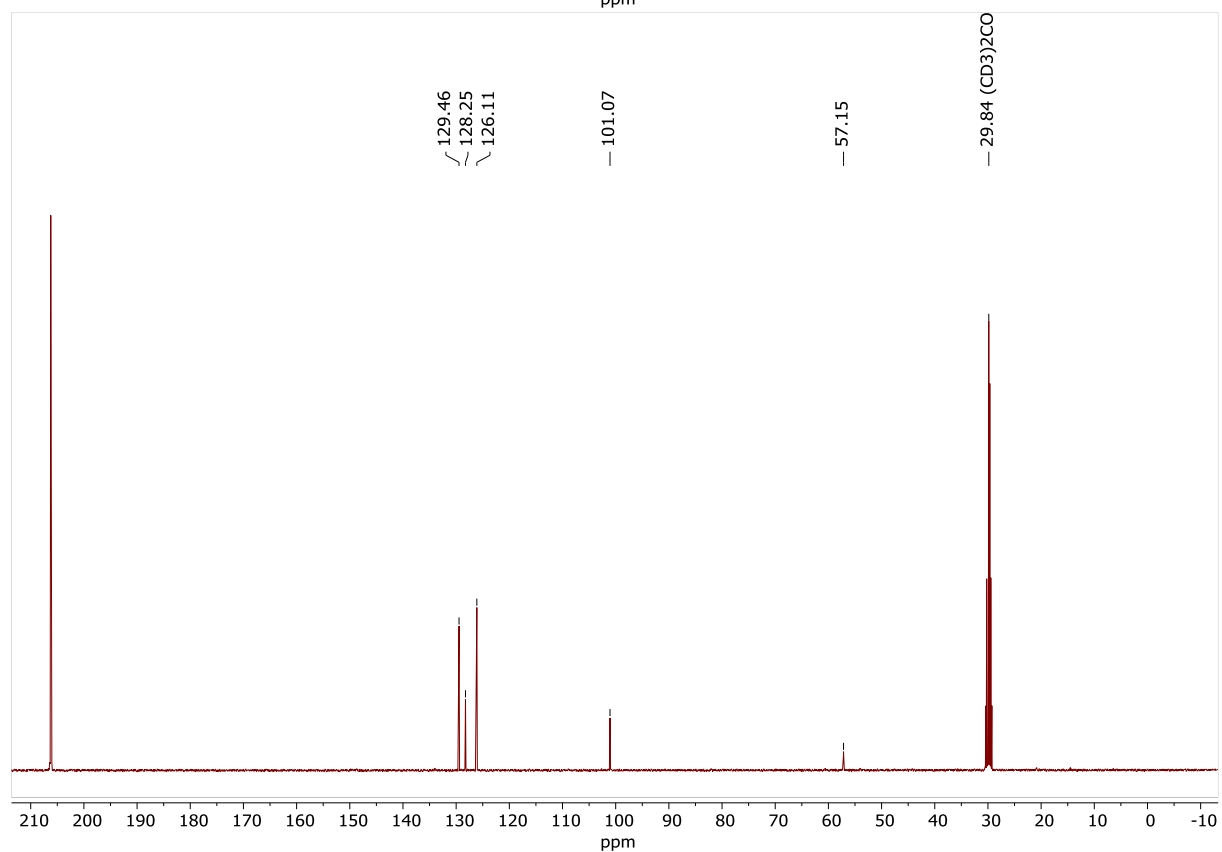

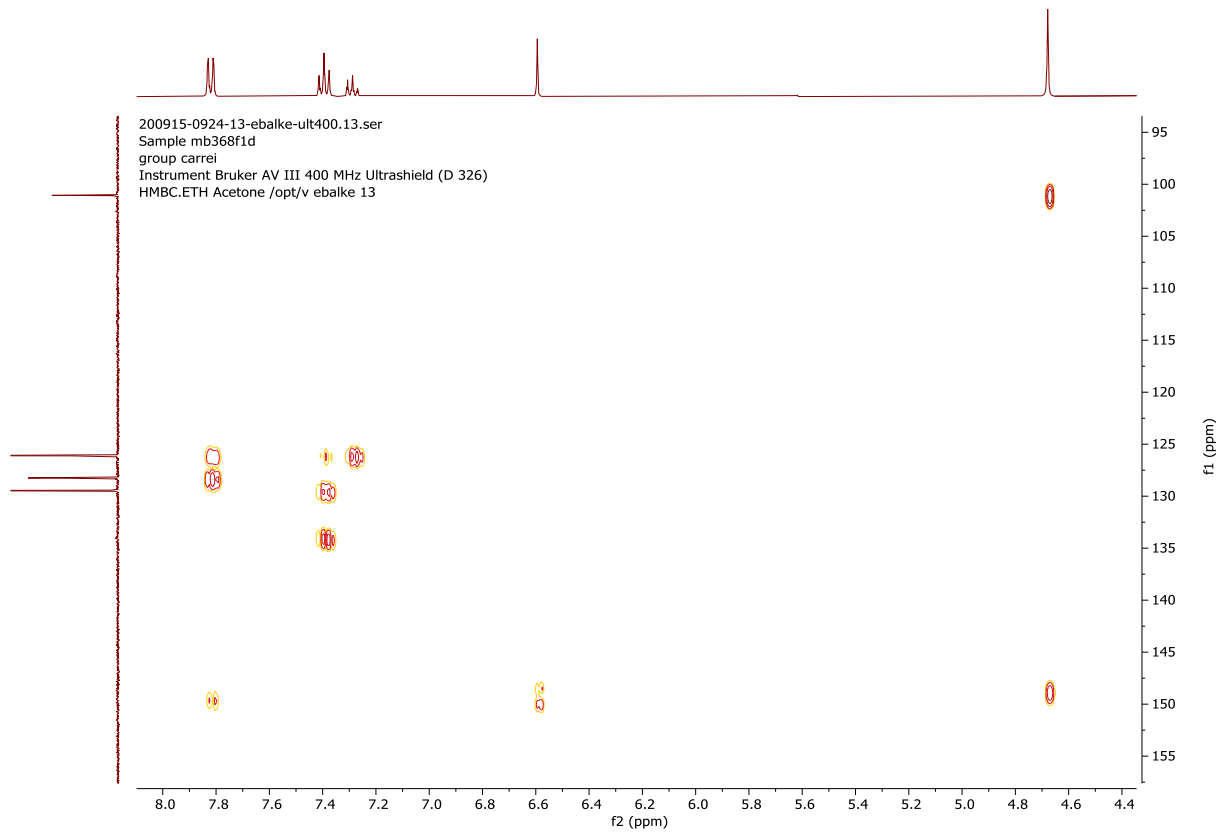

<sup>1</sup>H NMR and <sup>13</sup>C NMR spectrum of compound **15**

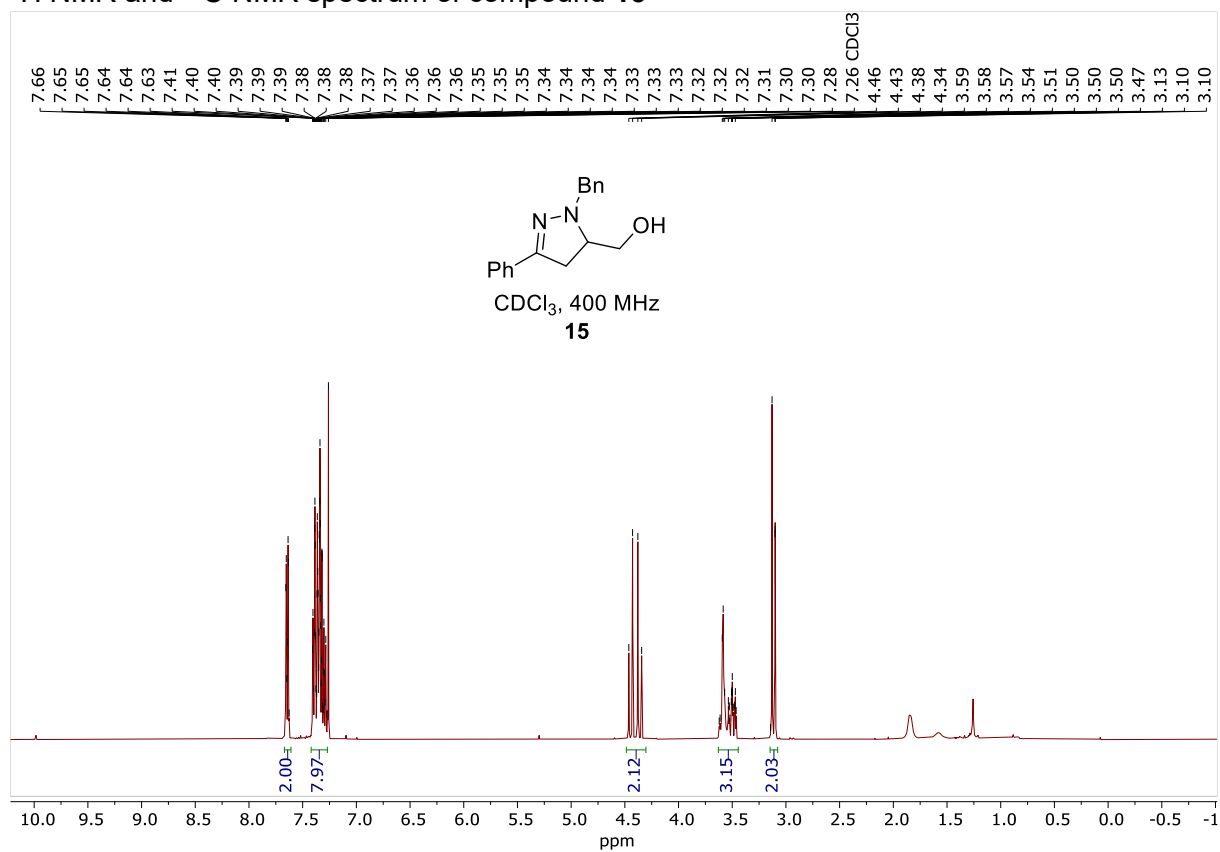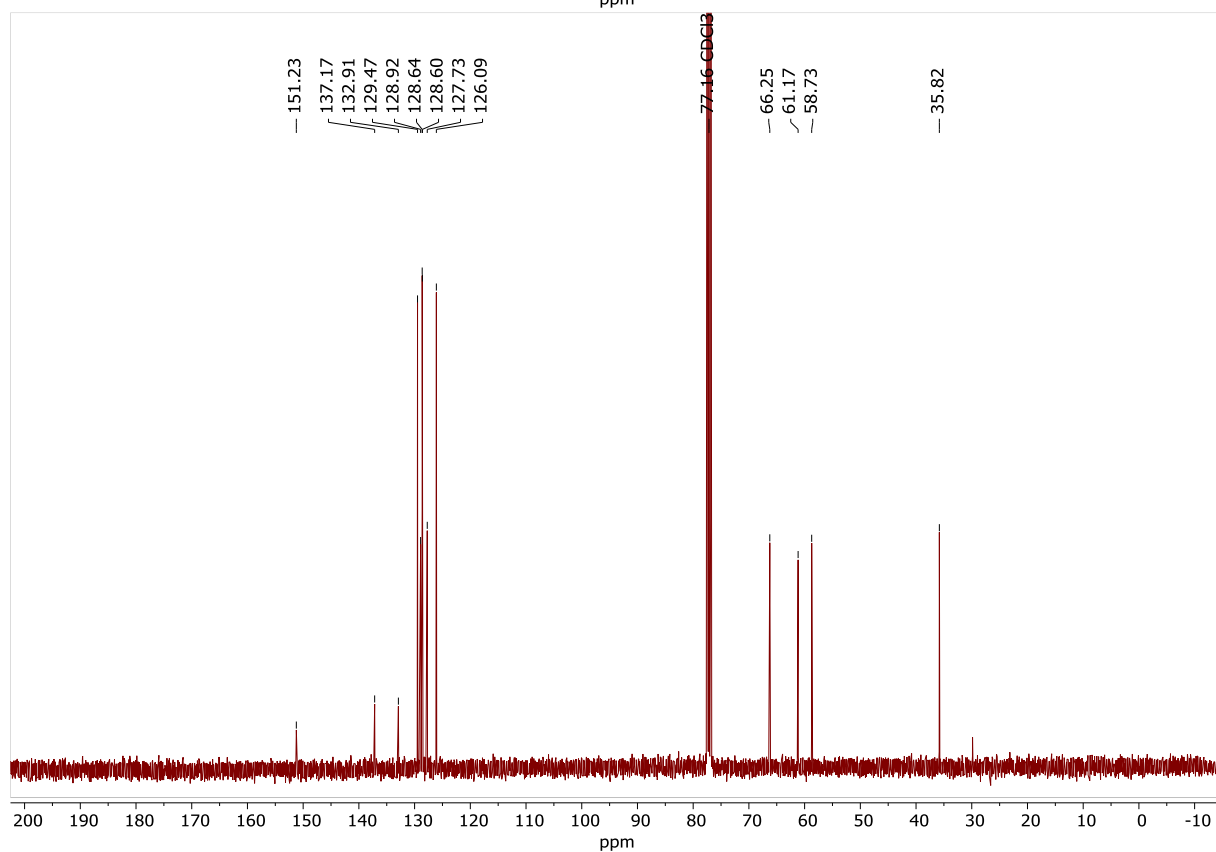

<sup>1</sup>H NMR and <sup>13</sup>C NMR spectrum of compound **16**

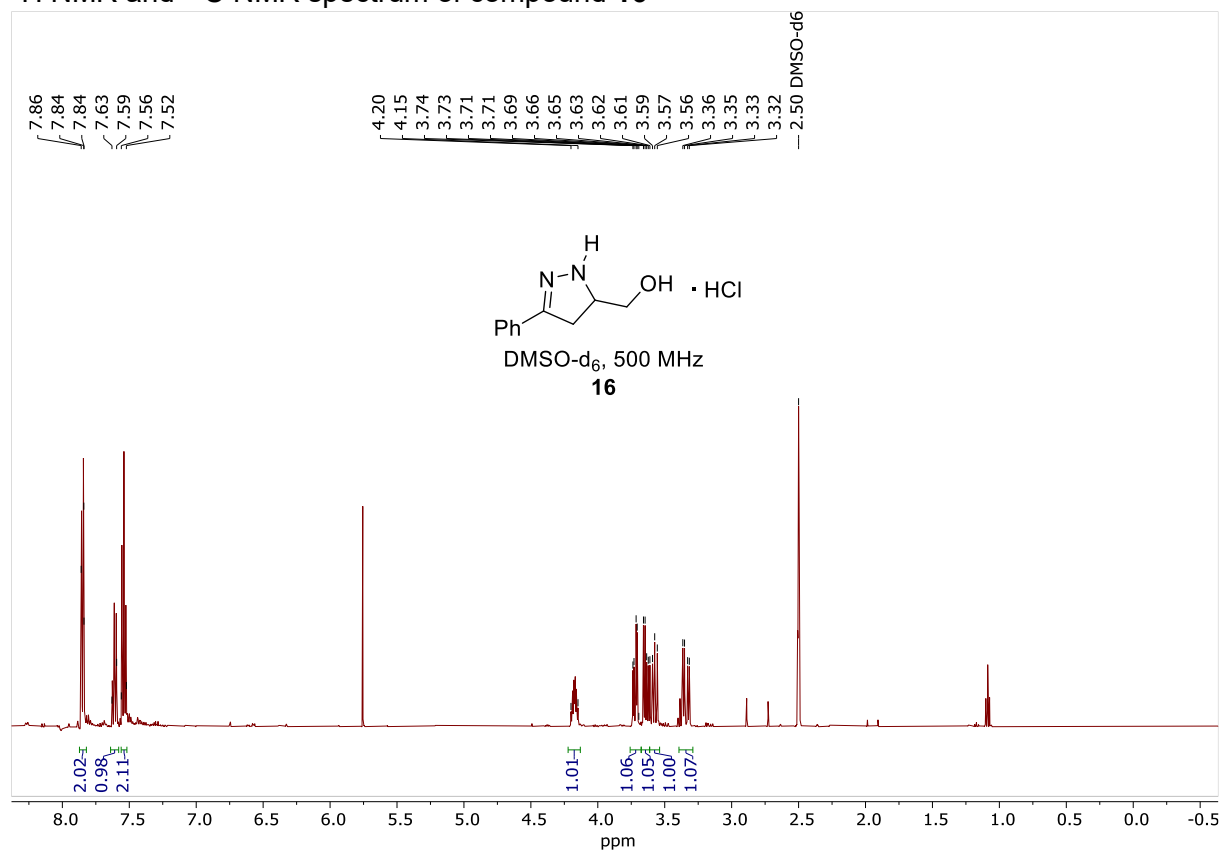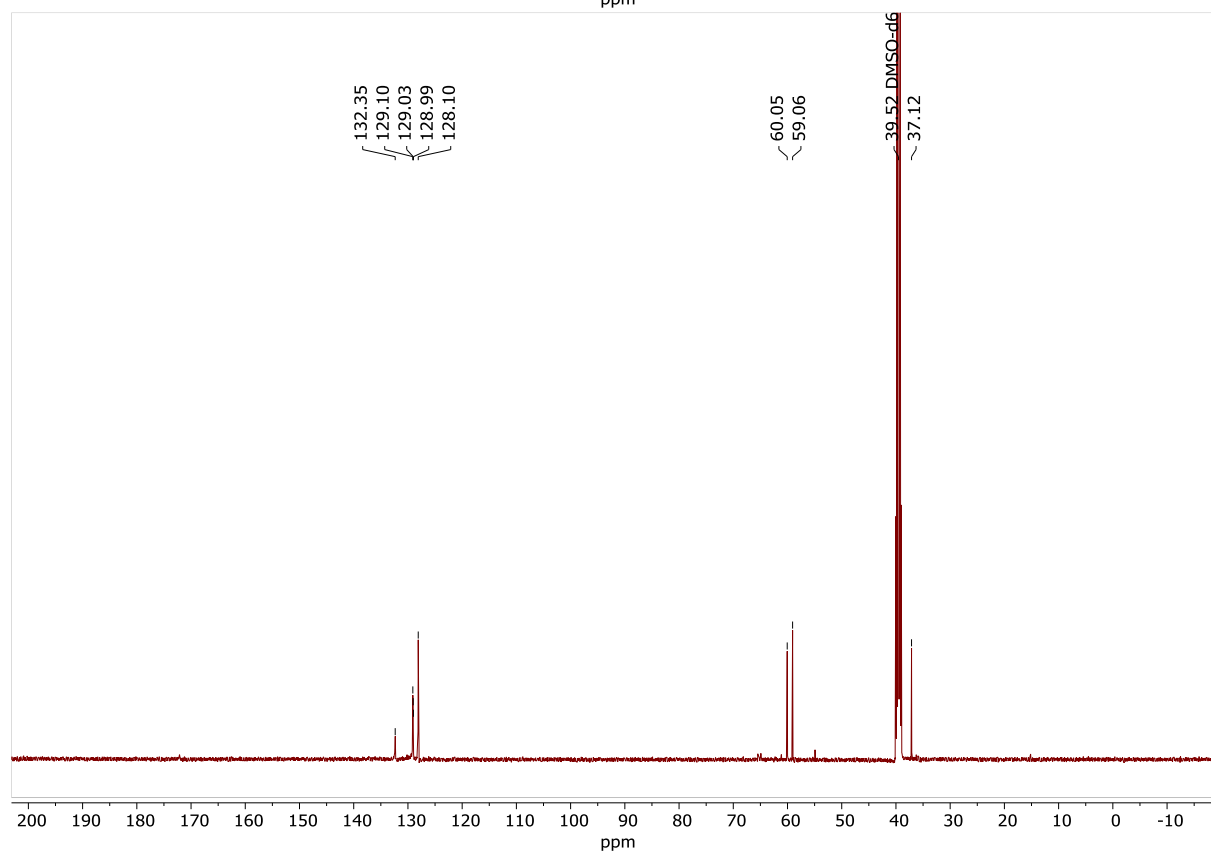

<sup>1</sup>H NMR and <sup>13</sup>C NMR spectrum of compound **17**

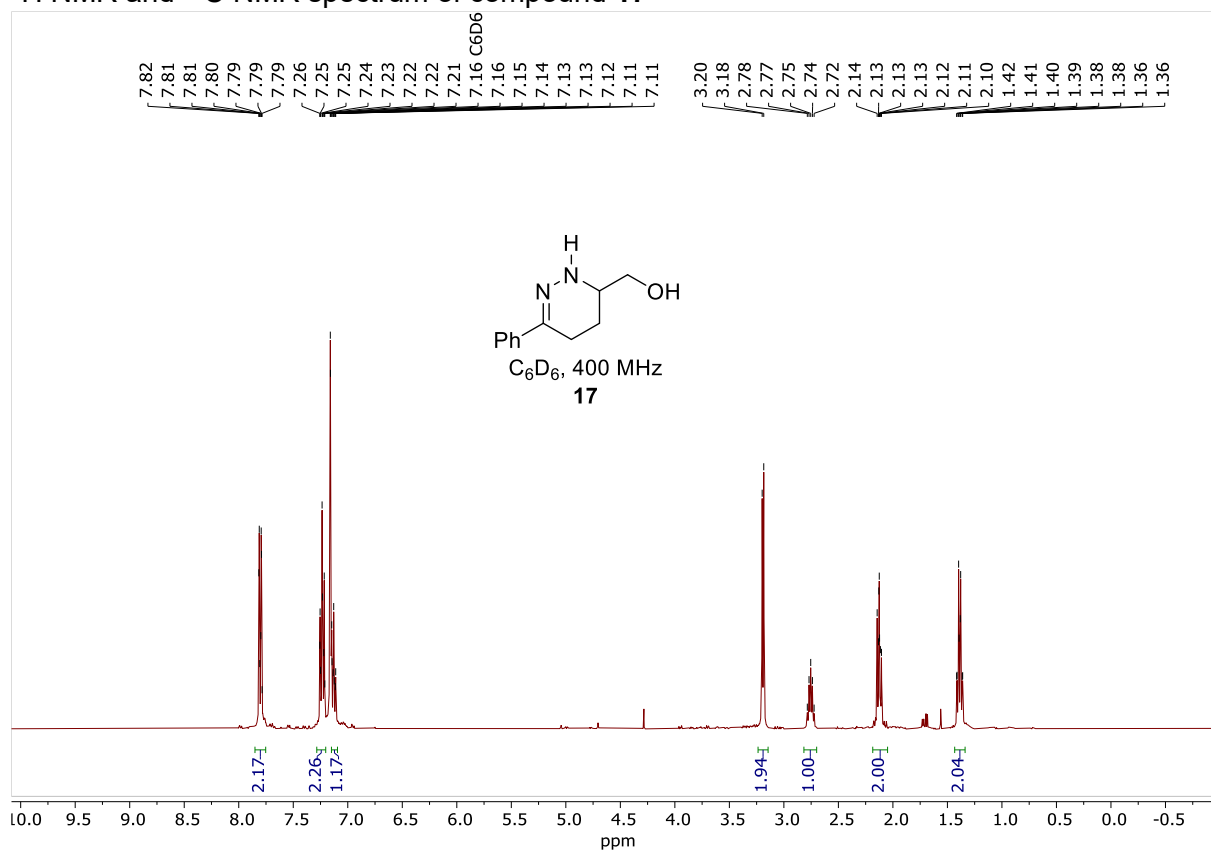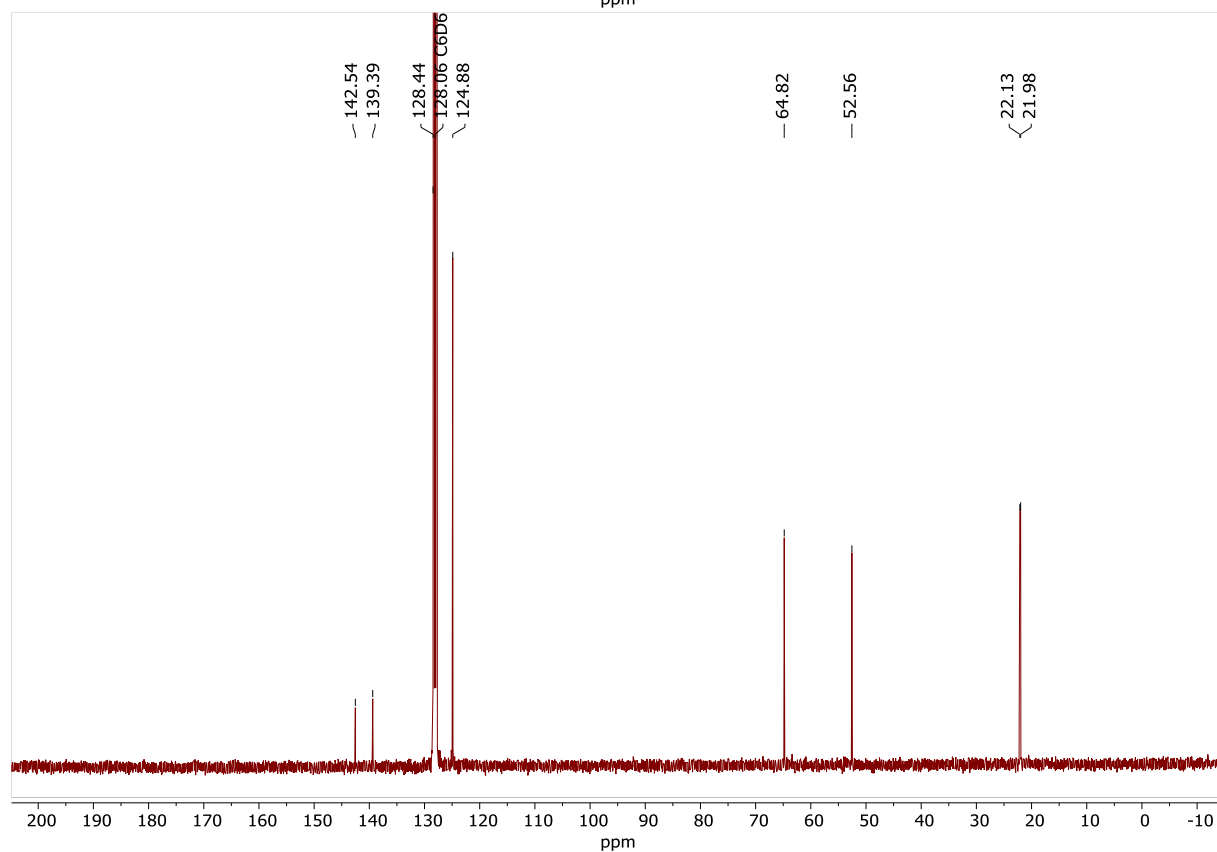

Supplement: au1c00176_si_001.pdf [file au1c00176_si_001.pdf]
